# Supplementary material for: A polysaccharide from Allium tenuissimum L. flowers relieves ulcerative colitis by regulating the inflammatory signaling pathway and gut microbiota
Source: Royal Society of Chemistry journal article supplement (doi:10.1039/d3fo01253k), 2023-01-01
Supplement: d3fo01253k1.xlsx [file d3fo01253k1.xlsx]

## Sheet: Body weight of mice
体重
Groups	Number	1d	2d	3d	4d	5d	6d	7d	8d	9d	10d	11d	12d	13d	14d
Normal	1	40.9	41.5	42.1	42.1	42.7	43.3	43.7	43.7	44.4	45.9	45.1	45.4	46.2	47.4
	2	41.2	41.2	42	42.9	42.9	42.9	43.7	43.8	44.5	46.8	46.4	46.8	46.2	47.7
	3	41.4	41.2	42.4	43.8	44	44.6	44.8	45.2	46.2	46.7	46.9	47.5	47.5	48.2
	4	40.4	40.9	41.8	42.3	42.8	42.7	43.4	44.2	44.8	45.9	46.6	46.7	46.8	47.2
	5	41.2	41.3	42	42.6	43	43.2	44.3	44.7	45.7	46.5	47.1	47.6	48.1	48.7
DSS	1	41	41.9	42.3	42.9	42.1	42	40.1	37.9	37.3	37.15	37.9	37.8	38.1	38.9
	2	40.3	41.7	41.9	42.6	42.1	41.6	39.3	37.5	37.6	37.62	37	36.9	36.4	37.9
	3	41.6	42.1	42.9	42.8	43.3	42.7	40.5	38.3	37.1	36.65	36.4	36.9	37.1	38.8
	4	41.6	42.4	43.3	43	43	42.6	40.6	38.1	37.2	37.86	37.2	37.7	38.4	39.7
	5	41.1	41.4	42.6	42.7	42.9	42	40.3	38.1	37.4	37.36	37.1	36.4	37.2	38.2
SASP	1	41.3	41.7	42.5	42.6	42.7	42	40	38.1	40.9	41.47	43	44.1	44.6	45.4
	2	40.8	41.4	41.8	42.6	42.7	42.1	39.8	37.3	40.2	41	42.9	43.6	44.9	45.8
	3	40.3	41.7	42	42.8	42.7	41.6	39.4	38	40.4	40.62	42.6	43.6	44.7	45.4
	4	41.4	42.4	43.1	43.5	43	42.4	40.8	38.7	40.7	41.91	43.1	43.9	44.8	45.6
	5	40.3	40.6	41.5	42.5	42.2	41.8	38.8	37.1	40.8	41.32	42.7	43.7	44.9	45.5
	6	40.2	40.8	41.6	42.2	41.8	41.4	39.9	37.8	40.1	41.12	42.4	43.8	44.1	45.7
LATFP	1	40.7	41.2	42.6	43.1	42.7	42.4	38.9	37	37.2	36.8	37.9	38.3	39.5	40.9
	2	40	40.9	41.2	42	42.3	42.1	39.5	37.3	37.7	36.58	37.6	38.2	39.3	41.1
	3	41.1	41	42.4	42.7	42.4	42.2	40.4	38.8	38.3	37.28	38.1	38.4	38.9	40.5
	4	41.1	42.7	43	43	42.9	42.1	40.7	38.1	38	37.42	38.3	38.8	39.2	40.7
	5	41.1	41.4	42.1	42.8	42.7	42.2	40.5	39.3	38.7	37.75	38.1	38.4	39.5	40.8
	6	40	41.2	41.8	42.3	41.6	41.2	39.7	37.9	37.2	37.93	37.8	38.3	39.4	40.4
HATFP	1	40.6	41.6	42.5	42.4	42	41.2	39.8	37.8	40.4	40.5	41.5	42.8	43.6	44.8
	2	39.6	41.5	41	41.9	41.4	41.5	39	37.1	39.6	40	41.8	42.7	43.6	44.8
	3	41.3	42.7	43	43	42.4	42	40.2	38	40.5	41	42.4	43.6	44.5	45
	4	41	42.4	43	43.3	42.8	42.1	40.4	38.4	40.7	40.9	42.2	43.1	43.7	44.8
	5	41.6	42.9	43.4	43	42.7	42.2	40.8	38.4	40.7	41.2	43.1	44.8	44.6	45.7
	6	41.1	42.6	43.1	43.3	43.3	42.1	40.5	37.8	40.7	41.3	41.7	43.8	44.4	45.7
Body weight change (%)
Groups	Number	1d	2d	3d	4d	5d	6d	7d	8d	9d	10d	11d	12d	13d	14d
Normal	1	101.467	102.934	102.934	104.401	105.868	106.846	106.846	108.557	112.225	110.269	111.002	112.958	115.892
	2	100	101.942	104.126	104.126	104.126	106.068	106.311	108.01	113.592	112.621	113.592	112.136	115.777
	3	99.5169	102.415	105.797	106.28	107.729	108.213	109.179	111.594	112.802	113.285	114.734	114.734	116.425
	4	101.238	103.465	104.703	105.941	105.693	107.426	109.406	110.891	113.614	115.347	115.594	115.842	116.832
	5	100.243	101.942	103.398	104.369	104.854	107.524	108.495	110.922	112.864	114.32	115.534	116.748	118.204
DSS	1	102.195	103.171	104.634	102.683	102.439	97.8049	92.439	90.9756	90.6098	92.439	92.1951	92.9268	94.878
	2	103.474	103.97	105.707	104.467	103.226	97.5186	93.0521	93.3002	93.3499	91.8114	91.5633	90.3226	94.0447
	3	101.202	103.125	102.885	104.087	102.644	97.3558	92.0673	89.1827	88.101	87.5	88.7019	89.1827	93.2692
	4	101.923	104.087	103.365	103.365	102.404	97.5962	91.5865	89.4231	91.0096	89.4231	90.625	92.3077	95.4327
	5	100.73	103.65	103.893	104.38	102.19	98.0535	92.7007	90.9976	90.9002	90.2676	88.5645	90.5109	92.944
SASP	1	100.969	102.906	103.148	103.39	101.695	96.8523	92.2518	99.0315	100.412	104.116	106.78	107.99	109.927
	2	101.471	102.451	104.412	104.657	103.186	97.549	91.4216	98.5294	100.49	105.147	106.863	110.049	112.255
	3	103.474	104.218	106.203	105.955	103.226	97.7667	94.2928	100.248	100.794	105.707	108.189	110.918	112.655
	4	102.415	104.106	105.072	103.865	102.415	98.5507	93.4783	98.3092	101.232	104.106	106.039	108.213	110.145
	5	100.744	102.978	105.459	104.715	103.722	96.2779	92.0596	101.241	102.531	105.955	108.437	111.414	112.903
	6	101.493	103.483	104.975	103.98	102.985	99.2537	94.0299	99.7512	102.289	105.473	108.955	109.701	113.682
LATFP	1	101.229	104.668	105.897	104.914	104.177	95.5774	90.9091	91.4005	90.4177	93.1204	94.1032	97.0516	100.491
	2	102.25	103	105	105.75	105.25	98.75	93.25	94.25	91.45	94	95.5	98.25	102.75
	3	99.7567	103.163	103.893	103.163	102.676	98.2968	94.4039	93.1873	90.7056	92.7007	93.4307	94.6472	98.5401
	4	103.893	104.623	104.623	104.38	102.433	99.0268	92.7007	92.4574	91.0462	93.1873	94.4039	95.3771	99.0268
	5	100.73	102.433	104.136	103.893	102.676	98.5401	95.6204	94.1606	91.8491	92.7007	93.4307	96.1071	99.2701
	6	103	104.5	105.75	104	103	99.25	94.75	93	94.825	94.5	95.75	98.5	101
HATFP	1	102.463	104.68	104.433	103.448	101.478	98.0296	93.1034	99.5074	99.7537	102.217	105.419	107.389	110.345
	2	104.798	103.535	105.808	104.545	104.798	98.4848	93.6869	100	101.01	105.556	107.828	110.101	113.131
	3	103.39	104.116	104.116	102.663	101.695	97.3366	92.0097	98.063	99.2736	102.663	105.569	107.748	108.959
	4	103.415	104.878	105.61	104.39	102.683	98.5366	93.6585	99.2683	99.7561	102.927	105.122	106.585	109.268
	5	103.125	104.327	103.365	102.644	101.442	98.0769	92.3077	97.8365	99.0385	103.606	107.692	107.212	109.856
	6	103.65	104.866	105.353	105.353	102.433	98.5401	91.9708	99.0268	100.487	101.46	106.569	108.029	111.192

## Sheet: DAI
Groups	Number	1d	2d	3d	4d	5d	6d	7d	8d	9d	10d	11d	12d	13d	14d
Normal	1	0	0	0	0	0	0	0	0	0	0	0	0	0	0
	2	0.333333	0	0	0	0	0	0	0	0	0	0	0	0	0
	3	0	0	0	0	0	0	0	0	0	0	0	0	0	0
	4	0.333333	0	0	0	0	0	0	0	0	0	0	0	0	0
	5	0	0	0	0	0	0	0	0	0	0	0	0	0	0
DSS	1	0	0	0	1	1.66667	3	3.66667	4	4	3.66667	3.66667	3.66667	3.66667	3.66667
	2	0	0.333333	0	0.666667	1.33333	2.66667	2.66667	3.33333	3.33333	3.66667	3.66667	3.66667	4	4
	3	0	0	0	1	2	3.33333	2.33333	2.33333	3.66667	4	4	4	4	4
	4	0	0.333333	0	0.666667	1.33333	2.66667	3.33333	4	4	3.33333	3.66667	3.66667	3.33333	3.66667
	5	0	0	0	1	1.33333	2.33333	2.33333	3	3	3.66667	3.66667	3.66667	3.66667	3.66667
SASP	1	0	0	0	0.666667	1	2.33333	3	3	3	3	2.66667	2	2	1.66667
	2	0	0.666667	0.666667	0.333333	2	3.33333	2.66667	3.66667	3	2.33333	2.33333	1.66667	1.33333	1.33333
	3	0	0.333333	0.333333	1	1	3	3.66667	3.66667	3.33333	3.33333	2.66667	2.33333	1.66667	1.33333
		0	0.333333	0.333333	1	2	2.33333	2.66667	3	3.33333	3	2.66667	2.33333	2	1.66667
		0	0.333333	0.333333	0.666667	0.666667	2.33333	2.66667	3	2.66667	2.33333	2.33333	2	1.66667	1
LATFP	1	0	0	0	0.333333	0.666667	3	3	3	3.33333	3.66667	2.66667	2.33333	2	2
	2	0	0.333333	0.333333	0.666667	2.33333	3	2.66667	3	3.66667	3.33333	3.33333	3	2.33333	2
	3	0	0	0.333333	0.333333	1.66667	2.66667	3.33333	3.33333	3.33333	3.33333	3	2	1.66667	1
		0	0.333333	0.333333	0.333333	0.666667	2.33333	2.66667	3	3	3	2.66667	2	2	1.66667
		0	0	0	0.333333	0.333333	2.66667	3.33333	3.66667	3.66667	3.33333	3	2.66667	2.33333	1.66667
HATFP	1	0	0	0	0.666667	2	2.33333	3	3.66667	3	3	2.66667	1.66667	1.33333	1.33333
	2	0	0.666667	0	0.333333	2	2.66667	2.66667	3	2.66667	3	2.33333	2	1.66667	1.33333
	3	0	0.666667	0.333333	1	2.33333	3	3.66667	3.66667	3	3	2.66667	2.66667	2.33333	2
		0	0.333333	0.333333	0.333333	1	2.66667	2.66667	3	3	2.66667	2.33333	2	1.66667	1.33333
		0	0.666667	0.666667	1	2.33333	2.66667	3	3	3.33333	3	2.66667	2	1.66667	1.33333

## Sheet: Colon length
Colon length
Groups	Number	length (cm)
Normal	1	10.3
	2	9.6
	3	10
	4	11.1
	5	9.2
	6	9
DSS	1	5.6
	2	7.2
	3	6.5
	4	5.7
	5	6.1
	6	6
SASP	1	7.5
	2	8
	3	7.4
	4	7.6						o
	5	7.9
LATFP	1	6.8
	2	8.1
	3	8.1
	4	7.8
	5	8.2
HATFP	1	10.5
	2	8.5
	3	11.3
	4	7.6
	5	10.1

## Sheet: Organ Index
Groups	Number	Weight	Spleen (g)	Thymus (g)	Spleen index	Thymus Index
Normal	1	47.4	0.1427	0.103	0.301055	0.2173
	2	48.7	0.1434	0.1038	0.294456	0.213142
	3	48.2	0.1403	0.1025	0.291079	0.212656
	4	47.7	0.1497	0.0768	0.313836	0.161006
	5	47.2	0.1308	0.1028	0.277119	0.217797
DSS	1	38.9	0.1689	0.0659	0.43419	0.169409
	2	37.9	0.1784	0.0527	0.470712	0.13905
	3	38.8	0.1617	0.0534	0.416753	0.137629
	4	39.7	0.1869	0.0506	0.470781	0.127456
	5	38.2	0.1797	0.0536	0.470419	0.140314
SASP	1	45.4	0.1499	0.0963	0.330176	0.212115
	2	45.4	0.158	0.0895	0.348018	0.197137
	3	45.6	0.1749	0.091	0.383553	0.199561
	4	45.8	0.1632	0.0933	0.356332	0.203712
	5	45.7	0.1738	0.089	0.380306	0.194748
LATFP	1	40.4	0.1465	0.0704	0.362624	0.174257
	2	40.8	0.172	0.0679	0.421569	0.166422
	3	40.9	0.1954	0.0665	0.477751	0.162592
	4	41.1	0.1909	0.069	0.464477	0.167883
	5	40.7	0.1407	0.0611	0.3457	0.150123
HATFP	1	45.7	0.1302	0.0966	0.284902	0.211379
	2	45	0.1552	0.0888	0.344889	0.197333
	3	44.8	0.1603	0.0964	0.357813	0.215179
	4	44.8	0.1581	0.0817	0.352902	0.182366
	5	45.7	0.1389	0.0849	0.303939	0.185777

## Sheet: Oxidative stress indicators
SOD				CAT				GSH-PX
Groups	Number	SOD activity (U/mg prot)		Groups	Number	CAT activity (U/mg prot)		Groups	Number	GSH-PX activity (U/mg prot)
Normal	1	30		Normal	1	0.612		Normal	1	0.612
	2	32.54			2	0.505			2	0.505
	3	38			3	0.591174			3	0.591174
	4	27.42			4	0.6315			4	0.6315
	5	29.53			5	0.6802			5	0.6802
DSS	1	14		DSS	1	0.377644		DSS	1	0.377644
	2	13.79			2	0.455011			2	0.455011
	3	16.2			3	0.322174			3	0.322174
	4	17.18			4	0.4218			4	0.4218
	5	11.88			5	0.3906			5	0.3906
SASP	1	21.51		SASP	1	0.605339		SASP	1	0.605339
	2	23.02			2	0.8273			2	0.8273
	3	28.31			3	0.766876			3	0.766876
	4	22.59			4	0.6542			4	0.6542
	5	26.4			5	0.7108			5	0.7108
LATFP	1	15.89		LATFP	1	0.49931		LATFP	1	0.49931
	2	15.91			2	0.505194			2	0.505194
	3	25.34			3	0.503917			3	0.503917
	4	15.7			4	0.5803			4	0.5803
	5	18.96			5	0.5328			5	0.5328
HATFP	1	24.29		HATFP	1	0.726907		HATFP	1	0.726907
	2	21.01			2	0.831364			2	0.831364
	3	25.95			3	0.78			3	0.78
	4	24.8			4	0.7328			4	0.7328
	5	29.13			5	0.7209			5	0.7209
MDA				MPO
Groups	Number	MDA content (nmol/mg prot)		Groups	Number	CAT activity (U/g)
Normal	1	0.519751		Normal	1	0.300885
	2	0.521858			2	0.424779
	3	0.554258			3	0.389381
	4	0.473604			4	0.389381
	5	0.647354			5	0.460177
DSS	1	0.95792		DSS	1	0.902655
	2	0.812979			2	0.920354
	3	1.0151			3	0.831858
	4	0.909491			4	1.06195
	5	1.14279			5	1.15044
SASP	1	0.595091		SASP	1	0.495575
	2	0.449452			2	0.60177
	3	0.419024			3	0.654867
	4	0.636251			4	0.477876
	5	0.553892			5	0.690265
LATFP	1	0.70807		LATFP	1	0.584071
	2	0.647354			2	0.530973
	3	0.60758			3	0.584071
	4	0.584782			4	0.548673
	5	0.667452			5	0.513274
HATFP	1	0.394411		HATFP	1	0.424779
	2	0.567199			2	0.477876
	3	0.496091			3	0.530973
	4	0.419024			4	0.460177
	5	0.522924			5	0.460177

## Sheet: ELISA
TNF-α				IL-1β
Groups	Number	TNF-α (pg/mL)		Groups	Number	IL-1β (pg/mL)
Normal	1	247.895		Normal	1	99.0476
	2	242.632			2	80
	3	253.158			3	80
	4	253.158			4	68.5714
	5	258.421			5	99.0476
DSS	1	311.053		DSS	1	213.333
	2	311.053			2	208.571
	3	300.526			3	184.762
	4	295.263			4	151.429
	5	300.526			5	160.952
SASP	1	274.211		SASP	1	127.619
	2	258.421			2	122.857
	3	247.895			3	113.333
	4	253.158			4	89.5238
	5	263.684			5	108.571
LATFP	1	268.947		LATFP	1	127.619
	2	268.947			2	122.857
	3	253.158			3	103.81
	4	258.421			4	137.143
	5	263.684			5	99.0476
HATFP	1	268.947		HATFP	1	80
	2	258.421			2	94.2857
	3	258.421			3	94.2857
	4	247.895			4	84.7619
	5	263.684			5	70.4762
IL-6				IL-10
Groups	Number	IL-6 (pg/mL)		Groups	Number	IL-10 (pg/mL)
Normal	1	62.3958		Normal	1	91.6667
	2	51.9792			2	87.5
	3	44.6875			3	100
	4	60.3125			4	108.333
	5	50.9375			5	104.167
DSS	1	101.979		DSS	1	45.8333
	2	94.6875			2	45.8333
	3	88.4375			3	45.8333
	4	95.7292			4	50
	5	113.438			5	58.3333
SASP	1	72.8125		SASP	1	83.3333
	2	54.0625			2	87.5
	3	65.5208			3	91.6667
	4	53.0208			4	95.8333
	5	65.5208			5	79.1667
LATFP	1	60.3125		LATFP	1	58.3333
	2	50.9375			2	66.6667
	3	68.6458			3	75
	4	58.2292			4	70.8333
	5	61.3542			5	62.5
HATFP	1	44.6875		HATFP	1	108.333
	2	43.6458			2	95.8333
	3	50.9375			3	108.333
	4	54.0625			4	91.6667
	5	49.8958			5	100

## Sheet: RT-qPCR
Group	Relative mRNA expression of TLR4	Relative mRNA expression of MyD88	Relative mRNA expression of NF-κB p65	Relative mRNA expression of IκBα
Normal1	0.870551	1.13761	1.03383	1.29415
Normal2	0.907519	0.956608	1.10803	1.04391
Normal3	0.913831	0.850274	0.869345	0.940826
Normal4	1.23971	0.880259	0.984866	0.934327
Normal5	1.11729	1.22774	1.0196	0.842063
DSS1	4.02782	3.42475	2.92411	0.222519
DSS2	3.78423	2.68701	2.08204	0.297714
DSS3	3.91768	2.98142	2.90392	0.213454
DSS4	3.65533	2.10818	2.23148	0.344363
DSS5	3.4822	3.3311	2.05338	0.222519
SASP1	1.23114	1.87384	0.816769	0.551717
SASP2	1.26576	1.48041	0.746389	0.567228
SASP3	0.864537	1.30677	1.00556	0.647073
SASP4	0.888843	1.64262	0.845572	0.56331
SASP5	0.952638	1.09126	0.906262	0.674551
LATFP1	1.43396	1.47019	1.63354	0.390123
LATFP2	1.00696	1.63127	1.32685	0.435879
LATFP3	1.38511	1.93992	1.99723	0.49039
LATFP4	0.852635	2.0648	1.31768	0.369079
LATFP5	1.21419	2.45547	1.71475	0.39832
HATFP1	0.732043	1.01819	0.906262	0.40388
HATFP2	1.04972	1.42011	0.984866	0.547906
HATFP3	1.47427	1.88688	0.741234	0.579146
HATFP4	0.726986	0.943438	1.0629	0.473685
HATFP5	0.76313	1.42998	0.857376	0.575146
