# Supplementary material for: A polysaccharide from Allium tenuissimum L. flowers relieves ulcerative colitis by regulating the inflammatory signaling pathway and gut microbiota
Source: Royal Society of Chemistry journal article supplement (doi:10.1039/d3fo01253k), 2023-01-01
Supplement: d3fo01253k2.pdf [file d3fo01253k2.pdf]

## Electronic Supplementary Information

### Abbreviations

|                       |                                                          |
|-----------------------|----------------------------------------------------------|
| IBD                   | Inflammatory bowel disease                               |
| UC                    | Ulcerative colitis                                       |
| CD                    | Crohn disease                                            |
| cATFP                 | Crude <i>Allium tenuissimum</i> L. flower polysaccharide |
| KBr                   | Potassium bromide                                        |
| TFA                   | Trifluoroacetic acid                                     |
| Fuc                   | Fucose                                                   |
| Rha                   | Rhamnose                                                 |
| Ara                   | Arabinose                                                |
| Gal                   | Galactose                                                |
| Glc                   | Glucose                                                  |
| Xyl                   | Xylose                                                   |
| Man                   | Mannose                                                  |
| GalA                  | Galacturonic acid                                        |
| Glca                  | Glucuronic acid                                          |
| DSS                   | Dextran sulfate sodium                                   |
| SASP                  | Sulfasalazine                                            |
| DAI                   | Disease activity index                                   |
| SOD                   | Super oxide dismutase                                    |
| CAT                   | Catalase                                                 |
| GSH-PX                | Glutathione peroxidase                                   |
| MDA                   | Malondialdehyde                                          |
| MPO                   | Myeloperoxidase                                          |
| TNF- $\alpha$         | Tumor necrosis factor- $\alpha$                          |
| IL-6                  | Interleukin-6                                            |
| IL-1 $\beta$          | Interleukin-1beta                                        |
| IL-10                 | Interleukin-10                                           |
| TLR                   | Toll-like receptor                                       |
| MyD88                 | Myeloid differentiation factor 88                        |
| NF- $\kappa$ B        | Nuclear factor-kappa B                                   |
| I $\kappa$ B $\alpha$ | Inhibitor kappa B alpha                                  |
| GAPDH                 | Glyceraldehyde-3-phosphate dehydrogenase                 |

## Highlights

- ATFP is characterized as an acidic polysaccharide composed mainly of Gal, Xyl and Ara.
- ATFP reduces oxidative stress state and regulates inflammatory cytokine levels in colitis mice.
- ATFP inhibits the overexpression of TLR4/MyD88/NF- $\kappa$ B signaling pathway.
- ATFP positively regulates gut microbiota.
- ATFP increases the abundance of bacteria that produce short chain fatty acids.

**Table 1 Real-time PCR primer sequences**

| Gene name | Forward (5'-3')            | Reverse (3'-5')             |
|-----------|----------------------------|-----------------------------|
| GAPDH     | 5'-GGTTGTCTCCTGCGACTTCA-3' | 5'-TGGTCCAGGGTTTCTTACTCC-3' |
| TLR4      | 5'-TGGCTGGTTTACACGTCCAT-3' | 5'-TGCAGAAACATTGCGCAAGC-3'  |
| MyD88     | 5'-ACTGGCCTGAGCAACTAGGA-3' | 5'-CGTGCCACTACCTGTAGCAA-3'  |
| NF-κB p65 | 5'-CACCGGATTGAAGAGAAGCG-3' | 5'-AAGTTGATGGTGCTGAGGGA-3'  |
| IκBα      | 5'-GAGGCCAGCGTCTGACATTA-3' | 5'-CAGCCGAATCACCCCAGTAA-3'  |

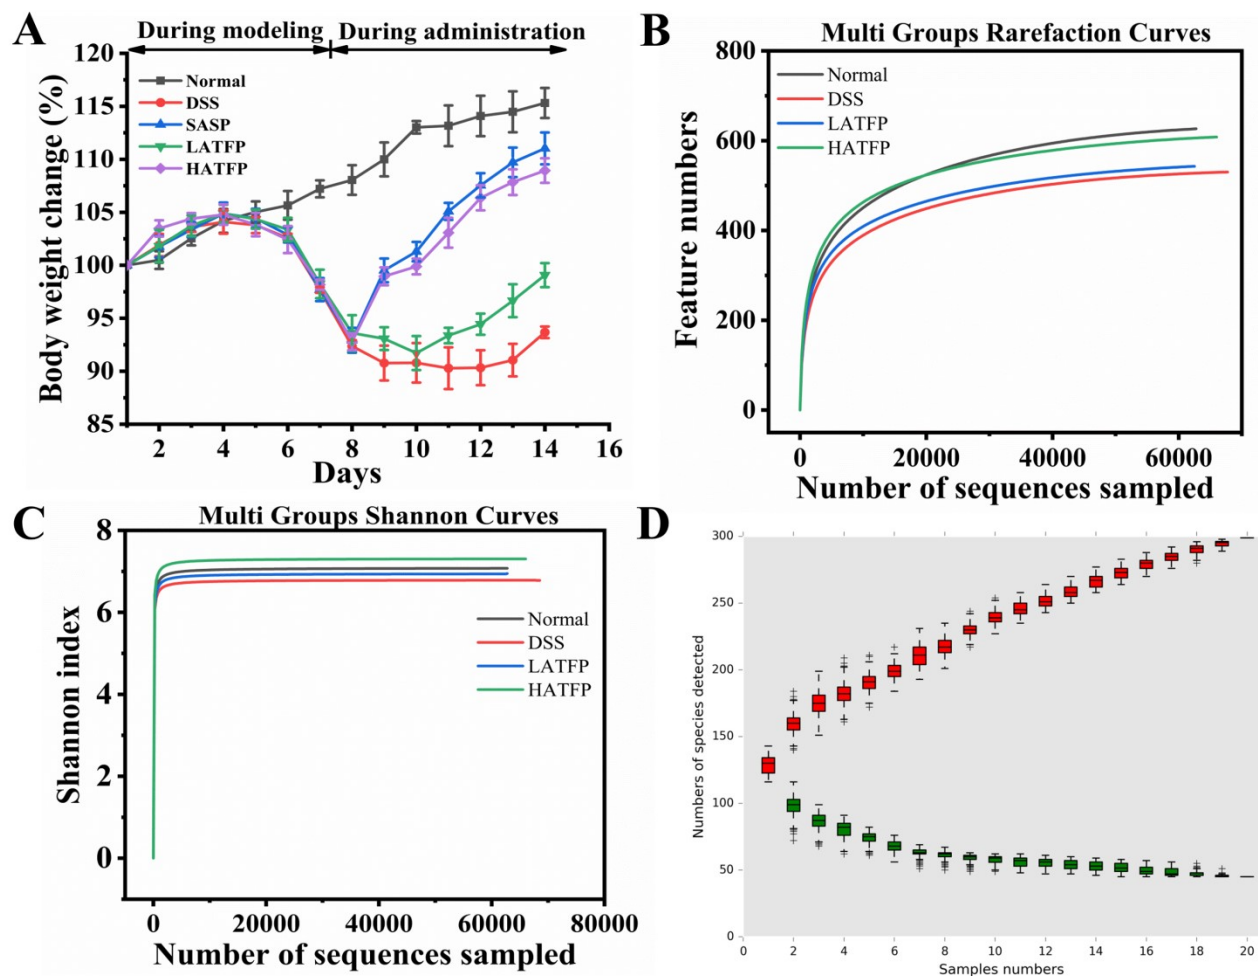

**Fig. 1** Effects of ATFP on body weight and diversity of gut microbiota in mice. (A) Changes relative to the initial body weight of the mice. (B) Rarefaction curves. (C) Shannon curves. (D) Species accumulation curve at genus level. The experimental data were obtained from five mice in each group.

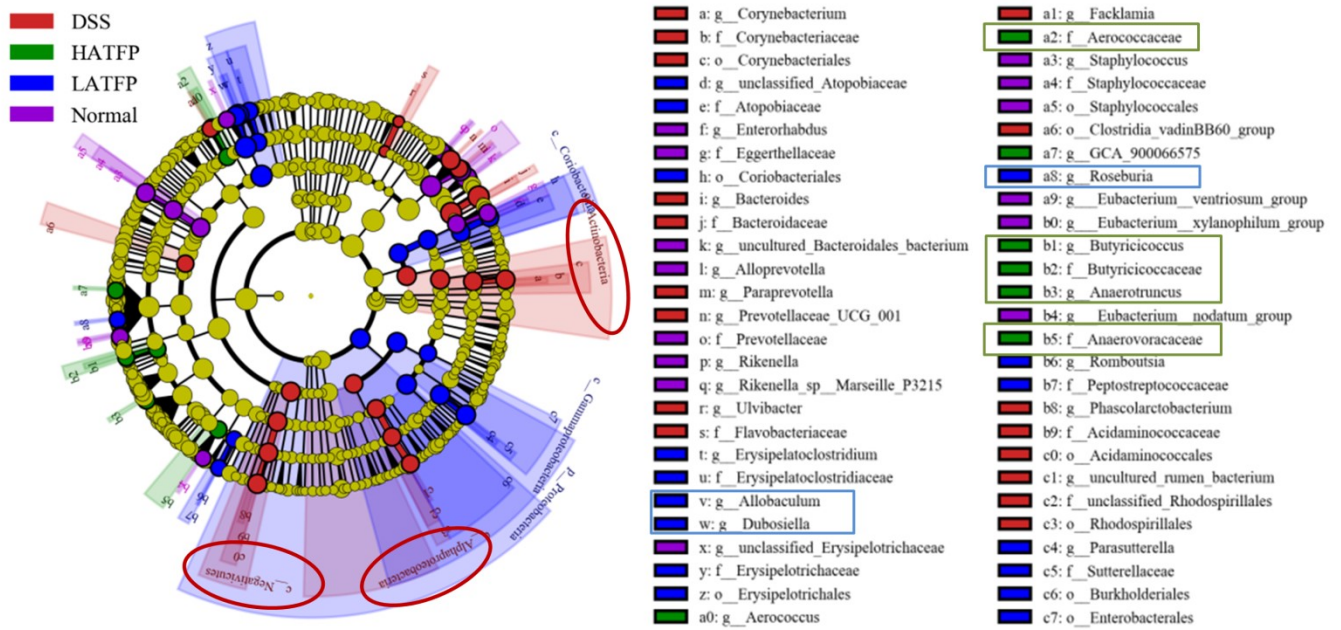

**Fig. 2** The LEfSe analysis of cladistic evolution at phylum to genus level. Different colors represent different groups, and nodes of different colors represent the marker species in each group.
