# Supplementary material for: A polysaccharide from Allium tenuissimum L. flowers relieves ulcerative colitis by regulating the inflammatory signaling pathway and gut microbiota
Source: Royal Society of Chemistry journal article supplement (doi:10.1039/d3fo01253k), 2023-01-01
Supplement: d3fo01253k3.xlsx [file d3fo01253k3.xlsx]

## Sheet: alpha_diversity
Sample ID	ACE	Chao1	Simpson	Shannon	PD_whole_tree	Feature
Normal1	689.167	676.561	0.9807	7.1449	43.4932	671
Normal2	715.638	702.184	0.9881	7.3237	42.382	693
Normal3	617.393	605.429	0.983	6.9336	40.976	601
Normal4	645.986	632.409	0.9845	7.237	41.0818	627
DSS1	535.21	528.457	0.9799	6.7064	40.7234	526
DSS2	516.33	509.719	0.9802	6.6706	37.4617	508
DSS3	552.452	542.549	0.984	6.9149	36.9229	536
DSS4	542.302	534.344	0.9777	6.6914	35.7975	528
LATFP1	521.505	510.5	0.9815	6.7577	46.3919	502
LATFP2	654.001	643.677	0.9851	7.2972	44.1449	639
LATFP3	635.709	624.889	0.9876	7.4249	46.3244	618
LATFP4	620.661	607.641	0.9787	6.8955	38.9626	600
HATFP1	648.048	640.642	0.9889	7.4662	41.4047	635
HATFP2	596.702	586.397	0.988	7.2653	44.2887	580
HATFP3	690.878	676.647	0.9865	7.4135	45.3559	667
HATFP4	645.47	628.897	0.9905	7.5486	49.0012	613

## Sheet: rarefaction_curve_data
sample	numsampled	Value
Normal1	0	0
Normal1	250	118.062
Normal1	500	175.04
Normal1	750	213.032
Normal1	1000	241.666
Normal1	1250	264.238
Normal1	1500	282.738
Normal1	1750	299.108
Normal1	2000	313.24
Normal1	2250	326.02
Normal1	2500	336.98
Normal1	2750	347.148
Normal1	3000	356.406
Normal1	3250	364.98
Normal1	3500	372.796
Normal1	3750	380.114
Normal1	4000	386.824
Normal1	4250	393.436
Normal1	4500	399.46
Normal1	4750	405.358
Normal1	5000	410.868
Normal1	5250	416.358
Normal1	5500	421.39
Normal1	5750	426.09
Normal1	6000	430.524
Normal1	6250	434.902
Normal1	6500	439.146
Normal1	6750	443.268
Normal1	7000	447.084
Normal1	7250	450.894
Normal1	7500	454.42
Normal1	7750	458.134
Normal1	8000	461.508
Normal1	8250	464.756
Normal1	8500	468.046
Normal1	8750	471.246
Normal1	9000	474.29
Normal1	9250	477.326
Normal1	9500	480.324
Normal1	9750	483.088
Normal1	10000	485.94
Normal1	10250	488.71
Normal1	10500	491.298
Normal1	10750	493.818
Normal1	11000	496.442
Normal1	11250	499.028
Normal1	11500	501.44
Normal1	11750	503.818
Normal1	12000	506.188
Normal1	12250	508.47
Normal1	12500	510.598
Normal1	12750	512.744
Normal1	13000	514.904
Normal1	13250	517.026
Normal1	13500	519.096
Normal1	13750	521.114
Normal1	14000	523.108
Normal1	14250	525.088
Normal1	14500	526.96
Normal1	14750	528.94
Normal1	15000	530.684
Normal1	15250	532.712
Normal1	15500	534.464
Normal1	15750	536.29
Normal1	16000	538.206
Normal1	16250	539.854
Normal1	16500	541.604
Normal1	16750	543.288
Normal1	17000	544.934
Normal1	17250	546.522
Normal1	17500	548.062
Normal1	17750	549.642
Normal1	18000	551.2
Normal1	18250	552.63
Normal1	18500	554.11
Normal1	18750	555.562
Normal1	19000	557.038
Normal1	19250	558.432
Normal1	19500	559.824
Normal1	19750	561.248
Normal1	20000	562.666
Normal1	20250	564.03
Normal1	20500	565.368
Normal1	20750	566.642
Normal1	21000	567.946
Normal1	21250	569.124
Normal1	21500	570.398
Normal1	21750	571.666
Normal1	22000	572.866
Normal1	22250	574.114
Normal1	22500	575.25
Normal1	22750	576.436
Normal1	23000	577.62
Normal1	23250	578.836
Normal1	23500	580.106
Normal1	23750	581.234
Normal1	24000	582.378
Normal1	24250	583.524
Normal1	24500	584.5
Normal1	24750	585.544
Normal1	25000	586.588
Normal1	25250	587.658
Normal1	25500	588.68
Normal1	25750	589.714
Normal1	26000	590.75
Normal1	26250	591.768
Normal1	26500	592.788
Normal1	26750	593.808
Normal1	27000	594.776
Normal1	27250	595.762
Normal1	27500	596.768
Normal1	27750	597.728
Normal1	28000	598.614
Normal1	28250	599.57
Normal1	28500	600.512
Normal1	28750	601.35
Normal1	29000	602.246
Normal1	29250	603.178
Normal1	29500	604.104
Normal1	29750	604.966
Normal1	30000	605.9
Normal1	30250	606.71
Normal1	30500	607.546
Normal1	30750	608.38
Normal1	31000	609.23
Normal1	31250	610.056
Normal1	31500	610.916
Normal1	31750	611.746
Normal1	32000	612.582
Normal1	32250	613.334
Normal1	32500	614.132
Normal1	32750	614.908
Normal1	33000	615.648
Normal1	33250	616.396
Normal1	33500	617.124
Normal1	33750	617.828
Normal1	34000	618.59
Normal1	34250	619.28
Normal1	34500	619.982
Normal1	34750	620.674
Normal1	35000	621.41
Normal1	35250	622.062
Normal1	35500	622.8
Normal1	35750	623.444
Normal1	36000	624.16
Normal1	36250	624.886
Normal1	36500	625.572
Normal1	36750	626.252
Normal1	37000	626.9
Normal1	37250	627.51
Normal1	37500	628.116
Normal1	37750	628.714
Normal1	38000	629.318
Normal1	38250	629.952
Normal1	38500	630.58
Normal1	38750	631.234
Normal1	39000	631.848
Normal1	39250	632.478
Normal1	39500	633.056
Normal1	39750	633.65
Normal1	40000	634.22
Normal1	40250	634.816
Normal1	40500	635.356
Normal1	40750	635.9
Normal1	41000	636.45
Normal1	41250	636.99
Normal1	41500	637.556
Normal1	41750	638.042
Normal1	42000	638.584
Normal1	42250	639.166
Normal1	42500	639.744
Normal1	42750	640.278
Normal1	43000	640.78
Normal1	43250	641.338
Normal1	43500	641.802
Normal1	43750	642.28
Normal1	44000	642.818
Normal1	44250	643.302
Normal1	44500	643.756
Normal1	44750	644.224
Normal1	45000	644.694
Normal1	45250	645.152
Normal1	45500	645.578
Normal1	45750	646.046
Normal1	46000	646.506
Normal1	46250	646.978
Normal1	46500	647.43
Normal1	46750	647.848
Normal1	47000	648.278
Normal1	47250	648.684
Normal1	47500	649.116
Normal1	47750	649.56
Normal1	48000	649.998
Normal1	48250	650.438
Normal1	48500	650.818
Normal1	48750	651.224
Normal1	49000	651.618
Normal1	49250	651.998
Normal1	49500	652.416
Normal1	49750	652.79
Normal1	50000	653.146
Normal1	50250	653.546
Normal1	50500	653.974
Normal1	50750	654.388
Normal1	51000	654.756
Normal1	51250	655.114
Normal1	51500	655.444
Normal1	51750	655.814
Normal1	52000	656.192
Normal1	52250	656.534
Normal1	52500	656.912
Normal1	52750	657.238
Normal1	53000	657.594
Normal1	53250	657.88
Normal1	53500	658.216
Normal1	53750	658.538
Normal1	54000	658.848
Normal1	54250	659.16
Normal1	54500	659.492
Normal1	54750	659.792
Normal1	55000	660.07
Normal1	55250	660.39
Normal1	55500	660.67
Normal1	55750	660.988
Normal1	56000	661.262
Normal1	56250	661.506
Normal1	56500	661.794
Normal1	56750	662.068
Normal1	57000	662.328
Normal1	57250	662.584
Normal1	57500	662.874
Normal1	57750	663.138
Normal1	58000	663.39
Normal1	58250	663.656
Normal1	58500	663.892
Normal1	58750	664.078
Normal1	59000	664.324
Normal1	59250	664.57
Normal1	59500	664.806
Normal1	59750	665.054
Normal1	60000	665.338
Normal1	60250	665.582
Normal1	60500	665.822
Normal1	60750	666.018
Normal1	61000	666.278
Normal1	61250	666.482
Normal1	61500	666.716
Normal1	61750	666.908
Normal1	62000	667.104
Normal1	62250	667.33
Normal1	62500	667.554
Normal1	62750	667.738
Normal1	63000	667.952
Normal1	63250	668.132
Normal1	63500	668.282
Normal1	63750	668.45
Normal1	64000	668.646
Normal1	64250	668.804
Normal1	64500	668.964
Normal1	64750	669.162
Normal1	65000	669.316
Normal1	65250	669.476
Normal1	65500	669.646
Normal1	65750	669.798
Normal1	66000	669.924
Normal1	66250	670.084
Normal1	66500	670.206
Normal1	66750	670.346
Normal1	67000	670.498
Normal1	67250	670.632
Normal1	67500	670.75
Normal1	67750	670.894
Normal2	0	0
Normal2	250	118.306
Normal2	500	170.25
Normal2	750	206
Normal2	1000	234.024
Normal2	1250	256.99
Normal2	1500	276.362
Normal2	1750	293.454
Normal2	2000	308.768
Normal2	2250	322.552
Normal2	2500	334.896
Normal2	2750	346.128
Normal2	3000	356.35
Normal2	3250	365.836
Normal2	3500	374.492
Normal2	3750	382.664
Normal2	4000	390.368
Normal2	4250	397.492
Normal2	4500	404.312
Normal2	4750	410.724
Normal2	5000	416.858
Normal2	5250	422.568
Normal2	5500	428.06
Normal2	5750	433.598
Normal2	6000	438.632
Normal2	6250	443.4
Normal2	6500	447.818
Normal2	6750	452.376
Normal2	7000	456.604
Normal2	7250	460.54
Normal2	7500	464.506
Normal2	7750	468.256
Normal2	8000	471.978
Normal2	8250	475.53
Normal2	8500	479.122
Normal2	8750	482.482
Normal2	9000	485.726
Normal2	9250	488.884
Normal2	9500	492.012
Normal2	9750	495.134
Normal2	10000	498.132
Normal2	10250	501.03
Normal2	10500	503.816
Normal2	10750	506.516
Normal2	11000	509.238
Normal2	11250	511.854
Normal2	11500	514.428
Normal2	11750	516.914
Normal2	12000	519.376
Normal2	12250	521.864
Normal2	12500	524.226
Normal2	12750	526.514
Normal2	13000	528.73
Normal2	13250	530.868
Normal2	13500	533.006
Normal2	13750	535.156
Normal2	14000	537.176
Normal2	14250	539.248
Normal2	14500	541.214
Normal2	14750	543.112
Normal2	15000	545.036
Normal2	15250	546.85
Normal2	15500	548.566
Normal2	15750	550.42
Normal2	16000	552.27
Normal2	16250	554.13
Normal2	16500	555.97
Normal2	16750	557.688
Normal2	17000	559.408
Normal2	17250	561.104
Normal2	17500	562.792
Normal2	17750	564.436
Normal2	18000	565.952
Normal2	18250	567.478
Normal2	18500	568.99
Normal2	18750	570.698
Normal2	19000	572.232
Normal2	19250	573.674
Normal2	19500	575.15
Normal2	19750	576.572
Normal2	20000	577.964
Normal2	20250	579.408
Normal2	20500	580.808
Normal2	20750	582.152
Normal2	21000	583.538
Normal2	21250	584.84
Normal2	21500	586.154
Normal2	21750	587.46
Normal2	22000	588.802
Normal2	22250	590.016
Normal2	22500	591.224
Normal2	22750	592.42
Normal2	23000	593.672
Normal2	23250	594.926
Normal2	23500	596.146
Normal2	23750	597.312
Normal2	24000	598.456
Normal2	24250	599.57
Normal2	24500	600.72
Normal2	24750	601.852
Normal2	25000	602.974
Normal2	25250	604.12
Normal2	25500	605.21
Normal2	25750	606.366
Normal2	26000	607.494
Normal2	26250	608.586
Normal2	26500	609.668
Normal2	26750	610.684
Normal2	27000	611.696
Normal2	27250	612.616
Normal2	27500	613.57
Normal2	27750	614.556
Normal2	28000	615.468
Normal2	28250	616.476
Normal2	28500	617.438
Normal2	28750	618.434
Normal2	29000	619.442
Normal2	29250	620.374
Normal2	29500	621.316
Normal2	29750	622.158
Normal2	30000	623.136
Normal2	30250	624.002
Normal2	30500	624.896
Normal2	30750	625.784
Normal2	31000	626.596
Normal2	31250	627.438
Normal2	31500	628.346
Normal2	31750	629.21
Normal2	32000	630.008
Normal2	32250	630.834
Normal2	32500	631.64
Normal2	32750	632.432
Normal2	33000	633.256
Normal2	33250	634.05
Normal2	33500	634.792
Normal2	33750	635.596
Normal2	34000	636.368
Normal2	34250	637.164
Normal2	34500	637.92
Normal2	34750	638.722
Normal2	35000	639.466
Normal2	35250	640.23
Normal2	35500	640.946
Normal2	35750	641.66
Normal2	36000	642.338
Normal2	36250	642.98
Normal2	36500	643.724
Normal2	36750	644.378
Normal2	37000	645.11
Normal2	37250	645.708
Normal2	37500	646.382
Normal2	37750	647.006
Normal2	38000	647.67
Normal2	38250	648.322
Normal2	38500	648.948
Normal2	38750	649.636
Normal2	39000	650.298
Normal2	39250	650.97
Normal2	39500	651.57
Normal2	39750	652.206
Normal2	40000	652.834
Normal2	40250	653.412
Normal2	40500	653.978
Normal2	40750	654.566
Normal2	41000	655.154
Normal2	41250	655.754
Normal2	41500	656.384
Normal2	41750	656.934
Normal2	42000	657.516
Normal2	42250	658.066
Normal2	42500	658.578
Normal2	42750	659.114
Normal2	43000	659.692
Normal2	43250	660.228
Normal2	43500	660.748
Normal2	43750	661.266
Normal2	44000	661.812
Normal2	44250	662.322
Normal2	44500	662.802
Normal2	44750	663.3
Normal2	45000	663.81
Normal2	45250	664.312
Normal2	45500	664.788
Normal2	45750	665.26
Normal2	46000	665.758
Normal2	46250	666.258
Normal2	46500	666.744
Normal2	46750	667.234
Normal2	47000	667.706
Normal2	47250	668.146
Normal2	47500	668.526
Normal2	47750	669.018
Normal2	48000	669.522
Normal2	48250	669.99
Normal2	48500	670.458
Normal2	48750	670.924
Normal2	49000	671.384
Normal2	49250	671.842
Normal2	49500	672.244
Normal2	49750	672.632
Normal2	50000	673.028
Normal2	50250	673.446
Normal2	50500	673.82
Normal2	50750	674.216
Normal2	51000	674.564
Normal2	51250	674.956
Normal2	51500	675.356
Normal2	51750	675.722
Normal2	52000	676.084
Normal2	52250	676.468
Normal2	52500	676.866
Normal2	52750	677.206
Normal2	53000	677.588
Normal2	53250	677.968
Normal2	53500	678.358
Normal2	53750	678.716
Normal2	54000	679.078
Normal2	54250	679.446
Normal2	54500	679.76
Normal2	54750	680.058
Normal2	55000	680.386
Normal2	55250	680.748
Normal2	55500	681.016
Normal2	55750	681.374
Normal2	56000	681.69
Normal2	56250	682.008
Normal2	56500	682.316
Normal2	56750	682.65
Normal2	57000	682.914
Normal2	57250	683.18
Normal2	57500	683.486
Normal2	57750	683.768
Normal2	58000	684.046
Normal2	58250	684.348
Normal2	58500	684.64
Normal2	58750	684.948
Normal2	59000	685.184
Normal2	59250	685.452
Normal2	59500	685.732
Normal2	59750	686.034
Normal2	60000	686.342
Normal2	60250	686.622
Normal2	60500	686.882
Normal2	60750	687.112
Normal2	61000	687.36
Normal2	61250	687.596
Normal2	61500	687.816
Normal2	61750	688.04
Normal2	62000	688.248
Normal2	62250	688.434
Normal2	62500	688.612
Normal2	62750	688.86
Normal2	63000	689.084
Normal2	63250	689.296
Normal2	63500	689.496
Normal2	63750	689.662
Normal2	64000	689.902
Normal2	64250	690.09
Normal2	64500	690.316
Normal2	64750	690.504
Normal2	65000	690.726
Normal2	65250	690.916
Normal2	65500	691.086
Normal2	65750	691.28
Normal2	66000	691.466
Normal2	66250	691.642
Normal2	66500	691.77
Normal2	66750	691.942
Normal2	67000	692.154
Normal2	67250	692.304
Normal2	67500	692.48
Normal2	67750	692.646
Normal2	68000	692.82
Normal3	0	0
Normal3	250	106.192
Normal3	500	151.144
Normal3	750	181.212
Normal3	1000	203.582
Normal3	1250	222.18
Normal3	1500	237.718
Normal3	1750	250.89
Normal3	2000	262.674
Normal3	2250	273.102
Normal3	2500	282.812
Normal3	2750	291.554
Normal3	3000	299.82
Normal3	3250	307.276
Normal3	3500	314.396
Normal3	3750	321.006
Normal3	4000	327.046
Normal3	4250	332.868
Normal3	4500	338.384
Normal3	4750	343.59
Normal3	5000	348.662
Normal3	5250	353.37
Normal3	5500	357.954
Normal3	5750	362.302
Normal3	6000	366.522
Normal3	6250	370.576
Normal3	6500	374.65
Normal3	6750	378.456
Normal3	7000	381.99
Normal3	7250	385.636
Normal3	7500	389.148
Normal3	7750	392.366
Normal3	8000	395.568
Normal3	8250	398.628
Normal3	8500	401.658
Normal3	8750	404.554
Normal3	9000	407.416
Normal3	9250	410.122
Normal3	9500	412.802
Normal3	9750	415.656
Normal3	10000	418.18
Normal3	10250	420.736
Normal3	10500	423.178
Normal3	10750	425.568
Normal3	11000	427.974
Normal3	11250	430.294
Normal3	11500	432.58
Normal3	11750	434.776
Normal3	12000	437.032
Normal3	12250	439.078
Normal3	12500	441.15
Normal3	12750	443.21
Normal3	13000	445.256
Normal3	13250	447.254
Normal3	13500	449.186
Normal3	13750	451.164
Normal3	14000	453.178
Normal3	14250	455.06
Normal3	14500	456.93
Normal3	14750	458.806
Normal3	15000	460.586
Normal3	15250	462.41
Normal3	15500	464.078
Normal3	15750	465.654
Normal3	16000	467.328
Normal3	16250	468.996
Normal3	16500	470.7
Normal3	16750	472.318
Normal3	17000	473.834
Normal3	17250	475.368
Normal3	17500	476.92
Normal3	17750	478.454
Normal3	18000	479.896
Normal3	18250	481.394
Normal3	18500	482.914
Normal3	18750	484.372
Normal3	19000	485.872
Normal3	19250	487.186
Normal3	19500	488.55
Normal3	19750	489.854
Normal3	20000	491.212
Normal3	20250	492.446
Normal3	20500	493.782
Normal3	20750	495.068
Normal3	21000	496.4
Normal3	21250	497.708
Normal3	21500	499.024
Normal3	21750	500.346
Normal3	22000	501.662
Normal3	22250	502.938
Normal3	22500	504.1
Normal3	22750	505.262
Normal3	23000	506.324
Normal3	23250	507.438
Normal3	23500	508.568
Normal3	23750	509.718
Normal3	24000	510.914
Normal3	24250	512.036
Normal3	24500	513.28
Normal3	24750	514.452
Normal3	25000	515.486
Normal3	25250	516.586
Normal3	25500	517.652
Normal3	25750	518.676
Normal3	26000	519.698
Normal3	26250	520.636
Normal3	26500	521.68
Normal3	26750	522.714
Normal3	27000	523.706
Normal3	27250	524.71
Normal3	27500	525.712
Normal3	27750	526.676
Normal3	28000	527.65
Normal3	28250	528.554
Normal3	28500	529.526
Normal3	28750	530.49
Normal3	29000	531.486
Normal3	29250	532.438
Normal3	29500	533.39
Normal3	29750	534.218
Normal3	30000	535.114
Normal3	30250	536.004
Normal3	30500	536.942
Normal3	30750	537.788
Normal3	31000	538.706
Normal3	31250	539.548
Normal3	31500	540.37
Normal3	31750	541.26
Normal3	32000	542.016
Normal3	32250	542.784
Normal3	32500	543.502
Normal3	32750	544.314
Normal3	33000	545.11
Normal3	33250	545.876
Normal3	33500	546.658
Normal3	33750	547.46
Normal3	34000	548.172
Normal3	34250	548.864
Normal3	34500	549.582
Normal3	34750	550.308
Normal3	35000	551.056
Normal3	35250	551.822
Normal3	35500	552.546
Normal3	35750	553.18
Normal3	36000	553.928
Normal3	36250	554.574
Normal3	36500	555.258
Normal3	36750	555.928
Normal3	37000	556.614
Normal3	37250	557.298
Normal3	37500	558.038
Normal3	37750	558.652
Normal3	38000	559.292
Normal3	38250	559.964
Normal3	38500	560.588
Normal3	38750	561.15
Normal3	39000	561.77
Normal3	39250	562.394
Normal3	39500	562.984
Normal3	39750	563.548
Normal3	40000	564.18
Normal3	40250	564.718
Normal3	40500	565.318
Normal3	40750	565.928
Normal3	41000	566.586
Normal3	41250	567.166
Normal3	41500	567.738
Normal3	41750	568.338
Normal3	42000	568.922
Normal3	42250	569.428
Normal3	42500	569.974
Normal3	42750	570.528
Normal3	43000	571.048
Normal3	43250	571.604
Normal3	43500	572.116
Normal3	43750	572.59
Normal3	44000	573.11
Normal3	44250	573.614
Normal3	44500	574.088
Normal3	44750	574.622
Normal3	45000	575.086
Normal3	45250	575.514
Normal3	45500	575.968
Normal3	45750	576.434
Normal3	46000	576.924
Normal3	46250	577.32
Normal3	46500	577.764
Normal3	46750	578.216
Normal3	47000	578.678
Normal3	47250	579.134
Normal3	47500	579.594
Normal3	47750	580.03
Normal3	48000	580.472
Normal3	48250	580.878
Normal3	48500	581.264
Normal3	48750	581.642
Normal3	49000	582.06
Normal3	49250	582.438
Normal3	49500	582.788
Normal3	49750	583.242
Normal3	50000	583.626
Normal3	50250	584.026
Normal3	50500	584.426
Normal3	50750	584.832
Normal3	51000	585.166
Normal3	51250	585.526
Normal3	51500	585.9
Normal3	51750	586.224
Normal3	52000	586.586
Normal3	52250	586.944
Normal3	52500	587.274
Normal3	52750	587.64
Normal3	53000	587.978
Normal3	53250	588.338
Normal3	53500	588.66
Normal3	53750	588.934
Normal3	54000	589.226
Normal3	54250	589.572
Normal3	54500	589.84
Normal3	54750	590.126
Normal3	55000	590.456
Normal3	55250	590.718
Normal3	55500	591.062
Normal3	55750	591.362
Normal3	56000	591.64
Normal3	56250	591.922
Normal3	56500	592.188
Normal3	56750	592.496
Normal3	57000	592.754
Normal3	57250	592.992
Normal3	57500	593.3
Normal3	57750	593.536
Normal3	58000	593.784
Normal3	58250	594.07
Normal3	58500	594.332
Normal3	58750	594.552
Normal3	59000	594.756
Normal3	59250	594.944
Normal3	59500	595.146
Normal3	59750	595.382
Normal3	60000	595.656
Normal3	60250	595.854
Normal3	60500	596.054
Normal3	60750	596.258
Normal3	61000	596.47
Normal3	61250	596.676
Normal3	61500	596.864
Normal3	61750	597.1
Normal3	62000	597.28
Normal3	62250	597.46
Normal3	62500	597.656
Normal3	62750	597.894
Normal3	63000	598.064
Normal3	63250	598.226
Normal3	63500	598.422
Normal3	63750	598.6
Normal3	64000	598.808
Normal3	64250	598.956
Normal3	64500	599.108
Normal3	64750	599.246
Normal3	65000	599.398
Normal3	65250	599.566
Normal3	65500	599.674
Normal3	65750	599.806
Normal3	66000	599.948
Normal3	66250	600.06
Normal3	66500	600.206
Normal3	66750	600.348
Normal3	67000	600.472
Normal3	67250	600.594
Normal3	67500	600.706
Normal3	67750	600.814
Normal3	68000	600.918
Normal4	0	0
Normal4	250	103.32
Normal4	500	146.902
Normal4	750	175.6
Normal4	1000	197.598
Normal4	1250	215.32
Normal4	1500	230.03
Normal4	1750	242.738
Normal4	2000	254.184
Normal4	2250	264.334
Normal4	2500	273.288
Normal4	2750	281.786
Normal4	3000	289.09
Normal4	3250	296.068
Normal4	3500	302.54
Normal4	3750	308.378
Normal4	4000	313.998
Normal4	4250	319.316
Normal4	4500	324.466
Normal4	4750	329.286
Normal4	5000	333.89
Normal4	5250	338.238
Normal4	5500	342.384
Normal4	5750	346.254
Normal4	6000	350.114
Normal4	6250	353.716
Normal4	6500	357.362
Normal4	6750	360.774
Normal4	7000	363.952
Normal4	7250	367.108
Normal4	7500	370.274
Normal4	7750	373.284
Normal4	8000	376.19
Normal4	8250	378.956
Normal4	8500	381.758
Normal4	8750	384.422
Normal4	9000	386.86
Normal4	9250	389.358
Normal4	9500	391.928
Normal4	9750	394.318
Normal4	10000	396.73
Normal4	10250	398.938
Normal4	10500	401.31
Normal4	10750	403.456
Normal4	11000	405.584
Normal4	11250	407.624
Normal4	11500	409.612
Normal4	11750	411.6
Normal4	12000	413.492
Normal4	12250	415.498
Normal4	12500	417.348
Normal4	12750	419.2
Normal4	13000	421.048
Normal4	13250	422.956
Normal4	13500	424.722
Normal4	13750	426.444
Normal4	14000	428.082
Normal4	14250	429.772
Normal4	14500	431.438
Normal4	14750	432.978
Normal4	15000	434.522
Normal4	15250	436.004
Normal4	15500	437.528
Normal4	15750	439.048
Normal4	16000	440.548
Normal4	16250	442.004
Normal4	16500	443.304
Normal4	16750	444.632
Normal4	17000	446.06
Normal4	17250	447.4
Normal4	17500	448.736
Normal4	17750	450.088
Normal4	18000	451.376
Normal4	18250	452.674
Normal4	18500	453.98
Normal4	18750	455.3
Normal4	19000	456.556
Normal4	19250	457.796
Normal4	19500	458.992
Normal4	19750	460.26
Normal4	20000	461.444
Normal4	20250	462.56
Normal4	20500	463.616
Normal4	20750	464.748
Normal4	21000	465.87
Normal4	21250	466.866
Normal4	21500	468.072
Normal4	21750	469.044
Normal4	22000	470.13
Normal4	22250	471.122
Normal4	22500	472.148
Normal4	22750	473.152
Normal4	23000	474.192
Normal4	23250	475.182
Normal4	23500	476.138
Normal4	23750	477.014
Normal4	24000	477.954
Normal4	24250	478.918
Normal4	24500	479.84
Normal4	24750	480.726
Normal4	25000	481.598
Normal4	25250	482.56
Normal4	25500	483.444
Normal4	25750	484.368
Normal4	26000	485.242
Normal4	26250	486.182
Normal4	26500	487.008
Normal4	26750	487.818
Normal4	27000	488.596
Normal4	27250	489.422
Normal4	27500	490.268
Normal4	27750	491.09
Normal4	28000	491.952
Normal4	28250	492.792
Normal4	28500	493.532
Normal4	28750	494.338
Normal4	29000	495.08
Normal4	29250	495.796
Normal4	29500	496.57
Normal4	29750	497.264
Normal4	30000	498.01
Normal4	30250	498.768
Normal4	30500	499.502
Normal4	30750	500.2
Normal4	31000	500.94
Normal4	31250	501.724
Normal4	31500	502.382
Normal4	31750	503.06
Normal4	32000	503.79
Normal4	32250	504.418
Normal4	32500	505.038
Normal4	32750	505.698
Normal4	33000	506.422
Normal4	33250	507.012
Normal4	33500	507.674
Normal4	33750	508.286
Normal4	34000	508.924
Normal4	34250	509.552
Normal4	34500	510.194
Normal4	34750	510.818
Normal4	35000	511.384
Normal4	35250	511.964
Normal4	35500	512.514
Normal4	35750	513.084
Normal4	36000	513.678
Normal4	36250	514.272
Normal4	36500	514.858
Normal4	36750	515.376
Normal4	37000	515.966
Normal4	37250	516.604
Normal4	37500	517.13
Normal4	37750	517.678
Normal4	38000	518.212
Normal4	38250	518.778
Normal4	38500	519.348
Normal4	38750	519.856
Normal4	39000	520.408
Normal4	39250	520.982
Normal4	39500	521.468
Normal4	39750	522.01
Normal4	40000	522.486
Normal4	40250	522.978
Normal4	40500	523.416
Normal4	40750	523.882
Normal4	41000	524.368
Normal4	41250	524.804
Normal4	41500	525.282
Normal4	41750	525.77
Normal4	42000	526.222
Normal4	42250	526.662
Normal4	42500	527.056
Normal4	42750	527.508
Normal4	43000	527.932
Normal4	43250	528.382
Normal4	43500	528.842
Normal4	43750	529.25
Normal4	44000	529.658
Normal4	44250	530.066
Normal4	44500	530.434
Normal4	44750	530.88
Normal4	45000	531.32
Normal4	45250	531.71
Normal4	45500	532.086
Normal4	45750	532.496
Normal4	46000	532.88
Normal4	46250	533.312
Normal4	46500	533.684
Normal4	46750	534.032
Normal4	47000	534.444
Normal4	47250	534.846
Normal4	47500	535.194
Normal4	47750	535.542
Normal4	48000	535.94
Normal4	48250	536.314
Normal4	48500	536.702
Normal4	48750	537.04
Normal4	49000	537.384
Normal4	49250	537.756
Normal4	49500	538.13
Normal4	49750	538.506
Normal4	50000	538.908
Normal4	50250	539.246
Normal4	50500	539.584
Normal4	50750	539.892
Normal4	51000	540.202
Normal4	51250	540.556
Normal4	51500	540.838
Normal4	51750	541.222
Normal4	52000	541.5
Normal4	52250	541.822
Normal4	52500	542.172
Normal4	52750	542.444
Normal4	53000	542.706
Normal4	53250	542.986
Normal4	53500	543.21
Normal4	53750	543.516
Normal4	54000	543.796
Normal4	54250	544.068
Normal4	54500	544.326
Normal4	54750	544.602
Normal4	55000	544.822
Normal4	55250	545.054
Normal4	55500	545.334
Normal4	55750	545.598
Normal4	56000	545.83
Normal4	56250	546.072
Normal4	56500	546.34
Normal4	56750	546.584
Normal4	57000	546.79
Normal4	57250	547.032
Normal4	57500	547.236
Normal4	57750	547.468
Normal4	58000	547.658
Normal4	58250	547.852
Normal4	58500	548.09
Normal4	58750	548.308
Normal4	59000	548.478
Normal4	59250	548.68
Normal4	59500	548.876
Normal4	59750	549.058
Normal4	60000	549.272
Normal4	60250	549.496
Normal4	60500	549.714
Normal4	60750	549.94
Normal4	61000	550.172
Normal4	61250	550.376
Normal4	61500	550.568
Normal4	61750	550.744
Normal4	62000	550.914
Normal4	62250	551.052
Normal4	62500	551.226
Normal4	62750	551.392
Normal4	63000	551.554
Normal4	63250	551.726
Normal4	63500	551.886
Normal4	63750	552.062
Normal4	64000	552.226
Normal4	64250	552.376
Normal4	64500	552.532
Normal4	64750	552.688
Normal4	65000	552.842
Normal4	65250	552.992
Normal5	0	0
Normal5	250	118.816
Normal5	500	171.58
Normal5	750	206.072
Normal5	1000	231.804
Normal5	1250	252.346
Normal5	1500	269.138
Normal5	1750	283.642
Normal5	2000	295.96
Normal5	2250	307.076
Normal5	2500	317.172
Normal5	2750	326.35
Normal5	3000	334.854
Normal5	3250	342.632
Normal5	3500	349.604
Normal5	3750	356.334
Normal5	4000	362.656
Normal5	4250	368.814
Normal5	4500	374.55
Normal5	4750	379.876
Normal5	5000	384.878
Normal5	5250	389.872
Normal5	5500	394.542
Normal5	5750	399.03
Normal5	6000	403.34
Normal5	6250	407.382
Normal5	6500	411.518
Normal5	6750	415.226
Normal5	7000	418.866
Normal5	7250	422.332
Normal5	7500	425.842
Normal5	7750	429.178
Normal5	8000	432.492
Normal5	8250	435.698
Normal5	8500	438.756
Normal5	8750	441.69
Normal5	9000	444.632
Normal5	9250	447.464
Normal5	9500	450.302
Normal5	9750	452.97
Normal5	10000	455.55
Normal5	10250	458.134
Normal5	10500	460.674
Normal5	10750	463.096
Normal5	11000	465.388
Normal5	11250	467.714
Normal5	11500	470.022
Normal5	11750	472.33
Normal5	12000	474.534
Normal5	12250	476.578
Normal5	12500	478.72
Normal5	12750	480.802
Normal5	13000	482.854
Normal5	13250	484.85
Normal5	13500	486.724
Normal5	13750	488.616
Normal5	14000	490.566
Normal5	14250	492.372
Normal5	14500	494.238
Normal5	14750	496.064
Normal5	15000	497.814
Normal5	15250	499.516
Normal5	15500	501.238
Normal5	15750	502.924
Normal5	16000	504.566
Normal5	16250	506.236
Normal5	16500	507.878
Normal5	16750	509.418
Normal5	17000	510.908
Normal5	17250	512.446
Normal5	17500	513.95
Normal5	17750	515.448
Normal5	18000	516.986
Normal5	18250	518.532
Normal5	18500	519.998
Normal5	18750	521.43
Normal5	19000	522.786
Normal5	19250	524.156
Normal5	19500	525.524
Normal5	19750	526.864
Normal5	20000	528.248
Normal5	20250	529.54
Normal5	20500	530.764
Normal5	20750	532.138
Normal5	21000	533.342
Normal5	21250	534.654
Normal5	21500	535.898
Normal5	21750	537.126
Normal5	22000	538.368
Normal5	22250	539.544
Normal5	22500	540.734
Normal5	22750	541.888
Normal5	23000	543.074
Normal5	23250	544.18
Normal5	23500	545.178
Normal5	23750	546.308
Normal5	24000	547.424
Normal5	24250	548.426
Normal5	24500	549.438
Normal5	24750	550.502
Normal5	25000	551.56
Normal5	25250	552.562
Normal5	25500	553.662
Normal5	25750	554.712
Normal5	26000	555.744
Normal5	26250	556.752
Normal5	26500	557.706
Normal5	26750	558.71
Normal5	27000	559.582
Normal5	27250	560.63
Normal5	27500	561.562
Normal5	27750	562.424
Normal5	28000	563.384
Normal5	28250	564.268
Normal5	28500	565.156
Normal5	28750	566.048
Normal5	29000	566.95
Normal5	29250	567.75
Normal5	29500	568.612
Normal5	29750	569.478
Normal5	30000	570.368
Normal5	30250	571.206
Normal5	30500	571.936
Normal5	30750	572.716
Normal5	31000	573.596
Normal5	31250	574.364
Normal5	31500	575.164
Normal5	31750	575.962
Normal5	32000	576.732
Normal5	32250	577.416
Normal5	32500	578.16
Normal5	32750	578.878
Normal5	33000	579.606
Normal5	33250	580.262
Normal5	33500	580.962
Normal5	33750	581.656
Normal5	34000	582.422
Normal5	34250	583.08
Normal5	34500	583.802
Normal5	34750	584.532
Normal5	35000	585.218
Normal5	35250	585.882
Normal5	35500	586.616
Normal5	35750	587.28
Normal5	36000	587.932
Normal5	36250	588.632
Normal5	36500	589.234
Normal5	36750	589.86
Normal5	37000	590.494
Normal5	37250	591.1
Normal5	37500	591.684
Normal5	37750	592.324
Normal5	38000	592.95
Normal5	38250	593.494
Normal5	38500	594.148
Normal5	38750	594.732
Normal5	39000	595.3
Normal5	39250	595.878
Normal5	39500	596.418
Normal5	39750	596.984
Normal5	40000	597.584
Normal5	40250	598.106
Normal5	40500	598.662
Normal5	40750	599.192
Normal5	41000	599.796
Normal5	41250	600.324
Normal5	41500	600.8
Normal5	41750	601.302
Normal5	42000	601.756
Normal5	42250	602.242
Normal5	42500	602.758
Normal5	42750	603.246
Normal5	43000	603.706
Normal5	43250	604.238
Normal5	43500	604.684
Normal5	43750	605.108
Normal5	44000	605.548
Normal5	44250	606.026
Normal5	44500	606.448
Normal5	44750	606.874
Normal5	45000	607.29
Normal5	45250	607.692
Normal5	45500	608.114
Normal5	45750	608.528
Normal5	46000	608.938
Normal5	46250	609.402
Normal5	46500	609.778
Normal5	46750	610.216
Normal5	47000	610.582
Normal5	47250	611.002
Normal5	47500	611.354
Normal5	47750	611.738
Normal5	48000	612.148
Normal5	48250	612.592
Normal5	48500	612.986
Normal5	48750	613.354
Normal5	49000	613.744
Normal5	49250	614.128
Normal5	49500	614.446
Normal5	49750	614.804
Normal5	50000	615.122
Normal5	50250	615.47
Normal5	50500	615.812
Normal5	50750	616.108
Normal5	51000	616.466
Normal5	51250	616.778
Normal5	51500	617.074
Normal5	51750	617.35
Normal5	52000	617.652
Normal5	52250	617.966
Normal5	52500	618.268
Normal5	52750	618.558
Normal5	53000	618.836
Normal5	53250	619.134
Normal5	53500	619.422
Normal5	53750	619.676
Normal5	54000	619.948
Normal5	54250	620.194
Normal5	54500	620.47
Normal5	54750	620.724
Normal5	55000	620.956
Normal5	55250	621.188
Normal5	55500	621.422
Normal5	55750	621.65
Normal5	56000	621.878
Normal5	56250	622.094
Normal5	56500	622.32
Normal5	56750	622.55
Normal5	57000	622.806
Normal5	57250	623
Normal5	57500	623.186
Normal5	57750	623.39
Normal5	58000	623.566
Normal5	58250	623.772
Normal5	58500	623.986
Normal5	58750	624.212
Normal5	59000	624.422
Normal5	59250	624.598
Normal5	59500	624.788
Normal5	59750	624.968
Normal5	60000	625.156
Normal5	60250	625.32
Normal5	60500	625.47
Normal5	60750	625.634
Normal5	61000	625.814
Normal5	61250	625.986
Normal5	61500	626.19
Normal5	61750	626.344
Normal5	62000	626.49
Normal5	62250	626.656
Normal5	62500	626.822
Normal5	62750	626.948
DSS1	0	0
DSS1	250	98.308
DSS1	500	138.324
DSS1	750	165.008
DSS1	1000	185.818
DSS1	1250	202.47
DSS1	1500	216.9
DSS1	1750	229.184
DSS1	2000	239.872
DSS1	2250	249.056
DSS1	2500	257.752
DSS1	2750	265.58
DSS1	3000	273.042
DSS1	3250	279.756
DSS1	3500	285.826
DSS1	3750	291.59
DSS1	4000	297.018
DSS1	4250	302.116
DSS1	4500	307.12
DSS1	4750	311.656
DSS1	5000	316.178
DSS1	5250	320.32
DSS1	5500	324.176
DSS1	5750	328.036
DSS1	6000	331.566
DSS1	6250	335.034
DSS1	6500	338.342
DSS1	6750	341.524
DSS1	7000	344.678
DSS1	7250	347.736
DSS1	7500	350.628
DSS1	7750	353.49
DSS1	8000	356.212
DSS1	8250	358.942
DSS1	8500	361.424
DSS1	8750	364.058
DSS1	9000	366.546
DSS1	9250	368.878
DSS1	9500	371.15
DSS1	9750	373.374
DSS1	10000	375.728
DSS1	10250	377.962
DSS1	10500	380.15
DSS1	10750	382.128
DSS1	11000	384.096
DSS1	11250	386.054
DSS1	11500	387.968
DSS1	11750	389.836
DSS1	12000	391.74
DSS1	12250	393.602
DSS1	12500	395.364
DSS1	12750	397.096
DSS1	13000	398.964
DSS1	13250	400.566
DSS1	13500	402.21
DSS1	13750	403.864
DSS1	14000	405.414
DSS1	14250	407
DSS1	14500	408.534
DSS1	14750	410.168
DSS1	15000	411.662
DSS1	15250	413.106
DSS1	15500	414.592
DSS1	15750	416.048
DSS1	16000	417.45
DSS1	16250	418.86
DSS1	16500	420.242
DSS1	16750	421.53
DSS1	17000	422.904
DSS1	17250	424.216
DSS1	17500	425.484
DSS1	17750	426.768
DSS1	18000	428.034
DSS1	18250	429.348
DSS1	18500	430.504
DSS1	18750	431.774
DSS1	19000	432.974
DSS1	19250	434.118
DSS1	19500	435.18
DSS1	19750	436.316
DSS1	20000	437.412
DSS1	20250	438.598
DSS1	20500	439.628
DSS1	20750	440.834
DSS1	21000	441.896
DSS1	21250	443.034
DSS1	21500	444.094
DSS1	21750	445.08
DSS1	22000	446.114
DSS1	22250	447.07
DSS1	22500	448.156
DSS1	22750	449.1
DSS1	23000	450.054
DSS1	23250	450.942
DSS1	23500	451.86
DSS1	23750	452.814
DSS1	24000	453.712
DSS1	24250	454.658
DSS1	24500	455.586
DSS1	24750	456.478
DSS1	25000	457.34
DSS1	25250	458.248
DSS1	25500	459.148
DSS1	25750	460.008
DSS1	26000	460.754
DSS1	26250	461.554
DSS1	26500	462.408
DSS1	26750	463.2
DSS1	27000	463.988
DSS1	27250	464.814
DSS1	27500	465.632
DSS1	27750	466.418
DSS1	28000	467.2
DSS1	28250	468.054
DSS1	28500	468.9
DSS1	28750	469.674
DSS1	29000	470.456
DSS1	29250	471.104
DSS1	29500	471.792
DSS1	29750	472.516
DSS1	30000	473.224
DSS1	30250	473.922
DSS1	30500	474.678
DSS1	30750	475.336
DSS1	31000	476.042
DSS1	31250	476.7
DSS1	31500	477.362
DSS1	31750	478.016
DSS1	32000	478.708
DSS1	32250	479.278
DSS1	32500	479.862
DSS1	32750	480.426
DSS1	33000	481.056
DSS1	33250	481.71
DSS1	33500	482.38
DSS1	33750	482.976
DSS1	34000	483.548
DSS1	34250	484.158
DSS1	34500	484.75
DSS1	34750	485.318
DSS1	35000	485.884
DSS1	35250	486.478
DSS1	35500	487.072
DSS1	35750	487.63
DSS1	36000	488.186
DSS1	36250	488.77
DSS1	36500	489.322
DSS1	36750	489.826
DSS1	37000	490.364
DSS1	37250	490.876
DSS1	37500	491.406
DSS1	37750	491.852
DSS1	38000	492.344
DSS1	38250	492.854
DSS1	38500	493.356
DSS1	38750	493.84
DSS1	39000	494.384
DSS1	39250	494.906
DSS1	39500	495.376
DSS1	39750	495.838
DSS1	40000	496.308
DSS1	40250	496.79
DSS1	40500	497.276
DSS1	40750	497.756
DSS1	41000	498.196
DSS1	41250	498.648
DSS1	41500	499.092
DSS1	41750	499.486
DSS1	42000	499.926
DSS1	42250	500.344
DSS1	42500	500.788
DSS1	42750	501.184
DSS1	43000	501.612
DSS1	43250	502.028
DSS1	43500	502.462
DSS1	43750	502.856
DSS1	44000	503.246
DSS1	44250	503.694
DSS1	44500	504.084
DSS1	44750	504.486
DSS1	45000	504.88
DSS1	45250	505.216
DSS1	45500	505.58
DSS1	45750	505.894
DSS1	46000	506.262
DSS1	46250	506.624
DSS1	46500	506.944
DSS1	46750	507.266
DSS1	47000	507.614
DSS1	47250	507.97
DSS1	47500	508.27
DSS1	47750	508.636
DSS1	48000	509.006
DSS1	48250	509.346
DSS1	48500	509.666
DSS1	48750	509.98
DSS1	49000	510.272
DSS1	49250	510.556
DSS1	49500	510.864
DSS1	49750	511.172
DSS1	50000	511.48
DSS1	50250	511.812
DSS1	50500	512.152
DSS1	50750	512.458
DSS1	51000	512.748
DSS1	51250	513.038
DSS1	51500	513.336
DSS1	51750	513.62
DSS1	52000	513.946
DSS1	52250	514.192
DSS1	52500	514.47
DSS1	52750	514.726
DSS1	53000	514.986
DSS1	53250	515.208
DSS1	53500	515.482
DSS1	53750	515.74
DSS1	54000	515.992
DSS1	54250	516.21
DSS1	54500	516.464
DSS1	54750	516.718
DSS1	55000	516.966
DSS1	55250	517.23
DSS1	55500	517.486
DSS1	55750	517.68
DSS1	56000	517.92
DSS1	56250	518.14
DSS1	56500	518.34
DSS1	56750	518.574
DSS1	57000	518.772
DSS1	57250	518.982
DSS1	57500	519.2
DSS1	57750	519.448
DSS1	58000	519.654
DSS1	58250	519.856
DSS1	58500	520.056
DSS1	58750	520.232
DSS1	59000	520.426
DSS1	59250	520.638
DSS1	59500	520.812
DSS1	59750	520.958
DSS1	60000	521.138
DSS1	60250	521.31
DSS1	60500	521.488
DSS1	60750	521.646
DSS1	61000	521.812
DSS1	61250	521.994
DSS1	61500	522.142
DSS1	61750	522.31
DSS1	62000	522.466
DSS1	62250	522.648
DSS1	62500	522.794
DSS1	62750	522.956
DSS1	63000	523.104
DSS1	63250	523.21
DSS1	63500	523.33
DSS1	63750	523.502
DSS1	64000	523.634
DSS1	64250	523.788
DSS1	64500	523.902
DSS1	64750	524.04
DSS1	65000	524.152
DSS1	65250	524.24
DSS1	65500	524.366
DSS1	65750	524.486
DSS1	66000	524.636
DSS1	66250	524.732
DSS1	66500	524.828
DSS1	66750	524.958
DSS1	67000	525.058
DSS1	67250	525.132
DSS1	67500	525.248
DSS1	67750	525.344
DSS1	68000	525.456
DSS1	68250	525.528
DSS1	68500	525.63
DSS1	68750	525.716
DSS1	69000	525.8
DSS1	69250	525.886
DSS1	69500	525.97
DSS2	0	0
DSS2	250	106.676
DSS2	500	152.316
DSS2	750	183.306
DSS2	1000	206.964
DSS2	1250	225.912
DSS2	1500	241.772
DSS2	1750	255.416
DSS2	2000	267.31
DSS2	2250	277.876
DSS2	2500	287.332
DSS2	2750	296.15
DSS2	3000	304.092
DSS2	3250	311.272
DSS2	3500	317.768
DSS2	3750	324.092
DSS2	4000	329.82
DSS2	4250	335.318
DSS2	4500	340.236
DSS2	4750	345.108
DSS2	5000	349.622
DSS2	5250	354.058
DSS2	5500	358.206
DSS2	5750	362.258
DSS2	6000	365.972
DSS2	6250	369.558
DSS2	6500	373.004
DSS2	6750	376.318
DSS2	7000	379.456
DSS2	7250	382.616
DSS2	7500	385.734
DSS2	7750	388.694
DSS2	8000	391.48
DSS2	8250	394.22
DSS2	8500	396.834
DSS2	8750	399.48
DSS2	9000	401.98
DSS2	9250	404.416
DSS2	9500	406.864
DSS2	9750	409.058
DSS2	10000	411.236
DSS2	10250	413.37
DSS2	10500	415.568
DSS2	10750	417.76
DSS2	11000	419.762
DSS2	11250	421.742
DSS2	11500	423.748
DSS2	11750	425.602
DSS2	12000	427.42
DSS2	12250	429.27
DSS2	12500	431.068
DSS2	12750	432.792
DSS2	13000	434.62
DSS2	13250	436.364
DSS2	13500	438.116
DSS2	13750	439.722
DSS2	14000	441.306
DSS2	14250	442.74
DSS2	14500	444.254
DSS2	14750	445.844
DSS2	15000	447.308
DSS2	15250	448.73
DSS2	15500	450.202
DSS2	15750	451.582
DSS2	16000	452.992
DSS2	16250	454.424
DSS2	16500	455.798
DSS2	16750	457.018
DSS2	17000	458.352
DSS2	17250	459.586
DSS2	17500	460.864
DSS2	17750	462.092
DSS2	18000	463.42
DSS2	18250	464.63
DSS2	18500	465.864
DSS2	18750	467.036
DSS2	19000	468.264
DSS2	19250	469.506
DSS2	19500	470.644
DSS2	19750	471.758
DSS2	20000	472.916
DSS2	20250	473.95
DSS2	20500	475.076
DSS2	20750	476.1
DSS2	21000	477.174
DSS2	21250	478.224
DSS2	21500	479.208
DSS2	21750	480.164
DSS2	22000	481.072
DSS2	22250	482.1
DSS2	22500	483.092
DSS2	22750	484.098
DSS2	23000	484.98
DSS2	23250	485.904
DSS2	23500	486.86
DSS2	23750	487.778
DSS2	24000	488.648
DSS2	24250	489.514
DSS2	24500	490.348
DSS2	24750	491.246
DSS2	25000	492.154
DSS2	25250	492.988
DSS2	25500	493.846
DSS2	25750	494.668
DSS2	26000	495.418
DSS2	26250	496.118
DSS2	26500	496.92
DSS2	26750	497.718
DSS2	27000	498.436
DSS2	27250	499.192
DSS2	27500	499.99
DSS2	27750	500.772
DSS2	28000	501.528
DSS2	28250	502.19
DSS2	28500	502.934
DSS2	28750	503.584
DSS2	29000	504.286
DSS2	29250	505.02
DSS2	29500	505.788
DSS2	29750	506.47
DSS2	30000	507.12
DSS2	30250	507.818
DSS2	30500	508.54
DSS2	30750	509.246
DSS2	31000	509.912
DSS2	31250	510.572
DSS2	31500	511.254
DSS2	31750	511.918
DSS2	32000	512.494
DSS2	32250	513.186
DSS2	32500	513.798
DSS2	32750	514.378
DSS2	33000	514.944
DSS2	33250	515.562
DSS2	33500	516.18
DSS2	33750	516.72
DSS2	34000	517.262
DSS2	34250	517.848
DSS2	34500	518.426
DSS2	34750	518.958
DSS2	35000	519.5
DSS2	35250	519.936
DSS2	35500	520.456
DSS2	35750	521.02
DSS2	36000	521.548
DSS2	36250	522.094
DSS2	36500	522.608
DSS2	36750	523.088
DSS2	37000	523.542
DSS2	37250	524.056
DSS2	37500	524.558
DSS2	37750	525.022
DSS2	38000	525.534
DSS2	38250	525.956
DSS2	38500	526.422
DSS2	38750	526.894
DSS2	39000	527.378
DSS2	39250	527.854
DSS2	39500	528.294
DSS2	39750	528.652
DSS2	40000	529.102
DSS2	40250	529.558
DSS2	40500	529.948
DSS2	40750	530.378
DSS2	41000	530.796
DSS2	41250	531.222
DSS2	41500	531.666
DSS2	41750	532.038
DSS2	42000	532.422
DSS2	42250	532.846
DSS2	42500	533.286
DSS2	42750	533.654
DSS2	43000	534.056
DSS2	43250	534.428
DSS2	43500	534.808
DSS2	43750	535.186
DSS2	44000	535.524
DSS2	44250	535.864
DSS2	44500	536.184
DSS2	44750	536.55
DSS2	45000	536.928
DSS2	45250	537.276
DSS2	45500	537.672
DSS2	45750	538.032
DSS2	46000	538.388
DSS2	46250	538.744
DSS2	46500	539.082
DSS2	46750	539.404
DSS2	47000	539.752
DSS2	47250	540.042
DSS2	47500	540.356
DSS2	47750	540.664
DSS2	48000	540.972
DSS2	48250	541.288
DSS2	48500	541.62
DSS2	48750	541.916
DSS2	49000	542.182
DSS2	49250	542.508
DSS2	49500	542.78
DSS2	49750	543.074
DSS2	50000	543.332
DSS2	50250	543.644
DSS2	50500	543.896
DSS2	50750	544.162
DSS2	51000	544.412
DSS2	51250	544.708
DSS2	51500	544.996
DSS2	51750	545.302
DSS2	52000	545.59
DSS2	52250	545.832
DSS2	52500	546.106
DSS2	52750	546.352
DSS2	53000	546.574
DSS2	53250	546.828
DSS2	53500	547.026
DSS2	53750	547.284
DSS2	54000	547.516
DSS2	54250	547.742
DSS2	54500	547.976
DSS2	54750	548.176
DSS2	55000	548.404
DSS2	55250	548.616
DSS2	55500	548.802
DSS2	55750	548.968
DSS2	56000	549.164
DSS2	56250	549.402
DSS2	56500	549.61
DSS2	56750	549.84
DSS2	57000	550.018
DSS2	57250	550.2
DSS2	57500	550.362
DSS2	57750	550.572
DSS2	58000	550.778
DSS2	58250	550.948
DSS2	58500	551.126
DSS2	58750	551.278
DSS2	59000	551.438
DSS2	59250	551.624
DSS2	59500	551.816
DSS2	59750	551.934
DSS2	60000	552.118
DSS2	60250	552.276
DSS2	60500	552.434
DSS2	60750	552.58
DSS2	61000	552.724
DSS2	61250	552.878
DSS2	61500	553.002
DSS2	61750	553.12
DSS2	62000	553.266
DSS2	62250	553.392
DSS2	62500	553.516
DSS2	62750	553.668
DSS2	63000	553.8
DSS2	63250	553.914
DSS2	63500	554.03
DSS2	63750	554.142
DSS2	64000	554.256
DSS2	64250	554.35
DSS2	64500	554.452
DSS2	64750	554.594
DSS2	65000	554.726
DSS2	65250	554.826
DSS2	65500	554.934
DSS2	65750	555.022
DSS2	66000	555.118
DSS2	66250	555.214
DSS2	66500	555.31
DSS2	66750	555.38
DSS2	67000	555.488
DSS2	67250	555.58
DSS2	67500	555.672
DSS2	67750	555.744
DSS2	68000	555.832
DSS2	68250	555.902
DSS2	68500	555.972
DSS3	0	0
DSS3	250	97.06
DSS3	500	137.312
DSS3	750	164.334
DSS3	1000	184.358
DSS3	1250	200.778
DSS3	1500	214.456
DSS3	1750	226.282
DSS3	2000	236.602
DSS3	2250	246.014
DSS3	2500	254.418
DSS3	2750	262.444
DSS3	3000	269.268
DSS3	3250	275.79
DSS3	3500	281.754
DSS3	3750	287.562
DSS3	4000	292.876
DSS3	4250	297.646
DSS3	4500	302.29
DSS3	4750	306.634
DSS3	5000	310.944
DSS3	5250	315.034
DSS3	5500	318.956
DSS3	5750	322.76
DSS3	6000	326.344
DSS3	6250	329.784
DSS3	6500	333.132
DSS3	6750	336.294
DSS3	7000	339.406
DSS3	7250	342.304
DSS3	7500	345.266
DSS3	7750	348.014
DSS3	8000	350.732
DSS3	8250	353.41
DSS3	8500	356
DSS3	8750	358.522
DSS3	9000	360.91
DSS3	9250	363.31
DSS3	9500	365.524
DSS3	9750	367.824
DSS3	10000	369.916
DSS3	10250	372.052
DSS3	10500	374.104
DSS3	10750	376.134
DSS3	11000	378.104
DSS3	11250	380.034
DSS3	11500	381.968
DSS3	11750	383.766
DSS3	12000	385.412
DSS3	12250	387.23
DSS3	12500	389.006
DSS3	12750	390.642
DSS3	13000	392.262
DSS3	13250	393.91
DSS3	13500	395.64
DSS3	13750	397.172
DSS3	14000	398.728
DSS3	14250	400.29
DSS3	14500	401.77
DSS3	14750	403.14
DSS3	15000	404.57
DSS3	15250	406.06
DSS3	15500	407.36
DSS3	15750	408.666
DSS3	16000	409.918
DSS3	16250	411.274
DSS3	16500	412.566
DSS3	16750	413.784
DSS3	17000	415.02
DSS3	17250	416.182
DSS3	17500	417.336
DSS3	17750	418.54
DSS3	18000	419.684
DSS3	18250	420.898
DSS3	18500	422.062
DSS3	18750	423.098
DSS3	19000	424.276
DSS3	19250	425.418
DSS3	19500	426.476
DSS3	19750	427.568
DSS3	20000	428.58
DSS3	20250	429.632
DSS3	20500	430.624
DSS3	20750	431.598
DSS3	21000	432.612
DSS3	21250	433.648
DSS3	21500	434.642
DSS3	21750	435.626
DSS3	22000	436.588
DSS3	22250	437.488
DSS3	22500	438.452
DSS3	22750	439.374
DSS3	23000	440.328
DSS3	23250	441.206
DSS3	23500	442.068
DSS3	23750	442.918
DSS3	24000	443.804
DSS3	24250	444.702
DSS3	24500	445.562
DSS3	24750	446.372
DSS3	25000	447.184
DSS3	25250	447.974
DSS3	25500	448.808
DSS3	25750	449.588
DSS3	26000	450.404
DSS3	26250	451.234
DSS3	26500	451.958
DSS3	26750	452.708
DSS3	27000	453.478
DSS3	27250	454.208
DSS3	27500	454.984
DSS3	27750	455.706
DSS3	28000	456.43
[truncated: 3,519 more rows]

## Sheet: shannon_curve_data
sample	numsampled	Value
Normal1	0	0
Normal1	250	6.25581
Normal1	500	6.58619
Normal1	750	6.73118
Normal1	1000	6.81457
Normal1	1250	6.86665
Normal1	1500	6.90315
Normal1	1750	6.93316
Normal1	2000	6.95624
Normal1	2250	6.97413
Normal1	2500	6.98726
Normal1	2750	6.99952
Normal1	3000	7.01034
Normal1	3250	7.01958
Normal1	3500	7.02751
Normal1	3750	7.03444
Normal1	4000	7.04035
Normal1	4250	7.04627
Normal1	4500	7.05016
Normal1	4750	7.05435
Normal1	5000	7.05882
Normal1	5250	7.06315
Normal1	5500	7.0669
Normal1	5750	7.07007
Normal1	6000	7.07252
Normal1	6250	7.07541
Normal1	6500	7.07829
Normal1	6750	7.0806
Normal1	7000	7.0832
Normal1	7250	7.08507
Normal1	7500	7.08681
Normal1	7750	7.08883
Normal1	8000	7.09041
Normal1	8250	7.09215
Normal1	8500	7.09373
Normal1	8750	7.09546
Normal1	9000	7.0969
Normal1	9250	7.09835
Normal1	9500	7.0995
Normal1	9750	7.10095
Normal1	10000	7.10224
Normal1	10250	7.10311
Normal1	10500	7.10412
Normal1	10750	7.10499
Normal1	11000	7.10614
Normal1	11250	7.107
Normal1	11500	7.10801
Normal1	11750	7.10888
Normal1	12000	7.10975
Normal1	12250	7.11032
Normal1	12500	7.11104
Normal1	12750	7.11162
Normal1	13000	7.11234
Normal1	13250	7.11292
Normal1	13500	7.11364
Normal1	13750	7.11436
Normal1	14000	7.11494
Normal1	14250	7.11552
Normal1	14500	7.11609
Normal1	14750	7.11667
Normal1	15000	7.1171
Normal1	15250	7.11782
Normal1	15500	7.1184
Normal1	15750	7.11898
Normal1	16000	7.1197
Normal1	16250	7.12013
Normal1	16500	7.12057
Normal1	16750	7.12114
Normal1	17000	7.12143
Normal1	17250	7.12186
Normal1	17500	7.12244
Normal1	17750	7.12302
Normal1	18000	7.12316
Normal1	18250	7.12374
Normal1	18500	7.12403
Normal1	18750	7.12432
Normal1	19000	7.1246
Normal1	19250	7.12489
Normal1	19500	7.12518
Normal1	19750	7.12561
Normal1	20000	7.1259
Normal1	20250	7.12634
Normal1	20500	7.12662
Normal1	20750	7.12691
Normal1	21000	7.1272
Normal1	21250	7.12749
Normal1	21500	7.12778
Normal1	21750	7.12807
Normal1	22000	7.12836
Normal1	22250	7.1285
Normal1	22500	7.12879
Normal1	22750	7.12908
Normal1	23000	7.12922
Normal1	23250	7.12965
Normal1	23500	7.12994
Normal1	23750	7.13023
Normal1	24000	7.13038
Normal1	24250	7.13052
Normal1	24500	7.13066
Normal1	24750	7.1311
Normal1	25000	7.13124
Normal1	25250	7.13153
Normal1	25500	7.13167
Normal1	25750	7.13196
Normal1	26000	7.13211
Normal1	26250	7.13225
Normal1	26500	7.13254
Normal1	26750	7.13268
Normal1	27000	7.13297
Normal1	27250	7.13312
Normal1	27500	7.13341
Normal1	27750	7.13369
Normal1	28000	7.13384
Normal1	28250	7.13398
Normal1	28500	7.13427
Normal1	28750	7.13442
Normal1	29000	7.13456
Normal1	29250	7.1347
Normal1	29500	7.13485
Normal1	29750	7.13499
Normal1	30000	7.13528
Normal1	30250	7.13528
Normal1	30500	7.13557
Normal1	30750	7.13557
Normal1	31000	7.13571
Normal1	31250	7.13586
Normal1	31500	7.136
Normal1	31750	7.136
Normal1	32000	7.13615
Normal1	32250	7.13629
Normal1	32500	7.13643
Normal1	32750	7.13658
Normal1	33000	7.13672
Normal1	33250	7.13687
Normal1	33500	7.13701
Normal1	33750	7.13701
Normal1	34000	7.13716
Normal1	34250	7.1373
Normal1	34500	7.1373
Normal1	34750	7.13744
Normal1	35000	7.13759
Normal1	35250	7.13773
Normal1	35500	7.13773
Normal1	35750	7.13773
Normal1	36000	7.13788
Normal1	36250	7.13802
Normal1	36500	7.13817
Normal1	36750	7.13831
Normal1	37000	7.13846
Normal1	37250	7.13846
Normal1	37500	7.1386
Normal1	37750	7.13874
Normal1	38000	7.13889
Normal1	38250	7.13903
Normal1	38500	7.13903
Normal1	38750	7.13903
Normal1	39000	7.13903
Normal1	39250	7.13918
Normal1	39500	7.13918
Normal1	39750	7.13918
Normal1	40000	7.13932
Normal1	40250	7.13947
Normal1	40500	7.13947
Normal1	40750	7.13961
Normal1	41000	7.13961
Normal1	41250	7.13975
Normal1	41500	7.13975
Normal1	41750	7.13975
Normal1	42000	7.1399
Normal1	42250	7.14004
Normal1	42500	7.14019
Normal1	42750	7.14033
Normal1	43000	7.14033
Normal1	43250	7.14048
Normal1	43500	7.14048
Normal1	43750	7.14062
Normal1	44000	7.14062
Normal1	44250	7.14062
Normal1	44500	7.14076
Normal1	44750	7.14076
Normal1	45000	7.14091
Normal1	45250	7.14091
Normal1	45500	7.14105
Normal1	45750	7.1412
Normal1	46000	7.14134
Normal1	46250	7.14134
Normal1	46500	7.14149
Normal1	46750	7.14149
Normal1	47000	7.14149
Normal1	47250	7.14163
Normal1	47500	7.14163
Normal1	47750	7.14177
Normal1	48000	7.14192
Normal1	48250	7.14192
Normal1	48500	7.14192
Normal1	48750	7.14206
Normal1	49000	7.14206
Normal1	49250	7.14206
Normal1	49500	7.14206
Normal1	49750	7.14221
Normal1	50000	7.14221
Normal1	50250	7.14235
Normal1	50500	7.14235
Normal1	50750	7.14235
Normal1	51000	7.1425
Normal1	51250	7.1425
Normal1	51500	7.1425
Normal1	51750	7.1425
Normal1	52000	7.14264
Normal1	52250	7.14264
Normal1	52500	7.14278
Normal1	52750	7.14278
Normal1	53000	7.14278
Normal1	53250	7.14278
Normal1	53500	7.14278
Normal1	53750	7.14278
Normal1	54000	7.14278
Normal1	54250	7.14293
Normal1	54500	7.14307
Normal1	54750	7.14307
Normal1	55000	7.14307
Normal1	55250	7.14307
Normal1	55500	7.14322
Normal1	55750	7.14322
Normal1	56000	7.14336
Normal1	56250	7.14336
Normal1	56500	7.14336
Normal1	56750	7.1435
Normal1	57000	7.1435
Normal1	57250	7.1435
Normal1	57500	7.1435
Normal1	57750	7.1435
Normal1	58000	7.14365
Normal1	58250	7.14365
Normal1	58500	7.14365
Normal1	58750	7.14365
Normal1	59000	7.14365
Normal1	59250	7.14365
Normal1	59500	7.14379
Normal1	59750	7.14379
Normal1	60000	7.14379
Normal1	60250	7.14379
Normal1	60500	7.14394
Normal1	60750	7.14394
Normal1	61000	7.14394
Normal1	61250	7.14394
Normal1	61500	7.14408
Normal1	61750	7.14408
Normal1	62000	7.14408
Normal1	62250	7.14408
Normal1	62500	7.14423
Normal1	62750	7.14423
Normal1	63000	7.14423
Normal1	63250	7.14423
Normal1	63500	7.14437
Normal1	63750	7.14437
Normal1	64000	7.14437
Normal1	64250	7.14437
Normal1	64500	7.14451
Normal1	64750	7.14451
Normal1	65000	7.14451
Normal1	65250	7.14451
Normal1	65500	7.14451
Normal1	65750	7.14466
Normal1	66000	7.14466
Normal1	66250	7.14466
Normal1	66500	7.14466
Normal1	66750	7.1448
Normal1	67000	7.1448
Normal1	67250	7.1448
Normal1	67500	7.1448
Normal1	67750	7.14495
Normal2	0	0
Normal2	250	6.45015
Normal2	500	6.77316
Normal2	750	6.91051
Normal2	1000	6.99144
Normal2	1250	7.04367
Normal2	1500	7.07988
Normal2	1750	7.10946
Normal2	2000	7.13297
Normal2	2250	7.15115
Normal2	2500	7.16615
Normal2	2750	7.1777
Normal2	3000	7.18852
Normal2	3250	7.19746
Normal2	3500	7.20511
Normal2	3750	7.21189
Normal2	4000	7.21838
Normal2	4250	7.22343
Normal2	4500	7.22848
Normal2	4750	7.23324
Normal2	5000	7.23757
Normal2	5250	7.24132
Normal2	5500	7.24478
Normal2	5750	7.24853
Normal2	6000	7.25156
Normal2	6250	7.25401
Normal2	6500	7.25618
Normal2	6750	7.25863
Normal2	7000	7.26051
Normal2	7250	7.26224
Normal2	7500	7.2644
Normal2	7750	7.26628
Normal2	8000	7.26815
Normal2	8250	7.26974
Normal2	8500	7.27104
Normal2	8750	7.27277
Normal2	9000	7.27407
Normal2	9250	7.27551
Normal2	9500	7.2771
Normal2	9750	7.2784
Normal2	10000	7.27955
Normal2	10250	7.28085
Normal2	10500	7.28186
Normal2	10750	7.28316
Normal2	11000	7.28417
Normal2	11250	7.28503
Normal2	11500	7.28619
Normal2	11750	7.28705
Normal2	12000	7.28777
Normal2	12250	7.28864
Normal2	12500	7.28936
Normal2	12750	7.29008
Normal2	13000	7.29066
Normal2	13250	7.29138
Normal2	13500	7.29181
Normal2	13750	7.29253
Normal2	14000	7.29311
Normal2	14250	7.29369
Normal2	14500	7.29427
Normal2	14750	7.29513
Normal2	15000	7.29556
Normal2	15250	7.29614
Normal2	15500	7.29657
Normal2	15750	7.29715
Normal2	16000	7.29773
Normal2	16250	7.29831
Normal2	16500	7.29888
Normal2	16750	7.29932
Normal2	17000	7.29989
Normal2	17250	7.30047
Normal2	17500	7.30105
Normal2	17750	7.30133
Normal2	18000	7.30177
Normal2	18250	7.3022
Normal2	18500	7.30249
Normal2	18750	7.30292
Normal2	19000	7.30335
Normal2	19250	7.30379
Normal2	19500	7.30422
Normal2	19750	7.30436
Normal2	20000	7.30451
Normal2	20250	7.30494
Normal2	20500	7.30509
Normal2	20750	7.30537
Normal2	21000	7.30581
Normal2	21250	7.3061
Normal2	21500	7.30638
Normal2	21750	7.30667
Normal2	22000	7.30696
Normal2	22250	7.30725
Normal2	22500	7.30754
Normal2	22750	7.30768
Normal2	23000	7.30797
Normal2	23250	7.3084
Normal2	23500	7.30869
Normal2	23750	7.30898
Normal2	24000	7.30913
Normal2	24250	7.30927
Normal2	24500	7.30956
Normal2	24750	7.3097
Normal2	25000	7.30985
Normal2	25250	7.31028
Normal2	25500	7.31042
Normal2	25750	7.31057
Normal2	26000	7.31086
Normal2	26250	7.311
Normal2	26500	7.31129
Normal2	26750	7.31129
Normal2	27000	7.31143
Normal2	27250	7.31158
Normal2	27500	7.31172
Normal2	27750	7.31187
Normal2	28000	7.31201
Normal2	28250	7.31216
Normal2	28500	7.3123
Normal2	28750	7.31244
Normal2	29000	7.31259
Normal2	29250	7.31273
Normal2	29500	7.31288
Normal2	29750	7.31316
Normal2	30000	7.31331
Normal2	30250	7.3136
Normal2	30500	7.3136
Normal2	30750	7.31374
Normal2	31000	7.31374
Normal2	31250	7.31389
Normal2	31500	7.31417
Normal2	31750	7.31432
Normal2	32000	7.31432
Normal2	32250	7.31446
Normal2	32500	7.31461
Normal2	32750	7.31475
Normal2	33000	7.31475
Normal2	33250	7.3149
Normal2	33500	7.31504
Normal2	33750	7.31518
Normal2	34000	7.31533
Normal2	34250	7.31547
Normal2	34500	7.31562
Normal2	34750	7.31576
Normal2	35000	7.31576
Normal2	35250	7.31591
Normal2	35500	7.31605
Normal2	35750	7.31605
Normal2	36000	7.31619
Normal2	36250	7.31634
Normal2	36500	7.31634
Normal2	36750	7.31648
Normal2	37000	7.31663
Normal2	37250	7.31677
Normal2	37500	7.31692
Normal2	37750	7.31706
Normal2	38000	7.31706
Normal2	38250	7.31721
Normal2	38500	7.31735
Normal2	38750	7.31735
Normal2	39000	7.31749
Normal2	39250	7.31764
Normal2	39500	7.31764
Normal2	39750	7.31778
Normal2	40000	7.31778
Normal2	40250	7.31793
Normal2	40500	7.31807
Normal2	40750	7.31822
Normal2	41000	7.31822
Normal2	41250	7.31836
Normal2	41500	7.3185
Normal2	41750	7.3185
Normal2	42000	7.31865
Normal2	42250	7.31879
Normal2	42500	7.31879
Normal2	42750	7.31879
Normal2	43000	7.31894
Normal2	43250	7.31908
Normal2	43500	7.31908
Normal2	43750	7.31923
Normal2	44000	7.31937
Normal2	44250	7.31937
Normal2	44500	7.31951
Normal2	44750	7.31951
Normal2	45000	7.31966
Normal2	45250	7.31966
Normal2	45500	7.31966
Normal2	45750	7.31966
Normal2	46000	7.3198
Normal2	46250	7.3198
Normal2	46500	7.3198
Normal2	46750	7.31995
Normal2	47000	7.32009
Normal2	47250	7.32009
Normal2	47500	7.32009
Normal2	47750	7.32009
Normal2	48000	7.32024
Normal2	48250	7.32024
Normal2	48500	7.32024
Normal2	48750	7.32038
Normal2	49000	7.32038
Normal2	49250	7.32052
Normal2	49500	7.32052
Normal2	49750	7.32067
Normal2	50000	7.32081
Normal2	50250	7.32081
Normal2	50500	7.32081
Normal2	50750	7.32096
Normal2	51000	7.32096
Normal2	51250	7.32096
Normal2	51500	7.3211
Normal2	51750	7.3211
Normal2	52000	7.32125
Normal2	52250	7.32125
Normal2	52500	7.32125
Normal2	52750	7.32125
Normal2	53000	7.32139
Normal2	53250	7.32153
Normal2	53500	7.32153
Normal2	53750	7.32153
Normal2	54000	7.32153
Normal2	54250	7.32168
Normal2	54500	7.32168
Normal2	54750	7.32182
Normal2	55000	7.32182
Normal2	55250	7.32182
Normal2	55500	7.32182
Normal2	55750	7.32197
Normal2	56000	7.32197
Normal2	56250	7.32197
Normal2	56500	7.32211
Normal2	56750	7.32211
Normal2	57000	7.32211
Normal2	57250	7.32211
Normal2	57500	7.32225
Normal2	57750	7.32225
Normal2	58000	7.32225
Normal2	58250	7.32225
Normal2	58500	7.3224
Normal2	58750	7.3224
Normal2	59000	7.3224
Normal2	59250	7.3224
Normal2	59500	7.32254
Normal2	59750	7.32254
Normal2	60000	7.32269
Normal2	60250	7.32269
Normal2	60500	7.32269
Normal2	60750	7.32269
Normal2	61000	7.32269
Normal2	61250	7.32283
Normal2	61500	7.32283
Normal2	61750	7.32283
Normal2	62000	7.32283
Normal2	62250	7.32283
Normal2	62500	7.32283
Normal2	62750	7.32298
Normal2	63000	7.32298
Normal2	63250	7.32298
Normal2	63500	7.32312
Normal2	63750	7.32312
Normal2	64000	7.32312
Normal2	64250	7.32326
Normal2	64500	7.32326
Normal2	64750	7.32326
Normal2	65000	7.32326
Normal2	65250	7.32341
Normal2	65500	7.32341
Normal2	65750	7.32341
Normal2	66000	7.32341
Normal2	66250	7.32341
Normal2	66500	7.32341
Normal2	66750	7.32355
Normal2	67000	7.32355
Normal2	67250	7.32355
Normal2	67500	7.32355
Normal2	67750	7.32355
Normal2	68000	7.3237
Normal3	0	0
Normal3	250	6.173
Normal3	500	6.45649
Normal3	750	6.58114
Normal3	1000	6.64852
Normal3	1250	6.69425
Normal3	1500	6.72613
Normal3	1750	6.74835
Normal3	2000	6.7671
Normal3	2250	6.78225
Normal3	2500	6.79509
Normal3	2750	6.80606
Normal3	3000	6.81515
Normal3	3250	6.82337
Normal3	3500	6.83015
Normal3	3750	6.8365
Normal3	4000	6.84184
Normal3	4250	6.84645
Normal3	4500	6.85136
Normal3	4750	6.85511
Normal3	5000	6.859
Normal3	5250	6.86203
Normal3	5500	6.86535
Normal3	5750	6.86824
Normal3	6000	6.8704
Normal3	6250	6.87286
Normal3	6500	6.87531
Normal3	6750	6.87747
Normal3	7000	6.87949
Normal3	7250	6.88122
Normal3	7500	6.88295
Normal3	7750	6.88469
Normal3	8000	6.88613
Normal3	8250	6.88772
Normal3	8500	6.88916
Normal3	8750	6.89046
Normal3	9000	6.89161
Normal3	9250	6.89276
Normal3	9500	6.89392
Normal3	9750	6.89522
Normal3	10000	6.89623
Normal3	10250	6.89738
Normal3	10500	6.89839
Normal3	10750	6.89926
Normal3	11000	6.89983
Normal3	11250	6.90084
Normal3	11500	6.90156
Normal3	11750	6.90214
Normal3	12000	6.90272
Normal3	12250	6.90344
Normal3	12500	6.90416
Normal3	12750	6.90445
Normal3	13000	6.90517
Normal3	13250	6.9056
Normal3	13500	6.90618
Normal3	13750	6.90676
Normal3	14000	6.90748
Normal3	14250	6.90791
Normal3	14500	6.90849
Normal3	14750	6.90921
Normal3	15000	6.9095
Normal3	15250	6.90993
Normal3	15500	6.91022
Normal3	15750	6.9108
Normal3	16000	6.91123
Normal3	16250	6.91152
Normal3	16500	6.9121
Normal3	16750	6.91238
Normal3	17000	6.91267
Normal3	17250	6.91296
Normal3	17500	6.91354
Normal3	17750	6.91383
Normal3	18000	6.91426
Normal3	18250	6.91469
Normal3	18500	6.91484
Normal3	18750	6.91527
Normal3	19000	6.91556
Normal3	19250	6.91585
Normal3	19500	6.91599
Normal3	19750	6.91628
Normal3	20000	6.91642
Normal3	20250	6.91657
Normal3	20500	6.91686
Normal3	20750	6.917
Normal3	21000	6.91729
Normal3	21250	6.91758
Normal3	21500	6.91787
Normal3	21750	6.91801
Normal3	22000	6.9183
Normal3	22250	6.91859
Normal3	22500	6.91902
Normal3	22750	6.91916
Normal3	23000	6.91931
Normal3	23250	6.9196
Normal3	23500	6.91974
Normal3	23750	6.92003
Normal3	24000	6.92032
Normal3	24250	6.92046
Normal3	24500	6.92061
Normal3	24750	6.9209
Normal3	25000	6.92104
Normal3	25250	6.92119
Normal3	25500	6.92133
Normal3	25750	6.92162
Normal3	26000	6.92191
Normal3	26250	6.92205
Normal3	26500	6.92234
Normal3	26750	6.92263
Normal3	27000	6.92277
Normal3	27250	6.92277
Normal3	27500	6.92292
Normal3	27750	6.92306
Normal3	28000	6.92321
Normal3	28250	6.92335
Normal3	28500	6.92349
Normal3	28750	6.92364
Normal3	29000	6.92378
Normal3	29250	6.92393
Normal3	29500	6.92407
Normal3	29750	6.92407
Normal3	30000	6.92436
Normal3	30250	6.92436
Normal3	30500	6.9245
Normal3	30750	6.92465
Normal3	31000	6.92479
Normal3	31250	6.92508
Normal3	31500	6.92508
Normal3	31750	6.92523
Normal3	32000	6.92537
Normal3	32250	6.92551
Normal3	32500	6.92551
Normal3	32750	6.92566
Normal3	33000	6.92595
Normal3	33250	6.92609
Normal3	33500	6.92624
Normal3	33750	6.92624
Normal3	34000	6.92638
Normal3	34250	6.92652
Normal3	34500	6.92667
Normal3	34750	6.92667
Normal3	35000	6.92681
Normal3	35250	6.92696
Normal3	35500	6.9271
Normal3	35750	6.9271
Normal3	36000	6.92725
Normal3	36250	6.92739
Normal3	36500	6.92739
Normal3	36750	6.92739
Normal3	37000	6.92753
Normal3	37250	6.92753
Normal3	37500	6.92753
Normal3	37750	6.92768
Normal3	38000	6.92768
Normal3	38250	6.92782
Normal3	38500	6.92782
Normal3	38750	6.92797
Normal3	39000	6.92797
Normal3	39250	6.92811
Normal3	39500	6.92825
Normal3	39750	6.92825
Normal3	40000	6.9284
Normal3	40250	6.9284
Normal3	40500	6.92854
Normal3	40750	6.92869
Normal3	41000	6.92883
Normal3	41250	6.92883
Normal3	41500	6.92898
Normal3	41750	6.92912
Normal3	42000	6.92926
Normal3	42250	6.92926
Normal3	42500	6.92926
Normal3	42750	6.92926
Normal3	43000	6.92941
Normal3	43250	6.92941
Normal3	43500	6.92941
Normal3	43750	6.92955
Normal3	44000	6.92955
Normal3	44250	6.9297
Normal3	44500	6.9297
Normal3	44750	6.92984
Normal3	45000	6.92984
Normal3	45250	6.92999
Normal3	45500	6.92999
Normal3	45750	6.92999
Normal3	46000	6.92999
Normal3	46250	6.92999
Normal3	46500	6.93013
Normal3	46750	6.93013
Normal3	47000	6.93027
Normal3	47250	6.93027
Normal3	47500	6.93042
Normal3	47750	6.93042
Normal3	48000	6.93056
Normal3	48250	6.93056
Normal3	48500	6.93056
Normal3	48750	6.93071
Normal3	49000	6.93071
Normal3	49250	6.93085
Normal3	49500	6.93085
Normal3	49750	6.93085
Normal3	50000	6.93085
Normal3	50250	6.931
Normal3	50500	6.931
Normal3	50750	6.931
Normal3	51000	6.931
Normal3	51250	6.931
Normal3	51500	6.93114
Normal3	51750	6.93114
Normal3	52000	6.93114
Normal3	52250	6.93114
Normal3	52500	6.93128
Normal3	52750	6.93128
Normal3	53000	6.93143
Normal3	53250	6.93143
Normal3	53500	6.93143
Normal3	53750	6.93157
Normal3	54000	6.93157
Normal3	54250	6.93157
Normal3	54500	6.93172
Normal3	54750	6.93172
Normal3	55000	6.93172
Normal3	55250	6.93186
Normal3	55500	6.93186
Normal3	55750	6.93186
Normal3	56000	6.93201
Normal3	56250	6.93201
Normal3	56500	6.93201
Normal3	56750	6.93215
Normal3	57000	6.93215
Normal3	57250	6.93215
Normal3	57500	6.93229
Normal3	57750	6.93229
Normal3	58000	6.93229
Normal3	58250	6.93229
Normal3	58500	6.93229
Normal3	58750	6.93244
Normal3	59000	6.93244
Normal3	59250	6.93244
Normal3	59500	6.93244
Normal3	59750	6.93244
Normal3	60000	6.93244
Normal3	60250	6.93258
Normal3	60500	6.93258
Normal3	60750	6.93258
Normal3	61000	6.93258
Normal3	61250	6.93273
Normal3	61500	6.93273
Normal3	61750	6.93273
Normal3	62000	6.93273
Normal3	62250	6.93273
Normal3	62500	6.93287
Normal3	62750	6.93287
Normal3	63000	6.93287
Normal3	63250	6.93302
Normal3	63500	6.93302
Normal3	63750	6.93316
Normal3	64000	6.93316
Normal3	64250	6.93316
Normal3	64500	6.93316
Normal3	64750	6.93316
Normal3	65000	6.93316
Normal3	65250	6.9333
Normal3	65500	6.9333
Normal3	65750	6.93345
Normal3	66000	6.93345
Normal3	66250	6.93345
Normal3	66500	6.93345
Normal3	66750	6.93345
Normal3	67000	6.93345
Normal3	67250	6.93345
Normal3	67500	6.93359
Normal3	67750	6.93359
Normal3	68000	6.93359
Normal4	0	0
Normal4	250	6.0081
Normal4	500	6.28409
Normal4	750	6.39763
Normal4	1000	6.46443
Normal4	1250	6.50944
Normal4	1500	6.54046
Normal4	1750	6.5621
Normal4	2000	6.58143
Normal4	2250	6.59658
Normal4	2500	6.60798
Normal4	2750	6.61764
Normal4	3000	6.62601
Normal4	3250	6.63351
Normal4	3500	6.63986
Normal4	3750	6.64549
Normal4	4000	6.65082
Normal4	4250	6.6553
Normal4	4500	6.65977
Normal4	4750	6.66352
Normal4	5000	6.66713
Normal4	5250	6.67016
Normal4	5500	6.67275
Normal4	5750	6.67535
Normal4	6000	6.67766
Normal4	6250	6.67982
Normal4	6500	6.68199
Normal4	6750	6.68401
Normal4	7000	6.68574
Normal4	7250	6.68732
Normal4	7500	6.68934
Normal4	7750	6.69107
Normal4	8000	6.69266
Normal4	8250	6.69411
Normal4	8500	6.69555
Normal4	8750	6.69641
Normal4	9000	6.69757
Normal4	9250	6.69858
Normal4	9500	6.69988
Normal4	9750	6.70074
Normal4	10000	6.70146
Normal4	10250	6.70247
Normal4	10500	6.70348
Normal4	10750	6.70435
Normal4	11000	6.70507
Normal4	11250	6.70565
Normal4	11500	6.70622
Normal4	11750	6.70695
Normal4	12000	6.70752
Normal4	12250	6.70824
Normal4	12500	6.70868
Normal4	12750	6.7094
Normal4	13000	6.70998
Normal4	13250	6.7107
Normal4	13500	6.71142
Normal4	13750	6.71199
Normal4	14000	6.71243
Normal4	14250	6.713
Normal4	14500	6.71358
Normal4	14750	6.71416
Normal4	15000	6.71474
Normal4	15250	6.71517
Normal4	15500	6.71546
Normal4	15750	6.71589
Normal4	16000	6.71618
Normal4	16250	6.71676
Normal4	16500	6.7169
Normal4	16750	6.71733
Normal4	17000	6.71762
Normal4	17250	6.71805
Normal4	17500	6.71849
Normal4	17750	6.71877
Normal4	18000	6.71892
Normal4	18250	6.71935
Normal4	18500	6.71964
Normal4	18750	6.72007
Normal4	19000	6.72036
Normal4	19250	6.72065
Normal4	19500	6.72108
Normal4	19750	6.72137
Normal4	20000	6.72152
Normal4	20250	6.7218
Normal4	20500	6.72209
Normal4	20750	6.72238
Normal4	21000	6.72267
Normal4	21250	6.72296
Normal4	21500	6.72339
Normal4	21750	6.72354
Normal4	22000	6.72368
Normal4	22250	6.72368
Normal4	22500	6.72382
Normal4	22750	6.72411
Normal4	23000	6.72426
Normal4	23250	6.7244
Normal4	23500	6.72455
Normal4	23750	6.72455
Normal4	24000	6.72483
Normal4	24250	6.72498
Normal4	24500	6.72512
Normal4	24750	6.72527
Normal4	25000	6.72541
Normal4	25250	6.72541
Normal4	25500	6.7257
Normal4	25750	6.72584
Normal4	26000	6.72599
Normal4	26250	6.72613
Normal4	26500	6.72628
Normal4	26750	6.72642
Normal4	27000	6.72657
Normal4	27250	6.72671
Normal4	27500	6.727
Normal4	27750	6.727
Normal4	28000	6.72714
Normal4	28250	6.72729
Normal4	28500	6.72743
Normal4	28750	6.72758
Normal4	29000	6.72772
Normal4	29250	6.72772
Normal4	29500	6.72801
Normal4	29750	6.72815
Normal4	30000	6.72844
Normal4	30250	6.72844
Normal4	30500	6.72858
Normal4	30750	6.72858
Normal4	31000	6.72873
Normal4	31250	6.72887
Normal4	31500	6.72902
Normal4	31750	6.72916
Normal4	32000	6.72931
Normal4	32250	6.72945
Normal4	32500	6.72959
Normal4	32750	6.72974
Normal4	33000	6.72988
Normal4	33250	6.73003
Normal4	33500	6.73003
Normal4	33750	6.73017
Normal4	34000	6.73017
Normal4	34250	6.73032
Normal4	34500	6.7306
Normal4	34750	6.7306
Normal4	35000	6.73075
Normal4	35250	6.73075
Normal4	35500	6.73089
Normal4	35750	6.73089
Normal4	36000	6.73118
Normal4	36250	6.73118
Normal4	36500	6.73118
Normal4	36750	6.73133
Normal4	37000	6.73133
Normal4	37250	6.73147
Normal4	37500	6.73161
Normal4	37750	6.73161
Normal4	38000	6.73161
Normal4	38250	6.73161
Normal4	38500	6.73176
Normal4	38750	6.7319
Normal4	39000	6.7319
Normal4	39250	6.7319
Normal4	39500	6.7319
Normal4	39750	6.73205
Normal4	40000	6.73205
Normal4	40250	6.73205
Normal4	40500	6.73219
Normal4	40750	6.73219
Normal4	41000	6.73219
Normal4	41250	6.73219
Normal4	41500	6.73234
Normal4	41750	6.73234
Normal4	42000	6.73234
Normal4	42250	6.73248
Normal4	42500	6.73248
Normal4	42750	6.73262
Normal4	43000	6.73262
Normal4	43250	6.73262
Normal4	43500	6.73277
Normal4	43750	6.73291
Normal4	44000	6.73291
Normal4	44250	6.73291
Normal4	44500	6.73306
Normal4	44750	6.73306
Normal4	45000	6.7332
Normal4	45250	6.7332
Normal4	45500	6.7332
Normal4	45750	6.73335
Normal4	46000	6.73335
Normal4	46250	6.73335
Normal4	46500	6.73349
Normal4	46750	6.73349
Normal4	47000	6.73363
Normal4	47250	6.73363
Normal4	47500	6.73363
Normal4	47750	6.73363
Normal4	48000	6.73378
Normal4	48250	6.73378
Normal4	48500	6.73392
Normal4	48750	6.73392
Normal4	49000	6.73392
Normal4	49250	6.73392
Normal4	49500	6.73392
Normal4	49750	6.73407
Normal4	50000	6.73407
Normal4	50250	6.73407
Normal4	50500	6.73407
Normal4	50750	6.73421
Normal4	51000	6.73421
Normal4	51250	6.73436
Normal4	51500	6.73436
Normal4	51750	6.73436
Normal4	52000	6.73436
Normal4	52250	6.7345
Normal4	52500	6.7345
Normal4	52750	6.7345
Normal4	53000	6.73465
Normal4	53250	6.73465
Normal4	53500	6.73465
Normal4	53750	6.73479
Normal4	54000	6.73479
Normal4	54250	6.73479
Normal4	54500	6.73479
Normal4	54750	6.73493
Normal4	55000	6.73493
Normal4	55250	6.73493
Normal4	55500	6.73508
Normal4	55750	6.73508
Normal4	56000	6.73508
Normal4	56250	6.73508
Normal4	56500	6.73522
Normal4	56750	6.73522
Normal4	57000	6.73522
Normal4	57250	6.73522
Normal4	57500	6.73522
Normal4	57750	6.73537
Normal4	58000	6.73537
Normal4	58250	6.73551
Normal4	58500	6.73551
Normal4	58750	6.73551
Normal4	59000	6.73551
Normal4	59250	6.73551
Normal4	59500	6.73566
Normal4	59750	6.73566
Normal4	60000	6.73566
Normal4	60250	6.7358
Normal4	60500	6.7358
Normal4	60750	6.7358
Normal4	61000	6.7358
Normal4	61250	6.73594
Normal4	61500	6.73594
Normal4	61750	6.73594
Normal4	62000	6.73609
Normal4	62250	6.73609
Normal4	62500	6.73609
Normal4	62750	6.73609
Normal4	63000	6.73623
Normal4	63250	6.73623
Normal4	63500	6.73623
Normal4	63750	6.73638
Normal4	64000	6.73638
Normal4	64250	6.73638
Normal4	64500	6.73638
Normal4	64750	6.73638
Normal4	65000	6.73638
Normal4	65250	6.73638
Normal5	0	0
Normal5	250	6.38335
Normal5	500	6.71459
Normal5	750	6.85035
Normal5	1000	6.92681
Normal5	1250	6.97875
Normal5	1500	7.01381
Normal5	1750	7.04107
Normal5	2000	7.06127
Normal5	2250	7.07801
Normal5	2500	7.09186
Normal5	2750	7.10441
Normal5	3000	7.11422
Normal5	3250	7.12273
Normal5	3500	7.12994
Normal5	3750	7.136
Normal5	4000	7.14163
Normal5	4250	7.14726
Normal5	4500	7.15187
Normal5	4750	7.15591
Normal5	5000	7.15937
Normal5	5250	7.16298
Normal5	5500	7.16673
Normal5	5750	7.16947
Normal5	6000	7.17178
Normal5	6250	7.17438
Normal5	6500	7.17683
Normal5	6750	7.17899
Normal5	7000	7.18058
Normal5	7250	7.1826
Normal5	7500	7.18462
Normal5	7750	7.18606
Normal5	8000	7.1878
Normal5	8250	7.18938
Normal5	8500	7.19097
Normal5	8750	7.19212
Normal5	9000	7.19328
Normal5	9250	7.19443
Normal5	9500	7.1953
Normal5	9750	7.19645
Normal5	10000	7.19761
Normal5	10250	7.1989
Normal5	10500	7.19977
Normal5	10750	7.20064
Normal5	11000	7.2015
Normal5	11250	7.20237
Normal5	11500	7.20323
Normal5	11750	7.20395
Normal5	12000	7.20482
Normal5	12250	7.20525
Normal5	12500	7.20583
Normal5	12750	7.20626
Normal5	13000	7.20698
Normal5	13250	7.20756
Normal5	13500	7.20814
Normal5	13750	7.20871
Normal5	14000	7.20929
Normal5	14250	7.20987
Normal5	14500	7.2103
Normal5	14750	7.21088
Normal5	15000	7.21145
Normal5	15250	7.21203
Normal5	15500	7.21246
Normal5	15750	7.21275
Normal5	16000	7.21347
Normal5	16250	7.21376
Normal5	16500	7.21448
Normal5	16750	7.21463
Normal5	17000	7.21506
Normal5	17250	7.21564
Normal5	17500	7.21607
Normal5	17750	7.2165
Normal5	18000	7.21694
Normal5	18250	7.21723
Normal5	18500	7.2178
Normal5	18750	7.21809
Normal5	19000	7.21824
Normal5	19250	7.21852
Normal5	19500	7.21896
Normal5	19750	7.2191
Normal5	20000	7.21939
Normal5	20250	7.21982
Normal5	20500	7.22011
Normal5	20750	7.2204
Normal5	21000	7.22054
Normal5	21250	7.22083
Normal5	21500	7.22098
Normal5	21750	7.22127
Normal5	22000	7.22155
Normal5	22250	7.2217
Normal5	22500	7.22199
Normal5	22750	7.22213
Normal5	23000	7.22242
Normal5	23250	7.22271
Normal5	23500	7.22285
Normal5	23750	7.22314
Normal5	24000	7.22343
Normal5	24250	7.22357
Normal5	24500	7.22372
Normal5	24750	7.22415
Normal5	25000	7.22429
Normal5	25250	7.22458
Normal5	25500	7.22473
Normal5	25750	7.22502
Normal5	26000	7.22516
Normal5	26250	7.22545
Normal5	26500	7.22545
Normal5	26750	7.22574
Normal5	27000	7.22574
Normal5	27250	7.22617
Normal5	27500	7.22617
Normal5	27750	7.22631
Normal5	28000	7.22646
Normal5	28250	7.2266
Normal5	28500	7.22675
Normal5	28750	7.22689
Normal5	29000	7.22704
Normal5	29250	7.22718
Normal5	29500	7.22747
Normal5	29750	7.22761
Normal5	30000	7.22776
Normal5	30250	7.2279
Normal5	30500	7.22805
Normal5	30750	7.22819
Normal5	31000	7.22834
Normal5	31250	7.22848
Normal5	31500	7.22862
Normal5	31750	7.22877
Normal5	32000	7.22877
Normal5	32250	7.22906
Normal5	32500	7.2292
Normal5	32750	7.2292
Normal5	33000	7.22935
Normal5	33250	7.22949
Normal5	33500	7.22963
Normal5	33750	7.22978
Normal5	34000	7.22992
Normal5	34250	7.23007
Normal5	34500	7.23021
Normal5	34750	7.23021
Normal5	35000	7.2305
Normal5	35250	7.2305
Normal5	35500	7.23064
Normal5	35750	7.23079
Normal5	36000	7.23079
Normal5	36250	7.23093
Normal5	36500	7.23108
Normal5	36750	7.23108
Normal5	37000	7.23122
Normal5	37250	7.23137
Normal5	37500	7.23151
Normal5	37750	7.23151
Normal5	38000	7.23165
Normal5	38250	7.2318
Normal5	38500	7.23194
Normal5	38750	7.23209
Normal5	39000	7.23209
Normal5	39250	7.23223
Normal5	39500	7.23223
Normal5	39750	7.23238
Normal5	40000	7.23238
Normal5	40250	7.23252
Normal5	40500	7.23266
Normal5	40750	7.23266
Normal5	41000	7.23281
Normal5	41250	7.23295
Normal5	41500	7.23295
Normal5	41750	7.2331
Normal5	42000	7.2331
Normal5	42250	7.23324
Normal5	42500	7.23338
Normal5	42750	7.23338
Normal5	43000	7.23338
Normal5	43250	7.23353
Normal5	43500	7.23353
Normal5	43750	7.23367
Normal5	44000	7.23367
Normal5	44250	7.23382
Normal5	44500	7.23396
Normal5	44750	7.23396
Normal5	45000	7.23396
Normal5	45250	7.23411
Normal5	45500	7.23411
Normal5	45750	7.23425
Normal5	46000	7.23439
Normal5	46250	7.23454
Normal5	46500	7.23454
Normal5	46750	7.23454
Normal5	47000	7.23468
Normal5	47250	7.23468
Normal5	47500	7.23468
Normal5	47750	7.23483
Normal5	48000	7.23483
Normal5	48250	7.23497
Normal5	48500	7.23497
Normal5	48750	7.23512
Normal5	49000	7.23512
Normal5	49250	7.23512
Normal5	49500	7.23526
Normal5	49750	7.2354
Normal5	50000	7.2354
Normal5	50250	7.23555
Normal5	50500	7.23555
Normal5	50750	7.23555
Normal5	51000	7.23555
Normal5	51250	7.23569
Normal5	51500	7.23569
Normal5	51750	7.23569
Normal5	52000	7.23569
Normal5	52250	7.23584
Normal5	52500	7.23584
Normal5	52750	7.23598
Normal5	53000	7.23598
Normal5	53250	7.23598
Normal5	53500	7.23613
Normal5	53750	7.23613
Normal5	54000	7.23613
Normal5	54250	7.23613
Normal5	54500	7.23613
Normal5	54750	7.23613
Normal5	55000	7.23613
Normal5	55250	7.23627
Normal5	55500	7.23627
Normal5	55750	7.23627
Normal5	56000	7.23627
Normal5	56250	7.23627
Normal5	56500	7.23641
Normal5	56750	7.23641
Normal5	57000	7.23641
Normal5	57250	7.23641
Normal5	57500	7.23641
Normal5	57750	7.23641
Normal5	58000	7.23656
Normal5	58250	7.23656
Normal5	58500	7.23656
Normal5	58750	7.23656
Normal5	59000	7.23656
Normal5	59250	7.2367
Normal5	59500	7.2367
Normal5	59750	7.2367
Normal5	60000	7.2367
Normal5	60250	7.2367
Normal5	60500	7.2367
Normal5	60750	7.23685
Normal5	61000	7.23685
Normal5	61250	7.23685
Normal5	61500	7.23685
Normal5	61750	7.23685
Normal5	62000	7.23685
Normal5	62250	7.23699
Normal5	62500	7.23699
Normal5	62750	7.23699
DSS1	0	0
DSS1	250	6.02599
DSS1	500	6.28611
DSS1	750	6.39431
DSS1	1000	6.45476
DSS1	1250	6.49472
DSS1	1500	6.52372
DSS1	1750	6.54608
DSS1	2000	6.56239
DSS1	2250	6.57422
DSS1	2500	6.58547
DSS1	2750	6.59528
DSS1	3000	6.60336
DSS1	3250	6.61086
DSS1	3500	6.61692
DSS1	3750	6.62197
DSS1	4000	6.62673
DSS1	4250	6.63106
DSS1	4500	6.63539
DSS1	4750	6.63914
DSS1	5000	6.6426
DSS1	5250	6.64578
DSS1	5500	6.64852
DSS1	5750	6.65111
DSS1	6000	6.65313
DSS1	6250	6.6553
DSS1	6500	6.65703
DSS1	6750	6.65876
DSS1	7000	6.6602
DSS1	7250	6.6615
DSS1	7500	6.66309
DSS1	7750	6.66467
DSS1	8000	6.66597
DSS1	8250	6.66684
DSS1	8500	6.66828
DSS1	8750	6.66929
DSS1	9000	6.6703
DSS1	9250	6.67102
DSS1	9500	6.67189
DSS1	9750	6.67261
DSS1	10000	6.67376
DSS1	10250	6.67448
DSS1	10500	6.67535
DSS1	10750	6.67593
DSS1	11000	6.67679
DSS1	11250	6.67766
DSS1	11500	6.67838
DSS1	11750	6.67896
DSS1	12000	6.67953
DSS1	12250	6.68011
DSS1	12500	6.68069
DSS1	12750	6.68126
DSS1	13000	6.68184
DSS1	13250	6.68227
DSS1	13500	6.68271
DSS1	13750	6.68328
DSS1	14000	6.68386
DSS1	14250	6.68415
DSS1	14500	6.68473
DSS1	14750	6.68516
DSS1	15000	6.68545
DSS1	15250	6.68574
DSS1	15500	6.68588
DSS1	15750	6.68631
DSS1	16000	6.6866
DSS1	16250	6.68689
DSS1	16500	6.68732
DSS1	16750	6.68747
DSS1	17000	6.68776
DSS1	17250	6.6879
DSS1	17500	6.68819
DSS1	17750	6.68833
DSS1	18000	6.68877
DSS1	18250	6.68906
DSS1	18500	6.68934
DSS1	18750	6.68949
DSS1	19000	6.68978
DSS1	19250	6.68992
DSS1	19500	6.69006
DSS1	19750	6.69035
DSS1	20000	6.69064
DSS1	20250	6.69093
DSS1	20500	6.69122
DSS1	20750	6.69136
DSS1	21000	6.69165
DSS1	21250	6.69194
DSS1	21500	6.69223
DSS1	21750	6.69252
DSS1	22000	6.69281
DSS1	22250	6.69295
DSS1	22500	6.69324
DSS1	22750	6.69338
DSS1	23000	6.69353
DSS1	23250	6.69382
DSS1	23500	6.69396
DSS1	23750	6.69411
DSS1	24000	6.69439
DSS1	24250	6.69454
DSS1	24500	6.69468
DSS1	24750	6.69483
DSS1	25000	6.69483
DSS1	25250	6.69512
DSS1	25500	6.69526
DSS1	25750	6.69555
DSS1	26000	6.69569
DSS1	26250	6.69598
DSS1	26500	6.69627
DSS1	26750	6.69627
DSS1	27000	6.69641
DSS1	27250	6.69656
DSS1	27500	6.6967
DSS1	27750	6.69685
DSS1	28000	6.69699
DSS1	28250	6.69714
DSS1	28500	6.69728
DSS1	28750	6.69728
DSS1	29000	6.69742
DSS1	29250	6.69757
DSS1	29500	6.69757
DSS1	29750	6.69771
DSS1	30000	6.69786
DSS1	30250	6.698
DSS1	30500	6.698
DSS1	30750	6.69815
DSS1	31000	6.69829
DSS1	31250	6.69829
DSS1	31500	6.69829
DSS1	31750	6.69843
DSS1	32000	6.69843
DSS1	32250	6.69858
DSS1	32500	6.69872
DSS1	32750	6.69887
DSS1	33000	6.69901
DSS1	33250	6.69915
DSS1	33500	6.69915
DSS1	33750	6.69915
DSS1	34000	6.6993
DSS1	34250	6.69944
DSS1	34500	6.69944
DSS1	34750	6.69959
DSS1	35000	6.69973
DSS1	35250	6.69973
DSS1	35500	6.69988
DSS1	35750	6.70002
DSS1	36000	6.70016
DSS1	36250	6.70031
DSS1	36500	6.70031
DSS1	36750	6.70045
DSS1	37000	6.7006
DSS1	37250	6.70074
DSS1	37500	6.70074
DSS1	37750	6.70089
DSS1	38000	6.70089
DSS1	38250	6.70103
DSS1	38500	6.70117
DSS1	38750	6.70117
DSS1	39000	6.70132
DSS1	39250	6.70132
DSS1	39500	6.70146
DSS1	39750	6.70146
DSS1	40000	6.70161
DSS1	40250	6.70161
DSS1	40500	6.70175
DSS1	40750	6.70175
DSS1	41000	6.70175
DSS1	41250	6.70175
DSS1	41500	6.70175
DSS1	41750	6.7019
DSS1	42000	6.7019
DSS1	42250	6.70204
DSS1	42500	6.70204
DSS1	42750	6.70204
DSS1	43000	6.70204
DSS1	43250	6.70204
DSS1	43500	6.70218
DSS1	43750	6.70233
DSS1	44000	6.70233
DSS1	44250	6.70247
DSS1	44500	6.70247
DSS1	44750	6.70247
DSS1	45000	6.70262
DSS1	45250	6.70276
DSS1	45500	6.70276
DSS1	45750	6.70276
DSS1	46000	6.70276
DSS1	46250	6.70291
DSS1	46500	6.70291
DSS1	46750	6.70291
DSS1	47000	6.70305
DSS1	47250	6.70305
DSS1	47500	6.70319
DSS1	47750	6.70319
DSS1	48000	6.70334
DSS1	48250	6.70334
DSS1	48500	6.70348
DSS1	48750	6.70348
DSS1	49000	6.70348
DSS1	49250	6.70363
DSS1	49500	6.70363
DSS1	49750	6.70363
DSS1	50000	6.70363
DSS1	50250	6.70377
DSS1	50500	6.70377
DSS1	50750	6.70392
DSS1	51000	6.70392
DSS1	51250	6.70406
DSS1	51500	6.70406
DSS1	51750	6.7042
DSS1	52000	6.7042
DSS1	52250	6.7042
DSS1	52500	6.70435
DSS1	52750	6.70435
DSS1	53000	6.70435
DSS1	53250	6.70435
DSS1	53500	6.70449
DSS1	53750	6.70449
DSS1	54000	6.70464
DSS1	54250	6.70464
DSS1	54500	6.70464
DSS1	54750	6.70464
DSS1	55000	6.70464
DSS1	55250	6.70478
DSS1	55500	6.70478
DSS1	55750	6.70478
DSS1	56000	6.70478
DSS1	56250	6.70478
DSS1	56500	6.70493
DSS1	56750	6.70493
DSS1	57000	6.70493
DSS1	57250	6.70493
DSS1	57500	6.70507
DSS1	57750	6.70507
DSS1	58000	6.70507
DSS1	58250	6.70507
DSS1	58500	6.70507
DSS1	58750	6.70507
DSS1	59000	6.70507
DSS1	59250	6.70521
DSS1	59500	6.70521
DSS1	59750	6.70521
DSS1	60000	6.70536
DSS1	60250	6.70536
DSS1	60500	6.70536
DSS1	60750	6.70536
DSS1	61000	6.70536
DSS1	61250	6.7055
DSS1	61500	6.7055
DSS1	61750	6.7055
DSS1	62000	6.7055
DSS1	62250	6.7055
DSS1	62500	6.7055
DSS1	62750	6.70565
DSS1	63000	6.70565
DSS1	63250	6.70565
DSS1	63500	6.70565
DSS1	63750	6.70579
DSS1	64000	6.70579
DSS1	64250	6.70579
DSS1	64500	6.70594
DSS1	64750	6.70594
DSS1	65000	6.70608
DSS1	65250	6.70608
DSS1	65500	6.70608
DSS1	65750	6.70608
DSS1	66000	6.70608
DSS1	66250	6.70608
DSS1	66500	6.70622
DSS1	66750	6.70622
DSS1	67000	6.70622
DSS1	67250	6.70622
DSS1	67500	6.70622
DSS1	67750	6.70622
DSS1	68000	6.70622
DSS1	68250	6.70622
DSS1	68500	6.70622
DSS1	68750	6.70637
DSS1	69000	6.70637
DSS1	69250	6.70637
DSS1	69500	6.70637
DSS2	0	0
DSS2	250	6.18801
DSS2	500	6.4738
DSS2	750	6.59817
DSS2	1000	6.66713
DSS2	1250	6.71243
DSS2	1500	6.74474
DSS2	1750	6.76927
DSS2	2000	6.78629
DSS2	2250	6.80072
DSS2	2500	6.81313
DSS2	2750	6.82438
DSS2	3000	6.83333
DSS2	3250	6.84068
DSS2	3500	6.84746
DSS2	3750	6.85367
DSS2	4000	6.85886
DSS2	4250	6.86348
DSS2	4500	6.86752
DSS2	4750	6.87112
DSS2	5000	6.87444
DSS2	5250	6.87747
DSS2	5500	6.88036
DSS2	5750	6.88295
DSS2	6000	6.88555
DSS2	6250	6.88829
DSS2	6500	6.89017
DSS2	6750	6.89219
DSS2	7000	6.89406
DSS2	7250	6.89579
DSS2	7500	6.89738
DSS2	7750	6.89897
DSS2	8000	6.90027
DSS2	8250	6.90128
DSS2	8500	6.90243
DSS2	8750	6.90344
DSS2	9000	6.90488
DSS2	9250	6.90632
DSS2	9500	6.90719
DSS2	9750	6.9082
DSS2	10000	6.90892
DSS2	10250	6.90935
DSS2	10500	6.91036
DSS2	10750	6.91123
DSS2	11000	6.9121
DSS2	11250	6.91253
DSS2	11500	6.91325
DSS2	11750	6.91354
DSS2	12000	6.91426
DSS2	12250	6.91498
DSS2	12500	6.9157
DSS2	12750	6.91614
DSS2	13000	6.91657
DSS2	13250	6.91729
DSS2	13500	6.91787
DSS2	13750	6.91844
DSS2	14000	6.91888
DSS2	14250	6.91916
DSS2	14500	6.91974
DSS2	14750	6.92032
DSS2	15000	6.92061
DSS2	15250	6.9209
DSS2	15500	6.92133
DSS2	15750	6.92176
DSS2	16000	6.9222
DSS2	16250	6.92248
DSS2	16500	6.92306
DSS2	16750	6.92349
DSS2	17000	6.92393
DSS2	17250	6.9245
DSS2	17500	6.92479
DSS2	17750	6.92508
DSS2	18000	6.92551
DSS2	18250	6.9258
DSS2	18500	6.92624
DSS2	18750	6.92652
DSS2	19000	6.92696
DSS2	19250	6.92725
DSS2	19500	6.92753
DSS2	19750	6.92782
DSS2	20000	6.92825
DSS2	20250	6.9284
DSS2	20500	6.92883
DSS2	20750	6.92898
DSS2	21000	6.92926
DSS2	21250	6.9297
DSS2	21500	6.92984
DSS2	21750	6.93013
DSS2	22000	6.93042
DSS2	22250	6.93071
DSS2	22500	6.93085
DSS2	22750	6.93114
DSS2	23000	6.93143
DSS2	23250	6.93157
DSS2	23500	6.93186
DSS2	23750	6.93201
DSS2	24000	6.93215
DSS2	24250	6.93244
DSS2	24500	6.93258
DSS2	24750	6.93287
DSS2	25000	6.93302
DSS2	25250	6.9333
DSS2	25500	6.93359
DSS2	25750	6.93359
DSS2	26000	6.93388
DSS2	26250	6.93388
DSS2	26500	6.93403
DSS2	26750	6.93431
DSS2	27000	6.93446
DSS2	27250	6.93446
DSS2	27500	6.9346
DSS2	27750	6.93475
DSS2	28000	6.93504
DSS2	28250	6.93518
DSS2	28500	6.93518
DSS2	28750	6.93532
DSS2	29000	6.93547
DSS2	29250	6.93576
DSS2	29500	6.93576
DSS2	29750	6.9359
DSS2	30000	6.93605
DSS2	30250	6.93605
DSS2	30500	6.93619
DSS2	30750	6.93633
DSS2	31000	6.93633
DSS2	31250	6.93662
DSS2	31500	6.93662
DSS2	31750	6.93677
DSS2	32000	6.93677
DSS2	32250	6.93705
DSS2	32500	6.93705
DSS2	32750	6.9372
DSS2	33000	6.9372
DSS2	33250	6.93734
DSS2	33500	6.93749
DSS2	33750	6.93749
DSS2	34000	6.93763
DSS2	34250	6.93792
DSS2	34500	6.93792
DSS2	34750	6.93806
DSS2	35000	6.93806
DSS2	35250	6.93806
DSS2	35500	6.93821
DSS2	35750	6.93835
DSS2	36000	6.9385
DSS2	36250	6.9385
DSS2	36500	6.93864
DSS2	36750	6.93879
DSS2	37000	6.93879
DSS2	37250	6.93893
DSS2	37500	6.93893
DSS2	37750	6.93907
DSS2	38000	6.93907
DSS2	38250	6.93922
DSS2	38500	6.93936
DSS2	38750	6.93936
DSS2	39000	6.93951
DSS2	39250	6.93951
DSS2	39500	6.93965
DSS2	39750	6.93965
DSS2	40000	6.9398
DSS2	40250	6.9398
DSS2	40500	6.93994
DSS2	40750	6.93994
DSS2	41000	6.93994
DSS2	41250	6.94008
DSS2	41500	6.94008
DSS2	41750	6.94008
DSS2	42000	6.94023
DSS2	42250	6.94023
DSS2	42500	6.94037
DSS2	42750	6.94052
DSS2	43000	6.94066
DSS2	43250	6.94066
DSS2	43500	6.94066
DSS2	43750	6.94066
DSS2	44000	6.94066
DSS2	44250	6.94081
DSS2	44500	6.94081
DSS2	44750	6.94081
DSS2	45000	6.94095
DSS2	45250	6.94095
DSS2	45500	6.94109
DSS2	45750	6.94109
DSS2	46000	6.94124
DSS2	46250	6.94124
DSS2	46500	6.94138
DSS2	46750	6.94138
DSS2	47000	6.94138
DSS2	47250	6.94153
DSS2	47500	6.94153
DSS2	47750	6.94153
DSS2	48000	6.94167
DSS2	48250	6.94167
DSS2	48500	6.94182
DSS2	48750	6.94182
DSS2	49000	6.94182
DSS2	49250	6.94182
DSS2	49500	6.94182
DSS2	49750	6.94196
DSS2	50000	6.94196
DSS2	50250	6.9421
DSS2	50500	6.9421
DSS2	50750	6.9421
DSS2	51000	6.9421
DSS2	51250	6.9421
DSS2	51500	6.94225
DSS2	51750	6.94225
DSS2	52000	6.94225
DSS2	52250	6.94239
DSS2	52500	6.94239
DSS2	52750	6.94239
DSS2	53000	6.94239
DSS2	53250	6.94254
DSS2	53500	6.94254
DSS2	53750	6.94254
DSS2	54000	6.94254
DSS2	54250	6.94254
DSS2	54500	6.94268
DSS2	54750	6.94268
DSS2	55000	6.94268
DSS2	55250	6.94268
DSS2	55500	6.94283
DSS2	55750	6.94283
DSS2	56000	6.94283
DSS2	56250	6.94283
DSS2	56500	6.94283
DSS2	56750	6.94297
DSS2	57000	6.94297
DSS2	57250	6.94311
DSS2	57500	6.94311
DSS2	57750	6.94311
DSS2	58000	6.94311
DSS2	58250	6.94311
DSS2	58500	6.94326
DSS2	58750	6.94326
DSS2	59000	6.94326
DSS2	59250	6.94326
DSS2	59500	6.94326
DSS2	59750	6.94326
DSS2	60000	6.94326
DSS2	60250	6.9434
DSS2	60500	6.9434
DSS2	60750	6.9434
DSS2	61000	6.9434
DSS2	61250	6.94355
DSS2	61500	6.94355
DSS2	61750	6.94355
DSS2	62000	6.94355
DSS2	62250	6.94355
DSS2	62500	6.94369
DSS2	62750	6.94369
DSS2	63000	6.94369
DSS2	63250	6.94369
DSS2	63500	6.94369
DSS2	63750	6.94369
DSS2	64000	6.94384
DSS2	64250	6.94384
DSS2	64500	6.94384
DSS2	64750	6.94384
DSS2	65000	6.94384
DSS2	65250	6.94398
DSS2	65500	6.94398
DSS2	65750	6.94398
DSS2	66000	6.94412
DSS2	66250	6.94412
DSS2	66500	6.94412
DSS2	66750	6.94412
DSS2	67000	6.94427
DSS2	67250	6.94427
DSS2	67500	6.94427
DSS2	67750	6.94427
DSS2	68000	6.94427
DSS2	68250	6.94427
DSS2	68500	6.94427
DSS3	0	0
DSS3	250	5.98834
DSS3	500	6.24499
DSS3	750	6.35536
DSS3	1000	6.4174
DSS3	1250	6.45923
DSS3	1500	6.48708
DSS3	1750	6.50785
DSS3	2000	6.52517
DSS3	2250	6.53873
DSS3	2500	6.55012
DSS3	2750	6.56109
DSS3	3000	6.56917
DSS3	3250	6.57595
DSS3	3500	6.58172
DSS3	3750	6.58735
DSS3	4000	6.59196
DSS3	4250	6.59586
DSS3	4500	6.59932
DSS3	4750	6.60264
DSS3	5000	6.60625
DSS3	5250	6.60928
DSS3	5500	6.61173
DSS3	5750	6.61375
DSS3	6000	6.61606
DSS3	6250	6.61793
DSS3	6500	6.61981
DSS3	6750	6.62168
DSS3	7000	6.62356
DSS3	7250	6.62529
DSS3	7500	6.62673
DSS3	7750	6.62789
DSS3	8000	6.62947
DSS3	8250	6.63106
DSS3	8500	6.63221
DSS3	8750	6.63322
DSS3	9000	6.63423
DSS3	9250	6.63524
DSS3	9500	6.63611
DSS3	9750	6.63697
DSS3	10000	6.6377
DSS3	10250	6.63856
DSS3	10500	6.63971
DSS3	10750	6.64058
DSS3	11000	6.64145
DSS3	11250	6.64246
DSS3	11500	6.64318
DSS3	11750	6.6439
DSS3	12000	6.64433
DSS3	12250	6.64505
DSS3	12500	6.64592
DSS3	12750	6.6465
DSS3	13000	6.64679
DSS3	13250	6.64751
DSS3	13500	6.64794
DSS3	13750	6.64837
DSS3	14000	6.64866
DSS3	14250	6.64909
DSS3	14500	6.64938
DSS3	14750	6.64981
DSS3	15000	6.64996
DSS3	15250	6.65039
DSS3	15500	6.65082
DSS3	15750	6.65126
DSS3	16000	6.6514
DSS3	16250	6.65183
DSS3	16500	6.65212
DSS3	16750	6.65241
DSS3	17000	6.65284
DSS3	17250	6.65299
DSS3	17500	6.65342
DSS3	17750	6.65371
DSS3	18000	6.65414
DSS3	18250	6.65458
DSS3	18500	6.65486
DSS3	18750	6.65501
DSS3	19000	6.6553
DSS3	19250	6.65544
DSS3	19500	6.65573
DSS3	19750	6.65587
DSS3	20000	6.65616
DSS3	20250	6.65645
DSS3	20500	6.65674
DSS3	20750	6.65703
DSS3	21000	6.65732
DSS3	21250	6.65746
DSS3	21500	6.65775
DSS3	21750	6.65804
DSS3	22000	6.65818
DSS3	22250	6.65833
DSS3	22500	6.65862
DSS3	22750	6.65876
DSS3	23000	6.65905
DSS3	23250	6.65919
DSS3	23500	6.65934
DSS3	23750	6.65948
DSS3	24000	6.65977
DSS3	24250	6.65977
DSS3	24500	6.65991
DSS3	24750	6.66006
DSS3	25000	6.66035
DSS3	25250	6.66035
DSS3	25500	6.66049
DSS3	25750	6.66063
DSS3	26000	6.66078
DSS3	26250	6.66092
DSS3	26500	6.66107
DSS3	26750	6.66121
DSS3	27000	6.66136
DSS3	27250	6.66164
DSS3	27500	6.66179
DSS3	27750	6.66193
DSS3	28000	6.66193
[truncated: 3,519 more rows]

## Sheet: userLabel.pca
group	axis1	axis2	axis3	axis4	axis5	axis6	axis7	axis8	axis9	axis10	axis11	axis12	axis13	axis14	axis15	axis16	axis17	axis18	axis19	axis20
Normal1	0.0190192	-0.00677875	-0.00487857	-0.00471448	0.00569755	-0.00772905	0.000108367	0.00749135	-0.00318946	-0.00861581	-0.00254593	0.00946753	0.0257477	-0.00760863	0.0037947	0.0131775	0.0141602	-0.00271185	-0.000830801	0.01
Normal2	0.0104787	0.000749125	0.00269348	-0.00443019	0.00783385	-0.00957121	0.00357575	0.00122316	-0.00315515	-0.00895866	0.0164361	0.0198078	-0.020242	6.53044e-05	-0.00700118	-0.0169327	0.00627383	-0.00752888	0.00112513	0.01
Normal3	-0.00350052	-0.00915125	-0.00190478	0.00590624	0.00956156	-0.0172253	-0.0132189	0.0174928	-0.010626	0.00100568	-0.0168197	-0.00159078	-0.00431661	0.0160956	-0.00585216	1.02347e-05	-0.013593	-0.000164396	-0.000719197	0.01
Normal4	0.0234032	-0.00453216	-0.00591578	-0.00101647	-0.00287567	0.0128875	-0.00448624	-0.0135303	0.00946681	0.00204826	-0.00740547	-0.0128031	-0.00701565	0.0119981	-0.0148367	0.00432787	-0.000317297	-0.0130853	0.00149481	0.01
Normal5	0.0182611	-0.00704515	-0.000815021	-0.000468759	-0.00217828	0.00695836	-0.0018861	0.0018766	0.00132736	0.00072237	-0.00515439	-0.00241507	-0.00809247	-0.0110375	0.019739	-0.0106394	-0.0123504	0.0240208	-0.00119052	0.01
DSS1	-0.00102563	0.0163736	-0.00996319	-0.0093406	-4.0116e-05	-0.0172587	0.0104064	0.00305721	0.0215282	0.0210751	-0.008807	0.00247241	-0.00347174	-0.00341749	0.00298016	0.00180137	0.000733293	-0.00102147	-0.000314503	0.01
DSS2	-0.00187686	0.0072195	-0.00771376	-0.0152724	-0.0126917	0.0165279	-0.00563263	0.0205553	-0.0119793	0.0106829	0.0102981	-0.000681816	0.00658693	-0.00558638	-0.00719962	-0.00577285	-0.00858664	-0.00804257	0.000893378	0.01
DSS3	-0.00709971	0.00779438	-0.0145405	0.0167053	-0.01332	0.00206471	-0.00899426	0.00426425	0.0119454	-0.0180767	0.00228615	0.00322097	-0.00242306	-0.00124706	0.00116772	0.00143004	0.00160665	-0.000812432	-0.0227694	0.01
DSS4	-0.0048978	0.0138583	-0.00665408	0.00989372	-0.000260493	0.00198063	-0.00877665	-0.00132098	0.00257907	-0.011249	-0.000710652	-2.69964e-05	0.000830461	-0.00180773	0.00242515	0.00102765	0.00130273	0.00282096	0.0361218	0.01
DSS5	0.000327367	0.0264639	0.00825398	-0.00404687	0.0227979	0.00498559	-0.00834341	-0.0104597	-0.0118789	-0.00111991	-0.00061632	-0.00704904	0.00178341	-0.00168725	0.000994685	0.00350204	-0.000652051	0.00377244	-0.0128478	0.01
LATFP1	-0.00100934	-0.00498471	-0.00893806	0.0182901	0.00266406	-0.00854952	0.0155334	-0.0120406	-0.0085573	0.00610499	0.00898443	-0.0065099	0.0106779	-0.0135217	-0.0154326	-0.00568737	-0.0136942	0.00211626	-0.000538712	0.01
LATFP2	-0.00789233	-0.0102253	0.0130069	-0.010813	0.00625554	-0.00660104	-0.00971149	0.000425161	0.0213809	-0.00668458	0.0162178	-0.0157836	0.0118898	0.00158349	0.000843554	-0.00911175	-0.00520415	-0.00098339	0.000477101	0.01
LATFP3	-0.016424	-0.0124709	-0.0163951	-0.00795546	0.0193874	0.0178501	0.0172105	0.000751409	0.00214368	-0.00647697	-0.00586499	0.00170887	-0.00288521	0.00465462	0.00512767	-0.000539975	0.00320478	-0.000817493	-4.73777e-05	0.01
LATFP4	-0.00639784	-0.00289157	0.00523358	-0.00711959	-0.012779	-0.00979786	0.00521914	-0.00352749	-0.0132618	-0.00867894	-0.0131307	-0.0191642	-0.00875703	-0.0140242	0.00749598	-0.00542314	0.0122711	-0.0131573	-0.00032128	0.01
LATFP5	-0.011325	-0.0115369	0.00363563	-0.00948605	-0.00487672	0.00010919	-0.0152073	-0.0181827	-0.000465575	0.00479877	-0.00247034	0.0188803	-0.00553593	-0.0127566	-0.00207366	0.0164522	-0.00963217	-0.00167885	0.000120783	0.01
HATFP1	-0.00496955	-0.00680879	0.0114534	0.0113791	0.00281417	0.00791458	-0.00457699	0.0104842	0.00360736	0.0138211	-0.000425836	-0.00288055	-0.00656972	-0.00783925	-0.0150057	0.00292307	0.0246256	0.0144744	-0.000278678	0.01
HATFP2	-0.00367533	-0.00185793	0.004467	0.0110641	-0.00459531	0.00472184	-0.00534348	-0.0113276	-0.00349292	0.015418	-0.00430991	0.0107223	0.0136575	0.0135144	0.015206	-0.0199558	0.00838111	-0.00926981	-0.00146126	0.01
HATFP3	-8.71553e-05	0.00638558	0.026332	0.00322222	-0.00728129	0.00820786	0.0192535	0.00635682	0.00614794	-0.0099316	-0.012529	0.00990523	0.0051124	0.00266968	-0.00639157	0.00246249	-0.0121755	-0.00197515	0.000343591	0.01
HATFP4	-0.0033607	0.00184967	-0.00318314	-0.0129168	-0.0158784	-0.00703986	0.00715617	-0.00936877	-0.0092791	-0.00380942	0.00680186	-0.00108524	0.00274023	0.0220644	-0.0052884	0.00441691	0.00651113	0.0231331	-0.000476167	0.01
HATFP5	0.00205216	-0.00241068	0.0058259	0.0111197	-0.000234967	-0.00043566	0.00771418	0.0057798	-0.00424121	0.00792444	0.0197658	-0.00619514	-0.00971686	0.00788821	0.0193069	0.0225316	-0.00286517	-0.00908912	0.00121909	0.01

## Sheet: bray_curtis
pc vector number	1	2	3	4	5	6	7	8	9	10	11	12	13	14	15	16	17	18	19	20
Normal1	-0.368564	0.0386219	0.0857176	-0.0241269	0.0525099	0.0744033	0.0633318	0.135739	-0.0277382	0.0202409	-0.040995	-0.0709128	0.183979	-0.0406957	0.0250746	0.109392	0.0606856	-0.0136674	0.00257925	6.32713e-09
Normal2	-0.311638	-0.000454599	-0.0186386	-0.0692224	-0.127415	0.0570889	0.182889	0.0018709	-0.117306	-0.0773104	-0.0824551	-0.00469891	-0.145761	0.0540462	-0.0512231	0.00185215	-0.0188188	-0.0928894	-0.00304067	6.32713e-09
Normal3	-0.0628477	0.143684	0.106201	0.173298	0.125456	0.151888	0.0883691	0.15238	0.0100006	0.075967	0.0578602	0.0455124	-0.0179457	0.0767462	-0.000241488	-0.115373	-0.0772439	0.0659737	-0.000820034	6.32713e-09
Normal4	-0.428632	-0.0631636	0.0706822	-0.0507478	-0.0105403	-0.112397	-0.169414	-0.0572752	-0.0109299	0.00184935	-0.0233681	0.018969	0.0355554	-0.043432	0.0743729	-0.167096	0.000507448	-0.0439251	0.00265318	6.32713e-09
Normal5	-0.399933	0.0198558	0.0186488	0.0245042	0.0731996	-0.0517011	-0.105435	-0.0898175	0.139544	0.00711075	0.0756205	0.0244535	-0.115885	0.060124	-0.0167152	0.12835	-0.00919129	0.0759726	-0.00110264	6.32713e-09
DSS1	0.111229	-0.284423	0.0789486	-0.187791	-0.0610856	0.0841568	0.0249565	-0.0342443	0.0807057	0.224587	0.100185	0.0589881	0.0180782	0.0276021	-0.060134	-0.00218697	0.0320753	-0.070582	0.00418714	6.32713e-09
DSS2	0.0716168	-0.210272	0.0166029	0.0279491	0.213374	0.12521	0.000521611	-0.186127	-0.0635071	-0.0533237	-0.0859359	0.0102933	0.0291319	-0.10964	-0.0760823	0.0115083	-0.0884616	0.00826495	-0.000636693	6.32713e-09
DSS3	0.175555	-0.169569	0.143805	0.146803	0.0094378	-0.0427815	-0.0392727	-0.010282	0.0538264	-0.100678	0.0196922	-0.122618	0.0408516	0.126876	-0.0120612	-0.0103777	0.0185616	-0.052367	-0.0463128	6.32713e-09
DSS4	0.146506	-0.234081	0.0479408	0.122256	-0.0264554	-0.021827	-0.0621823	0.0720986	-0.0358214	-0.0837588	0.0326683	-0.077932	-0.0247803	0.0482208	0.0126216	0.0126275	-0.000874139	-0.00418	0.0640535	6.32713e-09
DSS5	0.0402412	-0.297459	-0.13221	-0.035733	-0.115912	0.0552742	-0.0838366	0.154987	-0.115084	-0.0288673	0.0325398	0.0463641	-0.052441	-0.0847367	0.042453	0.0155001	0.0163514	0.104753	-0.0277579	6.32713e-09
LATFP1	0.0335052	0.0965075	0.170097	0.094129	-0.194255	-0.12411	0.0658569	0.00797486	0.105384	-0.0265823	-0.0353981	0.010494	0.0365355	-0.107773	-0.162703	-0.0304545	0.00446056	0.0706448	0.00292579	6.32713e-09
LATFP2	0.103272	0.252698	-0.08512	-0.233482	0.00279278	0.098758	-0.101434	-0.00634579	-0.0253236	-0.185707	0.112907	0.0845668	0.0737607	0.0590867	-0.0744783	-0.0179874	0.0292473	-0.0048329	0.00451683	6.32713e-09
LATFP3	0.250786	0.205753	0.273044	-0.0688771	-0.106122	0.139716	-0.0938307	-0.020306	0.074836	0.00449074	-0.128433	0.0140408	-0.0525097	-0.0311288	0.131335	0.0449137	-0.0321763	-0.0152411	0.00014383	6.32713e-09
LATFP4	0.151553	0.0932666	0.00149301	-0.0940226	0.190699	-0.117148	0.0758883	0.116415	0.0744521	-0.0373367	0.0984967	-0.0451265	-0.106604	-0.147339	0.0255767	-0.00669787	0.0303165	-0.0749303	-0.00387232	6.32713e-09
LATFP5	0.141522	0.188207	0.0898114	-0.135801	0.0248695	-0.167295	-0.0406178	-0.0358952	-0.238794	0.138685	0.0155137	-0.0960459	-0.00348548	0.043791	-0.0262352	0.0249956	-0.0459408	0.0468041	-0.00313931	6.32713e-09
HATFP1	0.0739495	0.175066	-0.207511	0.23103	0.0284664	0.0859183	-0.105205	-0.0449281	-0.0416548	0.0989994	-0.0764118	-0.0181414	-0.052713	-0.0144449	-0.0505708	-0.0199347	0.16043	-0.0255708	0.000788303	6.32713e-09
HATFP2	0.10236	0.0264746	-0.119487	0.183332	-0.00290317	-0.161831	-0.0146102	0.0584979	-0.0291612	0.0196954	-0.0341211	0.204161	0.0600149	0.0227316	0.02253	0.0730769	-0.0730769	-0.0881289	-0.00266005	6.32713e-09
HATFP3	0.0520932	0.00519179	-0.384242	-0.151427	-0.0119643	-0.0214573	-0.00468861	0.0583099	0.161046	0.0383518	-0.132322	-0.10552	0.0294093	0.0433468	-0.00471944	-0.0255279	-0.0834302	0.0219149	0.00216512	6.32713e-09
HATFP4	0.120846	-0.0873929	0.0163579	-0.0883811	0.0780071	-0.100078	0.195787	-0.0954237	0.0120313	-0.0383162	-0.0846088	0.0868725	0.0164376	0.0719257	0.0930627	-0.0286101	0.114263	0.0912369	0.00515693	6.32713e-09
HATFP5	-0.00342063	0.101489	-0.172141	0.13631	-0.142158	0.0482123	0.122927	-0.177629	-0.00650637	0.00190249	0.178565	-0.0637197	0.0483707	-0.0553063	0.108137	0.00203029	-0.0376842	0.000749626	0.000172561	6.32713e-09

## Sheet: binary_jaccard.Draw.NMDS
#Sample	Design	Axis1	Axis2
Normal1	Normal	-1.24684	-0.534681
Normal2	Normal	-1.17721	-0.265055
Normal3	Normal	-1.21698	0.811773
Normal4	Normal	-2.03725	-0.119013
Normal5	Normal	-1.59392	0.239626
DSS1	DSS	1.18599	0.542249
DSS2	DSS	0.394271	0.720073
DSS3	DSS	0.945911	0.933481
DSS4	DSS	0.340835	0.451937
DSS5	DSS	0.584652	1.16618
LATFP1	LATFP	-0.312318	0.203727
LATFP2	LATFP	0.652258	-0.602622
LATFP3	LATFP	1.60819	-0.868804
LATFP4	LATFP	0.427033	-0.258195
LATFP5	LATFP	0.11426	-1.11962
HATFP1	HATFP	-0.025051	-0.569153
HATFP2	HATFP	0.138942	0.0398722
HATFP3	HATFP	0.514008	-0.615119
HATFP4	HATFP	0.727275	-0.149656
HATFP5	HATFP	-0.0240427	-0.0070008

## Sheet: weighted_unifrac.permano
diffs	Df	SumsOfSqs	MeanSqs	F.Model	R2	Pvalue	Psignf
treat1	3	0.379569	0.126523	3.37125	0.387296	0.002	*

## Sheet: binary_jaccard.anosim.Di
diffs	R	Pvalue	Psignf
treat1	0.752	0.001	*

## Sheet: _new_otu_tab
OTU_id	DSS	HATFP	LATFP	Normal	taxonomy
ASV1	20841	10864	15367	13447	k__Bacteria; p__Bacteroidota; c__Bacteroidia; o__Bacteroidales; f__Bacteroidaceae; g__Bacteroides; s__unclassified_Bacteroides
ASV2	1223	3515	1971	20046	k__Bacteria; p__Bacteroidota; c__Bacteroidia; o__Bacteroidales; f__Prevotellaceae; g__Alloprevotella; s__uncultured_Bacteroidales_bacterium
ASV3	8800	7591	11379	7707	k__Bacteria; p__Bacteroidota; c__Bacteroidia; o__Bacteroidales; f__Bacteroidaceae; g__Bacteroides; s__unclassified_Bacteroides
ASV4	499	2019	1372	12225	k__Bacteria; p__Bacteroidota; c__Bacteroidia; o__Bacteroidales; f__Prevotellaceae; g__Alloprevotella; s__uncultured_Bacteroidales_bacterium
ASV5	4104	6585	6293	3969	k__Bacteria; p__Desulfobacterota; c__Desulfovibrionia; o__Desulfovibrionales; f__Desulfovibrionaceae; g__unclassified_Desulfovibrionaceae; s__unclassified_Desulfovibrionaceae
ASV6	3131	5462	4918	2905	k__Bacteria; p__Verrucomicrobiota; c__Verrucomicrobiae; o__Verrucomicrobiales; f__Akkermansiaceae; g__Akkermansia; s__unclassified_Akkermansia
ASV7	6429	9133	19212	3785	k__Bacteria; p__Firmicutes; c__Bacilli; o__Erysipelotrichales; f__Erysipelotrichaceae; g__Allobaculum; s__unclassified_Allobaculum
ASV8	7959	7911	8544	1890	k__Bacteria; p__Firmicutes; c__Bacilli; o__Erysipelotrichales; f__Erysipelotrichaceae; g__Allobaculum; s__uncultured_Allobaculum_sp.
ASV9	756	6214	5673	3043	k__Bacteria; p__Verrucomicrobiota; c__Verrucomicrobiae; o__Verrucomicrobiales; f__Akkermansiaceae; g__Akkermansia; s__unclassified_Akkermansia
ASV10	1965	2719	478	3088	k__Bacteria; p__Bacteroidota; c__Bacteroidia; o__Bacteroidales; f__Muribaculaceae; g__uncultured_Bacteroidales_bacterium; s__uncultured_Bacteroidales_bacterium
ASV11	6161	2925	2679	2767	k__Bacteria; p__Bacteroidota; c__Bacteroidia; o__Bacteroidales; f__Muribaculaceae; g__unclassified_Muribaculaceae; s__unclassified_Muribaculaceae
ASV12	728	465	1020	2171	k__Bacteria; p__Firmicutes; c__Bacilli; o__Lactobacillales; f__Lactobacillaceae; g__Ligilactobacillus; s__unclassified_Ligilactobacillus
ASV13	1211	949	1096	2114	k__Bacteria; p__Campylobacterota; c__Campylobacteria; o__Campylobacterales; f__Helicobacteraceae; g__Helicobacter; s__unclassified_Helicobacter
ASV14	3122	2551	3974	3038	k__Bacteria; p__Bacteroidota; c__Bacteroidia; o__Bacteroidales; f__Muribaculaceae; g__unclassified_Muribaculaceae; s__unclassified_Muribaculaceae
ASV15	3812	3807	2799	2754	k__Bacteria; p__Bacteroidota; c__Bacteroidia; o__Bacteroidales; f__Muribaculaceae; g__unclassified_Muribaculaceae; s__unclassified_Muribaculaceae
ASV16	8702	1361	4962	0	k__Bacteria; p__Firmicutes; c__Negativicutes; o__Acidaminococcales; f__Acidaminococcaceae; g__Phascolarctobacterium; s__unclassified_Phascolarctobacterium
ASV17	7752	5801	2848	1152	k__Bacteria; p__Bacteroidota; c__Bacteroidia; o__Bacteroidales; f__Bacteroidaceae; g__Bacteroides; s__unclassified_Bacteroides
ASV18	0	0	0	6708	k__Bacteria; p__Firmicutes; c__Clostridia; o__Oscillospirales; f__[Eubacterium]_coprostanoligenes_group; g__unclassified_[Eubacterium]_coprostanoligenes_group; s__unclassified_[Eubacterium]_coprostanoligenes_group
ASV19	8576	3635	1139	2894	k__Bacteria; p__Bacteroidota; c__Bacteroidia; o__Bacteroidales; f__Prevotellaceae; g__Prevotellaceae_UCG_001; s__unclassified_Prevotellaceae_UCG_001
ASV20	6577	5560	6701	1580	k__Bacteria; p__Firmicutes; c__Bacilli; o__Erysipelotrichales; f__Erysipelotrichaceae; g__Allobaculum; s__uncultured_Allobaculum_sp.
ASV21	2011	1368	1745	1398	k__Bacteria; p__Campylobacterota; c__Campylobacteria; o__Campylobacterales; f__Helicobacteraceae; g__Helicobacter; s__unclassified_Helicobacter
ASV22	788	1177	1179	1973	k__Bacteria; p__Bacteroidota; c__Bacteroidia; o__Bacteroidales; f__Muribaculaceae; g__unclassified_Muribaculaceae; s__unclassified_Muribaculaceae
ASV23	2539	2412	2073	2376	k__Bacteria; p__Bacteroidota; c__Bacteroidia; o__Bacteroidales; f__Muribaculaceae; g__unclassified_Muribaculaceae; s__unclassified_Muribaculaceae
ASV24	7269	3064	94	3753	k__Bacteria; p__Actinobacteriota; c__Actinobacteria; o__Corynebacteriales; f__Corynebacteriaceae; g__Corynebacterium; s__Corynebacterium_stationis
ASV25	0	107	0	3751	k__Bacteria; p__Bacteroidota; c__Bacteroidia; o__Bacteroidales; f__Muribaculaceae; g__uncultured_Bacteroidales_bacterium; s__uncultured_Bacteroidales_bacterium
ASV26	1452	1849	1435	3351	k__Bacteria; p__Firmicutes; c__Bacilli; o__Lactobacillales; f__Lactobacillaceae; g__Lactobacillus; s__unclassified_Lactobacillus
ASV27	3694	2922	2055	2724	k__Bacteria; p__Bacteroidota; c__Bacteroidia; o__Bacteroidales; f__Rikenellaceae; g__Rikenellaceae_RC9_gut_group; s__unclassified_Rikenellaceae_RC9_gut_group
ASV28	2756	2491	2046	1806	k__Bacteria; p__Bacteroidota; c__Bacteroidia; o__Bacteroidales; f__Muribaculaceae; g__uncultured_Bacteroidales_bacterium; s__uncultured_Bacteroidales_bacterium
ASV29	5197	1488	977	1291	k__Bacteria; p__Bacteroidota; c__Bacteroidia; o__Bacteroidales; f__Bacteroidaceae; g__Bacteroides; s__Phocaeicola_sartorii
ASV30	4803	3874	1473	1807	k__Bacteria; p__Bacteroidota; c__Bacteroidia; o__Bacteroidales; f__Muribaculaceae; g__unclassified_Muribaculaceae; s__unclassified_Muribaculaceae
ASV31	4856	1737	1172	2913	k__Bacteria; p__Bacteroidota; c__Bacteroidia; o__Bacteroidales; f__Muribaculaceae; g__unclassified_Muribaculaceae; s__unclassified_Muribaculaceae
ASV32	0	0	7	3285	k__Bacteria; p__Bacteroidota; c__Bacteroidia; o__Bacteroidales; f__Muribaculaceae; g__uncultured_Bacteroidales_bacterium; s__uncultured_Bacteroidales_bacterium
ASV33	1729	1158	963	1591	k__Bacteria; p__Firmicutes; c__Clostridia; o__Oscillospirales; f__Oscillospiraceae; g__unclassified_Oscillospiraceae; s__unclassified_Oscillospiraceae
ASV34	0	1376	1452	1933	k__Bacteria; p__Bacteroidota; c__Bacteroidia; o__Bacteroidales; f__Muribaculaceae; g__unclassified_Muribaculaceae; s__unclassified_Muribaculaceae
ASV35	0	0	7	1556	k__Bacteria; p__Bacteroidota; c__Bacteroidia; o__Bacteroidales; f__Bacteroidaceae; g__Bacteroides; s__unclassified_Bacteroides
ASV36	1046	975	1319	1311	k__Bacteria; p__Bacteroidota; c__Bacteroidia; o__Bacteroidales; f__Muribaculaceae; g__unclassified_Muribaculaceae; s__unclassified_Muribaculaceae
ASV37	0	768	1069	2283	k__Bacteria; p__Bacteroidota; c__Bacteroidia; o__Bacteroidales; f__Muribaculaceae; g__unclassified_Muribaculaceae; s__unclassified_Muribaculaceae
ASV38	152	354	1130	1777	k__Bacteria; p__Bacteroidota; c__Bacteroidia; o__Bacteroidales; f__Tannerellaceae; g__Parabacteroides; s__uncultured_Bacteroidales_bacterium
ASV39	1072	0	295	3511	k__Bacteria; p__Bacteroidota; c__Bacteroidia; o__Bacteroidales; f__Tannerellaceae; g__Parabacteroides; s__unclassified_Parabacteroides
ASV40	53	2502	302	1901	k__Bacteria; p__Firmicutes; c__Clostridia; o__Lachnospirales; f__Lachnospiraceae; g__unclassified_Lachnospiraceae; s__unclassified_Lachnospiraceae
ASV41	1593	4338	7367	2559	k__Bacteria; p__Firmicutes; c__Bacilli; o__Erysipelotrichales; f__Erysipelotrichaceae; g__Dubosiella; s__unclassified_Dubosiella
ASV42	737	781	4336	383	k__Bacteria; p__Actinobacteriota; c__Coriobacteriia; o__Coriobacteriales; f__Atopobiaceae; g__unclassified_Atopobiaceae; s__unclassified_Atopobiaceae
ASV43	365	532	785	1512	k__Bacteria; p__Proteobacteria; c__Gammaproteobacteria; o__Burkholderiales; f__Sutterellaceae; g__Parasutterella; s__unclassified_Parasutterella
ASV44	0	4869	5553	0	k__Bacteria; p__Firmicutes; c__Clostridia; o__Oscillospirales; f__Ruminococcaceae; g__Ruminococcus; s__unclassified_Ruminococcus
ASV45	4555	1812	0	5819	k__Bacteria; p__Firmicutes; c__Bacilli; o__Staphylococcales; f__Staphylococcaceae; g__Staphylococcus; s__unclassified_Staphylococcus
ASV46	271	596	1187	2198	k__Bacteria; p__Bacteroidota; c__Bacteroidia; o__Bacteroidales; f__Muribaculaceae; g__unclassified_Muribaculaceae; s__unclassified_Muribaculaceae
ASV47	0	0	0	3212	k__Bacteria; p__Bacteroidota; c__Bacteroidia; o__Bacteroidales; f__Muribaculaceae; g__uncultured_Bacteroidales_bacterium; s__uncultured_Bacteroidales_bacterium
ASV48	3357	3787	3919	0	k__Bacteria; p__Firmicutes; c__Clostridia; o__Oscillospirales; f__[Eubacterium]_coprostanoligenes_group; g__unclassified_[Eubacterium]_coprostanoligenes_group; s__unclassified_[Eubacterium]_coprostanoligenes_group
ASV49	1623	0	1296	0	k__Bacteria; p__Firmicutes; c__Clostridia; o__Oscillospirales; f__Ruminococcaceae; g__Ruminococcus; s__unclassified_Ruminococcus
ASV50	8776	1186	420	2201	k__Bacteria; p__Firmicutes; c__Clostridia; o__Lachnospirales; f__Lachnospiraceae; g__unclassified_Lachnospiraceae; s__unclassified_Lachnospiraceae
ASV51	705	304	510	908	k__Bacteria; p__Firmicutes; c__Clostridia; o__Lachnospirales; f__Lachnospiraceae; g__unclassified_Lachnospiraceae; s__unclassified_Lachnospiraceae
ASV52	1160	463	2506	1989	k__Bacteria; p__Bacteroidota; c__Bacteroidia; o__Bacteroidales; f__Muribaculaceae; g__Muribaculum; s__unclassified_Muribaculum
ASV53	4110	1660	861	513	k__Bacteria; p__Bacteroidota; c__Bacteroidia; o__Bacteroidales; f__Bacteroidaceae; g__Bacteroides; s__Phocaeicola_sartorii
ASV54	758	2273	1155	1100	k__Bacteria; p__Desulfobacterota; c__Desulfovibrionia; o__Desulfovibrionales; f__Desulfovibrionaceae; g__Desulfovibrio; s__unclassified_Desulfovibrio
ASV55	1177	1712	1203	1255	k__Bacteria; p__Bacteroidota; c__Bacteroidia; o__Bacteroidales; f__Muribaculaceae; g__unclassified_Muribaculaceae; s__unclassified_Muribaculaceae
ASV56	1155	2430	79	1410	k__Bacteria; p__Firmicutes; c__Clostridia; o__Lachnospirales; f__Lachnospiraceae; g__unclassified_Lachnospiraceae; s__unclassified_Lachnospiraceae
ASV57	2825	668	1197	1427	k__Bacteria; p__Bacteroidota; c__Bacteroidia; o__Bacteroidales; f__Prevotellaceae; g__Paraprevotella; s__unclassified_Paraprevotella
ASV58	0	126	40	2199	k__Bacteria; p__Bacteroidota; c__Bacteroidia; o__Bacteroidales; f__Muribaculaceae; g__uncultured_Bacteroidales_bacterium; s__uncultured_Bacteroidales_bacterium
ASV59	716	4599	4025	1560	k__Bacteria; p__Firmicutes; c__Bacilli; o__Erysipelotrichales; f__Erysipelotrichaceae; g__Faecalibaculum; s__unclassified_Faecalibaculum
ASV60	1057	256	763	1990	k__Bacteria; p__Firmicutes; c__Bacilli; o__unclassified_Bacilli; f__unclassified_Bacilli; g__unclassified_Bacilli; s__unclassified_Bacilli
ASV61	1071	726	749	882	k__Bacteria; p__Bacteroidota; c__Bacteroidia; o__Bacteroidales; f__Muribaculaceae; g__unclassified_Muribaculaceae; s__unclassified_Muribaculaceae
ASV62	409	1814	450	930	k__Bacteria; p__Firmicutes; c__Clostridia; o__Oscillospirales; f__Ruminococcaceae; g__Anaerotruncus; s__unclassified_Anaerotruncus
ASV63	3455	76	562	1155	k__Bacteria; p__Bacteroidota; c__Bacteroidia; o__Bacteroidales; f__Rikenellaceae; g__Alistipes; s__unclassified_Alistipes
ASV64	0	0	5	2726	k__Bacteria; p__Bacteroidota; c__Bacteroidia; o__Bacteroidales; f__Muribaculaceae; g__unclassified_Muribaculaceae; s__unclassified_Muribaculaceae
ASV65	135	1268	892	1105	k__Bacteria; p__Bacteroidota; c__Bacteroidia; o__Bacteroidales; f__Muribaculaceae; g__unclassified_Muribaculaceae; s__unclassified_Muribaculaceae
ASV66	1521	1487	1034	2615	k__Bacteria; p__Patescibacteria; c__Saccharimonadia; o__Saccharimonadales; f__Saccharimonadaceae; g__Candidatus_Saccharimonas; s__unclassified_Candidatus_Saccharimonas
ASV67	24	292	2485	56	k__Bacteria; p__Campylobacterota; c__Campylobacteria; o__Campylobacterales; f__Helicobacteraceae; g__Helicobacter; s__unclassified_Helicobacter
ASV68	429	297	900	283	k__Bacteria; p__Proteobacteria; c__Gammaproteobacteria; o__Burkholderiales; f__Sutterellaceae; g__Parasutterella; s__Burkholderiales_bacterium_YL45
ASV69	356	203	5006	157	k__Bacteria; p__Bacteroidota; c__Bacteroidia; o__Bacteroidales; f__Bacteroidaceae; g__Bacteroides; s__unclassified_Bacteroides
ASV70	455	519	626	687	k__Bacteria; p__Firmicutes; c__Clostridia; o__Lachnospirales; f__Lachnospiraceae; g__unclassified_Lachnospiraceae; s__unclassified_Lachnospiraceae
ASV71	2015	1215	3596	211	k__Bacteria; p__Proteobacteria; c__Gammaproteobacteria; o__Burkholderiales; f__Sutterellaceae; g__Parasutterella; s__Burkholderiales_bacterium_YL45
ASV72	350	649	635	1012	k__Bacteria; p__Firmicutes; c__Clostridia; o__Oscillospirales; f__[Eubacterium]_coprostanoligenes_group; g__unclassified_[Eubacterium]_coprostanoligenes_group; s__unclassified_[Eubacterium]_coprostanoligenes_group
ASV73	0	185	16	1811	k__Bacteria; p__Bacteroidota; c__Bacteroidia; o__Bacteroidales; f__Muribaculaceae; g__uncultured_Bacteroidales_bacterium; s__uncultured_Bacteroidales_bacterium
ASV74	1826	1615	6464	448	k__Bacteria; p__Firmicutes; c__Bacilli; o__Erysipelotrichales; f__Erysipelotrichaceae; g__Dubosiella; s__unclassified_Dubosiella
ASV75	650	638	550	916	k__Bacteria; p__Bacteroidota; c__Bacteroidia; o__Bacteroidales; f__Muribaculaceae; g__unclassified_Muribaculaceae; s__unclassified_Muribaculaceae
ASV76	2	683	434	864	k__Bacteria; p__Bacteroidota; c__Bacteroidia; o__Bacteroidales; f__Prevotellaceae; g__Prevotellaceae_UCG_001; s__unclassified_Prevotellaceae_UCG_001
ASV77	0	38	1266	20	k__Bacteria; p__Proteobacteria; c__Gammaproteobacteria; o__Enterobacterales; f__Enterobacteriaceae; g__Escherichia_Shigella; s__unclassified_Escherichia_Shigella
ASV78	0	0	0	894	k__Bacteria; p__Firmicutes; c__Clostridia; o__Lachnospirales; f__Lachnospiraceae; g__Lachnospiraceae_NK4A136_group; s__unclassified_Lachnospiraceae_NK4A136_group
ASV79	1722	1043	2932	207	k__Bacteria; p__Proteobacteria; c__Gammaproteobacteria; o__Burkholderiales; f__Sutterellaceae; g__Parasutterella; s__Burkholderiales_bacterium_YL45
ASV80	152	68	1014	449	k__Bacteria; p__Firmicutes; c__Bacilli; o__Erysipelotrichales; f__Erysipelatoclostridiaceae; g__Erysipelatoclostridium; s__unclassified_Erysipelatoclostridium
ASV81	31	1484	3558	53	k__Bacteria; p__Firmicutes; c__Clostridia; o__Lachnospirales; f__Lachnospiraceae; g__Lachnospiraceae_NK4A136_group; s__uncultured_Clostridiales_bacterium
ASV82	1480	1580	734	319	k__Bacteria; p__Bacteroidota; c__Bacteroidia; o__Bacteroidales; f__Bacteroidaceae; g__Bacteroides; s__unclassified_Bacteroides
ASV83	1317	1338	496	506	k__Bacteria; p__Bacteroidota; c__Bacteroidia; o__Bacteroidales; f__Muribaculaceae; g__unclassified_Muribaculaceae; s__unclassified_Muribaculaceae
ASV84	119	440	1972	671	k__Bacteria; p__Firmicutes; c__Clostridia; o__Lachnospirales; f__Lachnospiraceae; g__Lachnospiraceae_NK4A136_group; s__unclassified_Lachnospiraceae_NK4A136_group
ASV85	6244	1010	848	1123	k__Bacteria; p__Firmicutes; c__Clostridia; o__Oscillospirales; f__[Eubacterium]_coprostanoligenes_group; g__unclassified_[Eubacterium]_coprostanoligenes_group; s__unclassified_[Eubacterium]_coprostanoligenes_group
ASV86	2531	4521	400	486	k__Bacteria; p__Firmicutes; c__Clostridia; o__Lachnospirales; f__Lachnospiraceae; g__Anaerostipes; s__unclassified_Anaerostipes
ASV87	587	738	462	3460	k__Bacteria; p__Bacteroidota; c__Bacteroidia; o__Bacteroidales; f__Marinifilaceae; g__Odoribacter; s__unclassified_Odoribacter
ASV88	3057	7308	170	0	k__Bacteria; p__Firmicutes; c__Clostridia; o__Lachnospirales; f__Lachnospiraceae; g__Lachnospiraceae_NK4A136_group; s__unclassified_Lachnospiraceae_NK4A136_group
ASV89	92	1385	903	571	k__Bacteria; p__Firmicutes; c__Clostridia; o__Oscillospirales; f__UCG_010; g__unclassified_UCG_010; s__unclassified_UCG_010
ASV90	0	0	0	919	k__Bacteria; p__Bacteroidota; c__Bacteroidia; o__Bacteroidales; f__Bacteroidaceae; g__Bacteroides; s__unclassified_Bacteroides
ASV91	265	546	42	1856	k__Bacteria; p__Bacteroidota; c__Bacteroidia; o__Bacteroidales; f__Rikenellaceae; g__Alistipes; s__unclassified_Alistipes
ASV92	793	1334	581	299	k__Bacteria; p__Bacteroidota; c__Bacteroidia; o__Bacteroidales; f__Muribaculaceae; g__unclassified_Muribaculaceae; s__unclassified_Muribaculaceae
ASV93	36	1491	2277	1281	k__Bacteria; p__Firmicutes; c__Clostridia; o__Lachnospirales; f__Lachnospiraceae; g__unclassified_Lachnospiraceae; s__unclassified_Lachnospiraceae
ASV94	2402	1273	261	746	k__Bacteria; p__Bacteroidota; c__Bacteroidia; o__Bacteroidales; f__Muribaculaceae; g__unclassified_Muribaculaceae; s__unclassified_Muribaculaceae
ASV95	76	320	37	1486	k__Bacteria; p__Firmicutes; c__Clostridia; o__Lachnospirales; f__Lachnospiraceae; g__Lachnospiraceae_NK4A136_group; s__Clostridiales_bacterium_CIEAF_020
ASV96	386	1330	670	307	k__Bacteria; p__Firmicutes; c__Clostridia; o__Oscillospirales; f__Oscillospiraceae; g__Oscillibacter; s__unclassified_Oscillibacter
ASV97	213	386	568	0	k__Bacteria; p__Firmicutes; c__Clostridia; o__Lachnospirales; f__Lachnospiraceae; g__unclassified_Lachnospiraceae; s__unclassified_Lachnospiraceae
ASV98	90	64	52	46	k__Bacteria; p__Firmicutes; c__Clostridia; o__Lachnospirales; f__Lachnospiraceae; g__Lachnospiraceae_NK4A136_group; s__unclassified_Lachnospiraceae_NK4A136_group
ASV99	258	84	236	842	k__Bacteria; p__Firmicutes; c__Clostridia; o__Clostridiales; f__Clostridiaceae; g__Candidatus_Arthromitus; s__unclassified_Candidatus_Arthromitus
ASV100	303	0	0	685	k__Bacteria; p__Firmicutes; c__Clostridia; o__Oscillospirales; f__Ruminococcaceae; g__Ruminococcus; s__unclassified_Ruminococcus
ASV101	547	323	2230	0	k__Bacteria; p__Firmicutes; c__Clostridia; o__Lachnospirales; f__Lachnospiraceae; g__unclassified_Lachnospiraceae; s__unclassified_Lachnospiraceae
ASV102	1863	1657	465	516	k__Bacteria; p__Bacteroidota; c__Bacteroidia; o__Bacteroidales; f__Muribaculaceae; g__unclassified_Muribaculaceae; s__unclassified_Muribaculaceae
ASV104	1210	944	465	702	k__Bacteria; p__Bacteroidota; c__Bacteroidia; o__Bacteroidales; f__Muribaculaceae; g__uncultured_Bacteroidales_bacterium; s__uncultured_Bacteroidales_bacterium
ASV105	263	930	262	310	k__Bacteria; p__Firmicutes; c__Clostridia; o__Oscillospirales; f__Oscillospiraceae; g__unclassified_Oscillospiraceae; s__unclassified_Oscillospiraceae
ASV106	344	493	299	1976	k__Bacteria; p__Firmicutes; c__Clostridia; o__Lachnospirales; f__Lachnospiraceae; g__Lachnospiraceae_NK4A136_group; s__unclassified_Lachnospiraceae_NK4A136_group
ASV107	1107	1362	1017	1242	k__Bacteria; p__Bacteroidota; c__Bacteroidia; o__Bacteroidales; f__Muribaculaceae; g__uncultured_Barnesiella_sp.; s__uncultured_Barnesiella_sp.
ASV108	1899	2125	708	252	k__Bacteria; p__Bacteroidota; c__Bacteroidia; o__Bacteroidales; f__Muribaculaceae; g__unclassified_Muribaculaceae; s__unclassified_Muribaculaceae
ASV109	165	170	689	1099	k__Bacteria; p__Firmicutes; c__Bacilli; o__Erysipelotrichales; f__Erysipelatoclostridiaceae; g__Erysipelatoclostridium; s__unclassified_Erysipelatoclostridium
ASV110	127	951	219	703	k__Bacteria; p__Bacteroidota; c__Bacteroidia; o__Bacteroidales; f__Muribaculaceae; g__uncultured_Muribaculaceae_bacterium; s__uncultured_Muribaculaceae_bacterium
ASV111	477	727	1000	854	k__Bacteria; p__Bacteroidota; c__Bacteroidia; o__Bacteroidales; f__Muribaculaceae; g__unclassified_Muribaculaceae; s__unclassified_Muribaculaceae
ASV112	0	1544	951	243	k__Bacteria; p__Firmicutes; c__Clostridia; o__Lachnospirales; f__Lachnospiraceae; g__Blautia; s__unclassified_Blautia
ASV113	253	0	0	1324	k__Bacteria; p__Bacteroidota; c__Bacteroidia; o__Bacteroidales; f__Muribaculaceae; g__unclassified_Muribaculaceae; s__unclassified_Muribaculaceae
ASV114	94	308	0	1284	k__Bacteria; p__Bacteroidota; c__Bacteroidia; o__Bacteroidales; f__Rikenellaceae; g__Rikenella; s__unclassified_Rikenella
ASV115	1047	2146	835	144	k__Bacteria; p__Firmicutes; c__Clostridia; o__Lachnospirales; f__Lachnospiraceae; g__Blautia; s__Lachnospiraceae_bacterium_DW59
ASV116	0	62	296	0	k__Bacteria; p__Bacteroidota; c__Bacteroidia; o__Bacteroidales; f__Tannerellaceae; g__Parabacteroides; s__uncultured_Bacteroidales_bacterium
ASV117	701	1001	678	448	k__Bacteria; p__Bacteroidota; c__Bacteroidia; o__Bacteroidales; f__Muribaculaceae; g__unclassified_Muribaculaceae; s__unclassified_Muribaculaceae
ASV118	1522	802	589	163	k__Bacteria; p__Bacteroidota; c__Bacteroidia; o__Bacteroidales; f__Muribaculaceae; g__unclassified_Muribaculaceae; s__unclassified_Muribaculaceae
ASV119	363	430	594	600	k__Bacteria; p__Firmicutes; c__Clostridia; o__Oscillospirales; f__UCG_010; g__unclassified_UCG_010; s__unclassified_UCG_010
ASV120	0	157	121	943	k__Bacteria; p__Bacteroidota; c__Bacteroidia; o__Bacteroidales; f__Bacteroidaceae; g__Bacteroides; s__Bacteroides_caecimuris
ASV121	1885	1248	1058	774	k__Bacteria; p__Bacteroidota; c__Bacteroidia; o__Bacteroidales; f__Rikenellaceae; g__Alistipes; s__unclassified_Alistipes
ASV123	1125	690	14	793	k__Bacteria; p__Bacteroidota; c__Bacteroidia; o__Bacteroidales; f__Muribaculaceae; g__uncultured_Bacteroidales_bacterium; s__uncultured_Bacteroidales_bacterium
ASV124	2281	6168	188	0	k__Bacteria; p__Firmicutes; c__Clostridia; o__Lachnospirales; f__Lachnospiraceae; g__Lachnospiraceae_NK4A136_group; s__unclassified_Lachnospiraceae_NK4A136_group
ASV125	567	325	700	919	k__Bacteria; p__Bacteroidota; c__Bacteroidia; o__Bacteroidales; f__Muribaculaceae; g__uncultured_Bacteroidales_bacterium; s__uncultured_Bacteroidales_bacterium
ASV127	596	0	0	0	k__Bacteria; p__Bacteroidota; c__Bacteroidia; o__Bacteroidales; f__Prevotellaceae; g__Paraprevotella; s__unclassified_Paraprevotella
ASV128	0	664	920	475	k__Bacteria; p__Bacteroidota; c__Bacteroidia; o__Bacteroidales; f__Muribaculaceae; g__unclassified_Muribaculaceae; s__unclassified_Muribaculaceae
ASV129	36	1141	0	163	k__Bacteria; p__Firmicutes; c__Bacilli; o__Erysipelotrichales; f__Erysipelotrichaceae; g__Dubosiella; s__unclassified_Dubosiella
ASV130	409	335	241	533	k__Bacteria; p__Deferribacterota; c__Deferribacteres; o__Deferribacterales; f__Deferribacteraceae; g__Mucispirillum; s__Mucispirillum_sp._69
ASV131	5478	0	0	306	k__Bacteria; p__Firmicutes; c__Clostridia; o__Lachnospirales; f__Lachnospiraceae; g__Lachnospiraceae_NK4A136_group; s__uncultured_Clostridiales_bacterium
ASV132	1461	1112	841	412	k__Bacteria; p__Bacteroidota; c__Bacteroidia; o__Bacteroidales; f__Muribaculaceae; g__unclassified_Muribaculaceae; s__unclassified_Muribaculaceae
ASV133	0	1107	3829	0	k__Bacteria; p__Firmicutes; c__Bacilli; o__Erysipelotrichales; f__Erysipelotrichaceae; g__Allobaculum; s__unclassified_Allobaculum
ASV134	462	256	659	811	k__Bacteria; p__Bacteroidota; c__Bacteroidia; o__Bacteroidales; f__Muribaculaceae; g__uncultured_Bacteroidales_bacterium; s__uncultured_Bacteroidales_bacterium
ASV135	0	173	288	268	k__Bacteria; p__Bacteroidota; c__Bacteroidia; o__Bacteroidales; f__Muribaculaceae; g__unclassified_Muribaculaceae; s__unclassified_Muribaculaceae
ASV136	65	11	3154	18	k__Bacteria; p__Bacteroidota; c__Bacteroidia; o__Bacteroidales; f__Bacteroidaceae; g__Bacteroides; s__Phocaeicola_vulgatus
ASV137	0	866	1601	0	k__Bacteria; p__Bacteroidota; c__Bacteroidia; o__Bacteroidales; f__Muribaculaceae; g__unclassified_Muribaculaceae; s__unclassified_Muribaculaceae
ASV138	0	0	0	2393	k__Bacteria; p__Bacteroidota; c__Bacteroidia; o__Bacteroidales; f__Muribaculaceae; g__unclassified_Muribaculaceae; s__unclassified_Muribaculaceae
ASV139	0	347	229	205	k__Bacteria; p__Bacteroidota; c__Bacteroidia; o__Bacteroidales; f__Prevotellaceae; g__Prevotellaceae_UCG_001; s__unclassified_Prevotellaceae_UCG_001
ASV140	137	354	467	341	k__Bacteria; p__Firmicutes; c__Clostridia; o__Oscillospirales; f__Oscillospiraceae; g__Colidextribacter; s__unclassified_Colidextribacter
ASV141	0	263	0	281	k__Bacteria; p__Firmicutes; c__Clostridia; o__Lachnospirales; f__Lachnospiraceae; g__Lachnospiraceae_NK4A136_group; s__unclassified_Lachnospiraceae_NK4A136_group
ASV142	1217	764	472	146	k__Bacteria; p__Bacteroidota; c__Bacteroidia; o__Bacteroidales; f__Bacteroidaceae; g__Bacteroides; s__Phocaeicola_sartorii
ASV143	139	0	295	99	k__Bacteria; p__Proteobacteria; c__Gammaproteobacteria; o__Burkholderiales; f__Sutterellaceae; g__Parasutterella; s__Burkholderiales_bacterium_YL45
ASV144	282	314	182	710	k__Bacteria; p__Deferribacterota; c__Deferribacteres; o__Deferribacterales; f__Deferribacteraceae; g__Mucispirillum; s__unclassified_Mucispirillum
ASV145	0	0	0	668	k__Bacteria; p__Bacteroidota; c__Bacteroidia; o__Bacteroidales; f__Rikenellaceae; g__Rikenella_sp._Marseille_P3215; s__unclassified_Rikenella_sp._Marseille_P3215
ASV146	0	3	76	955	k__Bacteria; p__Firmicutes; c__Clostridia; o__Oscillospirales; f__Oscillospiraceae; g__unclassified_Oscillospiraceae; s__unclassified_Oscillospiraceae
ASV147	2707	220	146	149	k__Bacteria; p__Bacteroidota; c__Bacteroidia; o__Bacteroidales; f__Bacteroidaceae; g__Bacteroides; s__Bacteroides_caecimuris
ASV148	5101	0	0	248	k__Bacteria; p__Firmicutes; c__Clostridia; o__Lachnospirales; f__Lachnospiraceae; g__Lachnospiraceae_NK4A136_group; s__unclassified_Lachnospiraceae_NK4A136_group
ASV149	356	0	177	42	k__Bacteria; p__Firmicutes; c__Bacilli; o__Erysipelotrichales; f__Erysipelotrichaceae; g__Dubosiella; s__Firmicutes_bacterium_M10_2
ASV150	135	826	986	38	k__Bacteria; p__Firmicutes; c__Clostridia; o__Lachnospirales; f__Lachnospiraceae; g__Lachnospiraceae_NK4A136_group; s__unclassified_Lachnospiraceae_NK4A136_group
ASV151	0	0	0	829	k__Bacteria; p__Firmicutes; c__Clostridia; o__Lachnospirales; f__Lachnospiraceae; g__unclassified_Lachnospiraceae; s__unclassified_Lachnospiraceae
ASV152	280	317	158	581	k__Bacteria; p__Bacteroidota; c__Bacteroidia; o__Bacteroidales; f__Marinifilaceae; g__Odoribacter; s__unclassified_Odoribacter
ASV153	646	1557	1660	1186	k__Bacteria; p__Desulfobacterota; c__Desulfovibrionia; o__Desulfovibrionales; f__Desulfovibrionaceae; g__unclassified_Desulfovibrionaceae; s__unclassified_Desulfovibrionaceae
ASV154	980	0	398	274	k__Bacteria; p__Bacteroidota; c__Bacteroidia; o__Bacteroidales; f__Muribaculaceae; g__unclassified_Muribaculaceae; s__unclassified_Muribaculaceae
ASV155	0	681	618	8	k__Bacteria; p__Bacteroidota; c__Bacteroidia; o__Bacteroidales; f__Bacteroidaceae; g__Bacteroides; s__unclassified_Bacteroides
ASV156	1080	0	325	266	k__Bacteria; p__Bacteroidota; c__Bacteroidia; o__Bacteroidales; f__Rikenellaceae; g__Alistipes; s__unclassified_Alistipes
ASV157	46	14	2234	0	k__Bacteria; p__Firmicutes; c__Clostridia; o__Lachnospirales; f__Lachnospiraceae; g__unclassified_Lachnospiraceae; s__unclassified_Lachnospiraceae
ASV158	1001	578	1536	0	k__Bacteria; p__Proteobacteria; c__Gammaproteobacteria; o__Burkholderiales; f__Sutterellaceae; g__Parasutterella; s__Burkholderiales_bacterium_YL45
ASV159	0	483	568	0	k__Bacteria; p__Bacteroidota; c__Bacteroidia; o__Bacteroidales; f__Muribaculaceae; g__unclassified_Muribaculaceae; s__unclassified_Muribaculaceae
ASV160	613	737	397	831	k__Bacteria; p__Firmicutes; c__Clostridia; o__Christensenellales; f__Christensenellaceae; g__Christensenellaceae_R_7_group; s__Christensenellaceae_R_7_group_bacterium_YE57
ASV161	8308	0	545	0	k__Bacteria; p__Firmicutes; c__Clostridia; o__Oscillospirales; f__Ruminococcaceae; g__Ruminococcus; s__unclassified_Ruminococcus
ASV163	217	0	1078	625	k__Bacteria; p__Bacteroidota; c__Bacteroidia; o__Bacteroidales; f__Muribaculaceae; g__uncultured_Bacteroidales_bacterium; s__uncultured_Bacteroidales_bacterium
ASV164	1076	285	833	0	k__Bacteria; p__Bacteroidota; c__Bacteroidia; o__Bacteroidales; f__Tannerellaceae; g__Parabacteroides; s__unclassified_Parabacteroides
ASV165	469	338	1416	123	k__Bacteria; p__Bacteroidota; c__Bacteroidia; o__Bacteroidales; f__Muribaculaceae; g__unclassified_Muribaculaceae; s__unclassified_Muribaculaceae
ASV166	0	0	0	759	k__Bacteria; p__Firmicutes; c__Clostridia; o__Oscillospirales; f__Oscillospiraceae; g__unclassified_Oscillospiraceae; s__uncultured_Clostridiales_bacterium
ASV167	0	103	0	93	k__Bacteria; p__Bacteroidota; c__Bacteroidia; o__Bacteroidales; f__Muribaculaceae; g__unclassified_Muribaculaceae; s__unclassified_Muribaculaceae
ASV168	742	464	1538	128	k__Bacteria; p__Proteobacteria; c__Gammaproteobacteria; o__Burkholderiales; f__Sutterellaceae; g__Parasutterella; s__Burkholderiales_bacterium_YL45
ASV169	17	664	148	486	k__Bacteria; p__Firmicutes; c__Clostridia; o__Lachnospirales; f__Lachnospiraceae; g__Lachnospiraceae_NK4A136_group; s__unclassified_Lachnospiraceae_NK4A136_group
ASV170	0	947	376	1014	k__Bacteria; p__Firmicutes; c__Clostridia; o__Lachnospirales; f__Lachnospiraceae; g__[Eubacterium]_xylanophilum_group; s__unclassified_[Eubacterium]_xylanophilum_group
ASV171	462	604	358	107	k__Bacteria; p__Bacteroidota; c__Bacteroidia; o__Bacteroidales; f__Muribaculaceae; g__uncultured_Bacteroidales_bacterium; s__uncultured_Bacteroidales_bacterium
ASV172	35	0	131	302	k__Bacteria; p__Bacteroidota; c__Bacteroidia; o__Bacteroidales; f__Muribaculaceae; g__uncultured_Bacteroidales_bacterium; s__uncultured_Bacteroidales_bacterium
ASV173	0	583	0	0	k__Bacteria; p__Bacteroidota; c__Bacteroidia; o__Bacteroidales; f__Bacteroidaceae; g__Bacteroides; s__unclassified_Bacteroides
ASV174	0	90	206	634	k__Bacteria; p__Firmicutes; c__Clostridia; o__Peptostreptococcales_Tissierellales; f__Anaerovoracaceae; g__[Eubacterium]_nodatum_group; s__unclassified_[Eubacterium]_nodatum_group
ASV175	284	41	134	606	k__Bacteria; p__Firmicutes; c__Clostridia; o__Lachnospirales; f__Lachnospiraceae; g__unclassified_Lachnospiraceae; s__unclassified_Lachnospiraceae
ASV176	711	49	332	78	k__Bacteria; p__Firmicutes; c__Clostridia; o__Oscillospirales; f__Oscillospiraceae; g__unclassified_Oscillospiraceae; s__unclassified_Oscillospiraceae
ASV177	0	0	0	3138	k__Bacteria; p__Firmicutes; c__Clostridia; o__Lachnospirales; f__Lachnospiraceae; g__Lachnospiraceae_NK4A136_group; s__unclassified_Lachnospiraceae_NK4A136_group
ASV178	1524	554	487	118	k__Bacteria; p__Bacteroidota; c__Bacteroidia; o__Bacteroidales; f__Tannerellaceae; g__Parabacteroides; s__Parabacteroides_gordonii
ASV179	132	136	225	673	k__Bacteria; p__Bacteroidota; c__Bacteroidia; o__Bacteroidales; f__Muribaculaceae; g__unclassified_Muribaculaceae; s__unclassified_Muribaculaceae
ASV181	0	0	236	466	k__Bacteria; p__Bacteroidota; c__Bacteroidia; o__Bacteroidales; f__Muribaculaceae; g__unclassified_Muribaculaceae; s__unclassified_Muribaculaceae
ASV182	0	611	537	0	k__Bacteria; p__Firmicutes; c__Clostridia; o__Lachnospirales; f__Lachnospiraceae; g__Lachnospiraceae_NK4A136_group; s__unclassified_Lachnospiraceae_NK4A136_group
ASV184	1187	194	675	1200	k__Bacteria; p__Firmicutes; c__Clostridia; o__Oscillospirales; f__Ruminococcaceae; g__[Eubacterium]_siraeum_group; s__unclassified_[Eubacterium]_siraeum_group
ASV185	14	0	0	0	k__Bacteria; p__Firmicutes; c__Clostridia; o__Lachnospirales; f__Lachnospiraceae; g__unclassified_Lachnospiraceae; s__unclassified_Lachnospiraceae
ASV186	56	607	658	474	k__Bacteria; p__Desulfobacterota; c__Desulfovibrionia; o__Desulfovibrionales; f__Desulfovibrionaceae; g__Desulfovibrio; s__unclassified_Desulfovibrio
ASV187	355	459	494	448	k__Bacteria; p__Bacteroidota; c__Bacteroidia; o__Bacteroidales; f__Muribaculaceae; g__unclassified_Muribaculaceae; s__unclassified_Muribaculaceae
ASV188	620	735	108	907	k__Bacteria; p__Firmicutes; c__Clostridia; o__Oscillospirales; f__Ruminococcaceae; g__Ruminococcus; s__unclassified_Ruminococcus
ASV189	110	152	628	432	k__Bacteria; p__Bacteroidota; c__Bacteroidia; o__Bacteroidales; f__Muribaculaceae; g__uncultured_Bacteroidales_bacterium; s__uncultured_Bacteroidales_bacterium
ASV190	40	349	24	302	k__Bacteria; p__Bacteroidota; c__Bacteroidia; o__Bacteroidales; f__Marinifilaceae; g__Odoribacter; s__unclassified_Odoribacter
ASV191	362	0	381	455	k__Bacteria; p__Bacteroidota; c__Bacteroidia; o__Bacteroidales; f__Muribaculaceae; g__unclassified_Muribaculaceae; s__unclassified_Muribaculaceae
ASV192	984	0	0	64	k__Bacteria; p__Firmicutes; c__Clostridia; o__Lachnospirales; f__Lachnospiraceae; g__Lachnospiraceae_NK4A136_group; s__unclassified_Lachnospiraceae_NK4A136_group
ASV193	0	8	0	0	k__Bacteria; p__Firmicutes; c__Bacilli; o__Lactobacillales; f__Enterococcaceae; g__Enterococcus; s__unclassified_Enterococcus
ASV194	915	187	893	294	k__Bacteria; p__Firmicutes; c__Bacilli; o__Erysipelotrichales; f__Erysipelotrichaceae; g__Allobaculum; s__uncultured_Allobaculum_sp.
ASV195	235	482	360	623	k__Bacteria; p__Firmicutes; c__Clostridia; o__Oscillospirales; f__Oscillospiraceae; g__NK4A214_group; s__unclassified_NK4A214_group
ASV196	0	0	0	180	k__Bacteria; p__Bacteroidota; c__Bacteroidia; o__Bacteroidales; f__Prevotellaceae; g__Prevotellaceae_NK3B31_group; s__unclassified_Prevotellaceae_NK3B31_group
ASV197	353	236	567	157	k__Bacteria; p__Firmicutes; c__Clostridia; o__Oscillospirales; f__Oscillospiraceae; g__Oscillibacter; s__unclassified_Oscillibacter
ASV198	0	1182	365	0	k__Bacteria; p__Desulfobacterota; c__Desulfovibrionia; o__Desulfovibrionales; f__Desulfovibrionaceae; g__Desulfovibrio; s__unclassified_Desulfovibrio
ASV199	0	294	1455	364	k__Bacteria; p__Bacteroidota; c__Bacteroidia; o__Bacteroidales; f__Muribaculaceae; g__Muribaculum; s__unclassified_Muribaculum
ASV200	0	0	0	792	k__Bacteria; p__Firmicutes; c__Clostridia; o__Lachnospirales; f__Lachnospiraceae; g__Lachnospiraceae_NK4A136_group; s__unclassified_Lachnospiraceae_NK4A136_group
ASV201	208	471	143	271	k__Bacteria; p__Firmicutes; c__Clostridia; o__Lachnospirales; f__Lachnospiraceae; g__unclassified_Lachnospiraceae; s__unclassified_Lachnospiraceae
ASV202	471	1488	0	371	k__Bacteria; p__Firmicutes; c__Clostridia; o__Oscillospirales; f__Ruminococcaceae; g__Ruminococcus; s__uncultured_Ruminococcus_sp.
ASV203	67	1689	1360	524	k__Bacteria; p__Firmicutes; c__Clostridia; o__Oscillospirales; f__[Eubacterium]_coprostanoligenes_group; g__unclassified_[Eubacterium]_coprostanoligenes_group; s__unclassified_[Eubacterium]_coprostanoligenes_group
ASV204	451	0	72	0	k__Bacteria; p__Firmicutes; c__Clostridia; o__Lachnospirales; f__Lachnospiraceae; g__Blautia; s__unclassified_Blautia
ASV205	0	69	0	0	k__Bacteria; p__Firmicutes; c__Clostridia; o__Lachnospirales; f__Lachnospiraceae; g__unclassified_Lachnospiraceae; s__unclassified_Lachnospiraceae
ASV206	0	544	424	0	k__Bacteria; p__Bacteroidota; c__Bacteroidia; o__Bacteroidales; f__Muribaculaceae; g__unclassified_Muribaculaceae; s__unclassified_Muribaculaceae
ASV207	215	106	74	341	k__Bacteria; p__Deferribacterota; c__Deferribacteres; o__Deferribacterales; f__Deferribacteraceae; g__Mucispirillum; s__Mucispirillum_sp._69
ASV208	0	0	0	82	k__Bacteria; p__Cyanobacteria; c__Vampirivibrionia; o__Gastranaerophilales; f__uncultured_rumen_bacterium; g__uncultured_rumen_bacterium; s__uncultured_rumen_bacterium
ASV209	425	17	109	114	k__Bacteria; p__Cyanobacteria; c__Vampirivibrionia; o__Gastranaerophilales; f__unclassified_Gastranaerophilales; g__unclassified_Gastranaerophilales; s__unclassified_Gastranaerophilales
ASV211	0	363	489	90	k__Bacteria; p__Bacteroidota; c__Bacteroidia; o__Bacteroidales; f__Muribaculaceae; g__unclassified_Muribaculaceae; s__unclassified_Muribaculaceae
ASV212	393	0	75	465	k__Bacteria; p__Bacteroidota; c__Bacteroidia; o__Bacteroidales; f__Rikenellaceae; g__Alistipes; s__unclassified_Alistipes
ASV213	403	70	78	1	k__Bacteria; p__Proteobacteria; c__Gammaproteobacteria; o__Pseudomonadales; f__Moraxellaceae; g__Psychrobacter; s__unclassified_Psychrobacter
ASV214	0	137	142	242	k__Bacteria; p__Firmicutes; c__Bacilli; o__Erysipelotrichales; f__Erysipelotrichaceae; g__unclassified_Erysipelotrichaceae; s__unclassified_Erysipelotrichaceae
ASV215	0	406	152	281	k__Bacteria; p__Firmicutes; c__Clostridia; o__Lachnospirales; f__Lachnospiraceae; g__unclassified_Lachnospiraceae; s__unclassified_Lachnospiraceae
ASV216	772	939	1461	0	k__Bacteria; p__Firmicutes; c__Bacilli; o__Erysipelotrichales; f__Erysipelotrichaceae; g__Allobaculum; s__uncultured_Allobaculum_sp.
ASV217	608	427	847	364	k__Bacteria; p__Bacteroidota; c__Bacteroidia; o__Bacteroidales; f__Rikenellaceae; g__Alistipes; s__unclassified_Alistipes
ASV218	157	251	181	300	k__Bacteria; p__Firmicutes; c__Clostridia; o__Oscillospirales; f__Oscillospiraceae; g__unclassified_Oscillospiraceae; s__unclassified_Oscillospiraceae
ASV219	956	79	599	517	k__Bacteria; p__Firmicutes; c__Clostridia; o__Oscillospirales; f__Ruminococcaceae; g__[Eubacterium]_siraeum_group; s__unclassified_[Eubacterium]_siraeum_group
ASV220	486	417	751	3	k__Bacteria; p__Firmicutes; c__Clostridia; o__Peptostreptococcales_Tissierellales; f__Peptostreptococcaceae; g__Romboutsia; s__unclassified_Romboutsia
ASV221	0	0	12	706	k__Bacteria; p__Firmicutes; c__Bacilli; o__Lactobacillales; f__Lactobacillaceae; g__Lactobacillus; s__Lactobacillus_intestinalis
ASV222	342	333	344	30	k__Bacteria; p__Firmicutes; c__Clostridia; o__Oscillospirales; f__Oscillospiraceae; g__unclassified_Oscillospiraceae; s__unclassified_Oscillospiraceae
ASV223	626	0	661	355	k__Bacteria; p__Firmicutes; c__Clostridia; o__Lachnospirales; f__Lachnospiraceae; g__unclassified_Lachnospiraceae; s__unclassified_Lachnospiraceae
ASV224	276	17	393	322	k__Bacteria; p__Actinobacteriota; c__Actinobacteria; o__Bifidobacteriales; f__Bifidobacteriaceae; g__Bifidobacterium; s__Bifidobacterium_animalis
ASV225	418	565	727	842	k__Bacteria; p__Firmicutes; c__Clostridia; o__Lachnospirales; f__Lachnospiraceae; g__unclassified_Lachnospiraceae; s__unclassified_Lachnospiraceae
ASV226	0	0	0	514	k__Bacteria; p__Firmicutes; c__Clostridia; o__Lachnospirales; f__Lachnospiraceae; g__Lachnospiraceae_NK4A136_group; s__unclassified_Lachnospiraceae_NK4A136_group
ASV227	127	384	146	261	k__Bacteria; p__Firmicutes; c__Clostridia; o__Oscillospirales; f__Oscillospiraceae; g__Oscillibacter; s__unclassified_Oscillibacter
ASV228	52	334	876	0	k__Bacteria; p__Firmicutes; c__Bacilli; o__Lactobacillales; f__Lactobacillaceae; g__Lactobacillus; s__unclassified_Lactobacillus
ASV229	114	422	398	121	k__Bacteria; p__Firmicutes; c__Clostridia; o__Oscillospirales; f__Oscillospiraceae; g__unclassified_Oscillospiraceae; s__unclassified_Oscillospiraceae
ASV230	67	366	297	489	k__Bacteria; p__Actinobacteriota; c__Coriobacteriia; o__Coriobacteriales; f__Eggerthellaceae; g__Gordonibacter; s__unclassified_Gordonibacter
ASV231	0	136	275	615	k__Bacteria; p__Actinobacteriota; c__Coriobacteriia; o__Coriobacteriales; f__Eggerthellaceae; g__Enterorhabdus; s__Adlercreutzia_mucosicola
ASV232	121	255	171	206	k__Bacteria; p__Firmicutes; c__Clostridia; o__Peptococcales; f__Peptococcaceae; g__unclassified_Peptococcaceae; s__unclassified_Peptococcaceae
ASV233	2	12	15	0	k__Bacteria; p__Proteobacteria; c__Gammaproteobacteria; o__Enterobacterales; f__Pasteurellaceae; g__Rodentibacter; s__unclassified_Rodentibacter
ASV234	0	0	0	60	k__Bacteria; p__Firmicutes; c__Clostridia; o__Lachnospirales; f__Lachnospiraceae; g__unclassified_Lachnospiraceae; s__unclassified_Lachnospiraceae
ASV235	0	172	0	0	k__Bacteria; p__Bacteroidota; c__Bacteroidia; o__Bacteroidales; f__Bacteroidaceae; g__Bacteroides; s__Bacteroides_caecimuris
ASV236	0	0	0	500	k__Bacteria; p__Bacteroidota; c__Bacteroidia; o__Bacteroidales; f__Muribaculaceae; g__uncultured_Bacteroidales_bacterium; s__uncultured_Bacteroidales_bacterium
ASV237	0	67	0	187	k__Bacteria; p__Firmicutes; c__Clostridia; o__Lachnospirales; f__Lachnospiraceae; g__unclassified_Lachnospiraceae; s__unclassified_Lachnospiraceae
ASV238	659	405	1222	0	k__Bacteria; p__Firmicutes; c__Bacilli; o__Erysipelotrichales; f__Erysipelotrichaceae; g__Allobaculum; s__uncultured_Allobaculum_sp.
ASV239	18	494	239	363	k__Bacteria; p__Firmicutes; c__Clostridia; o__Peptostreptococcales_Tissierellales; f__Anaerovoracaceae; g__unclassified_Anaerovoracaceae; s__unclassified_Anaerovoracaceae
ASV240	0	0	1273	82	k__Bacteria; p__Bacteroidota; c__Bacteroidia; o__Bacteroidales; f__Bacteroidaceae; g__Bacteroides; s__Bacteroides_intestinalis
ASV241	0	241	658	0	k__Bacteria; p__Bacteroidota; c__Bacteroidia; o__Bacteroidales; f__Muribaculaceae; g__unclassified_Muribaculaceae; s__unclassified_Muribaculaceae
ASV242	0	334	282	248	k__Bacteria; p__Bacteroidota; c__Bacteroidia; o__Bacteroidales; f__Muribaculaceae; g__unclassified_Muribaculaceae; s__unclassified_Muribaculaceae
ASV243	0	0	1556	0	k__Bacteria; p__Firmicutes; c__Clostridia; o__Lachnospirales; f__Lachnospiraceae; g__Anaerostipes; s__unclassified_Anaerostipes
ASV244	146	289	399	78	k__Bacteria; p__Firmicutes; c__Clostridia; o__Lachnospirales; f__Lachnospiraceae; g__Tuzzerella; s__unclassified_Tuzzerella
ASV245	116	325	237	280	k__Bacteria; p__Firmicutes; c__Clostridia; o__Peptostreptococcales_Tissierellales; f__Anaerovoracaceae; g__unclassified_Anaerovoracaceae; s__unclassified_Anaerovoracaceae
ASV246	551	373	69	0	k__Bacteria; p__Firmicutes; c__Bacilli; o__Erysipelotrichales; f__Erysipelotrichaceae; g__Turicibacter; s__unclassified_Turicibacter
ASV247	195	172	1619	111	k__Bacteria; p__Firmicutes; c__Clostridia; o__Lachnospirales; f__Lachnospiraceae; g__unclassified_Lachnospiraceae; s__unclassified_Lachnospiraceae
ASV248	170	429	142	259	k__Bacteria; p__Firmicutes; c__Clostridia; o__Oscillospirales; f__Oscillospiraceae; g__unclassified_Oscillospiraceae; s__unclassified_Oscillospiraceae
ASV249	0	0	0	554	k__Bacteria; p__Firmicutes; c__Clostridia; o__Lachnospirales; f__Lachnospiraceae; g__Roseburia; s__unclassified_Roseburia
ASV250	371	151	212	32	k__Bacteria; p__Firmicutes; c__Clostridia; o__Lachnospirales; f__Lachnospiraceae; g__unclassified_Lachnospiraceae; s__Clostridium_sp._Culture_27
ASV251	0	552	209	540	k__Bacteria; p__Firmicutes; c__Clostridia; o__Lachnospirales; f__Lachnospiraceae; g__Lachnospiraceae_NK4A136_group; s__unclassified_Lachnospiraceae_NK4A136_group
ASV252	0	0	0	24	k__Bacteria; p__Firmicutes; c__Clostridia; o__Lachnospirales; f__Lachnospiraceae; g__unclassified_Lachnospiraceae; s__unclassified_Lachnospiraceae
ASV253	182	168	456	258	k__Bacteria; p__Actinobacteriota; c__Coriobacteriia; o__Coriobacteriales; f__Eggerthellaceae; g__Enterorhabdus; s__unclassified_Enterorhabdus
ASV254	433	1040	0	0	k__Bacteria; p__Bacteroidota; c__Bacteroidia; o__Bacteroidales; f__Muribaculaceae; g__unclassified_Muribaculaceae; s__unclassified_Muribaculaceae
ASV255	0	0	0	1172	k__Bacteria; p__Bacteroidota; c__Bacteroidia; o__Bacteroidales; f__Muribaculaceae; g__unclassified_Muribaculaceae; s__unclassified_Muribaculaceae
ASV256	113	547	126	620	k__Bacteria; p__Patescibacteria; c__Saccharimonadia; o__Saccharimonadales; f__Saccharimonadaceae; g__Candidatus_Saccharimonas; s__unclassified_Candidatus_Saccharimonas
ASV257	0	286	122	115	k__Bacteria; p__Bacteroidota; c__Bacteroidia; o__Bacteroidales; f__Muribaculaceae; g__unclassified_Muribaculaceae; s__unclassified_Muribaculaceae
ASV258	20	1098	967	267	k__Bacteria; p__Firmicutes; c__Clostridia; o__Lachnospirales; f__Lachnospiraceae; g__unclassified_Lachnospiraceae; s__unclassified_Lachnospiraceae
ASV260	0	0	328	1364	k__Bacteria; p__Bacteroidota; c__Bacteroidia; o__Bacteroidales; f__Marinifilaceae; g__Odoribacter; s__unclassified_Odoribacter
ASV261	54	71	57	450	k__Bacteria; p__Bacteroidota; c__Bacteroidia; o__Bacteroidales; f__Muribaculaceae; g__uncultured_Bacteroidales_bacterium; s__uncultured_Bacteroidales_bacterium
ASV262	103	419	467	174	k__Bacteria; p__Bacteroidota; c__Bacteroidia; o__Bacteroidales; f__Muribaculaceae; g__uncultured_Bacteroidales_bacterium; s__uncultured_Bacteroidales_bacterium
ASV263	0	75	190	44	k__Bacteria; p__Firmicutes; c__Clostridia; o__Lachnospirales; f__Lachnospiraceae; g__unclassified_Lachnospiraceae; s__unclassified_Lachnospiraceae
ASV264	1246	1232	206	0	k__Bacteria; p__Firmicutes; c__Clostridia; o__Lachnospirales; f__Lachnospiraceae; g__unclassified_Lachnospiraceae; s__unclassified_Lachnospiraceae
ASV265	72	0	0	0	k__Bacteria; p__Firmicutes; c__Clostridia; o__Oscillospirales; f__[Eubacterium]_coprostanoligenes_group; g__unclassified_[Eubacterium]_coprostanoligenes_group; s__unclassified_[Eubacterium]_coprostanoligenes_group
ASV266	105	510	170	0	k__Bacteria; p__Firmicutes; c__Clostridia; o__Peptostreptococcales_Tissierellales; f__Anaerovoracaceae; g__[Eubacterium]_nodatum_group; s__unclassified_[Eubacterium]_nodatum_group
ASV267	230	186	179	12	k__Bacteria; p__Firmicutes; c__Bacilli; o__Acholeplasmatales; f__Acholeplasmataceae; g__Anaeroplasma; s__unclassified_Anaeroplasma
ASV268	0	450	86	123	k__Bacteria; p__Firmicutes; c__Clostridia; o__Lachnospirales; f__Lachnospiraceae; g__unclassified_Lachnospiraceae; s__unclassified_Lachnospiraceae
ASV269	0	0	0	838	k__Bacteria; p__Firmicutes; c__Clostridia; o__Oscillospirales; f__Ruminococcaceae; g__Ruminococcus; s__unclassified_Ruminococcus
ASV270	262	45	531	0	k__Bacteria; p__Firmicutes; c__Clostridia; o__Lachnospirales; f__Lachnospiraceae; g__Lachnospiraceae_NK4A136_group; s__unclassified_Lachnospiraceae_NK4A136_group
ASV271	310	665	367	70	k__Bacteria; p__Firmicutes; c__Clostridia; o__Oscillospirales; f__Oscillospiraceae; g__unclassified_Oscillospiraceae; s__unclassified_Oscillospiraceae
ASV272	96	208	57	209	k__Bacteria; p__Firmicutes; c__Clostridia; o__Oscillospirales; f__Oscillospiraceae; g__unclassified_Oscillospiraceae; s__unclassified_Oscillospiraceae
ASV273	209	218	213	122	k__Bacteria; p__Firmicutes; c__Clostridia; o__Oscillospirales; f__Oscillospiraceae; g__unclassified_Oscillospiraceae; s__unclassified_Oscillospiraceae
ASV274	420	206	164	0	k__Bacteria; p__Proteobacteria; c__Alphaproteobacteria; o__Rhodospirillales; f__unclassified_Rhodospirillales; g__unclassified_Rhodospirillales; s__unclassified_Rhodospirillales
ASV275	860	2397	62	0	k__Bacteria; p__Firmicutes; c__Clostridia; o__Lachnospirales; f__Lachnospiraceae; g__Lachnospiraceae_NK4A136_group; s__unclassified_Lachnospiraceae_NK4A136_group
ASV276	899	232	334	85	k__Bacteria; p__Bacteroidota; c__Bacteroidia; o__Bacteroidales; f__Muribaculaceae; g__unclassified_Muribaculaceae; s__unclassified_Muribaculaceae
ASV277	0	74	0	85	k__Bacteria; p__Firmicutes; c__Clostridia; o__Lachnospirales; f__Lachnospiraceae; g__unclassified_Lachnospiraceae; s__unclassified_Lachnospiraceae
ASV278	373	590	885	0	k__Bacteria; p__Bacteroidota; c__Bacteroidia; o__Bacteroidales; f__Tannerellaceae; g__Parabacteroides; s__Parabacteroides_johnsonii
ASV279	0	105	139	0	k__Bacteria; p__Bacteroidota; c__Bacteroidia; o__Bacteroidales; f__Muribaculaceae; g__unclassified_Muribaculaceae; s__unclassified_Muribaculaceae
ASV280	175	295	1088	190	k__Bacteria; p__Firmicutes; c__Clostridia; o__Lachnospirales; f__Lachnospiraceae; g__unclassified_Lachnospiraceae; s__unclassified_Lachnospiraceae
ASV281	23	119	49	97	k__Bacteria; p__Firmicutes; c__Clostridia; o__Lachnospirales; f__Lachnospiraceae; g__unclassified_Lachnospiraceae; s__unclassified_Lachnospiraceae
ASV282	127	288	42	320	k__Bacteria; p__Firmicutes; c__Clostridia; o__Lachnospirales; f__Lachnospiraceae; g__Lachnospiraceae_NK4A136_group; s__unclassified_Lachnospiraceae_NK4A136_group
ASV283	0	483	1441	235	k__Bacteria; p__Firmicutes; c__Clostridia; o__Lachnospirales; f__Lachnospiraceae; g__unclassified_Lachnospiraceae; s__unclassified_Lachnospiraceae
ASV285	0	0	93	88	k__Bacteria; p__Cyanobacteria; c__Vampirivibrionia; o__Gastranaerophilales; f__unclassified_Gastranaerophilales; g__unclassified_Gastranaerophilales; s__unclassified_Gastranaerophilales
ASV286	230	0	749	0	k__Bacteria; p__Firmicutes; c__Clostridia; o__Lachnospirales; f__Lachnospiraceae; g__Lachnospiraceae_NK4A136_group; s__unclassified_Lachnospiraceae_NK4A136_group
ASV287	0	39	31	0	k__Bacteria; p__Firmicutes; c__Bacilli; o__Lactobacillales; f__Enterococcaceae; g__Enterococcus; s__unclassified_Enterococcus
ASV288	90	186	252	191	k__Bacteria; p__Firmicutes; c__Clostridia; o__Lachnospirales; f__Lachnospiraceae; g__unclassified_Lachnospiraceae; s__unclassified_Lachnospiraceae
ASV289	178	498	133	602	k__Bacteria; p__Bacteroidota; c__Bacteroidia; o__Bacteroidales; f__Rikenellaceae; g__Alistipes; s__Alistipes_sp._cv1
ASV290	88	115	121	369	k__Bacteria; p__Firmicutes; c__Clostridia; o__Oscillospirales; f__UCG_010; g__unclassified_UCG_010; s__unclassified_UCG_010
ASV291	532	379	53	85	k__Bacteria; p__Firmicutes; c__Clostridia; o__Oscillospirales; f__Oscillospiraceae; g__unclassified_Oscillospiraceae; s__unclassified_Oscillospiraceae
ASV292	0	363	249	0	k__Bacteria; p__Firmicutes; c__Clostridia; o__Lachnospirales; f__Lachnospiraceae; g__unclassified_Lachnospiraceae; s__unclassified_Lachnospiraceae
ASV293	34	223	237	594	k__Bacteria; p__Bacteroidota; c__Bacteroidia; o__Bacteroidales; f__Muribaculaceae; g__unclassified_Muribaculaceae; s__unclassified_Muribaculaceae
ASV294	0	16	0	0	k__Bacteria; p__Bacteroidota; c__Bacteroidia; o__Bacteroidales; f__Muribaculaceae; g__uncultured_Bacteroidales_bacterium; s__uncultured_Bacteroidales_bacterium
ASV295	2096	49	34	0	k__Bacteria; p__Proteobacteria; c__Alphaproteobacteria; o__Rhodospirillales; f__unclassified_Rhodospirillales; g__uncultured_rumen_bacterium; s__unclassified_Rhodospirillales
ASV296	96	452	649	0	k__Bacteria; p__Firmicutes; c__Clostridia; o__Oscillospirales; f__Oscillospiraceae; g__NK4A214_group; s__unclassified_NK4A214_group
ASV298	80	163	194	267	k__Bacteria; p__Bacteroidota; c__Bacteroidia; o__Bacteroidales; f__Muribaculaceae; g__unclassified_Muribaculaceae; s__unclassified_Muribaculaceae
ASV299	0	189	116	386	k__Bacteria; p__Firmicutes; c__Clostridia; o__Lachnospirales; f__Lachnospiraceae; g__unclassified_Lachnospiraceae; s__unclassified_Lachnospiraceae
ASV300	43	447	362	177	k__Bacteria; p__Firmicutes; c__Clostridia; o__Oscillospirales; f__UCG_010; g__unclassified_UCG_010; s__unclassified_UCG_010
ASV301	891	692	95	24	k__Bacteria; p__Firmicutes; c__Clostridia; o__Lachnospirales; f__Lachnospiraceae; g__unclassified_Lachnospiraceae; s__unclassified_Lachnospiraceae
ASV302	0	0	0	202	k__Bacteria; p__Bacteroidota; c__Bacteroidia; o__Bacteroidales; f__Muribaculaceae; g__unclassified_Muribaculaceae; s__unclassified_Muribaculaceae
ASV304	473	79	360	14	k__Bacteria; p__Firmicutes; c__Clostridia; o__Oscillospirales; f__unclassified_Oscillospirales; g__unclassified_Oscillospirales; s__unclassified_Oscillospirales
ASV305	57	988	223	437	k__Bacteria; p__Patescibacteria; c__Saccharimonadia; o__Saccharimonadales; f__Saccharimonadaceae; g__Candidatus_Saccharimonas; s__unclassified_Candidatus_Saccharimonas
ASV306	0	157	529	103	k__Bacteria; p__Bacteroidota; c__Bacteroidia; o__Bacteroidales; f__Muribaculaceae; g__unclassified_Muribaculaceae; s__unclassified_Muribaculaceae
ASV307	82	573	343	12	k__Bacteria; p__Firmicutes; c__Clostridia; o__Lachnospirales; f__Lachnospiraceae; g__unclassified_Lachnospiraceae; s__Clostridium_sp._Culture_54
ASV309	238	0	0	1750	k__Bacteria; p__Firmicutes; c__Clostridia; o__Oscillospirales; f__Oscillospiraceae; g__unclassified_Oscillospiraceae; s__unclassified_Oscillospiraceae
ASV310	194	0	0	953	k__Bacteria; p__Firmicutes; c__Clostridia; o__Clostridia_UCG_014; f__unclassified_Clostridia_UCG_014; g__unclassified_Clostridia_UCG_014; s__unclassified_Clostridia_UCG_014
ASV311	0	0	0	323	k__Bacteria; p__Bacteroidota; c__Bacteroidia; o__Bacteroidales; f__Muribaculaceae; g__unclassified_Muribaculaceae; s__unclassified_Muribaculaceae
ASV313	415	137	316	23	k__Bacteria; p__Firmicutes; c__Clostridia; o__Lachnospirales; f__Lachnospiraceae; g__unclassified_Lachnospiraceae; s__unclassified_Lachnospiraceae
ASV314	883	559	340	26	k__Bacteria; p__Bacteroidota; c__Bacteroidia; o__Bacteroidales; f__Muribaculaceae; g__unclassified_Muribaculaceae; s__unclassified_Muribaculaceae
ASV316	66	0	215	0	k__Bacteria; p__Firmicutes; c__Bacilli; o__Erysipelotrichales; f__Erysipelatoclostridiaceae; g__Erysipelatoclostridium; s__unclassified_Erysipelatoclostridium
ASV317	0	1111	72	0	k__Bacteria; p__Firmicutes; c__Clostridia; o__Clostridia_UCG_014; f__unclassified_Clostridia_UCG_014; g__unclassified_Clostridia_UCG_014; s__unclassified_Clostridia_UCG_014
ASV318	417	250	425	101	k__Bacteria; p__Firmicutes; c__Clostridia; o__Lachnospirales; f__Defluviitaleaceae; g__Defluviitaleaceae_UCG_011; s__unclassified_Defluviitaleaceae_UCG_011
ASV319	3	967	209	128	k__Bacteria; p__Firmicutes; c__Clostridia; o__Oscillospirales; f__Butyricicoccaceae; g__Butyricicoccus; s__unclassified_Butyricicoccus
ASV320	0	200	1273	0	k__Bacteria; p__Bacteroidota; c__Bacteroidia; o__Bacteroidales; f__Bacteroidaceae; g__Bacteroides; s__Bacteroides_intestinalis
ASV321	0	0	0	338	k__Bacteria; p__Bacteroidota; c__Bacteroidia; o__Bacteroidales; f__Rikenellaceae; g__Alistipes; s__unclassified_Alistipes
ASV322	0	0	0	35	k__Bacteria; p__Proteobacteria; c__Gammaproteobacteria; o__Burkholderiales; f__Sutterellaceae; g__Parasutterella; s__Burkholderiales_bacterium_YL45
ASV323	74	41	277	703	k__Bacteria; p__Bacteroidota; c__Bacteroidia; o__Bacteroidales; f__Muribaculaceae; g__unclassified_Muribaculaceae; s__unclassified_Muribaculaceae
ASV324	436	212	270	172	k__Bacteria; p__Firmicutes; c__Clostridia; o__Oscillospirales; f__Oscillospiraceae; g__UCG_005; s__unclassified_UCG_005
ASV325	0	0	14	0	k__Bacteria; p__Firmicutes; c__Clostridia; o__Oscillospirales; f__Ruminococcaceae; g__Ruminococcus; s__unclassified_Ruminococcus
ASV326	0	0	12	463	k__Bacteria; p__Bacteroidota; c__Bacteroidia; o__Bacteroidales; f__Muribaculaceae; g__unclassified_Muribaculaceae; s__unclassified_Muribaculaceae
ASV328	0	38	117	0	k__Bacteria; p__Firmicutes; c__Clostridia; o__Lachnospirales; f__Lachnospiraceae; g__unclassified_Lachnospiraceae; s__unclassified_Lachnospiraceae
ASV329	0	0	80	211	k__Bacteria; p__Bacteroidota; c__Bacteroidia; o__Bacteroidales; f__Muribaculaceae; g__unclassified_Muribaculaceae; s__unclassified_Muribaculaceae
ASV330	0	305	84	149	k__Bacteria; p__Bacteroidota; c__Bacteroidia; o__Bacteroidales; f__Muribaculaceae; g__unclassified_Muribaculaceae; s__unclassified_Muribaculaceae
ASV331	518	239	308	0	k__Bacteria; p__Bacteroidota; c__Bacteroidia; o__Bacteroidales; f__Rikenellaceae; g__Alistipes; s__Alistipes_finegoldii
ASV332	0	161	72	339	k__Bacteria; p__Bacteroidota; c__Bacteroidia; o__Bacteroidales; f__Muribaculaceae; g__unclassified_Muribaculaceae; s__unclassified_Muribaculaceae
ASV333	0	0	828	0	k__Bacteria; p__Firmicutes; c__Clostridia; o__Lachnospirales; f__Lachnospiraceae; g__[Ruminococcus]_gnavus_group; s__unclassified_[Ruminococcus]_gnavus_group
ASV334	167	137	0	564	k__Bacteria; p__Firmicutes; c__Clostridia; o__Oscillospirales; f__Ruminococcaceae; g__Incertae_Sedis; s__unclassified_Incertae_Sedis
ASV335	7	275	36	232	k__Bacteria; p__Firmicutes; c__Clostridia; o__Oscillospirales; f__Ruminococcaceae; g__unclassified_Ruminococcaceae; s__unclassified_Ruminococcaceae
ASV336	32	0	0	0	k__Bacteria; p__Bacteroidota; c__Bacteroidia; o__Bacteroidales; f__Bacteroidaceae; g__Bacteroides; s__unclassified_Bacteroides
ASV337	0	0	0	24	k__Bacteria; p__Bacteroidota; c__Bacteroidia; o__Bacteroidales; f__Muribaculaceae; g__unclassified_Muribaculaceae; s__unclassified_Muribaculaceae
ASV338	2089	647	0	714	k__Bacteria; p__Firmicutes; c__Clostridia; o__Oscillospirales; f__Ruminococcaceae; g__Ruminococcus; s__unclassified_Ruminococcus
ASV339	585	607	0	0	k__Bacteria; p__Firmicutes; c__Clostridia; o__Clostridia_UCG_014; f__unclassified_Clostridia_UCG_014; g__unclassified_Clostridia_UCG_014; s__unclassified_Clostridia_UCG_014
ASV340	290	168	26	101	k__Bacteria; p__Firmicutes; c__Clostridia; o__Lachnospirales; f__Lachnospiraceae; g__Lachnospiraceae_NK4A136_group; s__unclassified_Lachnospiraceae_NK4A136_group
ASV341	0	0	0	158	k__Bacteria; p__Bacteroidota; c__Bacteroidia; o__Bacteroidales; f__Muribaculaceae; g__Muribaculum; s__unclassified_Muribaculum
ASV342	0	14	0	267	k__Bacteria; p__Bacteroidota; c__Bacteroidia; o__Bacteroidales; f__Rikenellaceae; g__Alistipes; s__unclassified_Alistipes
ASV343	70	66	47	221	k__Bacteria; p__Firmicutes; c__Clostridia; o__Oscillospirales; f__Oscillospiraceae; g__Colidextribacter; s__unclassified_Colidextribacter
ASV344	0	147	505	51	k__Bacteria; p__Bacteroidota; c__Bacteroidia; o__Bacteroidales; f__Tannerellaceae; g__Parabacteroides; s__unclassified_Parabacteroides
ASV345	75	0	388	159	k__Bacteria; p__Bacteroidota; c__Bacteroidia; o__Bacteroidales; f__Muribaculaceae; g__uncultured_Bacteroidales_bacterium; s__uncultured_Bacteroidales_bacterium
ASV346	95	274	0	107	k__Bacteria; p__Proteobacteria; c__Alphaproteobacteria; o__Rhodospirillales; f__unclassified_Rhodospirillales; g__unclassified_Rhodospirillales; s__unclassified_Rhodospirillales
ASV347	206	297	384	78	k__Bacteria; p__Bacteroidota; c__Bacteroidia; o__Bacteroidales; f__Muribaculaceae; g__unclassified_Muribaculaceae; s__unclassified_Muribaculaceae
ASV348	107	556	242	0	k__Bacteria; p__Firmicutes; c__Bacilli; o__Erysipelotrichales; f__Erysipelatoclostridiaceae; g__Erysipelatoclostridium; s__[Clostridium]_saccharogumia
ASV349	0	0	72	0	k__Bacteria; p__Bacteroidota; c__Bacteroidia; o__Bacteroidales; f__Muribaculaceae; g__unclassified_Muribaculaceae; s__unclassified_Muribaculaceae
ASV350	0	191	0	278	k__Bacteria; p__Bacteroidota; c__Bacteroidia; o__Bacteroidales; f__Muribaculaceae; g__unclassified_Muribaculaceae; s__unclassified_Muribaculaceae
ASV351	0	388	70	75	k__Bacteria; p__Bacteroidota; c__Bacteroidia; o__Bacteroidales; f__Muribaculaceae; g__unclassified_Muribaculaceae; s__unclassified_Muribaculaceae
ASV352	0	217	718	156	k__Bacteria; p__Firmicutes; c__Clostridia; o__Clostridia_UCG_014; f__unclassified_Clostridia_UCG_014; g__unclassified_Clostridia_UCG_014; s__unclassified_Clostridia_UCG_014
ASV353	523	0	0	0	k__Bacteria; p__Bacteroidota; c__Bacteroidia; o__Bacteroidales; f__Muribaculaceae; g__unclassified_Muribaculaceae; s__unclassified_Muribaculaceae
ASV354	0	136	236	117	k__Bacteria; p__Bacteroidota; c__Bacteroidia; o__Bacteroidales; f__Muribaculaceae; g__unclassified_Muribaculaceae; s__unclassified_Muribaculaceae
ASV355	482	397	0	0	k__Bacteria; p__Bacteroidota; c__Bacteroidia; o__Bacteroidales; f__Bacteroidaceae; g__Bacteroides; s__Bacteroides_caecimuris
ASV356	0	211	297	0	k__Bacteria; p__Bacteroidota; c__Bacteroidia; o__Bacteroidales; f__Muribaculaceae; g__uncultured_Bacteroidales_bacterium; s__uncultured_Bacteroidales_bacterium
ASV357	0	113	54	311	k__Bacteria; p__Patescibacteria; c__Saccharimonadia; o__Saccharimonadales; f__Saccharimonadaceae; g__Candidatus_Saccharimonas; s__unclassified_Candidatus_Saccharimonas
ASV358	85	0	0	0	k__Bacteria; p__Bacteroidota; c__Bacteroidia; o__Bacteroidales; f__Muribaculaceae; g__unclassified_Muribaculaceae; s__unclassified_Muribaculaceae
ASV359	31	261	25	32	k__Bacteria; p__Firmicutes; c__Clostridia; o__Oscillospirales; f__Oscillospiraceae; g__unclassified_Oscillospiraceae; s__unclassified_Oscillospiraceae
ASV360	97	139	119	144	k__Bacteria; p__Bacteroidota; c__Bacteroidia; o__Bacteroidales; f__Muribaculaceae; g__unclassified_Muribaculaceae; s__unclassified_Muribaculaceae
ASV361	305	243	117	0	k__Bacteria; p__Bacteroidota; c__Bacteroidia; o__Bacteroidales; f__Tannerellaceae; g__Parabacteroides; s__unclassified_Parabacteroides
ASV362	116	211	100	160	k__Bacteria; p__Firmicutes; c__Clostridia; o__unclassified_Clostridia; f__unclassified_Clostridia; g__unclassified_Clostridia; s__unclassified_Clostridia
ASV363	58	78	393	86	k__Bacteria; p__Bacteroidota; c__Bacteroidia; o__Bacteroidales; f__Muribaculaceae; g__unclassified_Muribaculaceae; s__unclassified_Muribaculaceae
ASV364	164	0	0	291	k__Bacteria; p__Firmicutes; c__Bacilli; o__Erysipelotrichales; f__Erysipelatoclostridiaceae; g__unclassified_Erysipelatoclostridiaceae; s__unclassified_Erysipelatoclostridiaceae
ASV365	0	259	123	442	k__Bacteria; p__Firmicutes; c__Clostridia; o__Lachnospirales; f__Lachnospiraceae; g__[Eubacterium]_xylanophilum_group; s__unclassified_[Eubacterium]_xylanophilum_group
ASV366	0	150	0	0	k__Bacteria; p__Bacteroidota; c__Bacteroidia; o__Bacteroidales; f__Bacteroidaceae; g__Bacteroides; s__unclassified_Bacteroides
ASV367	0	161	0	47	k__Bacteria; p__Firmicutes; c__Clostridia; o__Lachnospirales; f__Lachnospiraceae; g__GCA_900066575; s__unclassified_GCA_900066575
ASV368	0	170	0	66	k__Bacteria; p__Firmicutes; c__Clostridia; o__Clostridia_UCG_014; f__unclassified_Clostridia_UCG_014; g__unclassified_Clostridia_UCG_014; s__unclassified_Clostridia_UCG_014
ASV369	42	135	174	11	k__Bacteria; p__Firmicutes; c__Clostridia; o__Oscillospirales; f__Ruminococcaceae; g__UBA1819; s__unclassified_UBA1819
ASV370	0	579	172	0	k__Bacteria; p__Firmicutes; c__Clostridia; o__Lachnospirales; f__Lachnospiraceae; g__Lachnospiraceae_NK4A136_group; s__unclassified_Lachnospiraceae_NK4A136_group
ASV371	0	0	0	113	k__Bacteria; p__Firmicutes; c__Clostridia; o__Oscillospirales; f__Oscillospiraceae; g__Oscillibacter; s__Oscillibacter_sp._1_3
ASV372	88	161	208	81	k__Bacteria; p__Firmicutes; c__Clostridia; o__Oscillospirales; f__Oscillospiraceae; g__unclassified_Oscillospiraceae; s__unclassified_Oscillospiraceae
ASV373	84	135	367	166	k__Bacteria; p__Actinobacteriota; c__Coriobacteriia; o__Coriobacteriales; f__Eggerthellaceae; g__unclassified_Eggerthellaceae; s__unclassified_Eggerthellaceae
ASV374	125	332	253	85	k__Bacteria; p__Firmicutes; c__Clostridia; o__Lachnospirales; f__Lachnospiraceae; g__Blautia; s__unclassified_Blautia
ASV375	0	0	0	260	k__Bacteria; p__Firmicutes; c__Clostridia; o__Lachnospirales; f__Lachnospiraceae; g__unclassified_Lachnospiraceae; s__unclassified_Lachnospiraceae
ASV376	0	0	37	251	k__Bacteria; p__Bacteroidota; c__Bacteroidia; o__Bacteroidales; f__Muribaculaceae; g__unclassified_Muribaculaceae; s__unclassified_Muribaculaceae
ASV377	428	77	446	0	k__Bacteria; p__Firmicutes; c__Clostridia; o__Oscillospirales; f__Ruminococcaceae; g__unclassified_Ruminococcaceae; s__unclassified_Ruminococcaceae
ASV379	177	249	232	92	k__Bacteria; p__Firmicutes; c__Clostridia; o__Lachnospirales; f__Lachnospiraceae; g__Lachnospiraceae_UCG_006; s__unclassified_Lachnospiraceae_UCG_006
ASV380	900	0	0	0	k__Bacteria; p__Bacteroidota; c__Bacteroidia; o__Bacteroidales; f__Bacteroidaceae; g__Bacteroides; s__Phocaeicola_sartorii
ASV381	0	77	58	193	k__Bacteria; p__Firmicutes; c__Clostridia; o__Lachnospirales; f__Lachnospiraceae; g__unclassified_Lachnospiraceae; s__Clostridium_sp._Culture_41
ASV382	193	1323	916	0	k__Bacteria; p__Firmicutes; c__Clostridia; o__Lachnospirales; f__Lachnospiraceae; g__unclassified_Lachnospiraceae; s__unclassified_Lachnospiraceae
ASV383	661	0	0	67	k__Bacteria; p__Proteobacteria; c__Alphaproteobacteria; o__Rhodospirillales; f__unclassified_Rhodospirillales; g__unclassified_Rhodospirillales; s__unclassified_Rhodospirillales
ASV384	260	89	321	32	k__Bacteria; p__Firmicutes; c__Clostridia; o__Oscillospirales; f__Oscillospiraceae; g__Oscillibacter; s__unclassified_Oscillibacter
ASV385	488	110	343	77	k__Bacteria; p__Bacteroidota; c__Bacteroidia; o__Bacteroidales; f__Tannerellaceae; g__Parabacteroides; s__unclassified_Parabacteroides
ASV386	65	205	124	227	k__Bacteria; p__Firmicutes; c__Clostridia; o__Caldicoprobacterales; f__Caldicoprobacteraceae; g__Caldicoprobacter; s__unclassified_Caldicoprobacter
ASV387	120	202	268	28	k__Bacteria; p__Firmicutes; c__Clostridia; o__Lachnospirales; f__Defluviitaleaceae; g__Defluviitaleaceae_UCG_011; s__unclassified_Defluviitaleaceae_UCG_011
ASV388	0	168	0	615	k__Bacteria; p__Firmicutes; c__Clostridia; o__Oscillospirales; f__Oscillospiraceae; g__Oscillibacter; s__unclassified_Oscillibacter
ASV389	5	1892	30	5	k__Bacteria; p__Firmicutes; c__Bacilli; o__Lactobacillales; f__Aerococcaceae; g__Aerococcus; s__unclassified_Aerococcus
ASV390	0	414	315	0	k__Bacteria; p__Bacteroidota; c__Bacteroidia; o__Bacteroidales; f__Muribaculaceae; g__Muribaculum; s__unclassified_Muribaculum
ASV391	0	0	46	106	k__Bacteria; p__Firmicutes; c__Bacilli; o__Erysipelotrichales; f__Erysipelotrichaceae; g__unclassified_Erysipelotrichaceae; s__unclassified_Erysipelotrichaceae
ASV392	0	0	0	369	k__Bacteria; p__Firmicutes; c__Clostridia; o__Lachnospirales; f__Lachnospiraceae; g__unclassified_Lachnospiraceae; s__unclassified_Lachnospiraceae
ASV394	31	13	0	144	k__Bacteria; p__Firmicutes; c__Clostridia; o__Lachnospirales; f__Lachnospiraceae; g__unclassified_Lachnospiraceae; s__unclassified_Lachnospiraceae
ASV395	86	246	0	0	k__Bacteria; p__Firmicutes; c__Clostridia; o__Lachnospirales; f__Lachnospiraceae; g__Lachnospiraceae_UCG_006; s__unclassified_Lachnospiraceae_UCG_006
ASV397	0	997	0	176	k__Bacteria; p__Firmicutes; c__Clostridia; o__Clostridia_UCG_014; f__unclassified_Clostridia_UCG_014; g__unclassified_Clostridia_UCG_014; s__unclassified_Clostridia_UCG_014
ASV398	0	1100	151	256	k__Bacteria; p__Firmicutes; c__Clostridia; o__Oscillospirales; f__Ruminococcaceae; g__UBA1819; s__unclassified_UBA1819
ASV399	0	74	117	86	k__Bacteria; p__Firmicutes; c__Clostridia; o__Oscillospirales; f__Ruminococcaceae; g__unclassified_Ruminococcaceae; s__unclassified_Ruminococcaceae
ASV400	632	13	0	355	k__Bacteria; p__Actinobacteriota; c__Actinobacteria; o__Corynebacteriales; f__Corynebacteriaceae; g__Corynebacterium; s__Corynebacterium_urealyticum
ASV401	0	0	0	249	k__Bacteria; p__Firmicutes; c__Clostridia; o__Lachnospirales; f__Lachnospiraceae; g__[Eubacterium]_ventriosum_group; s__uncultured_Clostridiales_bacterium
ASV402	396	84	516	23	k__Bacteria; p__Bacteroidota; c__Bacteroidia; o__Bacteroidales; f__Tannerellaceae; g__Parabacteroides; s__unclassified_Parabacteroides
ASV403	0	222	121	0	k__Bacteria; p__Firmicutes; c__Clostridia; o__Oscillospirales; f__Oscillospiraceae; g__Oscillibacter; s__unclassified_Oscillibacter
ASV404	0	39	0	7	k__Bacteria; p__Bacteroidota; c__Bacteroidia; o__Bacteroidales; f__Tannerellaceae; g__Parabacteroides; s__Parabacteroides_gordonii
ASV406	58	185	108	154	k__Bacteria; p__Patescibacteria; c__Saccharimonadia; o__Saccharimonadales; f__Saccharimonadaceae; g__Candidatus_Saccharimonas; s__unclassified_Candidatus_Saccharimonas
ASV407	0	421	0	94	k__Bacteria; p__Bacteroidota; c__Bacteroidia; o__Bacteroidales; f__Muribaculaceae; g__unclassified_Muribaculaceae; s__unclassified_Muribaculaceae
ASV408	49	67	0	165	k__Bacteria; p__Firmicutes; c__Clostridia; o__Oscillospirales; f__Oscillospiraceae; g__unclassified_Oscillospiraceae; s__unclassified_Oscillospiraceae
ASV409	104	26	294	0	k__Bacteria; p__Firmicutes; c__Clostridia; o__Oscillospirales; f__Oscillospiraceae; g__Intestinimonas; s__unclassified_Intestinimonas
ASV410	32	130	97	5	k__Bacteria; p__Firmicutes; c__Clostridia; o__Oscillospirales; f__Oscillospiraceae; g__unclassified_Oscillospiraceae; s__unclassified_Oscillospiraceae
ASV412	177	125	137	134	k__Bacteria; p__Desulfobacterota; c__Desulfovibrionia; o__Desulfovibrionales; f__Desulfovibrionaceae; g__unclassified_Desulfovibrionaceae; s__uncultured_Desulfovibrionales_bacterium
ASV413	223	292	210	0	k__Bacteria; p__Bacteroidota; c__Bacteroidia; o__Bacteroidales; f__Muribaculaceae; g__unclassified_Muribaculaceae; s__unclassified_Muribaculaceae
ASV414	0	512	352	281	k__Bacteria; p__Firmicutes; c__Clostridia; o__Peptococcales; f__Peptococcaceae; g__unclassified_Peptococcaceae; s__unclassified_Peptococcaceae
ASV415	364	0	0	0	k__Bacteria; p__Firmicutes; c__Clostridia; o__Lachnospirales; f__Lachnospiraceae; g__Lachnospiraceae_NK4A136_group; s__unclassified_Lachnospiraceae_NK4A136_group
ASV416	311	1026	177	0	k__Bacteria; p__Firmicutes; c__Clostridia; o__Lachnospirales; f__Lachnospiraceae; g__unclassified_Lachnospiraceae; s__unclassified_Lachnospiraceae
ASV417	88	35	53	169	k__Bacteria; p__Firmicutes; c__Clostridia; o__Oscillospirales; f__Ruminococcaceae; g__unclassified_Ruminococcaceae; s__unclassified_Ruminococcaceae
ASV418	0	0	278	319	k__Bacteria; p__Bacteroidota; c__Bacteroidia; o__Bacteroidales; f__Muribaculaceae; g__unclassified_Muribaculaceae; s__unclassified_Muribaculaceae
ASV419	125	180	42	5	k__Bacteria; p__Firmicutes; c__Clostridia; o__Oscillospirales; f__Oscillospiraceae; g__unclassified_Oscillospiraceae; s__unclassified_Oscillospiraceae
ASV420	0	251	198	0	k__Bacteria; p__Firmicutes; c__Clostridia; o__Lachnospirales; f__Lachnospiraceae; g__Lachnospiraceae_NK4A136_group; s__unclassified_Lachnospiraceae_NK4A136_group
ASV421	21	101	99	238	k__Bacteria; p__Firmicutes; c__Clostridia; o__Monoglobales; f__Monoglobaceae; g__Monoglobus; s__unclassified_Monoglobus
ASV422	55	38	143	0	k__Bacteria; p__Firmicutes; c__Clostridia; o__Lachnospirales; f__Lachnospiraceae; g__Blautia; s__unclassified_Blautia
ASV424	0	206	105	169	k__Bacteria; p__Bacteroidota; c__Bacteroidia; o__Bacteroidales; f__Muribaculaceae; g__uncultured_Muribaculaceae_bacterium; s__uncultured_Muribaculaceae_bacterium
ASV425	46	114	106	0	k__Bacteria; p__Firmicutes; c__Clostridia; o__Lachnospirales; f__Lachnospiraceae; g__unclassified_Lachnospiraceae; s__unclassified_Lachnospiraceae
ASV426	65	59	108	121	k__Bacteria; p__Firmicutes; c__Clostridia; o__Oscillospirales; f__Ruminococcaceae; g__unclassified_Ruminococcaceae; s__unclassified_Ruminococcaceae
ASV427	0	24	239	139	k__Bacteria; p__Bacteroidota; c__Bacteroidia; o__Bacteroidales; f__Muribaculaceae; g__unclassified_Muribaculaceae; s__unclassified_Muribaculaceae
ASV429	212	133	27	0	k__Bacteria; p__Bacteroidota; c__Bacteroidia; o__Bacteroidales; f__Tannerellaceae; g__Parabacteroides; s__unclassified_Parabacteroides
ASV430	70	89	19	318	k__Bacteria; p__Bacteroidota; c__Bacteroidia; o__Bacteroidales; f__Rikenellaceae; g__Rikenella; s__unclassified_Rikenella
ASV431	0	1536	0	0	k__Bacteria; p__Firmicutes; c__Clostridia; o__Lachnospirales; f__Lachnospiraceae; g__Anaerostipes; s__unclassified_Anaerostipes
ASV432	36	17	0	0	k__Bacteria; p__Firmicutes; c__Clostridia; o__Lachnospirales; f__Lachnospiraceae; g__unclassified_Lachnospiraceae; s__unclassified_Lachnospiraceae
ASV434	0	106	0	0	k__Bacteria; p__Firmicutes; c__Clostridia; o__Lachnospirales; f__Lachnospiraceae; g__unclassified_Lachnospiraceae; s__unclassified_Lachnospiraceae
ASV435	121	0	0	115	k__Bacteria; p__Firmicutes; c__Clostridia; o__Clostridia_UCG_014; f__unclassified_Clostridia_UCG_014; g__unclassified_Clostridia_UCG_014; s__unclassified_Clostridia_UCG_014
ASV436	35	262	75	134	k__Bacteria; p__Firmicutes; c__Clostridia; o__Monoglobales; f__Monoglobaceae; g__Monoglobus; s__unclassified_Monoglobus
ASV437	66	292	95	99	k__Bacteria; p__Firmicutes; c__Clostridia; o__Lachnospirales; f__Lachnospiraceae; g__unclassified_Lachnospiraceae; s__unclassified_Lachnospiraceae
ASV438	0	0	0	89	k__Bacteria; p__Bacteroidota; c__Bacteroidia; o__Bacteroidales; f__Rikenellaceae; g__Alistipes; s__unclassified_Alistipes
ASV439	399	0	17	92	k__Bacteria; p__Firmicutes; c__Bacilli; o__Lactobacillales; f__Aerococcaceae; g__Facklamia; s__unclassified_Facklamia
ASV440	0	548	76	0	k__Bacteria; p__Firmicutes; c__Clostridia; o__Clostridia_UCG_014; f__unclassified_Clostridia_UCG_014; g__unclassified_Clostridia_UCG_014; s__unclassified_Clostridia_UCG_014
ASV441	0	0	0	645	k__Bacteria; p__Bacteroidota; c__Bacteroidia; o__Bacteroidales; f__Muribaculaceae; g__unclassified_Muribaculaceae; s__unclassified_Muribaculaceae
ASV443	20	275	445	46	k__Bacteria; p__Firmicutes; c__Clostridia; o__Lachnospirales; f__Lachnospiraceae; g__Blautia; s__unclassified_Blautia
ASV444	0	546	0	526	k__Bacteria; p__Firmicutes; c__Clostridia; o__Clostridia_UCG_014; f__unclassified_Clostridia_UCG_014; g__unclassified_Clostridia_UCG_014; s__unclassified_Clostridia_UCG_014
ASV445	0	194	0	28	k__Bacteria; p__Bacteroidota; c__Bacteroidia; o__Bacteroidales; f__Muribaculaceae; g__uncultured_Bacteroidales_bacterium; s__uncultured_Bacteroidales_bacterium
ASV446	0	0	152	159	k__Bacteria; p__Bacteroidota; c__Bacteroidia; o__Bacteroidales; f__Muribaculaceae; g__unclassified_Muribaculaceae; s__unclassified_Muribaculaceae
ASV447	59	219	195	0	k__Bacteria; p__Bacteroidota; c__Bacteroidia; o__Bacteroidales; f__Marinifilaceae; g__Odoribacter; s__unclassified_Odoribacter
ASV448	32	385	120	241	k__Bacteria; p__Actinobacteriota; c__Coriobacteriia; o__Coriobacteriales; f__Eggerthellaceae; g__Enterorhabdus; s__unclassified_Enterorhabdus
ASV449	151	0	93	0	k__Bacteria; p__Firmicutes; c__Clostridia; o__Lachnospirales; f__Lachnospiraceae; g__Frisingicoccus; s__unclassified_Frisingicoccus
ASV450	75	47	12	31	k__Bacteria; p__Proteobacteria; c__Alphaproteobacteria; o__Rhodospirillales; f__unclassified_Rhodospirillales; g__unclassified_Rhodospirillales; s__unclassified_Rhodospirillales
ASV451	0	61	517	0	k__Bacteria; p__Bacteroidota; c__Bacteroidia; o__Bacteroidales; f__Bacteroidaceae; g__Bacteroides; s__Bacteroides_intestinalis
ASV452	147	138	125	195	k__Bacteria; p__Firmicutes; c__Clostridia; o__Christensenellales; f__Christensenellaceae; g__Christensenellaceae_R_7_group; s__unclassified_Christensenellaceae_R_7_group
ASV453	1195	330	0	0	k__Bacteria; p__Firmicutes; c__Clostridia; o__Lachnospirales; f__Lachnospiraceae; g__unclassified_Lachnospiraceae; s__unclassified_Lachnospiraceae
ASV454	153	72	53	202	k__Bacteria; p__Bacteroidota; c__Bacteroidia; o__Bacteroidales; f__Muribaculaceae; g__unclassified_Muribaculaceae; s__unclassified_Muribaculaceae
ASV455	38	17	231	194	k__Bacteria; p__Firmicutes; c__Bacilli; o__Erysipelotrichales; f__Erysipelatoclostridiaceae; g__unclassified_Erysipelatoclostridiaceae; s__unclassified_Erysipelatoclostridiaceae
ASV457	0	49	0	0	k__Bacteria; p__Firmicutes; c__Clostridia; o__Oscillospirales; f__Oscillospiraceae; g__Colidextribacter; s__unclassified_Colidextribacter
ASV458	0	71	129	61	k__Bacteria; p__Firmicutes; c__Bacilli; o__Erysipelotrichales; f__Erysipelotrichaceae; g__Dubosiella; s__unclassified_Dubosiella
ASV459	0	23	145	42	k__Bacteria; p__Firmicutes; c__Clostridia; o__Lachnospirales; f__Lachnospiraceae; g__Lachnospiraceae_NK4A136_group; s__Lachnospiraceae_bacterium_COE1
ASV460	0	0	533	46	k__Bacteria; p__Firmicutes; c__Clostridia; o__Lachnospirales; f__Lachnospiraceae; g__Roseburia; s__Roseburia_intestinalis
ASV461	0	296	165	329	k__Bacteria; p__Actinobacteriota; c__Coriobacteriia; o__Coriobacteriales; f__Eggerthellaceae; g__Enterorhabdus; s__unclassified_Enterorhabdus
ASV462	0	59	91	72	k__Bacteria; p__Firmicutes; c__Clostridia; o__Lachnospirales; f__Lachnospiraceae; g__unclassified_Lachnospiraceae; s__unclassified_Lachnospiraceae
ASV463	101	0	85	82	k__Bacteria; p__Firmicutes; c__Clostridia; o__Oscillospirales; f__Ruminococcaceae; g__uncultured_Clostridiales_bacterium; s__uncultured_Clostridiales_bacterium
ASV464	0	95	0	0	k__Bacteria; p__Bacteroidota; c__Bacteroidia; o__Bacteroidales; f__Muribaculaceae; g__unclassified_Muribaculaceae; s__unclassified_Muribaculaceae
ASV465	79	298	92	58	k__Bacteria; p__Desulfobacterota; c__Desulfovibrionia; o__Desulfovibrionales; f__Desulfovibrionaceae; g__Bilophila; s__unclassified_Bilophila
ASV466	0	0	0	175	k__Bacteria; p__Bacteroidota; c__Bacteroidia; o__Bacteroidales; f__Muribaculaceae; g__unclassified_Muribaculaceae; s__unclassified_Muribaculaceae
ASV467	0	0	51	242	k__Bacteria; p__Bacteroidota; c__Bacteroidia; o__Bacteroidales; f__Rikenellaceae; g__Alistipes; s__unclassified_Alistipes
ASV468	0	28	0	13	k__Bacteria; p__Firmicutes; c__Clostridia; o__Lachnospirales; f__Lachnospiraceae; g__Lachnospiraceae_NK4A136_group; s__unclassified_Lachnospiraceae_NK4A136_group
ASV469	99	0	184	7	k__Bacteria; p__Firmicutes; c__Clostridia; o__Peptostreptococcales_Tissierellales; f__Peptostreptococcaceae; g__Romboutsia; s__unclassified_Romboutsia
ASV470	62	133	36	0	k__Bacteria; p__Firmicutes; c__Clostridia; o__Lachnospirales; f__Lachnospiraceae; g__GCA_900066575; s__unclassified_GCA_900066575
ASV471	0	0	0	223	k__Bacteria; p__Firmicutes; c__Clostridia; o__Lachnospirales; f__Lachnospiraceae; g__unclassified_Lachnospiraceae; s__unclassified_Lachnospiraceae
ASV472	335	0	63	0	k__Bacteria; p__Firmicutes; c__Clostridia; o__Lachnospirales; f__Lachnospiraceae; g__GCA_900066575; s__unclassified_GCA_900066575
ASV473	39	51	48	47	k__Bacteria; p__Firmicutes; c__Clostridia; o__Oscillospirales; f__Ruminococcaceae; g__Anaerotruncus; s__Anaerotruncus_colihominis
ASV474	31	64	67	93	k__Bacteria; p__Firmicutes; c__Clostridia; o__Oscillospirales; f__Ruminococcaceae; g__Negativibacillus; s__unclassified_Negativibacillus
ASV475	0	83	0	254	k__Bacteria; p__Firmicutes; c__Clostridia; o__unclassified_Clostridia; f__unclassified_Clostridia; g__unclassified_Clostridia; s__unclassified_Clostridia
ASV476	112	0	0	0	k__Bacteria; p__Firmicutes; c__Clostridia; o__Oscillospirales; f__Ruminococcaceae; g__Anaerotruncus; s__unclassified_Anaerotruncus
ASV477	0	0	0	273	k__Bacteria; p__Bacteroidota; c__Bacteroidia; o__Bacteroidales; f__Muribaculaceae; g__unclassified_Muribaculaceae; s__unclassified_Muribaculaceae
ASV478	19	0	75	101	k__Bacteria; p__Firmicutes; c__Bacilli; o__Acholeplasmatales; f__Acholeplasmataceae; g__Anaeroplasma; s__unclassified_Anaeroplasma
ASV479	352	136	310	0	k__Bacteria; p__Bacteroidota; c__Bacteroidia; o__Bacteroidales; f__Tannerellaceae; g__Parabacteroides; s__unclassified_Parabacteroides
ASV480	0	0	0	199	k__Bacteria; p__Bacteroidota; c__Bacteroidia; o__Bacteroidales; f__Muribaculaceae; g__unclassified_Muribaculaceae; s__unclassified_Muribaculaceae
ASV481	0	349	0	0	k__Bacteria; p__Firmicutes; c__Clostridia; o__Lachnospirales; f__Lachnospiraceae; g__Blautia; s__unclassified_Blautia
ASV482	8	172	68	46	k__Bacteria; p__Firmicutes; c__Clostridia; o__Lachnospirales; f__Lachnospiraceae; g__unclassified_Lachnospiraceae; s__unclassified_Lachnospiraceae
ASV483	0	0	238	0	k__Bacteria; p__Bacteroidota; c__Bacteroidia; o__Bacteroidales; f__Muribaculaceae; g__uncultured_Barnesiella_sp.; s__uncultured_Barnesiella_sp.
ASV484	20	0	26	82	k__Bacteria; p__Firmicutes; c__Clostridia; o__Oscillospirales; f__Ruminococcaceae; g__unclassified_Ruminococcaceae; s__unclassified_Ruminococcaceae
ASV485	69	0	0	0	k__Bacteria; p__Firmicutes; c__Clostridia; o__Oscillospirales; f__Oscillospiraceae; g__unclassified_Oscillospiraceae; s__unclassified_Oscillospiraceae
ASV486	533	140	188	45	k__Bacteria; p__Firmicutes; c__Clostridia; o__Oscillospirales; f__UCG_010; g__unclassified_UCG_010; s__unclassified_UCG_010
ASV488	918	0	776	142	k__Bacteria; p__Firmicutes; c__Clostridia; o__Oscillospirales; f__Oscillospiraceae; g__unclassified_Oscillospiraceae; s__unclassified_Oscillospiraceae
ASV489	0	0	56	0	k__Bacteria; p__Bacteroidota; c__Bacteroidia; o__Bacteroidales; f__Muribaculaceae; g__unclassified_Muribaculaceae; s__unclassified_Muribaculaceae
ASV490	273	142	21	0	k__Bacteria; p__Firmicutes; c__Clostridia; o__Lachnospirales; f__Lachnospiraceae; g__Lachnospiraceae_NK4A136_group; s__unclassified_Lachnospiraceae_NK4A136_group
ASV491	0	53	0	0	k__Bacteria; p__Bacteroidota; c__Bacteroidia; o__Bacteroidales; f__Muribaculaceae; g__uncultured_Bacteroidales_bacterium; s__uncultured_Bacteroidales_bacterium
ASV492	20	226	53	54	k__Bacteria; p__Firmicutes; c__Clostridia; o__Oscillospirales; f__Butyricicoccaceae; g__UCG_009; s__unclassified_UCG_009
ASV493	0	885	261	48	k__Bacteria; p__Firmicutes; c__Clostridia; o__Lachnospirales; f__Lachnospiraceae; g__unclassified_Lachnospiraceae; s__unclassified_Lachnospiraceae
ASV494	0	137	219	0	k__Bacteria; p__Bacteroidota; c__Bacteroidia; o__Bacteroidales; f__Muribaculaceae; g__unclassified_Muribaculaceae; s__unclassified_Muribaculaceae
ASV495	21	113	90	89	k__Bacteria; p__Firmicutes; c__Clostridia; o__Oscillospirales; f__Ruminococcaceae; g__unclassified_Ruminococcaceae; s__unclassified_Ruminococcaceae
ASV496	0	173	36	151	k__Bacteria; p__Firmicutes; c__Clostridia; o__Oscillospirales; f__Oscillospiraceae; g__Oscillibacter; s__unclassified_Oscillibacter
ASV497	0	0	167	98	k__Bacteria; p__Firmicutes; c__Clostridia; o__Lachnospirales; f__Lachnospiraceae; g__Roseburia; s__Eubacterium_plexicaudatum
ASV498	415	860	0	0	k__Bacteria; p__Firmicutes; c__Clostridia; o__Lachnospirales; f__Lachnospiraceae; g__unclassified_Lachnospiraceae; s__unclassified_Lachnospiraceae
ASV499	865	421	0	0	k__Bacteria; p__Firmicutes; c__Clostridia; o__Lachnospirales; f__Lachnospiraceae; g__unclassified_Lachnospiraceae; s__unclassified_Lachnospiraceae
ASV500	0	0	0	145	k__Bacteria; p__Firmicutes; c__Clostridia; o__Lachnospirales; f__Lachnospiraceae; g__unclassified_Lachnospiraceae; s__unclassified_Lachnospiraceae
ASV501	0	0	0	35	k__Bacteria; p__Firmicutes; c__Clostridia; o__Lachnospirales; f__Lachnospiraceae; g__Marvinbryantia; s__unclassified_Marvinbryantia
ASV502	0	0	0	338	k__Bacteria; p__Firmicutes; c__Bacilli; o__unclassified_Bacilli; f__unclassified_Bacilli; g__unclassified_Bacilli; s__unclassified_Bacilli
ASV503	596	0	252	0	k__Bacteria; p__Bacteroidota; c__Bacteroidia; o__Bacteroidales; f__Muribaculaceae; g__unclassified_Muribaculaceae; s__unclassified_Muribaculaceae
ASV505	0	272	0	0	k__Bacteria; p__Firmicutes; c__Clostridia; o__Clostridia_UCG_014; f__unclassified_Clostridia_UCG_014; g__unclassified_Clostridia_UCG_014; s__unclassified_Clostridia_UCG_014
ASV506	84	185	0	0	k__Bacteria; p__Bacteroidota; c__Bacteroidia; o__Bacteroidales; f__Bacteroidaceae; g__Bacteroides; s__Phocaeicola_sartorii
ASV508	266	0	0	115	k__Bacteria; p__Bacteroidota; c__Bacteroidia; o__Bacteroidales; f__Muribaculaceae; g__unclassified_Muribaculaceae; s__unclassified_Muribaculaceae
ASV509	5	0	139	188	k__Bacteria; p__Firmicutes; c__Bacilli; o__Erysipelotrichales; f__Erysipelatoclostridiaceae; g__Candidatus_Stoquefichus; s__unclassified_Candidatus_Stoquefichus
ASV512	0	0	0	137	k__Bacteria; p__Firmicutes; c__Clostridia; o__Lachnospirales; f__Lachnospiraceae; g__[Eubacterium]_xylanophilum_group; s__unclassified_[Eubacterium]_xylanophilum_group
ASV513	0	237	250	0	k__Bacteria; p__Firmicutes; c__Clostridia; o__Oscillospirales; f__Oscillospiraceae; g__Colidextribacter; s__unclassified_Colidextribacter
ASV514	0	276	25	62	k__Bacteria; p__Firmicutes; c__Clostridia; o__Lachnospirales; f__Lachnospiraceae; g__unclassified_Lachnospiraceae; s__unclassified_Lachnospiraceae
ASV515	0	0	0	172	k__Bacteria; p__Firmicutes; c__Clostridia; o__Lachnospirales; f__Lachnospiraceae; g__unclassified_Lachnospiraceae; s__unclassified_Lachnospiraceae
ASV516	95	326	21	3	k__Bacteria; p__Proteobacteria; c__Alphaproteobacteria; o__Rhodospirillales; f__unclassified_Rhodospirillales; g__unclassified_Rhodospirillales; s__unclassified_Rhodospirillales
ASV517	149	44	156	0	k__Bacteria; p__Firmicutes; c__Clostridia; o__Lachnospirales; f__Lachnospiraceae; g__Lachnospiraceae_NK4A136_group; s__uncultured_Clostridiales_bacterium
ASV518	37	0	40	0	k__Bacteria; p__Firmicutes; c__Clostridia; o__Lachnospirales; f__Lachnospiraceae; g__unclassified_Lachnospiraceae; s__unclassified_Lachnospiraceae
ASV519	435	422	87	77	k__Bacteria; p__Firmicutes; c__Clostridia; o__Monoglobales; f__Monoglobaceae; g__Monoglobus; s__unclassified_Monoglobus
ASV520	103	0	146	142	k__Bacteria; p__Bacteroidota; c__Bacteroidia; o__Bacteroidales; f__Muribaculaceae; g__unclassified_Muribaculaceae; s__unclassified_Muribaculaceae
ASV522	82	211	163	110	k__Bacteria; p__Firmicutes; c__Clostridia; o__Oscillospirales; f__Ruminococcaceae; g__Paludicola; s__unclassified_Paludicola
ASV523	49	192	143	32	k__Bacteria; p__Firmicutes; c__Clostridia; o__Peptococcales; f__Peptococcaceae; g__Peptococcus; s__unclassified_Peptococcus
ASV524	0	101	88	0	k__Bacteria; p__Firmicutes; c__Clostridia; o__Lachnospirales; f__Lachnospiraceae; g__unclassified_Lachnospiraceae; s__unclassified_Lachnospiraceae
ASV525	38	99	130	95	k__Bacteria; p__Deferribacterota; c__Deferribacteres; o__Deferribacterales; f__Deferribacteraceae; g__Mucispirillum; s__Mucispirillum_sp._69
ASV526	99	27	75	34	k__Bacteria; p__Firmicutes; c__Clostridia; o__Oscillospirales; f__Oscillospiraceae; g__Oscillibacter; s__unclassified_Oscillibacter
ASV527	0	0	182	95	k__Bacteria; p__Firmicutes; c__Clostridia; o__Lachnospirales; f__Lachnospiraceae; g__unclassified_Lachnospiraceae; s__unclassified_Lachnospiraceae
ASV528	492	0	0	0	k__Bacteria; p__Bacteroidota; c__Bacteroidia; o__Bacteroidales; f__Muribaculaceae; g__Muribaculum; s__unclassified_Muribaculum
ASV529	82	47	14	41	k__Bacteria; p__Firmicutes; c__Clostridia; o__Oscillospirales; f__Oscillospiraceae; g__unclassified_Oscillospiraceae; s__unclassified_Oscillospiraceae
ASV531	0	0	0	155	k__Bacteria; p__Firmicutes; c__Clostridia; o__Lachnospirales; f__Lachnospiraceae; g__unclassified_Lachnospiraceae; s__unclassified_Lachnospiraceae
ASV532	0	16	170	0	k__Bacteria; p__Firmicutes; c__Clostridia; o__Lachnospirales; f__Lachnospiraceae; g__unclassified_Lachnospiraceae; s__unclassified_Lachnospiraceae
ASV533	0	0	22	32	k__Bacteria; p__Bacteroidota; c__Bacteroidia; o__Bacteroidales; f__Muribaculaceae; g__unclassified_Muribaculaceae; s__unclassified_Muribaculaceae
ASV534	69	503	33	0	k__Bacteria; p__Firmicutes; c__Clostridia; o__Lachnospirales; f__Lachnospiraceae; g__unclassified_Lachnospiraceae; s__unclassified_Lachnospiraceae
ASV535	155	135	0	0	k__Bacteria; p__Bacteroidota; c__Bacteroidia; o__Bacteroidales; f__Muribaculaceae; g__unclassified_Muribaculaceae; s__unclassified_Muribaculaceae
ASV536	479	0	6	63	k__Bacteria; p__Firmicutes; c__Bacilli; o__Lactobacillales; f__Aerococcaceae; g__Facklamia; s__unclassified_Facklamia
ASV537	0	89	0	0	k__Bacteria; p__Bacteroidota; c__Bacteroidia; o__Bacteroidales; f__Muribaculaceae; g__unclassified_Muribaculaceae; s__unclassified_Muribaculaceae
ASV539	0	0	216	119	k__Bacteria; p__Bacteroidota; c__Bacteroidia; o__Bacteroidales; f__Muribaculaceae; g__unclassified_Muribaculaceae; s__unclassified_Muribaculaceae
ASV541	0	0	183	0	k__Bacteria; p__Bacteroidota; c__Bacteroidia; o__Bacteroidales; f__Muribaculaceae; g__unclassified_Muribaculaceae; s__unclassified_Muribaculaceae
ASV542	11	121	14	16	k__Bacteria; p__Firmicutes; c__Clostridia; o__Lachnospirales; f__Lachnospiraceae; g__unclassified_Lachnospiraceae; s__unclassified_Lachnospiraceae
ASV543	233	609	324	105	k__Bacteria; p__Firmicutes; c__Clostridia; o__Lachnospirales; f__Lachnospiraceae; g__unclassified_Lachnospiraceae; s__unclassified_Lachnospiraceae
ASV544	144	147	0	111	k__Bacteria; p__Firmicutes; c__Clostridia; o__Lachnospirales; f__Lachnospiraceae; g__GCA_900066575; s__unclassified_GCA_900066575
ASV545	196	5	179	8	k__Bacteria; p__Bacteroidota; c__Bacteroidia; o__Bacteroidales; f__Bacteroidaceae; g__Bacteroides; s__Bacteroides_caecimuris
ASV546	50	271	106	21	k__Bacteria; p__Firmicutes; c__Clostridia; o__Oscillospirales; f__Ruminococcaceae; g__unclassified_Ruminococcaceae; s__unclassified_Ruminococcaceae
ASV547	0	0	0	89	k__Bacteria; p__Firmicutes; c__Clostridia; o__Peptostreptococcales_Tissierellales; f__Anaerovoracaceae; g__[Eubacterium]_nodatum_group; s__unclassified_[Eubacterium]_nodatum_group
ASV548	31	124	42	134	k__Bacteria; p__Firmicutes; c__Clostridia; o__Christensenellales; f__Christensenellaceae; g__unclassified_Christensenellaceae; s__unclassified_Christensenellaceae
ASV549	0	46	0	52	k__Bacteria; p__Bacteroidota; c__Bacteroidia; o__Bacteroidales; f__Muribaculaceae; g__unclassified_Muribaculaceae; s__unclassified_Muribaculaceae
ASV550	0	30	31	107	k__Bacteria; p__Firmicutes; c__Bacilli; o__Erysipelotrichales; f__Erysipelatoclostridiaceae; g__Candidatus_Stoquefichus; s__unclassified_Candidatus_Stoquefichus
ASV551	14	104	115	106	k__Bacteria; p__Firmicutes; c__Clostridia; o__Lachnospirales; f__Lachnospiraceae; g__unclassified_Lachnospiraceae; s__unclassified_Lachnospiraceae
ASV552	89	0	24	0	k__Bacteria; p__Firmicutes; c__Clostridia; o__Clostridia_UCG_014; f__unclassified_Clostridia_UCG_014; g__unclassified_Clostridia_UCG_014; s__unclassified_Clostridia_UCG_014
ASV553	150	136	201	84	k__Bacteria; p__Firmicutes; c__Clostridia; o__Oscillospirales; f__Oscillospiraceae; g__Colidextribacter; s__unclassified_Colidextribacter
ASV554	0	0	15	0	k__Bacteria; p__Firmicutes; c__Bacilli; o__Staphylococcales; f__Staphylococcaceae; g__Staphylococcus; s__unclassified_Staphylococcus
ASV555	0	46	9	0	k__Bacteria; p__Firmicutes; c__Clostridia; o__Lachnospirales; f__Lachnospiraceae; g__unclassified_Lachnospiraceae; s__unclassified_Lachnospiraceae
ASV557	109	12	111	0	k__Bacteria; p__Bacteroidota; c__Bacteroidia; o__Bacteroidales; f__Tannerellaceae; g__Parabacteroides; s__unclassified_Parabacteroides
ASV558	697	24	13	33	k__Bacteria; p__Proteobacteria; c__Alphaproteobacteria; o__Rhodospirillales; f__unclassified_Rhodospirillales; g__uncultured_rumen_bacterium; s__unclassified_Rhodospirillales
ASV559	121	55	122	0	k__Bacteria; p__Bacteroidota; c__Bacteroidia; o__Bacteroidales; f__Tannerellaceae; g__Parabacteroides; s__Parabacteroides_goldsteinii
ASV560	75	38	0	52	k__Bacteria; p__Firmicutes; c__Clostridia; o__Oscillospirales; f__Oscillospiraceae; g__unclassified_Oscillospiraceae; s__unclassified_Oscillospiraceae
ASV561	61	85	71	111	k__Bacteria; p__Actinobacteriota; c__Coriobacteriia; o__Coriobacteriales; f__Eggerthellaceae; g__Enterorhabdus; s__unclassified_Enterorhabdus
ASV562	310	183	0	0	k__Bacteria; p__Bacteroidota; c__Bacteroidia; o__Bacteroidales; f__Tannerellaceae; g__Parabacteroides; s__unclassified_Parabacteroides
ASV563	0	0	4	0	k__Bacteria; p__Firmicutes; c__Clostridia; o__Lachnospirales; f__Lachnospiraceae; g__Lachnospiraceae_NK4A136_group; s__unclassified_Lachnospiraceae_NK4A136_group
ASV564	0	0	0	52	k__Bacteria; p__Cyanobacteria; c__Vampirivibrionia; o__Gastranaerophilales; f__unclassified_Gastranaerophilales; g__unclassified_Gastranaerophilales; s__unclassified_Gastranaerophilales
ASV565	114	0	0	482	k__Bacteria; p__Firmicutes; c__Clostridia; o__Clostridia_UCG_014; f__unclassified_Clostridia_UCG_014; g__unclassified_Clostridia_UCG_014; s__unclassified_Clostridia_UCG_014
ASV566	3	38	9	34	k__Bacteria; p__Firmicutes; c__Clostridia; o__Oscillospirales; f__Oscillospiraceae; g__unclassified_Oscillospiraceae; s__unclassified_Oscillospiraceae
ASV567	0	210	0	421	k__Bacteria; p__Firmicutes; c__Clostridia; o__Clostridia_UCG_014; f__unclassified_Clostridia_UCG_014; g__unclassified_Clostridia_UCG_014; s__unclassified_Clostridia_UCG_014
ASV568	0	110	46	188	k__Bacteria; p__Firmicutes; c__Clostridia; o__Oscillospirales; f__Oscillospiraceae; g__unclassified_Oscillospiraceae; s__unclassified_Oscillospiraceae
ASV569	193	0	133	0	k__Bacteria; p__Bacteroidota; c__Bacteroidia; o__Bacteroidales; f__Muribaculaceae; g__unclassified_Muribaculaceae; s__unclassified_Muribaculaceae
ASV572	0	19	1072	0	k__Bacteria; p__Firmicutes; c__Clostridia; o__Lachnospirales; f__Lachnospiraceae; g__unclassified_Lachnospiraceae; s__unclassified_Lachnospiraceae
ASV573	0	127	8	149	k__Bacteria; p__Firmicutes; c__Clostridia; o__Lachnospirales; f__Lachnospiraceae; g__unclassified_Lachnospiraceae; s__unclassified_Lachnospiraceae
ASV575	0	5	117	97	k__Bacteria; p__Bacteroidota; c__Bacteroidia; o__Bacteroidales; f__Bacteroidaceae; g__Bacteroides; s__Bacteroides_caecimuris
ASV576	0	0	0	158	k__Bacteria; p__Bacteroidota; c__Bacteroidia; o__Bacteroidales; f__Rikenellaceae; g__Rikenella_sp._Marseille_P3215; s__unclassified_Rikenella_sp._Marseille_P3215
ASV577	0	299	282	0	k__Bacteria; p__Firmicutes; c__Clostridia; o__Lachnospirales; f__Lachnospiraceae; g__Roseburia; s__unclassified_Roseburia
ASV578	0	57	0	0	k__Bacteria; p__Proteobacteria; c__Gammaproteobacteria; o__Enterobacterales; f__Enterobacteriaceae; g__Klebsiella; s__unclassified_Klebsiella
ASV579	0	60	114	133	k__Bacteria; p__Firmicutes; c__Clostridia; o__Clostridia_UCG_014; f__unclassified_Clostridia_UCG_014; g__unclassified_Clostridia_UCG_014; s__unclassified_Clostridia_UCG_014
ASV581	19	0	134	224	k__Bacteria; p__Firmicutes; c__Clostridia; o__Oscillospirales; f__Oscillospiraceae; g__unclassified_Oscillospiraceae; s__unclassified_Oscillospiraceae
ASV582	0	9	169	0	k__Bacteria; p__Firmicutes; c__Clostridia; o__Lachnospirales; f__Lachnospiraceae; g__Blautia; s__unclassified_Blautia
ASV583	63	0	457	0	k__Bacteria; p__Firmicutes; c__Clostridia; o__Oscillospirales; f__Oscillospiraceae; g__Colidextribacter; s__unclassified_Colidextribacter
ASV584	88	195	51	0	k__Bacteria; p__Firmicutes; c__Clostridia; o__Peptococcales; f__Peptococcaceae; g__unclassified_Peptococcaceae; s__unclassified_Peptococcaceae
ASV585	0	65	0	66	k__Bacteria; p__Firmicutes; c__Bacilli; o__Erysipelotrichales; f__Erysipelotrichaceae; g__unclassified_Erysipelotrichaceae; s__unclassified_Erysipelotrichaceae
ASV586	0	0	128	0	k__Bacteria; p__Bacteroidota; c__Bacteroidia; o__Bacteroidales; f__Muribaculaceae; g__unclassified_Muribaculaceae; s__unclassified_Muribaculaceae
ASV587	0	117	25	79	k__Bacteria; p__Firmicutes; c__Clostridia; o__Lachnospirales; f__Lachnospiraceae; g__unclassified_Lachnospiraceae; s__unclassified_Lachnospiraceae
ASV589	15	95	19	0	k__Bacteria; p__Firmicutes; c__Clostridia; o__Lachnospirales; f__Lachnospiraceae; g__unclassified_Lachnospiraceae; s__unclassified_Lachnospiraceae
ASV590	0	37	166	0	k__Bacteria; p__Bacteroidota; c__Bacteroidia; o__Bacteroidales; f__Rikenellaceae; g__Alistipes; s__unclassified_Alistipes
ASV591	689	0	0	609	k__Bacteria; p__Firmicutes; c__Clostridia; o__Oscillospirales; f__Oscillospiraceae; g__unclassified_Oscillospiraceae; s__unclassified_Oscillospiraceae
ASV592	121	10	0	29	k__Bacteria; p__Bacteroidota; c__Bacteroidia; o__Bacteroidales; f__Rikenellaceae; g__Alistipes; s__Alistipes_inops
ASV593	15	336	15	201	k__Bacteria; p__Firmicutes; c__Clostridia; o__Monoglobales; f__Monoglobaceae; g__Monoglobus; s__uncultured_Clostridium_sp.
ASV594	135	177	60	45	k__Bacteria; p__Firmicutes; c__Clostridia; o__Lachnospirales; f__Lachnospiraceae; g__GCA_900066575; s__unclassified_GCA_900066575
ASV595	0	137	82	4	k__Bacteria; p__Firmicutes; c__Clostridia; o__Oscillospirales; f__Oscillospiraceae; g__unclassified_Oscillospiraceae; s__unclassified_Oscillospiraceae
ASV596	42	85	69	149	k__Bacteria; p__Firmicutes; c__Clostridia; o__Oscillospirales; f__Oscillospiraceae; g__unclassified_Oscillospiraceae; s__unclassified_Oscillospiraceae
ASV597	69	187	35	74	k__Bacteria; p__Firmicutes; c__Clostridia; o__Peptostreptococcales_Tissierellales; f__Anaerovoracaceae; g__Family_XIII_AD3011_group; s__unclassified_Family_XIII_AD3011_group
ASV598	106	0	0	0	k__Bacteria; p__Firmicutes; c__Clostridia; o__Clostridia_UCG_014; f__unclassified_Clostridia_UCG_014; g__unclassified_Clostridia_UCG_014; s__unclassified_Clostridia_UCG_014
ASV599	94	279	128	90	k__Bacteria; p__Firmicutes; c__Clostridia; o__Clostridia_UCG_014; f__unclassified_Clostridia_UCG_014; g__unclassified_Clostridia_UCG_014; s__unclassified_Clostridia_UCG_014
ASV600	0	312	0	0	k__Bacteria; p__Bacteroidota; c__Bacteroidia; o__Bacteroidales; f__Rikenellaceae; g__Alistipes; s__unclassified_Alistipes
ASV601	0	23	0	20	k__Bacteria; p__Firmicutes; c__Clostridia; o__Lachnospirales; f__Lachnospiraceae; g__unclassified_Lachnospiraceae; s__unclassified_Lachnospiraceae
ASV602	0	84	132	0	k__Bacteria; p__Bacteroidota; c__Bacteroidia; o__Bacteroidales; f__Marinifilaceae; g__Odoribacter; s__unclassified_Odoribacter
ASV603	149	22	87	101	k__Bacteria; p__Bacteroidota; c__Bacteroidia; o__Bacteroidales; f__Muribaculaceae; g__unclassified_Muribaculaceae; s__unclassified_Muribaculaceae
ASV604	0	0	0	196	k__Bacteria; p__Bacteroidota; c__Bacteroidia; o__Bacteroidales; f__Muribaculaceae; g__unclassified_Muribaculaceae; s__unclassified_Muribaculaceae
ASV605	0	345	170	0	k__Bacteria; p__Firmicutes; c__Clostridia; o__Lachnospirales; f__Lachnospiraceae; g__unclassified_Lachnospiraceae; s__unclassified_Lachnospiraceae
ASV606	17	0	39	0	k__Bacteria; p__Firmicutes; c__Clostridia; o__Lachnospirales; f__Lachnospiraceae; g__Blautia; s__unclassified_Blautia
ASV608	47	132	52	95	k__Bacteria; p__Firmicutes; c__Clostridia; o__Oscillospirales; f__Hungateiclostridiaceae; g__unclassified_Hungateiclostridiaceae; s__unclassified_Hungateiclostridiaceae
ASV609	0	0	87	65	k__Bacteria; p__Bacteroidota; c__Bacteroidia; o__Bacteroidales; f__Muribaculaceae; g__unclassified_Muribaculaceae; s__unclassified_Muribaculaceae
ASV610	0	39	0	0	k__Bacteria; p__Bacteroidota; c__Bacteroidia; o__Bacteroidales; f__Muribaculaceae; g__unclassified_Muribaculaceae; s__unclassified_Muribaculaceae
ASV611	355	0	3	4	k__Bacteria; p__Proteobacteria; c__Gammaproteobacteria; o__Burkholderiales; f__Alcaligenaceae; g__Oligella; s__Oligella_ureolytica
ASV613	0	0	83	0	k__Bacteria; p__Firmicutes; c__Clostridia; o__Lachnospirales; f__Lachnospiraceae; g__Lachnospiraceae_NK4A136_group; s__uncultured_Clostridiales_bacterium
ASV614	14	0	87	63	k__Bacteria; p__Firmicutes; c__Clostridia; o__Lachnospirales; f__Lachnospiraceae; g__unclassified_Lachnospiraceae; s__unclassified_Lachnospiraceae
ASV615	0	0	57	121	k__Bacteria; p__Firmicutes; c__Bacilli; o__Erysipelotrichales; f__Erysipelatoclostridiaceae; g__Erysipelatoclostridium; s__unclassified_Erysipelatoclostridium
ASV616	12	6	5	156	k__Bacteria; p__Firmicutes; c__Bacilli; o__Erysipelotrichales; f__Erysipelotrichaceae; g__unclassified_Erysipelotrichaceae; s__unclassified_Erysipelotrichaceae
ASV618	0	110	14	97	k__Bacteria; p__Firmicutes; c__Clostridia; o__Oscillospirales; f__Oscillospiraceae; g__unclassified_Oscillospiraceae; s__unclassified_Oscillospiraceae
ASV619	0	0	118	0	k__Bacteria; p__Firmicutes; c__Clostridia; o__Lachnospirales; f__Lachnospiraceae; g__Lachnoclostridium; s__Dorea_sp._5_2
ASV620	0	262	0	459	k__Bacteria; p__Bacteroidota; c__Bacteroidia; o__Bacteroidales; f__Muribaculaceae; g__uncultured_Barnesiella_sp.; s__uncultured_Barnesiella_sp.
ASV621	94	48	325	20	k__Bacteria; p__Firmicutes; c__Clostridia; o__Oscillospirales; f__Oscillospiraceae; g__unclassified_Oscillospiraceae; s__unclassified_Oscillospiraceae
ASV623	147	121	100	76	k__Bacteria; p__Firmicutes; c__Clostridia; o__Christensenellales; f__Christensenellaceae; g__Christensenellaceae_R_7_group; s__uncultured_prokaryote
ASV625	0	279	47	16	k__Bacteria; p__Firmicutes; c__Clostridia; o__Lachnospirales; f__Lachnospiraceae; g__unclassified_Lachnospiraceae; s__unclassified_Lachnospiraceae
ASV626	84	19	33	0	k__Bacteria; p__Proteobacteria; c__Alphaproteobacteria; o__Rhodospirillales; f__unclassified_Rhodospirillales; g__unclassified_Rhodospirillales; s__unclassified_Rhodospirillales
ASV627	0	105	149	73	k__Bacteria; p__Firmicutes; c__Clostridia; o__Clostridia_UCG_014; f__unclassified_Clostridia_UCG_014; g__unclassified_Clostridia_UCG_014; s__unclassified_Clostridia_UCG_014
ASV629	0	234	0	33	k__Bacteria; p__Firmicutes; c__Clostridia; o__Lachnospirales; f__Lachnospiraceae; g__unclassified_Lachnospiraceae; s__unclassified_Lachnospiraceae
ASV630	0	129	90	0	k__Bacteria; p__Firmicutes; c__Clostridia; o__Oscillospirales; f__Ruminococcaceae; g__Incertae_Sedis; s__unclassified_Incertae_Sedis
ASV631	99	122	83	72	k__Bacteria; p__Firmicutes; c__Clostridia; o__Peptostreptococcales_Tissierellales; f__Anaerovoracaceae; g__unclassified_Anaerovoracaceae; s__unclassified_Anaerovoracaceae
ASV632	9	38	72	0	k__Bacteria; p__Firmicutes; c__Clostridia; o__Lachnospirales; f__Lachnospiraceae; g__unclassified_Lachnospiraceae; s__unclassified_Lachnospiraceae
ASV633	0	10	3	0	Unassigned; Unassigned; Unassigned; Unassigned; Unassigned; Unassigned; Unassigned
ASV634	0	174	119	0	k__Bacteria; p__Firmicutes; c__Clostridia; o__Lachnospirales; f__Lachnospiraceae; g__Lachnospiraceae_NK4A136_group; s__Lachnospiraceae_bacterium_COE1
ASV636	9	44	21	28	k__Bacteria; p__Firmicutes; c__Clostridia; o__Peptostreptococcales_Tissierellales; f__Anaerovoracaceae; g__unclassified_Anaerovoracaceae; s__unclassified_Anaerovoracaceae
ASV637	7	29	101	37	k__Bacteria; p__Firmicutes; c__Clostridia; o__Oscillospirales; f__Ruminococcaceae; g__unclassified_Ruminococcaceae; s__unclassified_Ruminococcaceae
ASV638	0	0	0	48	k__Bacteria; p__Bacteroidota; c__Bacteroidia; o__Bacteroidales; f__Bacteroidaceae; g__Bacteroides; s__unclassified_Bacteroides
ASV639	74	132	25	110	k__Bacteria; p__Firmicutes; c__Clostridia; o__Oscillospirales; f__Oscillospiraceae; g__UCG_007; s__unclassified_UCG_007
ASV640	294	26	7	49	k__Bacteria; p__Firmicutes; c__Bacilli; o__Staphylococcales; f__Staphylococcaceae; g__Jeotgalicoccus; s__unclassified_Jeotgalicoccus
ASV641	0	247	0	0	k__Bacteria; p__Firmicutes; c__Bacilli; o__Lactobacillales; f__Lactobacillaceae; g__Lactobacillus; s__unclassified_Lactobacillus
ASV642	26	31	224	0	k__Bacteria; p__Desulfobacterota; c__Desulfovibrionia; o__Desulfovibrionales; f__Desulfovibrionaceae; g__unclassified_Desulfovibrionaceae; s__uncultured_Desulfovibrionaceae_bacterium
ASV643	189	0	0	66	k__Bacteria; p__Actinobacteriota; c__Actinobacteria; o__Corynebacteriales; f__Corynebacteriaceae; g__Corynebacterium; s__Corynebacterium_stationis
ASV644	0	156	0	0	k__Bacteria; p__Bacteroidota; c__Bacteroidia; o__Bacteroidales; f__Muribaculaceae; g__Muribaculum; s__unclassified_Muribaculum
ASV645	0	79	0	86	k__Bacteria; p__Firmicutes; c__Clostridia; o__Peptococcales; f__Peptococcaceae; g__unclassified_Peptococcaceae; s__unclassified_Peptococcaceae
ASV646	0	0	0	32	k__Bacteria; p__Bacteroidota; c__Bacteroidia; o__unclassified_Bacteroidia; f__unclassified_Bacteroidia; g__unclassified_Bacteroidia; s__unclassified_Bacteroidia
ASV647	0	0	118	0	k__Bacteria; p__Bacteroidota; c__Bacteroidia; o__Bacteroidales; f__Muribaculaceae; g__uncultured_Bacteroidales_bacterium; s__uncultured_Bacteroidales_bacterium
ASV648	0	16	0	0	k__Bacteria; p__Patescibacteria; c__Saccharimonadia; o__Saccharimonadales; f__Saccharimonadaceae; g__Candidatus_Saccharimonas; s__unclassified_Candidatus_Saccharimonas
ASV651	0	82	304	0	k__Bacteria; p__Firmicutes; c__Clostridia; o__Oscillospirales; f__Oscillospiraceae; g__Oscillibacter; s__unclassified_Oscillibacter
ASV652	0	4	26	0	k__Bacteria; p__Firmicutes; c__Bacilli; o__Lactobacillales; f__Streptococcaceae; g__Streptococcus; s__unclassified_Streptococcus
ASV653	0	77	75	0	k__Bacteria; p__Bacteroidota; c__Bacteroidia; o__Bacteroidales; f__Muribaculaceae; g__unclassified_Muribaculaceae; s__unclassified_Muribaculaceae
ASV654	0	170	485	0	k__Bacteria; p__Bacteroidota; c__Bacteroidia; o__Bacteroidales; f__Tannerellaceae; g__Parabacteroides; s__Parabacteroides_johnsonii
ASV655	307	218	27	0	k__Bacteria; p__Firmicutes; c__Clostridia; o__Oscillospirales; f__Ruminococcaceae; g__unclassified_Ruminococcaceae; s__unclassified_Ruminococcaceae
ASV656	0	159	0	6	k__Bacteria; p__Firmicutes; c__Clostridia; o__Lachnospirales; f__Lachnospiraceae; g__ASF356; s__unclassified_ASF356
ASV657	87	89	187	59	k__Bacteria; p__Firmicutes; c__Clostridia; o__Oscillospirales; f__Ruminococcaceae; g__unclassified_Ruminococcaceae; s__unclassified_Ruminococcaceae
ASV658	281	58	86	0	k__Bacteria; p__Cyanobacteria; c__Vampirivibrionia; o__Gastranaerophilales; f__unclassified_Gastranaerophilales; g__unclassified_Gastranaerophilales; s__unclassified_Gastranaerophilales
ASV659	0	0	0	43	k__Bacteria; p__Firmicutes; c__Clostridia; o__Lachnospirales; f__Lachnospiraceae; g__unclassified_Lachnospiraceae; s__unclassified_Lachnospiraceae
ASV660	66	66	41	75	k__Bacteria; p__Firmicutes; c__Clostridia; o__Oscillospirales; f__Ruminococcaceae; g__Candidatus_Soleaferrea; s__Ruminococcaceae_bacterium_GD6
ASV661	0	0	0	105	k__Bacteria; p__Bacteroidota; c__Bacteroidia; o__Bacteroidales; f__Rikenellaceae; g__Alistipes; s__unclassified_Alistipes
ASV662	274	0	21	0	k__Bacteria; p__Firmicutes; c__Clostridia; o__Lachnospirales; f__Lachnospiraceae; g__unclassified_Lachnospiraceae; s__unclassified_Lachnospiraceae
ASV663	0	0	0	107	k__Bacteria; p__Bacteroidota; c__Bacteroidia; o__Bacteroidales; f__Muribaculaceae; g__unclassified_Muribaculaceae; s__unclassified_Muribaculaceae
ASV664	0	115	178	0	k__Bacteria; p__Bacteroidota; c__Bacteroidia; o__Bacteroidales; f__Tannerellaceae; g__Parabacteroides; s__unclassified_Parabacteroides
ASV665	0	0	0	88	k__Bacteria; p__Bacteroidota; c__Bacteroidia; o__Bacteroidales; f__Muribaculaceae; g__unclassified_Muribaculaceae; s__unclassified_Muribaculaceae
ASV666	0	144	0	37	k__Bacteria; p__Firmicutes; c__Clostridia; o__Oscillospirales; f__Ruminococcaceae; g__Incertae_Sedis; s__unclassified_Incertae_Sedis
ASV667	0	24	67	0	k__Bacteria; p__Bacteroidota; c__Bacteroidia; o__Bacteroidales; f__Muribaculaceae; g__unclassified_Muribaculaceae; s__unclassified_Muribaculaceae
ASV669	0	0	0	19	k__Bacteria; p__Firmicutes; c__Clostridia; o__Lachnospirales; f__Lachnospiraceae; g__unclassified_Lachnospiraceae; s__unclassified_Lachnospiraceae
ASV670	0	0	0	29	k__Bacteria; p__Bacteroidota; c__Bacteroidia; o__Bacteroidales; f__Rikenellaceae; g__Alistipes; s__Bacteroides_sp._DSM_12148
ASV671	0	30	93	0	k__Bacteria; p__Bacteroidota; c__Bacteroidia; o__Bacteroidales; f__Muribaculaceae; g__unclassified_Muribaculaceae; s__unclassified_Muribaculaceae
ASV672	89	322	143	0	k__Bacteria; p__Firmicutes; c__Clostridia; o__Lachnospirales; f__Lachnospiraceae; g__unclassified_Lachnospiraceae; s__unclassified_Lachnospiraceae
ASV674	0	20	0	0	k__Bacteria; p__Firmicutes; c__Clostridia; o__Lachnospirales; f__Lachnospiraceae; g__Roseburia; s__unclassified_Roseburia
ASV675	0	0	79	0	k__Bacteria; p__Firmicutes; c__Clostridia; o__Lachnospirales; f__Lachnospiraceae; g__unclassified_Lachnospiraceae; s__unclassified_Lachnospiraceae
ASV678	0	172	0	0	k__Bacteria; p__Firmicutes; c__Clostridia; o__Lachnospirales; f__Lachnospiraceae; g__unclassified_Lachnospiraceae; s__unclassified_Lachnospiraceae
ASV679	50	35	0	74	k__Bacteria; p__Firmicutes; c__Clostridia; o__Oscillospirales; f__Oscillospiraceae; g__unclassified_Oscillospiraceae; s__unclassified_Oscillospiraceae
ASV680	0	71	1	0	k__Bacteria; p__Firmicutes; c__Bacilli; o__Erysipelotrichales; f__Erysipelatoclostridiaceae; g__Erysipelotrichaceae_UCG_003; s__unclassified_Erysipelotrichaceae_UCG_003
ASV681	26	110	20	9	k__Bacteria; p__Firmicutes; c__Clostridia; o__Lachnospirales; f__Lachnospiraceae; g__GCA_900066575; s__unclassified_GCA_900066575
ASV682	427	0	49	0	k__Bacteria; p__Firmicutes; c__Clostridia; o__Clostridia_UCG_014; f__unclassified_Clostridia_UCG_014; g__unclassified_Clostridia_UCG_014; s__unclassified_Clostridia_UCG_014
ASV683	0	0	82	287	k__Bacteria; p__Firmicutes; c__Clostridia; o__Clostridia_UCG_014; f__unclassified_Clostridia_UCG_014; g__unclassified_Clostridia_UCG_014; s__unclassified_Clostridia_UCG_014
ASV684	81	165	57	0	k__Bacteria; p__Bacteroidota; c__Bacteroidia; o__Bacteroidales; f__Muribaculaceae; g__unclassified_Muribaculaceae; s__unclassified_Muribaculaceae
ASV685	0	31	86	124	k__Bacteria; p__Actinobacteriota; c__Coriobacteriia; o__Coriobacteriales; f__Eggerthellaceae; g__Enterorhabdus; s__unclassified_Enterorhabdus
ASV686	90	152	396	0	k__Bacteria; p__Bacteroidota; c__Bacteroidia; o__Bacteroidales; f__Muribaculaceae; g__unclassified_Muribaculaceae; s__unclassified_Muribaculaceae
ASV687	35	151	335	0	k__Bacteria; p__Bacteroidota; c__Bacteroidia; o__Bacteroidales; f__Rikenellaceae; g__Alistipes; s__Alistipes_sp._cv1
ASV688	0	23	1	131	k__Bacteria; p__Actinobacteriota; c__Actinobacteria; o__Micrococcales; f__Dermabacteraceae; g__Brachybacterium; s__unclassified_Brachybacterium
ASV689	76	0	232	0	k__Bacteria; p__Bacteroidota; c__Bacteroidia; o__Bacteroidales; f__Muribaculaceae; g__unclassified_Muribaculaceae; s__unclassified_Muribaculaceae
ASV690	26	19	139	0	k__Bacteria; p__Firmicutes; c__Clostridia; o__Oscillospirales; f__Oscillospiraceae; g__Flavonifractor; s__unclassified_Flavonifractor
ASV691	18	0	7	0	k__Bacteria; p__Firmicutes; c__Clostridia; o__Lachnospirales; f__Lachnospiraceae; g__unclassified_Lachnospiraceae; s__unclassified_Lachnospiraceae
ASV692	63	0	0	0	k__Bacteria; p__Firmicutes; c__Clostridia; o__Clostridia_UCG_014; f__unclassified_Clostridia_UCG_014; g__unclassified_Clostridia_UCG_014; s__unclassified_Clostridia_UCG_014
ASV693	65	0	0	47	k__Bacteria; p__Firmicutes; c__Clostridia; o__Oscillospirales; f__Oscillospiraceae; g__unclassified_Oscillospiraceae; s__unclassified_Oscillospiraceae
ASV696	0	0	0	141	k__Bacteria; p__Firmicutes; c__Clostridia; o__Lachnospirales; f__Lachnospiraceae; g__ASF356; s__unclassified_ASF356
ASV697	170	0	0	310	k__Bacteria; p__Firmicutes; c__Clostridia; o__Oscillospirales; f__UCG_010; g__unclassified_UCG_010; s__unclassified_UCG_010
ASV698	161	16	256	7	k__Bacteria; p__Firmicutes; c__Clostridia; o__Lachnospirales; f__Lachnospiraceae; g__unclassified_Lachnospiraceae; s__unclassified_Lachnospiraceae
ASV700	0	86	40	0	k__Bacteria; p__Firmicutes; c__Bacilli; o__Erysipelotrichales; f__Erysipelotrichaceae; g__Dubosiella; s__unclassified_Dubosiella
ASV701	0	222	0	30	k__Bacteria; p__Firmicutes; c__Clostridia; o__Clostridia_UCG_014; f__unclassified_Clostridia_UCG_014; g__unclassified_Clostridia_UCG_014; s__unclassified_Clostridia_UCG_014
ASV702	16	149	92	0	k__Bacteria; p__Firmicutes; c__Clostridia; o__Oscillospirales; f__Ruminococcaceae; g__Incertae_Sedis; s__uncultured_Clostridiales_bacterium
ASV703	0	0	0	50	k__Bacteria; p__Actinobacteriota; c__Coriobacteriia; o__Coriobacteriales; f__Eggerthellaceae; g__Enterorhabdus; s__unclassified_Enterorhabdus
ASV705	0	137	160	17	k__Bacteria; p__Bacteroidota; c__Bacteroidia; o__Bacteroidales; f__Muribaculaceae; g__unclassified_Muribaculaceae; s__unclassified_Muribaculaceae
ASV706	29	0	166	25	k__Bacteria; p__Bacteroidota; c__Bacteroidia; o__Bacteroidales; f__Muribaculaceae; g__unclassified_Muribaculaceae; s__unclassified_Muribaculaceae
ASV707	0	78	0	96	k__Bacteria; p__Firmicutes; c__Clostridia; o__Lachnospirales; f__Lachnospiraceae; g__unclassified_Lachnospiraceae; s__unclassified_Lachnospiraceae
ASV708	60	102	0	114	k__Bacteria; p__Firmicutes; c__Clostridia; o__Christensenellales; f__Christensenellaceae; g__Christensenellaceae_R_7_group; s__unclassified_Christensenellaceae_R_7_group
ASV709	0	24	2	33	k__Bacteria; p__Firmicutes; c__Bacilli; o__Erysipelotrichales; f__Erysipelotrichaceae; g__unclassified_Erysipelotrichaceae; s__unclassified_Erysipelotrichaceae
ASV710	0	0	4	0	k__Bacteria; p__Proteobacteria; c__Gammaproteobacteria; o__Enterobacterales; f__Enterobacteriaceae; g__unclassified_Enterobacteriaceae; s__unclassified_Enterobacteriaceae
ASV711	0	212	62	22	k__Bacteria; p__Bacteroidota; c__Bacteroidia; o__Bacteroidales; f__Muribaculaceae; g__uncultured_Bacteroidales_bacterium; s__uncultured_Bacteroidales_bacterium
ASV712	26	91	143	6	k__Bacteria; p__Firmicutes; c__Clostridia; o__Oscillospirales; f__Butyricicoccaceae; g__UCG_009; s__[Clostridium]_leptum
ASV714	25	0	224	214	k__Bacteria; p__Actinobacteriota; c__Actinobacteria; o__Bifidobacteriales; f__Bifidobacteriaceae; g__Bifidobacterium; s__unclassified_Bifidobacterium
ASV715	0	0	0	409	k__Bacteria; p__Firmicutes; c__Clostridia; o__Oscillospirales; f__Ruminococcaceae; g__Incertae_Sedis; s__unclassified_Incertae_Sedis
ASV717	0	0	25	411	k__Bacteria; p__Firmicutes; c__Clostridia; o__Clostridia_UCG_014; f__unclassified_Clostridia_UCG_014; g__unclassified_Clostridia_UCG_014; s__unclassified_Clostridia_UCG_014
ASV718	0	0	0	24	k__Bacteria; p__Firmicutes; c__Clostridia; o__Lachnospirales; f__Lachnospiraceae; g__Blautia; s__unclassified_Blautia
ASV720	49	0	49	0	k__Bacteria; p__Firmicutes; c__Bacilli; o__Erysipelotrichales; f__Erysipelatoclostridiaceae; g__Erysipelatoclostridium; s__[Clostridium]_saccharogumia
ASV721	0	0	0	61	k__Bacteria; p__Firmicutes; c__Clostridia; o__Lachnospirales; f__Lachnospiraceae; g__unclassified_Lachnospiraceae; s__unclassified_Lachnospiraceae
ASV722	0	0	140	24	k__Bacteria; p__Firmicutes; c__Clostridia; o__Oscillospirales; f__Oscillospiraceae; g__unclassified_Oscillospiraceae; s__unclassified_Oscillospiraceae
ASV723	0	0	44	0	k__Bacteria; p__Bacteroidota; c__Bacteroidia; o__Bacteroidales; f__Muribaculaceae; g__unclassified_Muribaculaceae; s__unclassified_Muribaculaceae
ASV724	0	37	0	0	k__Bacteria; p__Firmicutes; c__Clostridia; o__Clostridia_UCG_014; f__unclassified_Clostridia_UCG_014; g__unclassified_Clostridia_UCG_014; s__unclassified_Clostridia_UCG_014
ASV725	0	0	11	0	k__Bacteria; p__Firmicutes; c__Clostridia; o__Oscillospirales; f__Oscillospiraceae; g__Colidextribacter; s__unclassified_Colidextribacter
ASV727	161	0	493	0	k__Bacteria; p__Bacteroidota; c__Bacteroidia; o__Bacteroidales; f__Tannerellaceae; g__Parabacteroides; s__unclassified_Parabacteroides
ASV728	105	0	446	37	k__Bacteria; p__Bacteroidota; c__Bacteroidia; o__Bacteroidales; f__Muribaculaceae; g__unclassified_Muribaculaceae; s__unclassified_Muribaculaceae
ASV729	0	0	0	249	k__Bacteria; p__Firmicutes; c__Clostridia; o__Lachnospirales; f__Lachnospiraceae; g__Lachnospiraceae_NK4A136_group; s__unclassified_Lachnospiraceae_NK4A136_group
ASV730	16	171	0	60	k__Bacteria; p__Firmicutes; c__Clostridia; o__Lachnospirales; f__Lachnospiraceae; g__unclassified_Lachnospiraceae; s__unclassified_Lachnospiraceae
ASV731	39	42	25	111	k__Bacteria; p__Firmicutes; c__Bacilli; o__Erysipelotrichales; f__Erysipelotrichaceae; g__unclassified_Erysipelotrichaceae; s__unclassified_Erysipelotrichaceae
ASV732	0	0	0	39	k__Bacteria; p__Firmicutes; c__Clostridia; o__Lachnospirales; f__Lachnospiraceae; g__Lachnospiraceae_NK4A136_group; s__unclassified_Lachnospiraceae_NK4A136_group
ASV733	113	82	203	103	k__Bacteria; p__Firmicutes; c__Bacilli; o__Erysipelotrichales; f__Erysipelotrichaceae; g__Allobaculum; s__unclassified_Allobaculum
ASV734	122	0	0	152	k__Bacteria; p__Firmicutes; c__Clostridia; o__Clostridia_UCG_014; f__unclassified_Clostridia_UCG_014; g__unclassified_Clostridia_UCG_014; s__unclassified_Clostridia_UCG_014
ASV735	34	55	58	63	k__Bacteria; p__Firmicutes; c__Clostridia; o__Oscillospirales; f__Butyricicoccaceae; g__UCG_009; s__unclassified_UCG_009
ASV738	49	78	0	100	k__Bacteria; p__Bacteroidota; c__Bacteroidia; o__Bacteroidales; f__Muribaculaceae; g__unclassified_Muribaculaceae; s__unclassified_Muribaculaceae
ASV739	150	11	0	81	k__Bacteria; p__Actinobacteriota; c__Actinobacteria; o__Micrococcales; f__Brevibacteriaceae; g__Brevibacterium; s__unclassified_Brevibacterium
ASV741	26	0	97	27	k__Bacteria; p__Firmicutes; c__Clostridia; o__Oscillospirales; f__Oscillospiraceae; g__unclassified_Oscillospiraceae; s__unclassified_Oscillospiraceae
ASV742	0	168	0	37	k__Bacteria; p__Bacteroidota; c__Bacteroidia; o__Bacteroidales; f__Rikenellaceae; g__Alistipes; s__Alistipes_finegoldii
ASV744	0	0	19	51	k__Bacteria; p__Firmicutes; c__Bacilli; o__Erysipelotrichales; f__Erysipelotrichaceae; g__Dubosiella; s__unclassified_Dubosiella
ASV745	71	53	24	0	k__Bacteria; p__Firmicutes; c__Clostridia; o__Oscillospirales; f__Oscillospiraceae; g__Oscillibacter; s__unclassified_Oscillibacter
ASV746	0	0	7	167	k__Bacteria; p__Firmicutes; c__Clostridia; o__Clostridia_vadinBB60_group; f__unclassified_Clostridia_vadinBB60_group; g__unclassified_Clostridia_vadinBB60_group; s__unclassified_Clostridia_vadinBB60_group
ASV747	277	0	0	21	k__Bacteria; p__Firmicutes; c__Clostridia; o__Clostridia_vadinBB60_group; f__unclassified_Clostridia_vadinBB60_group; g__unclassified_Clostridia_vadinBB60_group; s__unclassified_Clostridia_vadinBB60_group
ASV748	0	306	0	23	k__Bacteria; p__Firmicutes; c__Clostridia; o__Lachnospirales; f__Lachnospiraceae; g__unclassified_Lachnospiraceae; s__unclassified_Lachnospiraceae
ASV749	39	17	25	18	k__Bacteria; p__Firmicutes; c__Clostridia; o__Oscillospirales; f__Oscillospiraceae; g__unclassified_Oscillospiraceae; s__unclassified_Oscillospiraceae
ASV750	42	93	37	91	k__Bacteria; p__Firmicutes; c__Clostridia; o__Lachnospirales; f__Defluviitaleaceae; g__Defluviitaleaceae_UCG_011; s__unclassified_Defluviitaleaceae_UCG_011
ASV751	0	0	0	77	k__Bacteria; p__Firmicutes; c__Clostridia; o__Oscillospirales; f__[Eubacterium]_coprostanoligenes_group; g__unclassified_[Eubacterium]_coprostanoligenes_group; s__unclassified_[Eubacterium]_coprostanoligenes_group
ASV752	74	0	0	0	k__Bacteria; p__Firmicutes; c__Clostridia; o__Clostridia_UCG_014; f__unclassified_Clostridia_UCG_014; g__unclassified_Clostridia_UCG_014; s__unclassified_Clostridia_UCG_014
ASV753	0	0	201	0	k__Bacteria; p__Firmicutes; c__Clostridia; o__Lachnospirales; f__Lachnospiraceae; g__unclassified_Lachnospiraceae; s__unclassified_Lachnospiraceae
ASV754	16	19	11	29	k__Bacteria; p__Firmicutes; c__Clostridia; o__Oscillospirales; f__UCG_010; g__uncultured_rumen_bacterium; s__uncultured_rumen_bacterium
ASV755	46	56	11	13	k__Bacteria; p__Firmicutes; c__Clostridia; o__Lachnospirales; f__Lachnospiraceae; g__unclassified_Lachnospiraceae; s__unclassified_Lachnospiraceae
ASV756	0	56	35	75	k__Bacteria; p__Actinobacteriota; c__Coriobacteriia; o__Coriobacteriales; f__Eggerthellaceae; g__unclassified_Eggerthellaceae; s__unclassified_Eggerthellaceae
ASV757	0	64	65	0	k__Bacteria; p__Firmicutes; c__Clostridia; o__Lachnospirales; f__Lachnospiraceae; g__Lachnospiraceae_NK4A136_group; s__unclassified_Lachnospiraceae_NK4A136_group
ASV758	7	0	0	7	k__Bacteria; p__Proteobacteria; c__Gammaproteobacteria; o__Burkholderiales; f__Alcaligenaceae; g__Paenalcaligenes; s__Paenalcaligenes_hominis
ASV759	0	18	37	55	k__Bacteria; p__Bacteroidota; c__Bacteroidia; o__Bacteroidales; f__Muribaculaceae; g__uncultured_Bacteroidales_bacterium; s__uncultured_Bacteroidales_bacterium
ASV761	0	0	166	62	k__Bacteria; p__Bacteroidota; c__Bacteroidia; o__Bacteroidales; f__Muribaculaceae; g__unclassified_Muribaculaceae; s__unclassified_Muribaculaceae
ASV762	29	62	0	54	k__Bacteria; p__Firmicutes; c__Clostridia; o__Lachnospirales; f__Lachnospiraceae; g__Lachnospiraceae_FCS020_group; s__unclassified_Lachnospiraceae_FCS020_group
ASV763	0	0	223	0	k__Bacteria; p__Bacteroidota; c__Bacteroidia; o__Bacteroidales; f__Muribaculaceae; g__unclassified_Muribaculaceae; s__unclassified_Muribaculaceae
ASV765	0	528	33	0	k__Bacteria; p__Firmicutes; c__Clostridia; o__Lachnospirales; f__Lachnospiraceae; g__unclassified_Lachnospiraceae; s__unclassified_Lachnospiraceae
ASV766	41	21	0	0	k__Bacteria; p__Firmicutes; c__Bacilli; o__Erysipelotrichales; f__Erysipelatoclostridiaceae; g__Erysipelatoclostridium; s__[Clostridium]_saccharogumia
ASV767	0	22	59	0	k__Bacteria; p__Actinobacteriota; c__Actinobacteria; o__Corynebacteriales; f__Corynebacteriaceae; g__Corynebacterium; s__unclassified_Corynebacterium
ASV768	0	0	19	206	k__Bacteria; p__Firmicutes; c__Clostridia; o__Lachnospirales; f__Lachnospiraceae; g__unclassified_Lachnospiraceae; s__unclassified_Lachnospiraceae
ASV769	0	23	0	52	k__Bacteria; p__Bacteroidota; c__Bacteroidia; o__Bacteroidales; f__Rikenellaceae; g__Alistipes; s__Alistipes_obesi
ASV770	67	0	35	64	k__Bacteria; p__Firmicutes; c__Clostridia; o__Oscillospirales; f__Ruminococcaceae; g__UBA1819; s__unclassified_UBA1819
ASV771	0	0	200	0	k__Bacteria; p__Firmicutes; c__Clostridia; o__Lachnospirales; f__Lachnospiraceae; g__Lachnospiraceae_UCG_001; s__unclassified_Lachnospiraceae_UCG_001
ASV772	162	0	0	32	k__Bacteria; p__Bacteroidota; c__Bacteroidia; o__Bacteroidales; f__Bacteroidaceae; g__Bacteroides; s__unclassified_Bacteroides
ASV773	0	29	63	13	k__Bacteria; p__Firmicutes; c__Clostridia; o__Oscillospirales; f__Oscillospiraceae; g__unclassified_Oscillospiraceae; s__unclassified_Oscillospiraceae
ASV774	0	39	9	0	k__Bacteria; p__Bacteroidota; c__Bacteroidia; o__Bacteroidales; f__Rikenellaceae; g__Alistipes; s__unclassified_Alistipes
ASV775	0	0	12	167	k__Bacteria; p__Firmicutes; c__Clostridia; o__Peptococcales; f__Peptococcaceae; g__unclassified_Peptococcaceae; s__unclassified_Peptococcaceae
ASV776	86	157	0	0	k__Bacteria; p__Bacteroidota; c__Bacteroidia; o__Bacteroidales; f__Muribaculaceae; g__unclassified_Muribaculaceae; s__unclassified_Muribaculaceae
ASV777	7	125	0	0	k__Bacteria; p__Firmicutes; c__Clostridia; o__Lachnospirales; f__Lachnospiraceae; g__unclassified_Lachnospiraceae; s__unclassified_Lachnospiraceae
ASV778	0	44	104	0	k__Bacteria; p__Proteobacteria; c__Alphaproteobacteria; o__Rhodospirillales; f__unclassified_Rhodospirillales; g__unclassified_Rhodospirillales; s__unclassified_Rhodospirillales
ASV779	20	88	109	173	k__Bacteria; p__Actinobacteriota; c__Coriobacteriia; o__Coriobacteriales; f__Eggerthellaceae; g__unclassified_Eggerthellaceae; s__unclassified_Eggerthellaceae
ASV781	12	51	55	0	k__Bacteria; p__Firmicutes; c__Clostridia; o__Lachnospirales; f__Lachnospiraceae; g__unclassified_Lachnospiraceae; s__unclassified_Lachnospiraceae
ASV782	0	151	0	0	k__Bacteria; p__Proteobacteria; c__Gammaproteobacteria; o__Burkholderiales; f__Sutterellaceae; g__Parasutterella; s__unclassified_Parasutterella
ASV783	89	225	0	0	k__Bacteria; p__Bacteroidota; c__Bacteroidia; o__Bacteroidales; f__Muribaculaceae; g__uncultured_Bacteroidales_bacterium; s__uncultured_Bacteroidales_bacterium
ASV784	0	104	18	0	k__Bacteria; p__Firmicutes; c__Clostridia; o__Lachnospirales; f__Lachnospiraceae; g__unclassified_Lachnospiraceae; s__unclassified_Lachnospiraceae
ASV785	4	23	17	58	k__Bacteria; p__Firmicutes; c__Clostridia; o__Oscillospirales; f__Ruminococcaceae; g__unclassified_Ruminococcaceae; s__unclassified_Ruminococcaceae
ASV786	90	133	164	33	k__Bacteria; p__Firmicutes; c__Clostridia; o__Lachnospirales; f__Lachnospiraceae; g__unclassified_Lachnospiraceae; s__unclassified_Lachnospiraceae
ASV787	183	0	0	34	k__Bacteria; p__Firmicutes; c__Clostridia; o__Clostridia_UCG_014; f__unclassified_Clostridia_UCG_014; g__unclassified_Clostridia_UCG_014; s__unclassified_Clostridia_UCG_014
ASV789	0	0	337	0	k__Bacteria; p__Bacteroidota; c__Bacteroidia; o__Bacteroidales; f__Muribaculaceae; g__unclassified_Muribaculaceae; s__unclassified_Muribaculaceae
ASV791	6	64	253	7	k__Bacteria; p__Firmicutes; c__Clostridia; o__Lachnospirales; f__Lachnospiraceae; g__unclassified_Lachnospiraceae; s__unclassified_Lachnospiraceae
ASV792	108	130	45	88	k__Bacteria; p__Firmicutes; c__Clostridia; o__Clostridia_UCG_014; f__unclassified_Clostridia_UCG_014; g__unclassified_Clostridia_UCG_014; s__unclassified_Clostridia_UCG_014
ASV793	0	0	0	17	k__Bacteria; p__Firmicutes; c__Clostridia; o__Lachnospirales; f__Lachnospiraceae; g__unclassified_Lachnospiraceae; s__unclassified_Lachnospiraceae
ASV794	0	38	77	61	k__Bacteria; p__Actinobacteriota; c__Coriobacteriia; o__Coriobacteriales; f__Eggerthellaceae; g__unclassified_Eggerthellaceae; s__uncultured_Coriobacteriales_bacterium
ASV795	0	0	69	0	k__Bacteria; p__Firmicutes; c__Clostridia; o__Oscillospirales; f__Oscillospiraceae; g__unclassified_Oscillospiraceae; s__unclassified_Oscillospiraceae
ASV796	46	0	0	21	k__Bacteria; p__Firmicutes; c__Clostridia; o__Clostridia_vadinBB60_group; f__unclassified_Clostridia_vadinBB60_group; g__unclassified_Clostridia_vadinBB60_group; s__unclassified_Clostridia_vadinBB60_group
ASV797	57	81	18	0	k__Bacteria; p__Firmicutes; c__Clostridia; o__Oscillospirales; f__Oscillospiraceae; g__UCG_005; s__uncultured_Clostridiales_bacterium
ASV798	0	0	0	54	k__Bacteria; p__Firmicutes; c__Clostridia; o__Lachnospirales; f__Lachnospiraceae; g__A2; s__unclassified_A2
ASV800	0	128	44	0	k__Bacteria; p__Firmicutes; c__Clostridia; o__Lachnospirales; f__Lachnospiraceae; g__unclassified_Lachnospiraceae; s__unclassified_Lachnospiraceae
ASV801	5	43	0	26	k__Bacteria; p__Firmicutes; c__Bacilli; o__Erysipelotrichales; f__Erysipelotrichaceae; g__unclassified_Erysipelotrichaceae; s__unclassified_Erysipelotrichaceae
ASV802	12	78	145	0	k__Bacteria; p__Firmicutes; c__Bacilli; o__Lactobacillales; f__Streptococcaceae; g__Streptococcus; s__Streptococcus_hyointestinalis
ASV803	0	51	69	72	k__Bacteria; p__Firmicutes; c__Clostridia; o__Oscillospirales; f__Oscillospiraceae; g__unclassified_Oscillospiraceae; s__unclassified_Oscillospiraceae
ASV804	12	435	242	0	k__Bacteria; p__Firmicutes; c__Clostridia; o__Lachnospirales; f__Lachnospiraceae; g__unclassified_Lachnospiraceae; s__unclassified_Lachnospiraceae
ASV805	44	226	69	34	k__Bacteria; p__Patescibacteria; c__Saccharimonadia; o__Saccharimonadales; f__Saccharimonadaceae; g__Candidatus_Saccharimonas; s__unclassified_Candidatus_Saccharimonas
ASV806	0	539	0	0	k__Bacteria; p__Firmicutes; c__Bacilli; o__Staphylococcales; f__Staphylococcaceae; g__Staphylococcus; s__unclassified_Staphylococcus
ASV807	0	0	31	0	k__Bacteria; p__Actinobacteriota; c__Actinobacteria; o__Corynebacteriales; f__Corynebacteriaceae; g__Corynebacterium; s__Corynebacterium_stationis
ASV808	232	0	0	0	k__Bacteria; p__Bacteroidota; c__Bacteroidia; o__Bacteroidales; f__Muribaculaceae; g__unclassified_Muribaculaceae; s__unclassified_Muribaculaceae
ASV810	0	10	8	18	k__Bacteria; p__Firmicutes; c__Clostridia; o__Lachnospirales; f__Lachnospiraceae; g__unclassified_Lachnospiraceae; s__unclassified_Lachnospiraceae
ASV811	64	0	355	0	k__Bacteria; p__Bacteroidota; c__Bacteroidia; o__Bacteroidales; f__Tannerellaceae; g__Parabacteroides; s__unclassified_Parabacteroides
ASV812	0	0	0	39	k__Bacteria; p__Firmicutes; c__Clostridia; o__Oscillospirales; f__Oscillospiraceae; g__unclassified_Oscillospiraceae; s__unclassified_Oscillospiraceae
ASV813	14	6	0	53	k__Bacteria; p__Firmicutes; c__Clostridia; o__Clostridia_vadinBB60_group; f__unclassified_Clostridia_vadinBB60_group; g__unclassified_Clostridia_vadinBB60_group; s__unclassified_Clostridia_vadinBB60_group
ASV814	0	2	0	15	k__Bacteria; p__Cyanobacteria; c__Vampirivibrionia; o__Gastranaerophilales; f__uncultured_rumen_bacterium; g__uncultured_rumen_bacterium; s__uncultured_rumen_bacterium
ASV816	30	86	23	19	k__Bacteria; p__Bacteroidota; c__Bacteroidia; o__Bacteroidales; f__Rikenellaceae; g__Alistipes; s__Alistipes_indistinctus
ASV818	0	155	53	13	k__Bacteria; p__Bacteroidota; c__Bacteroidia; o__Bacteroidales; f__Muribaculaceae; g__unclassified_Muribaculaceae; s__unclassified_Muribaculaceae
ASV819	0	58	26	98	k__Bacteria; p__Firmicutes; c__Clostridia; o__Oscillospirales; f__Ruminococcaceae; g__Anaerotruncus; s__unclassified_Anaerotruncus
ASV820	0	206	0	557	k__Bacteria; p__Firmicutes; c__Clostridia; o__Clostridia_UCG_014; f__unclassified_Clostridia_UCG_014; g__unclassified_Clostridia_UCG_014; s__unclassified_Clostridia_UCG_014
ASV821	0	0	282	74	k__Bacteria; p__Firmicutes; c__Clostridia; o__Oscillospirales; f__UCG_010; g__unclassified_UCG_010; s__unclassified_UCG_010
ASV822	0	112	0	0	k__Bacteria; p__Bacteroidota; c__Bacteroidia; o__Bacteroidales; f__Muribaculaceae; g__unclassified_Muribaculaceae; s__unclassified_Muribaculaceae
ASV826	0	21	0	0	k__Bacteria; p__Firmicutes; c__Clostridia; o__Oscillospirales; f__Butyricicoccaceae; g__Butyricicoccus; s__unclassified_Butyricicoccus
ASV827	32	110	34	15	k__Bacteria; p__Firmicutes; c__Clostridia; o__Peptostreptococcales_Tissierellales; f__Anaerovoracaceae; g__Family_XIII_UCG_001; s__unclassified_Family_XIII_UCG_001
ASV828	0	0	340	37	k__Bacteria; p__Bacteroidota; c__Bacteroidia; o__Bacteroidales; f__Bacteroidaceae; g__Bacteroides; s__Bacteroides_intestinalis
ASV829	6	62	22	0	k__Bacteria; p__Firmicutes; c__Clostridia; o__Lachnospirales; f__Lachnospiraceae; g__unclassified_Lachnospiraceae; s__unclassified_Lachnospiraceae
ASV830	171	0	0	51	k__Bacteria; p__Proteobacteria; c__Alphaproteobacteria; o__Rhodospirillales; f__unclassified_Rhodospirillales; g__Azospirillum_sp._47_25; s__unclassified_Rhodospirillales
ASV831	0	117	38	0	k__Bacteria; p__Firmicutes; c__Clostridia; o__Lachnospirales; f__Lachnospiraceae; g__unclassified_Lachnospiraceae; s__unclassified_Lachnospiraceae
ASV832	81	39	12	34	k__Bacteria; p__Firmicutes; c__Clostridia; o__Clostridia_vadinBB60_group; f__unclassified_Clostridia_vadinBB60_group; g__unclassified_Clostridia_vadinBB60_group; s__unclassified_Clostridia_vadinBB60_group
ASV834	31	37	0	0	k__Bacteria; p__Firmicutes; c__Clostridia; o__Clostridia_UCG_014; f__unclassified_Clostridia_UCG_014; g__unclassified_Clostridia_UCG_014; s__unclassified_Clostridia_UCG_014
ASV835	0	8	19	49	k__Bacteria; p__Bacteroidota; c__Bacteroidia; o__Bacteroidales; f__Rikenellaceae; g__Alistipes; s__unclassified_Alistipes
ASV836	37	0	0	0	k__Bacteria; p__Firmicutes; c__Clostridia; o__Oscillospirales; f__Oscillospiraceae; g__Colidextribacter; s__unclassified_Colidextribacter
ASV838	38	60	0	0	k__Bacteria; p__Bacteroidota; c__Bacteroidia; o__Bacteroidales; f__Muribaculaceae; g__uncultured_Bacteroidales_bacterium; s__uncultured_Bacteroidales_bacterium
ASV839	0	0	64	70	k__Bacteria; p__Bacteroidota; c__Bacteroidia; o__Bacteroidales; f__Muribaculaceae; g__uncultured_Bacteroidales_bacterium; s__uncultured_Bacteroidales_bacterium
ASV840	4	1	56	0	k__Bacteria; p__Bacteroidota; c__Bacteroidia; o__Bacteroidales; f__Tannerellaceae; g__Parabacteroides; s__unclassified_Parabacteroides
ASV841	0	0	0	18	k__Bacteria; p__Firmicutes; c__Clostridia; o__Monoglobales; f__Monoglobaceae; g__Monoglobus; s__unclassified_Monoglobus
ASV843	0	197	0	0	k__Bacteria; p__Bacteroidota; c__Bacteroidia; o__Bacteroidales; f__Muribaculaceae; g__unclassified_Muribaculaceae; s__unclassified_Muribaculaceae
ASV844	0	50	6	130	k__Bacteria; p__Firmicutes; c__Clostridia; o__Christensenellales; f__Christensenellaceae; g__Christensenellaceae_R_7_group; s__unclassified_Christensenellaceae_R_7_group
ASV846	0	1	0	0	k__Bacteria; p__Bacteroidota; c__Bacteroidia; o__Bacteroidales; f__Bacteroidaceae; g__Bacteroides; s__Bacteroides_caecimuris
ASV847	0	0	0	102	k__Bacteria; p__Firmicutes; c__Bacilli; o__Erysipelotrichales; f__Erysipelotrichaceae; g__unclassified_Erysipelotrichaceae; s__unclassified_Erysipelotrichaceae
ASV849	0	0	0	122	k__Bacteria; p__Bacteroidota; c__Bacteroidia; o__Bacteroidales; f__Rikenellaceae; g__Alistipes; s__unclassified_Alistipes
ASV850	0	105	193	0	k__Bacteria; p__Firmicutes; c__Clostridia; o__Clostridia_UCG_014; f__unclassified_Clostridia_UCG_014; g__unclassified_Clostridia_UCG_014; s__unclassified_Clostridia_UCG_014
ASV852	46	0	56	0	k__Bacteria; p__Firmicutes; c__Clostridia; o__Lachnospirales; f__Lachnospiraceae; g__Lachnospiraceae_NK4A136_group; s__unclassified_Lachnospiraceae_NK4A136_group
ASV853	47	86	153	0	k__Bacteria; p__Firmicutes; c__Clostridia; o__Christensenellales; f__Christensenellaceae; g__Christensenella; s__Christensenella_minuta
ASV854	0	42	98	35	k__Bacteria; p__Bacteroidota; c__Bacteroidia; o__Bacteroidales; f__Tannerellaceae; g__Parabacteroides; s__unclassified_Parabacteroides
ASV857	0	22	0	0	k__Bacteria; p__Bacteroidota; c__Bacteroidia; o__Bacteroidales; f__Muribaculaceae; g__unclassified_Muribaculaceae; s__unclassified_Muribaculaceae
ASV859	0	48	130	0	k__Bacteria; p__Bacteroidota; c__Bacteroidia; o__Bacteroidales; f__Muribaculaceae; g__unclassified_Muribaculaceae; s__unclassified_Muribaculaceae
ASV861	0	62	0	0	k__Bacteria; p__Firmicutes; c__Clostridia; o__Lachnospirales; f__Lachnospiraceae; g__Lachnospiraceae_NK4A136_group; s__unclassified_Lachnospiraceae_NK4A136_group
ASV862	26	120	5	0	k__Bacteria; p__Bacteroidota; c__Bacteroidia; o__Bacteroidales; f__Tannerellaceae; g__Parabacteroides; s__unclassified_Parabacteroides
ASV863	16	86	9	91	k__Bacteria; p__Firmicutes; c__Clostridia; o__Oscillospirales; f__Oscillospiraceae; g__unclassified_Oscillospiraceae; s__unclassified_Oscillospiraceae
ASV864	0	37	0	0	k__Bacteria; p__Firmicutes; c__Clostridia; o__Clostridia_UCG_014; f__unclassified_Clostridia_UCG_014; g__unclassified_Clostridia_UCG_014; s__unclassified_Clostridia_UCG_014
ASV865	0	25	21	0	k__Bacteria; p__Firmicutes; c__Clostridia; o__Oscillospirales; f__Oscillospiraceae; g__unclassified_Oscillospiraceae; s__unclassified_Oscillospiraceae
ASV866	61	20	27	8	k__Bacteria; p__Cyanobacteria; c__Vampirivibrionia; o__Gastranaerophilales; f__uncultured_rumen_bacterium; g__uncultured_rumen_bacterium; s__uncultured_rumen_bacterium
ASV867	11	50	55	19	k__Bacteria; p__Firmicutes; c__Clostridia; o__Oscillospirales; f__Oscillospiraceae; g__unclassified_Oscillospiraceae; s__unclassified_Oscillospiraceae
ASV869	0	22	0	0	k__Bacteria; p__Bacteroidota; c__Bacteroidia; o__Bacteroidales; f__Rikenellaceae; g__Alistipes; s__unclassified_Alistipes
ASV870	95	293	17	0	k__Bacteria; p__Firmicutes; c__Clostridia; o__Lachnospirales; f__Lachnospiraceae; g__unclassified_Lachnospiraceae; s__unclassified_Lachnospiraceae
ASV871	0	0	0	61	k__Bacteria; p__Firmicutes; c__Clostridia; o__Lachnospirales; f__Lachnospiraceae; g__Lachnospiraceae_NK4A136_group; s__unclassified_Lachnospiraceae_NK4A136_group
ASV873	60	165	136	15	k__Bacteria; p__Firmicutes; c__Clostridia; o__Oscillospirales; f__Oscillospiraceae; g__unclassified_Oscillospiraceae; s__unclassified_Oscillospiraceae
ASV876	0	14	135	0	k__Bacteria; p__Firmicutes; c__Clostridia; o__Clostridia_UCG_014; f__unclassified_Clostridia_UCG_014; g__unclassified_Clostridia_UCG_014; s__unclassified_Clostridia_UCG_014
ASV877	0	0	56	0	k__Bacteria; p__Bacteroidota; c__Bacteroidia; o__Bacteroidales; f__Muribaculaceae; g__unclassified_Muribaculaceae; s__unclassified_Muribaculaceae
ASV878	0	325	0	0	k__Bacteria; p__Firmicutes; c__Clostridia; o__Clostridia_UCG_014; f__unclassified_Clostridia_UCG_014; g__unclassified_Clostridia_UCG_014; s__unclassified_Clostridia_UCG_014
ASV879	0	0	0	12	k__Bacteria; p__Firmicutes; c__Clostridia; o__Lachnospirales; f__Lachnospiraceae; g__Lachnospiraceae_NK4A136_group; s__unclassified_Lachnospiraceae_NK4A136_group
ASV881	0	33	77	84	k__Bacteria; p__Actinobacteriota; c__Coriobacteriia; o__Coriobacteriales; f__Eggerthellaceae; g__Parvibacter; s__unclassified_Parvibacter
ASV883	0	101	0	0	k__Bacteria; p__Bacteroidota; c__Bacteroidia; o__Bacteroidales; f__Muribaculaceae; g__unclassified_Muribaculaceae; s__unclassified_Muribaculaceae
ASV884	0	42	0	1	k__Bacteria; p__Firmicutes; c__Clostridia; o__Lachnospirales; f__Lachnospiraceae; g__unclassified_Lachnospiraceae; s__unclassified_Lachnospiraceae
ASV886	0	21	0	0	k__Bacteria; p__Firmicutes; c__Clostridia; o__Oscillospirales; f__Oscillospiraceae; g__unclassified_Oscillospiraceae; s__unclassified_Oscillospiraceae
ASV887	0	0	0	36	k__Bacteria; p__Bacteroidota; c__Bacteroidia; o__Bacteroidales; f__Muribaculaceae; g__unclassified_Muribaculaceae; s__unclassified_Muribaculaceae
ASV889	127	204	0	0	k__Bacteria; p__Firmicutes; c__Clostridia; o__Lachnospirales; f__Lachnospiraceae; g__unclassified_Lachnospiraceae; s__unclassified_Lachnospiraceae
ASV890	0	0	0	56	k__Bacteria; p__Firmicutes; c__Clostridia; o__Clostridia_UCG_014; f__unclassified_Clostridia_UCG_014; g__unclassified_Clostridia_UCG_014; s__unclassified_Clostridia_UCG_014
ASV891	0	86	142	0	k__Bacteria; p__Bacteroidota; c__Bacteroidia; o__Bacteroidales; f__Tannerellaceae; g__Parabacteroides; s__unclassified_Parabacteroides
ASV892	179	0	0	0	k__Bacteria; p__Actinobacteriota; c__Actinobacteria; o__Micrococcales; f__Dermabacteraceae; g__Brachybacterium; s__unclassified_Brachybacterium
ASV893	0	0	650	0	k__Bacteria; p__Bacteroidota; c__Bacteroidia; o__Bacteroidales; f__Bacteroidaceae; g__Bacteroides; s__unclassified_Bacteroides
ASV894	0	48	10	8	k__Bacteria; p__Firmicutes; c__Clostridia; o__Lachnospirales; f__Lachnospiraceae; g__unclassified_Lachnospiraceae; s__unclassified_Lachnospiraceae
ASV896	0	0	162	0	k__Bacteria; p__Firmicutes; c__Clostridia; o__Lachnospirales; f__Lachnospiraceae; g__unclassified_Lachnospiraceae; s__unclassified_Lachnospiraceae
ASV897	0	36	0	0	k__Bacteria; p__Firmicutes; c__Clostridia; o__Lachnospirales; f__Lachnospiraceae; g__unclassified_Lachnospiraceae; s__unclassified_Lachnospiraceae
ASV898	44	0	0	0	k__Bacteria; p__Desulfobacterota; c__Desulfovibrionia; o__Desulfovibrionales; f__Desulfovibrionaceae; g__Desulfovibrio; s__unclassified_Desulfovibrio
ASV900	0	82	0	148	k__Bacteria; p__Firmicutes; c__Clostridia; o__Clostridia_UCG_014; Unclassified; Unclassified; Unclassified
ASV902	29	15	8	0	k__Bacteria; p__Firmicutes; c__Bacilli; o__Erysipelotrichales; f__Erysipelotrichaceae; g__Holdemania; s__unclassified_Holdemania
ASV904	0	0	0	18	k__Bacteria; p__Firmicutes; c__Bacilli; o__Erysipelotrichales; f__Erysipelotrichaceae; g__unclassified_Erysipelotrichaceae; s__unclassified_Erysipelotrichaceae
ASV905	35	42	0	0	k__Bacteria; p__Firmicutes; c__Clostridia; o__Clostridia_vadinBB60_group; f__unclassified_Clostridia_vadinBB60_group; g__unclassified_Clostridia_vadinBB60_group; s__unclassified_Clostridia_vadinBB60_group
ASV907	76	146	44	0	k__Bacteria; p__Firmicutes; c__Clostridia; o__Lachnospirales; f__Lachnospiraceae; g__ASF356; s__unclassified_ASF356
ASV910	0	0	0	18	k__Bacteria; p__Firmicutes; c__Clostridia; o__Clostridia_vadinBB60_group; f__unclassified_Clostridia_vadinBB60_group; g__unclassified_Clostridia_vadinBB60_group; s__unclassified_Clostridia_vadinBB60_group
ASV911	0	0	0	62	k__Bacteria; p__Bacteroidota; c__Bacteroidia; o__Bacteroidales; f__Rikenellaceae; g__Alistipes; s__Bacteroides_sp._DSM_12148
ASV913	9	0	27	0	k__Bacteria; p__Firmicutes; c__Clostridia; o__Lachnospirales; f__Lachnospiraceae; g__unclassified_Lachnospiraceae; s__unclassified_Lachnospiraceae
ASV914	0	52	47	6	k__Bacteria; p__Firmicutes; c__Clostridia; o__Oscillospirales; f__Oscillospiraceae; g__Oscillibacter; s__unclassified_Oscillibacter
ASV915	0	0	260	0	k__Bacteria; p__Bacteroidota; c__Bacteroidia; o__Bacteroidales; f__Muribaculaceae; g__unclassified_Muribaculaceae; s__unclassified_Muribaculaceae
ASV916	62	79	0	0	k__Bacteria; p__Firmicutes; c__Clostridia; o__Lachnospirales; f__Lachnospiraceae; g__unclassified_Lachnospiraceae; s__unclassified_Lachnospiraceae
ASV918	0	41	24	16	k__Bacteria; p__Firmicutes; c__Clostridia; o__Lachnospirales; f__Lachnospiraceae; g__Marvinbryantia; s__Clostridiales_bacterium_CIEAF_012
ASV919	45	10	24	24	k__Bacteria; p__Proteobacteria; c__Alphaproteobacteria; o__Rhodospirillales; f__unclassified_Rhodospirillales; g__unclassified_Rhodospirillales; s__unclassified_Rhodospirillales
ASV922	0	134	93	0	k__Bacteria; p__Firmicutes; c__Clostridia; o__Lachnospirales; f__Lachnospiraceae; g__unclassified_Lachnospiraceae; s__unclassified_Lachnospiraceae
ASV923	0	76	74	77	k__Bacteria; p__Firmicutes; c__Clostridia; o__Christensenellales; f__Christensenellaceae; g__Christensenella_sp._Marseille_P2437; s__unclassified_Christensenella_sp._Marseille_P2437
ASV924	0	9	0	441	k__Bacteria; p__Firmicutes; c__Clostridia; o__Lachnospirales; f__Lachnospiraceae; g__unclassified_Lachnospiraceae; s__unclassified_Lachnospiraceae
ASV925	65	18	0	0	k__Bacteria; p__Bacteroidota; c__Bacteroidia; o__Bacteroidales; f__Rikenellaceae; g__Alistipes; s__unclassified_Alistipes
ASV926	0	311	0	0	k__Bacteria; p__Firmicutes; c__Clostridia; o__Clostridia_UCG_014; f__unclassified_Clostridia_UCG_014; g__unclassified_Clostridia_UCG_014; s__unclassified_Clostridia_UCG_014
ASV927	0	47	0	125	k__Bacteria; p__Firmicutes; c__Clostridia; o__Oscillospirales; f__Ruminococcaceae; g__unclassified_Ruminococcaceae; s__[Clostridium]_leptum
ASV928	0	0	0	23	k__Bacteria; p__Firmicutes; c__Clostridia; o__Lachnospirales; f__Lachnospiraceae; g__Lachnospiraceae_NK4A136_group; s__unclassified_Lachnospiraceae_NK4A136_group
ASV929	13	0	21	70	k__Bacteria; p__Firmicutes; c__Clostridia; o__Oscillospirales; f__Ruminococcaceae; g__unclassified_Ruminococcaceae; s__unclassified_Ruminococcaceae
ASV930	0	0	0	11	k__Bacteria; p__Firmicutes; c__Clostridia; o__Lachnospirales; f__Lachnospiraceae; g__unclassified_Lachnospiraceae; s__unclassified_Lachnospiraceae
ASV931	0	0	0	74	k__Bacteria; p__Firmicutes; c__Clostridia; o__Clostridia_UCG_014; f__unclassified_Clostridia_UCG_014; g__unclassified_Clostridia_UCG_014; s__unclassified_Clostridia_UCG_014
ASV933	60	15	59	0	k__Bacteria; p__Firmicutes; c__Clostridia; o__Oscillospirales; f__Oscillospiraceae; g__unclassified_Oscillospiraceae; s__unclassified_Oscillospiraceae
ASV935	0	0	0	208	k__Bacteria; p__Firmicutes; c__Clostridia; o__Lachnospirales; f__Lachnospiraceae; g__unclassified_Lachnospiraceae; s__unclassified_Lachnospiraceae
ASV937	0	58	0	0	k__Bacteria; p__Firmicutes; c__Bacilli; o__Erysipelotrichales; f__Erysipelotrichaceae; g__unclassified_Erysipelotrichaceae; s__unclassified_Erysipelotrichaceae
ASV938	0	38	49	0	k__Bacteria; p__Firmicutes; c__Clostridia; o__Lachnospirales; f__Lachnospiraceae; g__unclassified_Lachnospiraceae; s__unclassified_Lachnospiraceae
ASV939	44	116	61	23	k__Bacteria; p__Firmicutes; c__Bacilli; o__Izemoplasmatales; f__unclassified_Izemoplasmatales; g__unclassified_Izemoplasmatales; s__unclassified_Izemoplasmatales
ASV940	11	120	0	44	k__Bacteria; p__Bacteroidota; c__Bacteroidia; o__Bacteroidales; f__Muribaculaceae; g__unclassified_Muribaculaceae; s__unclassified_Muribaculaceae
ASV946	57	2	4	0	k__Bacteria; p__Bacteroidota; c__Bacteroidia; o__Bacteroidales; f__Tannerellaceae; g__Parabacteroides; s__unclassified_Parabacteroides
ASV947	0	57	0	0	k__Bacteria; p__Firmicutes; c__Clostridia; o__Oscillospirales; f__Oscillospiraceae; g__unclassified_Oscillospiraceae; s__uncultured_Oscillospira_sp.
ASV948	0	0	52	0	k__Bacteria; p__Bacteroidota; c__Bacteroidia; o__Bacteroidales; f__Muribaculaceae; g__unclassified_Muribaculaceae; s__unclassified_Muribaculaceae
ASV949	0	0	77	42	k__Bacteria; p__Bacteroidota; c__Bacteroidia; o__Bacteroidales; f__Muribaculaceae; g__uncultured_Bacteroidales_bacterium; s__uncultured_Bacteroidales_bacterium
ASV950	136	65	47	13	k__Bacteria; p__Firmicutes; c__Clostridia; o__Lachnospirales; f__Lachnospiraceae; g__GCA_900066575; s__unclassified_GCA_900066575
ASV951	0	21	0	0	k__Bacteria; p__Firmicutes; c__Clostridia; o__Lachnospirales; f__Lachnospiraceae; g__Lachnospiraceae_UCG_006; s__unclassified_Lachnospiraceae_UCG_006
ASV952	0	0	0	129	k__Bacteria; p__Firmicutes; c__Clostridia; o__Lachnospirales; f__Lachnospiraceae; g__unclassified_Lachnospiraceae; s__unclassified_Lachnospiraceae
ASV953	0	341	0	0	k__Bacteria; p__Firmicutes; c__Clostridia; o__Lachnospirales; f__Lachnospiraceae; g__unclassified_Lachnospiraceae; s__unclassified_Lachnospiraceae
ASV956	0	71	0	0	k__Bacteria; p__Firmicutes; c__Clostridia; o__Lachnospirales; f__Lachnospiraceae; g__unclassified_Lachnospiraceae; s__unclassified_Lachnospiraceae
ASV958	0	0	130	37	k__Bacteria; p__Actinobacteriota; c__Coriobacteriia; o__Coriobacteriales; f__Eggerthellaceae; g__Enterorhabdus; s__Adlercreutzia_muris
ASV961	32	60	0	0	k__Bacteria; p__Bacteroidota; c__Bacteroidia; o__Bacteroidales; f__Bacteroidaceae; g__Bacteroides; s__Bacteroides_caecimuris
ASV962	0	69	11	28	k__Bacteria; p__Firmicutes; c__Clostridia; o__Oscillospirales; f__Ruminococcaceae; g__Anaerotruncus; s__unclassified_Anaerotruncus
ASV963	0	0	0	70	k__Bacteria; p__Firmicutes; c__Clostridia; o__Lachnospirales; f__Lachnospiraceae; g__unclassified_Lachnospiraceae; s__unclassified_Lachnospiraceae
ASV965	0	0	426	0	k__Bacteria; p__Firmicutes; c__Clostridia; o__Lachnospirales; f__Lachnospiraceae; g__unclassified_Lachnospiraceae; s__unclassified_Lachnospiraceae
ASV967	109	0	0	33	k__Bacteria; p__Bacteroidota; c__Bacteroidia; o__Bacteroidales; f__Muribaculaceae; g__unclassified_Muribaculaceae; s__unclassified_Muribaculaceae
ASV968	0	12	9	23	k__Bacteria; p__Firmicutes; c__Clostridia; o__Clostridia_vadinBB60_group; f__unclassified_Clostridia_vadinBB60_group; g__unclassified_Clostridia_vadinBB60_group; s__unclassified_Clostridia_vadinBB60_group
ASV970	0	267	0	0	k__Bacteria; p__Firmicutes; c__Clostridia; o__Lachnospirales; f__Lachnospiraceae; g__unclassified_Lachnospiraceae; s__unclassified_Lachnospiraceae
ASV972	0	0	0	98	k__Bacteria; p__Bacteroidota; c__Bacteroidia; o__Bacteroidales; f__Muribaculaceae; g__unclassified_Muribaculaceae; s__unclassified_Muribaculaceae
ASV973	0	0	0	70	k__Bacteria; p__Bacteroidota; c__Bacteroidia; o__Bacteroidales; f__Muribaculaceae; g__unclassified_Muribaculaceae; s__unclassified_Muribaculaceae
ASV975	0	259	0	0	k__Bacteria; p__Firmicutes; c__Clostridia; o__Lachnospirales; f__Lachnospiraceae; g__unclassified_Lachnospiraceae; s__unclassified_Lachnospiraceae
ASV977	0	80	52	0	k__Bacteria; p__Proteobacteria; c__Gammaproteobacteria; o__Burkholderiales; f__Sutterellaceae; g__Parasutterella; s__unclassified_Parasutterella
ASV978	28	76	76	20	k__Bacteria; p__Firmicutes; c__Clostridia; o__Christensenellales; f__Christensenellaceae; g__unclassified_Christensenellaceae; s__unclassified_Christensenellaceae
ASV979	32	0	87	0	k__Bacteria; p__Firmicutes; c__Clostridia; o__Oscillospirales; f__Ruminococcaceae; g__Incertae_Sedis; s__unclassified_Incertae_Sedis
ASV980	0	133	0	0	k__Bacteria; p__Firmicutes; c__Clostridia; o__Clostridia_UCG_014; f__unclassified_Clostridia_UCG_014; g__unclassified_Clostridia_UCG_014; s__unclassified_Clostridia_UCG_014
ASV981	0	66	0	0	k__Bacteria; p__Firmicutes; c__Clostridia; o__Lachnospirales; f__Lachnospiraceae; g__Lachnospiraceae_NK4A136_group; s__Lachnospiraceae_bacterium_COE1
ASV982	0	0	0	131	k__Bacteria; p__Patescibacteria; c__Saccharimonadia; o__Saccharimonadales; f__Saccharimonadaceae; g__Candidatus_Saccharimonas; s__unclassified_Candidatus_Saccharimonas
ASV983	31	0	0	0	k__Bacteria; p__Firmicutes; c__Clostridia; o__Clostridia_UCG_014; f__unclassified_Clostridia_UCG_014; g__unclassified_Clostridia_UCG_014; s__unclassified_Clostridia_UCG_014
ASV984	0	15	0	3	k__Bacteria; p__Firmicutes; c__Clostridia; o__Lachnospirales; f__Lachnospiraceae; g__unclassified_Lachnospiraceae; s__unclassified_Lachnospiraceae
ASV987	16	183	47	0	k__Bacteria; p__Firmicutes; c__Clostridia; o__Oscillospirales; f__Butyricicoccaceae; g__UCG_009; s__unclassified_UCG_009
ASV989	88	0	0	92	k__Bacteria; p__Firmicutes; c__Bacilli; o__Erysipelotrichales; f__Erysipelatoclostridiaceae; g__unclassified_Erysipelatoclostridiaceae; s__unclassified_Erysipelatoclostridiaceae
ASV990	0	90	0	0	k__Bacteria; p__Firmicutes; c__Clostridia; o__Lachnospirales; f__Lachnospiraceae; g__Lachnospiraceae_NK4A136_group; s__Lachnospiraceae_bacterium_COE1
ASV991	0	8	27	25	k__Bacteria; p__Firmicutes; c__Clostridia; o__Peptostreptococcales_Tissierellales; f__Anaerovoracaceae; g__Family_XIII_AD3011_group; s__unclassified_Family_XIII_AD3011_group
ASV993	0	0	28	0	k__Bacteria; p__Bacteroidota; c__Bacteroidia; o__Bacteroidales; f__Tannerellaceae; g__Parabacteroides; s__Parabacteroides_goldsteinii
ASV997	62	0	85	0	k__Bacteria; p__Cyanobacteria; c__Vampirivibrionia; o__Gastranaerophilales; f__unclassified_Gastranaerophilales; g__unclassified_Gastranaerophilales; s__unclassified_Gastranaerophilales
ASV998	0	59	280	0	k__Bacteria; p__Firmicutes; c__Clostridia; o__Lachnospirales; f__Lachnospiraceae; g__unclassified_Lachnospiraceae; s__unclassified_Lachnospiraceae
ASV999	0	0	108	62	k__Bacteria; p__Firmicutes; c__Clostridia; o__Oscillospirales; f__UCG_010; g__unclassified_UCG_010; s__unclassified_UCG_010
ASV1000	8	20	38	8	k__Bacteria; p__Firmicutes; c__Bacilli; o__Lactobacillales; f__Streptococcaceae; g__Streptococcus; s__Streptococcus_danieliae
ASV1002	0	34	32	85	k__Bacteria; p__Bacteroidota; c__Bacteroidia; o__Bacteroidales; f__Muribaculaceae; g__uncultured_Bacteroidales_bacterium; s__uncultured_Bacteroidales_bacterium
ASV1003	27	0	0	2	k__Bacteria; p__Proteobacteria; c__Alphaproteobacteria; o__Rhodospirillales; f__unclassified_Rhodospirillales; g__Azospirillum_sp._47_25; s__unclassified_Rhodospirillales
ASV1004	0	0	0	43	k__Bacteria; p__Proteobacteria; c__Alphaproteobacteria; o__Rhodospirillales; f__unclassified_Rhodospirillales; g__unclassified_Rhodospirillales; s__unclassified_Rhodospirillales
ASV1005	0	0	9	0	k__Bacteria; p__Firmicutes; c__Clostridia; o__Lachnospirales; f__Lachnospiraceae; g__Blautia; s__unclassified_Blautia
ASV1007	27	403	0	0	k__Bacteria; p__Firmicutes; c__Clostridia; o__Clostridia_UCG_014; f__unclassified_Clostridia_UCG_014; g__unclassified_Clostridia_UCG_014; s__unclassified_Clostridia_UCG_014
ASV1009	0	70	46	0	k__Bacteria; p__Firmicutes; c__Clostridia; o__Oscillospirales; f__Ruminococcaceae; g__Paludicola; s__unclassified_Paludicola
ASV1011	0	0	302	0	k__Bacteria; p__Firmicutes; c__Clostridia; o__Clostridia_UCG_014; f__unclassified_Clostridia_UCG_014; g__unclassified_Clostridia_UCG_014; s__unclassified_Clostridia_UCG_014
ASV1014	0	0	17	38	k__Bacteria; p__Firmicutes; c__Clostridia; o__Lachnospirales; f__Lachnospiraceae; g__unclassified_Lachnospiraceae; s__unclassified_Lachnospiraceae
ASV1015	0	0	0	2	k__Bacteria; p__Proteobacteria; c__Gammaproteobacteria; o__Enterobacterales; f__Pasteurellaceae; g__Rodentibacter; s__unclassified_Rodentibacter
ASV1016	6	0	16	0	k__Bacteria; p__Bacteroidota; c__Bacteroidia; o__Bacteroidales; f__Tannerellaceae; g__Parabacteroides; s__unclassified_Parabacteroides
ASV1017	0	0	46	0	k__Bacteria; p__Firmicutes; c__Clostridia; o__Lachnospirales; f__Lachnospiraceae; g__Lachnospiraceae_NK4A136_group; s__unclassified_Lachnospiraceae_NK4A136_group
ASV1019	59	25	0	0	k__Bacteria; p__Firmicutes; c__Clostridia; o__Clostridia_UCG_014; f__unclassified_Clostridia_UCG_014; g__unclassified_Clostridia_UCG_014; s__unclassified_Clostridia_UCG_014
ASV1020	0	17	27	0	k__Bacteria; p__Firmicutes; c__Clostridia; o__Lachnospirales; f__Lachnospiraceae; g__Lachnospiraceae_NK4A136_group; s__Lachnospiraceae_bacterium_COE1
ASV1023	0	0	42	0	k__Bacteria; p__Firmicutes; c__Clostridia; o__Lachnospirales; f__Lachnospiraceae; g__unclassified_Lachnospiraceae; s__unclassified_Lachnospiraceae
ASV1024	0	0	0	44	k__Bacteria; p__Firmicutes; c__Clostridia; o__Lachnospirales; f__Lachnospiraceae; g__unclassified_Lachnospiraceae; s__unclassified_Lachnospiraceae
ASV1025	149	5	10	26	k__Bacteria; p__Firmicutes; c__Clostridia; o__Oscillospirales; f__UCG_010; g__unclassified_UCG_010; s__unclassified_UCG_010
ASV1026	0	124	0	0	k__Bacteria; p__Bacteroidota; c__Bacteroidia; o__Bacteroidales; f__Muribaculaceae; g__unclassified_Muribaculaceae; s__unclassified_Muribaculaceae
ASV1027	32	55	0	0	k__Bacteria; p__Firmicutes; c__Clostridia; o__Lachnospirales; f__Lachnospiraceae; g__Lachnospiraceae_UCG_006; s__unclassified_Lachnospiraceae_UCG_006
ASV1028	0	29	35	0	k__Bacteria; p__Firmicutes; c__Clostridia; o__Peptostreptococcales_Tissierellales; f__Anaerovoracaceae; g__unclassified_Anaerovoracaceae; s__unclassified_Anaerovoracaceae
ASV1030	0	0	21	0	k__Bacteria; p__Bacteroidota; c__Bacteroidia; o__Bacteroidales; f__Rikenellaceae; g__Alistipes; s__Alistipes_inops
ASV1031	4	85	32	18	k__Bacteria; p__Firmicutes; c__Clostridia; o__Lachnospirales; f__Lachnospiraceae; g__Acetatifactor; s__unclassified_Acetatifactor
ASV1032	0	0	0	11	k__Bacteria; p__Firmicutes; c__Clostridia; o__Lachnospirales; f__Lachnospiraceae; g__unclassified_Lachnospiraceae; s__unclassified_Lachnospiraceae
ASV1033	93	190	0	0	k__Bacteria; p__Actinobacteriota; c__Actinobacteria; o__Bifidobacteriales; f__Bifidobacteriaceae; g__Bifidobacterium; s__unclassified_Bifidobacterium
ASV1034	0	0	0	18	k__Bacteria; p__Firmicutes; c__Clostridia; o__Monoglobales; f__Monoglobaceae; g__Monoglobus; s__unclassified_Monoglobus
ASV1035	0	314	0	0	k__Bacteria; p__Bacteroidota; c__Bacteroidia; o__Bacteroidales; f__Muribaculaceae; g__unclassified_Muribaculaceae; s__unclassified_Muribaculaceae
ASV1037	21	86	18	62	k__Bacteria; p__Actinobacteriota; c__Coriobacteriia; o__Coriobacteriales; f__Eggerthellaceae; g__Enterorhabdus; s__unclassified_Enterorhabdus
ASV1038	0	0	75	0	k__Bacteria; p__Firmicutes; c__Clostridia; o__Lachnospirales; f__Lachnospiraceae; g__unclassified_Lachnospiraceae; s__unclassified_Lachnospiraceae
ASV1042	0	0	0	8	k__Bacteria; p__Firmicutes; c__Clostridia; o__Lachnospirales; f__Lachnospiraceae; g__Lachnospiraceae_NK4A136_group; s__unclassified_Lachnospiraceae_NK4A136_group
ASV1044	0	73	14	5	k__Bacteria; p__Actinobacteriota; c__Actinobacteria; o__Corynebacteriales; f__Corynebacteriaceae; g__Corynebacterium; s__unclassified_Corynebacterium
ASV1045	0	22	0	38	k__Bacteria; p__Firmicutes; c__Clostridia; o__Oscillospirales; f__Ruminococcaceae; g__unclassified_Ruminococcaceae; s__unclassified_Ruminococcaceae
ASV1047	14	29	7	34	k__Bacteria; p__Firmicutes; c__Clostridia; o__Lachnospirales; f__Lachnospiraceae; g__unclassified_Lachnospiraceae; s__unclassified_Lachnospiraceae
ASV1048	0	0	0	54	k__Bacteria; p__Firmicutes; c__Clostridia; o__Lachnospirales; f__Lachnospiraceae; g__Lachnospiraceae_NK4B4_group; s__unclassified_Lachnospiraceae_NK4B4_group
ASV1049	0	0	0	106	k__Bacteria; p__Firmicutes; c__Clostridia; o__Clostridia_UCG_014; f__unclassified_Clostridia_UCG_014; g__unclassified_Clostridia_UCG_014; s__unclassified_Clostridia_UCG_014
ASV1050	153	54	19	0	k__Bacteria; p__Firmicutes; c__Clostridia; o__Oscillospirales; f__Ruminococcaceae; g__Incertae_Sedis; s__unclassified_Incertae_Sedis
ASV1051	12	25	34	0	k__Bacteria; p__Bacteroidota; c__Bacteroidia; o__Bacteroidales; f__Marinifilaceae; g__Butyricimonas; s__Butyricimonas_virosa
ASV1052	36	17	29	0	k__Bacteria; p__Firmicutes; c__Clostridia; o__Lachnospirales; f__Lachnospiraceae; g__unclassified_Lachnospiraceae; s__unclassified_Lachnospiraceae
ASV1053	0	0	88	0	k__Bacteria; p__Firmicutes; c__Clostridia; o__Clostridia_UCG_014; f__unclassified_Clostridia_UCG_014; g__unclassified_Clostridia_UCG_014; s__unclassified_Clostridia_UCG_014
ASV1054	0	432	0	0	k__Bacteria; p__Bacteroidota; c__Bacteroidia; o__Bacteroidales; f__Muribaculaceae; g__unclassified_Muribaculaceae; s__unclassified_Muribaculaceae
ASV1056	0	0	0	62	k__Bacteria; p__Firmicutes; c__Clostridia; o__Lachnospirales; f__Lachnospiraceae; g__unclassified_Lachnospiraceae; s__unclassified_Lachnospiraceae
ASV1059	0	92	0	0	k__Bacteria; p__Bacteroidota; c__Bacteroidia; o__Bacteroidales; f__Rikenellaceae; g__Alistipes; s__unclassified_Alistipes
ASV1060	0	47	0	55	k__Bacteria; p__Firmicutes; c__Clostridia; o__Oscillospirales; f__Oscillospiraceae; g__NK4A214_group; s__unclassified_NK4A214_group
ASV1063	21	125	0	0	k__Bacteria; p__Firmicutes; c__Clostridia; o__Lachnospirales; f__Lachnospiraceae; g__unclassified_Lachnospiraceae; s__unclassified_Lachnospiraceae
ASV1064	0	51	0	45	k__Bacteria; p__Firmicutes; c__Clostridia; o__Oscillospirales; f__Oscillospiraceae; g__unclassified_Oscillospiraceae; s__unclassified_Oscillospiraceae
ASV1065	16	43	0	0	k__Bacteria; p__Firmicutes; c__Clostridia; o__Christensenellales; f__Christensenellaceae; g__Christensenellaceae_R_7_group; s__unclassified_Christensenellaceae_R_7_group
ASV1067	0	0	33	0	k__Bacteria; p__Firmicutes; c__Clostridia; o__Lachnospirales; f__Lachnospiraceae; g__unclassified_Lachnospiraceae; s__unclassified_Lachnospiraceae
ASV1068	0	0	0	16	k__Bacteria; p__Firmicutes; c__Clostridia; o__Monoglobales; f__Monoglobaceae; g__Monoglobus; s__unclassified_Monoglobus
ASV1070	0	0	207	0	k__Bacteria; p__Firmicutes; c__Clostridia; o__Lachnospirales; f__Lachnospiraceae; g__Lachnoclostridium; s__unclassified_Lachnoclostridium
ASV1072	0	19	0	0	k__Bacteria; p__Proteobacteria; c__Gammaproteobacteria; o__Enterobacterales; f__Enterobacteriaceae; g__unclassified_Enterobacteriaceae; s__unclassified_Enterobacteriaceae
ASV1074	0	254	0	0	k__Bacteria; p__Bacteroidota; c__Bacteroidia; o__Bacteroidales; f__Muribaculaceae; g__unclassified_Muribaculaceae; s__unclassified_Muribaculaceae
ASV1075	21	0	0	49	k__Bacteria; p__Firmicutes; c__Clostridia; o__Oscillospirales; f__Ruminococcaceae; g__Candidatus_Soleaferrea; s__unclassified_Candidatus_Soleaferrea
ASV1076	0	46	13	74	k__Bacteria; p__Actinobacteriota; c__Coriobacteriia; o__Coriobacteriales; f__Eggerthellaceae; g__Enterorhabdus; s__unclassified_Enterorhabdus
ASV1077	0	374	0	0	k__Bacteria; p__Firmicutes; c__Clostridia; o__Clostridia_UCG_014; f__unclassified_Clostridia_UCG_014; g__unclassified_Clostridia_UCG_014; s__unclassified_Clostridia_UCG_014
ASV1078	4	10	56	20	k__Bacteria; p__Desulfobacterota; c__Desulfovibrionia; o__Desulfovibrionales; f__Desulfovibrionaceae; g__unclassified_Desulfovibrionaceae; s__unclassified_Desulfovibrionaceae
ASV1079	0	32	0	0	k__Bacteria; p__Bacteroidota; c__Bacteroidia; o__Bacteroidales; f__Muribaculaceae; g__uncultured_Bacteroidales_bacterium; s__uncultured_Bacteroidales_bacterium
ASV1083	1	0	3	0	k__Bacteria; p__Bacteroidota; c__Bacteroidia; o__Bacteroidales; f__Tannerellaceae; g__Parabacteroides; s__unclassified_Parabacteroides
ASV1086	0	65	0	0	k__Bacteria; p__Firmicutes; c__Clostridia; o__Lachnospirales; f__Lachnospiraceae; g__Lachnospiraceae_NK4A136_group; s__unclassified_Lachnospiraceae_NK4A136_group
ASV1087	0	0	0	72	k__Bacteria; p__Bacteroidota; c__Bacteroidia; o__Bacteroidales; f__Rikenellaceae; g__Alistipes; s__Alistipes_obesi
ASV1088	87	0	27	7	k__Bacteria; p__Deferribacterota; c__Deferribacteres; o__Deferribacterales; f__Deferribacteraceae; g__Mucispirillum; s__unclassified_Mucispirillum
ASV1089	0	35	0	0	k__Bacteria; p__Bacteroidota; c__Bacteroidia; o__Bacteroidales; f__Muribaculaceae; g__uncultured_Bacteroidales_bacterium; s__uncultured_Bacteroidales_bacterium
ASV1093	0	100	64	0	k__Bacteria; p__Firmicutes; c__Clostridia; o__Lachnospirales; f__Lachnospiraceae; g__unclassified_Lachnospiraceae; s__unclassified_Lachnospiraceae
ASV1094	31	46	20	42	k__Bacteria; p__Firmicutes; c__Clostridia; o__Oscillospirales; f__Ruminococcaceae; g__unclassified_Ruminococcaceae; s__unclassified_Ruminococcaceae
ASV1095	67	0	40	0	k__Bacteria; p__Firmicutes; c__Clostridia; o__Oscillospirales; f__Ruminococcaceae; g__Candidatus_Soleaferrea; s__Ruminococcaceae_bacterium_GD6
ASV1096	0	33	92	11	k__Bacteria; p__Bacteroidota; c__Bacteroidia; o__Bacteroidales; f__Muribaculaceae; g__unclassified_Muribaculaceae; s__unclassified_Muribaculaceae
ASV1097	160	0	0	0	k__Bacteria; p__Firmicutes; c__Clostridia; o__Clostridia_UCG_014; f__unclassified_Clostridia_UCG_014; g__unclassified_Clostridia_UCG_014; s__unclassified_Clostridia_UCG_014
ASV1098	0	129	141	0	k__Bacteria; p__Firmicutes; c__Clostridia; o__Clostridia_UCG_014; f__unclassified_Clostridia_UCG_014; g__unclassified_Clostridia_UCG_014; s__unclassified_Clostridia_UCG_014
ASV1099	57	45	0	66	k__Bacteria; p__Firmicutes; c__Clostridia; o__Oscillospirales; f__Ruminococcaceae; g__Incertae_Sedis; s__unclassified_Incertae_Sedis
ASV1100	0	0	0	68	k__Bacteria; p__Firmicutes; c__Clostridia; o__Lachnospirales; f__Lachnospiraceae; g__Lachnospiraceae_UCG_006; s__unclassified_Lachnospiraceae_UCG_006
ASV1101	0	14	0	0	k__Bacteria; p__Firmicutes; c__Clostridia; o__Clostridia_UCG_014; f__unclassified_Clostridia_UCG_014; g__unclassified_Clostridia_UCG_014; s__unclassified_Clostridia_UCG_014
ASV1102	30	0	0	114	k__Bacteria; p__Firmicutes; c__Clostridia; o__Clostridia_UCG_014; f__unclassified_Clostridia_UCG_014; g__unclassified_Clostridia_UCG_014; s__unclassified_Clostridia_UCG_014
ASV1103	0	38	66	114	k__Bacteria; p__Firmicutes; c__Bacilli; o__RF39; f__uncultured_rumen_bacterium; g__uncultured_rumen_bacterium; s__uncultured_rumen_bacterium
ASV1105	0	0	0	34	k__Bacteria; p__Firmicutes; c__Clostridia; o__Lachnospirales; f__Lachnospiraceae; g__unclassified_Lachnospiraceae; s__unclassified_Lachnospiraceae
ASV1106	7	55	17	20	k__Bacteria; p__Firmicutes; c__Clostridia; o__Lachnospirales; f__Lachnospiraceae; g__GCA_900066575; s__unclassified_GCA_900066575
ASV1107	0	0	0	199	k__Bacteria; p__Bacteroidota; c__Bacteroidia; o__Bacteroidales; f__Muribaculaceae; g__unclassified_Muribaculaceae; s__unclassified_Muribaculaceae
ASV1109	0	151	24	0	k__Bacteria; p__Firmicutes; c__Clostridia; o__Oscillospirales; f__Ruminococcaceae; g__Incertae_Sedis; s__unclassified_Incertae_Sedis
ASV1111	368	0	0	0	k__Bacteria; p__Firmicutes; c__Clostridia; o__Clostridia_vadinBB60_group; f__unclassified_Clostridia_vadinBB60_group; g__unclassified_Clostridia_vadinBB60_group; s__unclassified_Clostridia_vadinBB60_group
ASV1112	0	0	0	44	k__Bacteria; p__Bacteroidota; c__Bacteroidia; o__Bacteroidales; f__Bacteroidaceae; g__Bacteroides; s__unclassified_Bacteroides
ASV1117	0	0	0	296	k__Bacteria; p__Firmicutes; c__Clostridia; o__Lachnospirales; f__Lachnospiraceae; g__unclassified_Lachnospiraceae; s__unclassified_Lachnospiraceae
ASV1118	0	9	13	42	k__Bacteria; p__Firmicutes; c__Clostridia; o__Oscillospirales; f__Oscillospiraceae; g__unclassified_Oscillospiraceae; s__unclassified_Oscillospiraceae
ASV1121	12	90	30	32	k__Bacteria; p__Firmicutes; c__Clostridia; o__Oscillospirales; f__[Eubacterium]_coprostanoligenes_group; g__unclassified_[Eubacterium]_coprostanoligenes_group; s__unclassified_[Eubacterium]_coprostanoligenes_group
ASV1122	0	0	0	243	k__Bacteria; p__Firmicutes; c__Clostridia; o__Clostridia_UCG_014; f__unclassified_Clostridia_UCG_014; g__unclassified_Clostridia_UCG_014; s__unclassified_Clostridia_UCG_014
ASV1123	56	0	0	30	k__Bacteria; p__Firmicutes; c__Clostridia; o__Oscillospirales; f__Ruminococcaceae; g__Harryflintia; s__unclassified_Harryflintia
ASV1125	0	20	33	0	k__Bacteria; p__Firmicutes; c__Clostridia; o__Oscillospirales; f__UCG_010; g__unclassified_UCG_010; s__unclassified_UCG_010
ASV1126	0	0	0	20	k__Bacteria; p__Bacteroidota; c__Bacteroidia; o__Bacteroidales; f__Rikenellaceae; g__Alistipes; s__unclassified_Alistipes
ASV1127	0	56	0	34	k__Bacteria; p__Firmicutes; c__Clostridia; o__Oscillospirales; f__Ruminococcaceae; g__Incertae_Sedis; s__unclassified_Incertae_Sedis
ASV1131	22	4	0	38	k__Bacteria; p__Firmicutes; c__Clostridia; o__Lachnospirales; f__Lachnospiraceae; g__unclassified_Lachnospiraceae; s__unclassified_Lachnospiraceae
ASV1133	0	32	19	13	k__Bacteria; p__Firmicutes; c__Clostridia; o__Lachnospirales; f__Lachnospiraceae; g__GCA_900066575; s__unclassified_GCA_900066575
ASV1134	0	0	36	24	k__Bacteria; p__Firmicutes; c__Clostridia; o__Oscillospirales; f__Ruminococcaceae; g__Incertae_Sedis; s__uncultured_Clostridiales_bacterium
ASV1135	0	218	16	0	k__Bacteria; p__Firmicutes; c__Clostridia; o__Oscillospirales; f__Ruminococcaceae; g__unclassified_Ruminococcaceae; s__unclassified_Ruminococcaceae
ASV1138	79	0	17	37	k__Bacteria; p__Firmicutes; c__Clostridia; o__Lachnospirales; f__Lachnospiraceae; g__Lachnospiraceae_NK4A136_group; s__unclassified_Lachnospiraceae_NK4A136_group
ASV1140	0	8	0	7	k__Bacteria; p__Actinobacteriota; c__Coriobacteriia; o__Coriobacteriales; f__Eggerthellaceae; g__Enterorhabdus; s__unclassified_Enterorhabdus
ASV1141	0	0	0	18	k__Bacteria; p__Firmicutes; c__Clostridia; o__Lachnospirales; f__Lachnospiraceae; g__unclassified_Lachnospiraceae; s__unclassified_Lachnospiraceae
ASV1142	58	0	72	0	k__Bacteria; p__Firmicutes; c__Clostridia; o__Peptococcales; f__Peptococcaceae; g__unclassified_Peptococcaceae; s__unclassified_Peptococcaceae
ASV1143	0	74	0	48	k__Bacteria; p__Firmicutes; c__Clostridia; o__Lachnospirales; f__Lachnospiraceae; g__unclassified_Lachnospiraceae; s__unclassified_Lachnospiraceae
ASV1144	0	129	0	0	k__Bacteria; p__Firmicutes; c__Clostridia; o__Lachnospirales; f__Lachnospiraceae; g__unclassified_Lachnospiraceae; s__unclassified_Lachnospiraceae
ASV1146	63	0	0	62	k__Bacteria; p__Firmicutes; c__Clostridia; o__Oscillospirales; f__Oscillospiraceae; g__Oscillibacter; s__unclassified_Oscillibacter
ASV1147	0	0	0	97	k__Bacteria; p__Firmicutes; c__Clostridia; o__unclassified_Clostridia; f__unclassified_Clostridia; g__unclassified_Clostridia; s__unclassified_Clostridia
ASV1149	81	174	26	0	k__Bacteria; p__Firmicutes; c__Clostridia; o__Oscillospirales; f__Ruminococcaceae; g__Incertae_Sedis; s__unclassified_Incertae_Sedis
ASV1150	0	0	34	24	k__Bacteria; p__Cyanobacteria; c__Vampirivibrionia; o__Gastranaerophilales; f__unclassified_Gastranaerophilales; g__unclassified_Gastranaerophilales; s__unclassified_Gastranaerophilales
ASV1152	111	173	0	0	k__Bacteria; p__Bacteroidota; c__Bacteroidia; o__Bacteroidales; f__Muribaculaceae; g__unclassified_Muribaculaceae; s__unclassified_Muribaculaceae
ASV1153	0	62	14	12	k__Bacteria; p__Bacteroidota; c__Bacteroidia; o__Bacteroidales; f__Marinifilaceae; g__Butyricimonas; s__Butyricimonas_virosa
ASV1154	0	2	0	0	k__Bacteria; p__Firmicutes; c__Negativicutes; o__Veillonellales_Selenomonadales; f__Selenomonadaceae; g__Megamonas; s__unclassified_Megamonas
ASV1155	65	16	17	0	k__Bacteria; p__Bacteroidota; c__Bacteroidia; o__Bacteroidales; f__Muribaculaceae; g__unclassified_Muribaculaceae; s__unclassified_Muribaculaceae
ASV1157	0	0	84	0	k__Bacteria; p__Firmicutes; c__Clostridia; o__Lachnospirales; f__Lachnospiraceae; g__unclassified_Lachnospiraceae; s__unclassified_Lachnospiraceae
ASV1158	0	55	0	0	k__Bacteria; p__Firmicutes; c__Clostridia; o__Lachnospirales; f__Lachnospiraceae; g__A2; s__unclassified_A2
ASV1159	0	10	16	0	k__Bacteria; p__Firmicutes; c__Clostridia; o__Lachnospirales; f__Lachnospiraceae; g__A2; s__unclassified_A2
ASV1160	0	211	0	0	k__Bacteria; p__Firmicutes; c__Clostridia; o__Lachnospirales; f__Lachnospiraceae; g__unclassified_Lachnospiraceae; s__unclassified_Lachnospiraceae
ASV1163	90	0	0	32	k__Bacteria; p__Firmicutes; c__Clostridia; o__Clostridia_UCG_014; f__unclassified_Clostridia_UCG_014; g__unclassified_Clostridia_UCG_014; s__unclassified_Clostridia_UCG_014
ASV1166	6	102	5	0	k__Bacteria; p__Firmicutes; c__Clostridia; o__Christensenellales; f__Christensenellaceae; g__Christensenellaceae_R_7_group; s__uncultured_Clostridium_sp.
ASV1167	329	0	0	0	k__Bacteria; p__Firmicutes; c__Clostridia; o__Oscillospirales; f__Oscillospiraceae; g__unclassified_Oscillospiraceae; s__unclassified_Oscillospiraceae
ASV1170	28	17	12	15	k__Bacteria; p__Firmicutes; c__Clostridia; o__Oscillospirales; f__Ruminococcaceae; g__unclassified_Ruminococcaceae; s__unclassified_Ruminococcaceae
ASV1173	22	0	156	0	k__Bacteria; p__Firmicutes; c__Clostridia; o__Lachnospirales; f__Lachnospiraceae; g__unclassified_Lachnospiraceae; s__unclassified_Lachnospiraceae
ASV1174	26	99	0	33	k__Bacteria; p__Firmicutes; c__Clostridia; o__Oscillospirales; f__Oscillospiraceae; g__NK4A214_group; s__unclassified_NK4A214_group
ASV1175	161	113	19	0	k__Bacteria; p__Firmicutes; c__Clostridia; o__Lachnospirales; f__Lachnospiraceae; g__Acetatifactor; s__unclassified_Acetatifactor
ASV1177	0	0	54	0	k__Bacteria; p__Bacteroidota; c__Bacteroidia; o__Bacteroidales; f__Muribaculaceae; g__unclassified_Muribaculaceae; s__unclassified_Muribaculaceae
ASV1178	0	24	18	12	k__Bacteria; p__Firmicutes; c__Clostridia; o__Oscillospirales; f__Oscillospiraceae; g__Oscillibacter; s__unclassified_Oscillibacter
ASV1179	0	1	0	0	k__Bacteria; p__Patescibacteria; c__Saccharimonadia; o__Saccharimonadales; f__Saccharimonadaceae; g__Candidatus_Saccharimonas; s__unclassified_Candidatus_Saccharimonas
ASV1180	0	62	15	6	k__Bacteria; p__Firmicutes; c__Clostridia; o__Clostridia_vadinBB60_group; f__unclassified_Clostridia_vadinBB60_group; g__unclassified_Clostridia_vadinBB60_group; s__unclassified_Clostridia_vadinBB60_group
ASV1181	0	17	0	21	k__Bacteria; p__Firmicutes; c__Clostridia; o__Lachnospirales; f__Lachnospiraceae; g__unclassified_Lachnospiraceae; s__unclassified_Lachnospiraceae
ASV1182	38	77	0	0	k__Bacteria; p__Firmicutes; c__Clostridia; o__Clostridia_UCG_014; f__unclassified_Clostridia_UCG_014; g__unclassified_Clostridia_UCG_014; s__unclassified_Clostridia_UCG_014
ASV1184	27	12	14	39	k__Bacteria; p__Firmicutes; c__Clostridia; o__Oscillospirales; f__Ruminococcaceae; g__Harryflintia; s__unclassified_Harryflintia
ASV1185	0	37	0	0	k__Bacteria; p__Patescibacteria; c__Saccharimonadia; o__Saccharimonadales; f__Saccharimonadaceae; g__Candidatus_Saccharimonas; s__unclassified_Candidatus_Saccharimonas
ASV1186	0	0	30	4	k__Bacteria; p__Firmicutes; c__Clostridia; o__Oscillospirales; f__Hungateiclostridiaceae; g__unclassified_Hungateiclostridiaceae; s__unclassified_Hungateiclostridiaceae
ASV1188	0	44	7	0	k__Bacteria; p__Firmicutes; c__Clostridia; o__Lachnospirales; f__Lachnospiraceae; g__unclassified_Lachnospiraceae; s__unclassified_Lachnospiraceae
ASV1190	0	4	0	0	k__Bacteria; p__Proteobacteria; c__Gammaproteobacteria; o__Pseudomonadales; f__Moraxellaceae; g__Acinetobacter; s__unclassified_Acinetobacter
ASV1191	3	137	38	0	k__Bacteria; p__Firmicutes; c__Clostridia; o__Oscillospirales; f__Oscillospiraceae; g__Colidextribacter; s__unclassified_Colidextribacter
ASV1195	0	33	12	0	k__Bacteria; p__Firmicutes; c__Clostridia; o__Lachnospirales; f__Lachnospiraceae; g__unclassified_Lachnospiraceae; s__unclassified_Lachnospiraceae
ASV1196	76	44	0	0	k__Bacteria; p__Firmicutes; c__Clostridia; o__Oscillospirales; f__Oscillospiraceae; g__unclassified_Oscillospiraceae; s__unclassified_Oscillospiraceae
ASV1197	0	162	146	0	k__Bacteria; p__Firmicutes; c__Clostridia; o__Lachnospirales; f__Lachnospiraceae; g__unclassified_Lachnospiraceae; s__unclassified_Lachnospiraceae
ASV1200	183	0	0	0	k__Bacteria; p__Bacteroidota; c__Bacteroidia; o__Bacteroidales; f__Tannerellaceae; g__Parabacteroides; s__Parabacteroides_merdae
ASV1201	0	190	114	0	k__Bacteria; p__Firmicutes; c__Clostridia; o__Oscillospirales; f__Oscillospiraceae; g__unclassified_Oscillospiraceae; s__unclassified_Oscillospiraceae
ASV1202	19	24	0	40	k__Bacteria; p__Firmicutes; c__Clostridia; o__Oscillospirales; f__[Clostridium]_methylpentosum_group; g__unclassified_[Clostridium]_methylpentosum_group; s__unclassified_[Clostridium]_methylpentosum_group
ASV1203	0	0	23	0	k__Bacteria; p__Firmicutes; c__Clostridia; o__Oscillospirales; f__Oscillospiraceae; g__unclassified_Oscillospiraceae; s__unclassified_Oscillospiraceae
ASV1204	16	73	17	27	k__Bacteria; p__Firmicutes; c__Clostridia; o__Lachnospirales; f__Lachnospiraceae; g__unclassified_Lachnospiraceae; s__unclassified_Lachnospiraceae
ASV1205	0	35	0	5	k__Bacteria; p__Firmicutes; c__Clostridia; o__Oscillospirales; f__Oscillospiraceae; g__unclassified_Oscillospiraceae; s__unclassified_Oscillospiraceae
ASV1206	40	0	30	27	k__Bacteria; p__Firmicutes; c__Clostridia; o__Oscillospirales; f__Oscillospiraceae; g__Colidextribacter; s__unclassified_Colidextribacter
ASV1207	0	0	68	0	k__Bacteria; p__Firmicutes; c__Clostridia; o__Oscillospirales; f__Oscillospiraceae; g__Intestinimonas; s__unclassified_Intestinimonas
ASV1208	297	0	0	0	k__Bacteria; p__Firmicutes; c__Clostridia; o__Clostridia_UCG_014; f__unclassified_Clostridia_UCG_014; g__unclassified_Clostridia_UCG_014; s__unclassified_Clostridia_UCG_014
ASV1209	0	111	0	0	k__Bacteria; p__Firmicutes; c__Clostridia; o__Lachnospirales; f__Lachnospiraceae; g__unclassified_Lachnospiraceae; s__unclassified_Lachnospiraceae
ASV1210	34	0	0	24	k__Bacteria; p__Firmicutes; c__Clostridia; o__Oscillospirales; f__Oscillospiraceae; g__Colidextribacter; s__unclassified_Colidextribacter
ASV1211	0	25	41	0	k__Bacteria; p__Proteobacteria; c__Gammaproteobacteria; o__Enterobacterales; f__Vibrionaceae; g__Vibrio; s__unclassified_Vibrio
ASV1212	3	0	29	7	k__Bacteria; p__Firmicutes; c__Clostridia; o__Oscillospirales; f__Ruminococcaceae; g__unclassified_Ruminococcaceae; s__unclassified_Ruminococcaceae
ASV1213	4	19	10	7	k__Bacteria; p__Desulfobacterota; c__Desulfovibrionia; o__Desulfovibrionales; f__Desulfovibrionaceae; g__Desulfovibrio; s__unclassified_Desulfovibrio
ASV1214	0	11	0	18	k__Bacteria; p__Firmicutes; c__Clostridia; o__Oscillospirales; f__UCG_010; g__unclassified_UCG_010; s__unclassified_UCG_010
ASV1215	0	55	181	0	k__Bacteria; p__Firmicutes; c__Clostridia; o__Clostridia_UCG_014; f__unclassified_Clostridia_UCG_014; g__unclassified_Clostridia_UCG_014; s__unclassified_Clostridia_UCG_014
ASV1217	0	4	13	33	k__Bacteria; p__Firmicutes; c__Clostridia; o__Lachnospirales; f__Lachnospiraceae; g__unclassified_Lachnospiraceae; s__unclassified_Lachnospiraceae
ASV1218	45	0	16	26	k__Bacteria; p__Firmicutes; c__Clostridia; o__Oscillospirales; f__Oscillospiraceae; g__unclassified_Oscillospiraceae; s__unclassified_Oscillospiraceae
ASV1219	11	0	0	0	k__Bacteria; p__Firmicutes; c__Clostridia; o__Lachnospirales; f__Lachnospiraceae; g__Sellimonas; s__unclassified_Sellimonas
ASV1220	0	30	57	0	k__Bacteria; p__Firmicutes; c__Clostridia; o__Lachnospirales; f__Lachnospiraceae; g__ASF356; s__unclassified_ASF356
ASV1223	0	0	8	0	k__Bacteria; p__Firmicutes; c__Clostridia; o__Oscillospirales; f__Oscillospiraceae; g__unclassified_Oscillospiraceae; s__unclassified_Oscillospiraceae
ASV1224	0	0	0	22	k__Bacteria; p__Firmicutes; c__Clostridia; o__Clostridia_UCG_014; f__unclassified_Clostridia_UCG_014; g__unclassified_Clostridia_UCG_014; s__unclassified_Clostridia_UCG_014
ASV1226	11	0	0	0	k__Bacteria; p__Proteobacteria; c__Alphaproteobacteria; o__Rhodospirillales; f__unclassified_Rhodospirillales; g__Azospirillum_sp._47_25; s__unclassified_Rhodospirillales
ASV1227	0	0	0	3	k__Bacteria; p__Bacteroidota; c__Bacteroidia; o__Bacteroidales; f__Muribaculaceae; g__uncultured_Bacteroidales_bacterium; s__uncultured_Bacteroidales_bacterium
ASV1230	11	6	0	17	k__Bacteria; p__Firmicutes; c__Clostridia; o__Oscillospirales; f__Oscillospiraceae; g__UCG_005; s__unclassified_UCG_005
ASV1231	42	0	11	0	k__Bacteria; p__Firmicutes; c__Clostridia; o__Clostridia_UCG_014; f__unclassified_Clostridia_UCG_014; g__unclassified_Clostridia_UCG_014; s__unclassified_Clostridia_UCG_014
ASV1233	14	0	0	0	k__Bacteria; p__Firmicutes; c__Clostridia; o__Lachnospirales; f__Lachnospiraceae; g__[Eubacterium]_fissicatena_group; s__unclassified_[Eubacterium]_fissicatena_group
ASV1234	102	0	0	0	k__Bacteria; p__Firmicutes; c__Clostridia; o__Clostridia_UCG_014; f__unclassified_Clostridia_UCG_014; g__unclassified_Clostridia_UCG_014; s__unclassified_Clostridia_UCG_014
ASV1235	7	0	23	0	k__Bacteria; p__Firmicutes; c__Clostridia; o__Oscillospirales; f__Ruminococcaceae; g__unclassified_Ruminococcaceae; s__unclassified_Ruminococcaceae
ASV1236	0	0	4	0	k__Bacteria; p__Firmicutes; c__Clostridia; o__Lachnospirales; f__Lachnospiraceae; g__unclassified_Lachnospiraceae; s__unclassified_Lachnospiraceae
ASV1237	89	0	0	0	k__Bacteria; p__Firmicutes; c__Clostridia; o__Clostridia_vadinBB60_group; f__unclassified_Clostridia_vadinBB60_group; g__unclassified_Clostridia_vadinBB60_group; s__unclassified_Clostridia_vadinBB60_group
ASV1239	0	43	61	0	k__Bacteria; p__Firmicutes; c__Clostridia; o__Lachnospirales; f__Lachnospiraceae; g__ASF356; s__unclassified_ASF356
ASV1241	0	28	0	0	k__Bacteria; p__Firmicutes; c__Clostridia; o__Lachnospirales; f__Lachnospiraceae; g__Lachnoclostridium; s__unclassified_Lachnoclostridium
ASV1242	11	67	0	0	k__Bacteria; p__Firmicutes; c__Clostridia; o__Lachnospirales; f__Lachnospiraceae; g__GCA_900066575; s__unclassified_GCA_900066575
ASV1244	0	52	0	0	k__Bacteria; p__Firmicutes; c__Clostridia; o__Oscillospirales; f__Oscillospiraceae; g__unclassified_Oscillospiraceae; s__unclassified_Oscillospiraceae
ASV1245	0	0	0	105	k__Bacteria; p__Firmicutes; c__Clostridia; o__Clostridia_UCG_014; f__unclassified_Clostridia_UCG_014; g__unclassified_Clostridia_UCG_014; s__unclassified_Clostridia_UCG_014
ASV1246	0	0	0	27	k__Bacteria; p__Firmicutes; c__Clostridia; o__Lachnospirales; f__Lachnospiraceae; g__Roseburia; s__uncultured_Clostridiales_bacterium
ASV1247	25	0	0	28	k__Bacteria; p__Firmicutes; c__Clostridia; o__Oscillospirales; f__Ruminococcaceae; g__unclassified_Ruminococcaceae; s__unclassified_Ruminococcaceae
ASV1248	0	0	0	61	k__Bacteria; p__Bacteroidota; c__Bacteroidia; o__Bacteroidales; f__Muribaculaceae; g__uncultured_Bacteroidales_bacterium; s__uncultured_Bacteroidales_bacterium
ASV1249	0	1	0	0	k__Bacteria; p__Firmicutes; c__Clostridia; o__Lachnospirales; f__Lachnospiraceae; g__unclassified_Lachnospiraceae; s__unclassified_Lachnospiraceae
ASV1252	0	0	11	27	k__Bacteria; p__Firmicutes; c__Clostridia; o__Lachnospirales; f__Lachnospiraceae; g__unclassified_Lachnospiraceae; s__unclassified_Lachnospiraceae
ASV1253	0	21	0	65	k__Bacteria; p__Firmicutes; c__Clostridia; o__Clostridia_vadinBB60_group; f__uncultured_Clostridiales_bacterium; g__uncultured_Clostridiales_bacterium; s__uncultured_Clostridiales_bacterium
ASV1254	0	0	0	54	k__Bacteria; p__Firmicutes; c__Bacilli; o__Erysipelotrichales; f__Erysipelotrichaceae; g__unclassified_Erysipelotrichaceae; s__unclassified_Erysipelotrichaceae
ASV1255	0	0	0	25	k__Bacteria; p__Bacteroidota; c__Bacteroidia; o__Bacteroidales; f__Muribaculaceae; g__uncultured_Bacteroidales_bacterium; s__uncultured_Bacteroidales_bacterium
ASV1256	53	160	0	0	k__Bacteria; p__Firmicutes; c__Clostridia; o__Lachnospirales; f__Lachnospiraceae; g__unclassified_Lachnospiraceae; s__unclassified_Lachnospiraceae
ASV1258	17	0	0	0	k__Bacteria; p__Firmicutes; c__Clostridia; o__Oscillospirales; f__Oscillospiraceae; g__unclassified_Oscillospiraceae; s__unclassified_Oscillospiraceae
ASV1259	0	7	0	0	k__Bacteria; p__Firmicutes; c__Bacilli; o__Lactobacillales; f__Enterococcaceae; g__Enterococcus; s__unclassified_Enterococcus
ASV1260	0	62	12	16	k__Bacteria; p__Firmicutes; c__Clostridia; o__Oscillospirales; f__Ruminococcaceae; g__Paludicola; s__unclassified_Paludicola
ASV1262	0	0	7	0	k__Bacteria; p__Firmicutes; c__Clostridia; o__Lachnospirales; f__Lachnospiraceae; g__GCA_900066575; s__unclassified_GCA_900066575
ASV1263	1	2	0	0	k__Bacteria; p__Firmicutes; c__Clostridia; o__Eubacteriales; f__Anaerofustaceae; g__Anaerofustis; s__Anaerofustis_stercorihominis
ASV1264	0	6	20	0	k__Bacteria; p__Bacteroidota; c__Bacteroidia; o__Bacteroidales; f__Muribaculaceae; g__unclassified_Muribaculaceae; s__unclassified_Muribaculaceae
ASV1265	0	0	90	0	k__Bacteria; p__Proteobacteria; c__Gammaproteobacteria; o__Pseudomonadales; f__Moraxellaceae; g__Acinetobacter; s__unclassified_Acinetobacter
ASV1267	16	0	1	5	k__Bacteria; p__Firmicutes; c__Incertae_Sedis; o__DTU014; f__unclassified_DTU014; g__unclassified_DTU014; s__unclassified_DTU014
ASV1268	0	0	0	54	k__Bacteria; p__Firmicutes; c__Clostridia; o__Clostridia_vadinBB60_group; f__unclassified_Clostridia_vadinBB60_group; g__unclassified_Clostridia_vadinBB60_group; s__unclassified_Clostridia_vadinBB60_group
ASV1269	5	0	0	0	k__Bacteria; p__Proteobacteria; c__Gammaproteobacteria; o__Burkholderiales; f__Alcaligenaceae; g__Paenalcaligenes; s__unclassified_Paenalcaligenes
ASV1270	0	0	0	8	k__Bacteria; p__Firmicutes; c__Clostridia; o__Oscillospirales; f__Butyricicoccaceae; g__Butyricicoccus; s__unclassified_Butyricicoccus
ASV1271	60	0	0	0	k__Bacteria; p__Firmicutes; c__Clostridia; o__Clostridia_UCG_014; f__unclassified_Clostridia_UCG_014; g__unclassified_Clostridia_UCG_014; s__unclassified_Clostridia_UCG_014
ASV1272	0	0	0	51	k__Bacteria; p__Firmicutes; c__Clostridia; o__Lachnospirales; f__Lachnospiraceae; g__Lachnospiraceae_NK4A136_group; s__unclassified_Lachnospiraceae_NK4A136_group
ASV1273	0	1	1	0	k__Bacteria; p__Proteobacteria; c__Gammaproteobacteria; o__Burkholderiales; f__Methylophilaceae; g__Methylophilus; s__unclassified_Methylophilus
ASV1274	0	87	0	163	k__Bacteria; p__Firmicutes; c__Clostridia; o__Clostridia_UCG_014; f__unclassified_Clostridia_UCG_014; g__unclassified_Clostridia_UCG_014; s__unclassified_Clostridia_UCG_014
ASV1275	0	0	0	71	k__Bacteria; p__Bacteroidota; c__Bacteroidia; o__Bacteroidales; f__Muribaculaceae; g__unclassified_Muribaculaceae; s__unclassified_Muribaculaceae
ASV1278	7	11	45	13	k__Bacteria; p__Firmicutes; c__Clostridia; o__Oscillospirales; f__Oscillospiraceae; g__unclassified_Oscillospiraceae; s__unclassified_Oscillospiraceae
ASV1280	0	0	0	145	k__Bacteria; p__Firmicutes; c__Clostridia; o__Clostridia_UCG_014; f__unclassified_Clostridia_UCG_014; g__unclassified_Clostridia_UCG_014; s__unclassified_Clostridia_UCG_014
ASV1282	15	0	3	0	k__Bacteria; p__Bacteroidota; c__Bacteroidia; o__Bacteroidales; f__Rikenellaceae; g__Alistipes; s__unclassified_Alistipes
ASV1283	0	39	81	29	k__Bacteria; p__Firmicutes; c__Clostridia; o__Oscillospirales; f__Oscillospiraceae; g__Oscillibacter; s__unclassified_Oscillibacter
ASV1285	0	26	0	0	k__Bacteria; p__Firmicutes; c__Clostridia; o__Oscillospirales; f__Oscillospiraceae; g__unclassified_Oscillospiraceae; s__unclassified_Oscillospiraceae
ASV1286	0	41	0	0	k__Bacteria; p__Bacteroidota; c__Bacteroidia; o__Bacteroidales; f__Muribaculaceae; g__unclassified_Muribaculaceae; s__unclassified_Muribaculaceae
ASV1287	0	124	0	0	k__Bacteria; p__Firmicutes; c__Clostridia; o__Lachnospirales; f__Lachnospiraceae; g__Lachnospiraceae_NK4A136_group; s__unclassified_Lachnospiraceae_NK4A136_group
ASV1292	13	0	0	0	k__Bacteria; p__Proteobacteria; c__Alphaproteobacteria; o__Rhodospirillales; f__unclassified_Rhodospirillales; g__Azospirillum_sp._47_25; s__unclassified_Rhodospirillales
ASV1293	0	0	14	0	k__Bacteria; p__Firmicutes; c__Clostridia; o__Clostridia_UCG_014; f__unclassified_Clostridia_UCG_014; g__unclassified_Clostridia_UCG_014; s__unclassified_Clostridia_UCG_014
ASV1295	10	57	22	0	k__Bacteria; p__Firmicutes; c__Clostridia; o__Oscillospirales; f__Oscillospiraceae; g__unclassified_Oscillospiraceae; s__unclassified_Oscillospiraceae
ASV1296	0	48	0	15	k__Bacteria; p__Firmicutes; c__Clostridia; o__Oscillospirales; f__Ruminococcaceae; g__unclassified_Ruminococcaceae; s__unclassified_Ruminococcaceae
ASV1299	0	25	0	61	k__Bacteria; p__Firmicutes; c__Clostridia; o__Oscillospirales; f__Oscillospiraceae; g__unclassified_Oscillospiraceae; s__unclassified_Oscillospiraceae
ASV1301	86	19	6	13	k__Bacteria; p__Bacteroidota; c__Bacteroidia; o__Bacteroidales; f__Rikenellaceae; g__Alistipes; s__Alistipes_indistinctus
ASV1302	245	0	0	0	k__Bacteria; p__Firmicutes; c__Clostridia; o__Clostridia_vadinBB60_group; f__uncultured_Clostridia_bacterium; g__uncultured_Clostridia_bacterium; s__uncultured_Clostridia_bacterium
ASV1306	0	30	18	0	k__Bacteria; p__Firmicutes; c__Clostridia; o__Peptococcales; f__Peptococcaceae; g__unclassified_Peptococcaceae; s__unclassified_Peptococcaceae
ASV1308	4	0	0	0	k__Bacteria; p__Bacteroidota; c__Bacteroidia; o__Bacteroidales; f__Tannerellaceae; g__Parabacteroides; s__unclassified_Parabacteroides
ASV1310	0	34	28	17	k__Bacteria; p__Firmicutes; c__Clostridia; o__Oscillospirales; f__Oscillospiraceae; g__unclassified_Oscillospiraceae; s__unclassified_Oscillospiraceae
ASV1311	4	33	68	3	k__Bacteria; p__Firmicutes; c__Clostridia; o__Lachnospirales; f__Lachnospiraceae; g__unclassified_Lachnospiraceae; s__unclassified_Lachnospiraceae
ASV1313	0	0	106	0	k__Bacteria; p__Firmicutes; c__Clostridia; o__Oscillospirales; f__Ruminococcaceae; g__Incertae_Sedis; s__unclassified_Incertae_Sedis
ASV1314	0	0	2	0	k__Bacteria; p__Proteobacteria; c__Gammaproteobacteria; o__Pseudomonadales; f__Moraxellaceae; g__Enhydrobacter; s__unclassified_Enhydrobacter
ASV1316	101	0	0	0	k__Bacteria; p__Firmicutes; c__Clostridia; o__Oscillospirales; f__Oscillospiraceae; g__unclassified_Oscillospiraceae; s__unclassified_Oscillospiraceae
ASV1317	14	11	0	21	k__Bacteria; p__Actinobacteriota; c__Actinobacteria; o__Corynebacteriales; f__Corynebacteriaceae; g__unclassified_Corynebacteriaceae; s__unclassified_Corynebacteriaceae
ASV1318	36	46	22	0	k__Bacteria; p__Firmicutes; c__Clostridia; o__Oscillospirales; f__Oscillospiraceae; g__UCG_005; s__unclassified_UCG_005
ASV1319	0	0	25	0	k__Bacteria; p__Firmicutes; c__Clostridia; o__Lachnospirales; f__Lachnospiraceae; g__Roseburia; s__unclassified_Roseburia
ASV1320	0	0	1	0	k__Bacteria; p__Firmicutes; c__Negativicutes; o__Veillonellales_Selenomonadales; f__Veillonellaceae; g__Veillonella; s__unclassified_Veillonella
ASV1323	0	0	211	0	k__Bacteria; p__Proteobacteria; c__Gammaproteobacteria; o__Enterobacterales; f__Enterobacteriaceae; g__unclassified_Enterobacteriaceae; s__unclassified_Enterobacteriaceae
ASV1324	0	0	7	0	k__Bacteria; p__Firmicutes; c__Clostridia; o__Lachnospirales; f__Lachnospiraceae; g__Acetatifactor; s__unclassified_Acetatifactor
ASV1326	30	11	5	43	k__Bacteria; p__Firmicutes; c__Clostridia; o__Oscillospirales; f__UCG_010; g__unclassified_UCG_010; s__unclassified_UCG_010
ASV1327	0	0	0	52	k__Bacteria; p__Firmicutes; c__Clostridia; o__Oscillospirales; f__Oscillospiraceae; g__Colidextribacter; s__unclassified_Colidextribacter
ASV1329	37	0	0	66	k__Bacteria; p__Firmicutes; c__Clostridia; o__Clostridia_UCG_014; f__unclassified_Clostridia_UCG_014; g__unclassified_Clostridia_UCG_014; s__unclassified_Clostridia_UCG_014
ASV1330	8	0	0	0	k__Bacteria; p__Firmicutes; c__Clostridia; o__Clostridia_UCG_014; f__uncultured_Clostridiales_bacterium; g__uncultured_Clostridiales_bacterium; s__uncultured_Clostridiales_bacterium
ASV1333	0	37	0	0	k__Bacteria; p__Firmicutes; c__Clostridia; o__Clostridia_UCG_014; f__unclassified_Clostridia_UCG_014; g__unclassified_Clostridia_UCG_014; s__unclassified_Clostridia_UCG_014
ASV1335	0	0	0	10	k__Bacteria; p__Firmicutes; c__Clostridia; o__Lachnospirales; f__Lachnospiraceae; g__Lachnospiraceae_NK4A136_group; s__unclassified_Lachnospiraceae_NK4A136_group
ASV1337	56	61	0	0	k__Bacteria; p__Firmicutes; c__Clostridia; o__Oscillospirales; f__unclassified_Oscillospirales; g__unclassified_Oscillospirales; s__unclassified_Oscillospirales
ASV1341	28	0	29	0	k__Bacteria; p__Bacteroidota; c__Bacteroidia; o__Bacteroidales; f__Muribaculaceae; g__unclassified_Muribaculaceae; s__unclassified_Muribaculaceae
ASV1351	186	38	0	0	k__Bacteria; p__Firmicutes; c__Clostridia; o__Lachnospirales; f__Lachnospiraceae; g__Lachnospiraceae_NK4A136_group; s__unclassified_Lachnospiraceae_NK4A136_group
ASV1352	0	0	10	0	k__Bacteria; p__Firmicutes; c__Clostridia; o__Oscillospirales; f__Oscillospiraceae; g__Oscillibacter; s__unclassified_Oscillibacter
ASV1353	3	22	0	9	k__Bacteria; p__Firmicutes; c__Clostridia; o__Oscillospirales; f__Ruminococcaceae; g__unclassified_Ruminococcaceae; s__unclassified_Ruminococcaceae
ASV1354	20	0	1	0	k__Bacteria; p__Firmicutes; c__Clostridia; o__Oscillospirales; f__Oscillospiraceae; g__Colidextribacter; s__unclassified_Colidextribacter
ASV1355	76	39	0	0	k__Bacteria; p__Firmicutes; c__Clostridia; o__Lachnospirales; f__Lachnospiraceae; g__unclassified_Lachnospiraceae; s__unclassified_Lachnospiraceae
ASV1356	26	21	0	0	k__Bacteria; p__Firmicutes; c__Clostridia; o__Lachnospirales; f__Lachnospiraceae; g__unclassified_Lachnospiraceae; s__unclassified_Lachnospiraceae
ASV1357	0	7	0	0	k__Bacteria; p__Firmicutes; c__Clostridia; o__Lachnospirales; f__Defluviitaleaceae; g__Defluviitaleaceae_UCG_011; s__unclassified_Defluviitaleaceae_UCG_011
ASV1358	0	75	28	0	k__Bacteria; p__Firmicutes; c__Clostridia; o__Lachnospirales; f__Lachnospiraceae; g__Tyzzerella; s__uncultured_rumen_bacterium
ASV1360	32	32	0	0	k__Bacteria; p__Firmicutes; c__Clostridia; o__Oscillospirales; f__Ruminococcaceae; g__unclassified_Ruminococcaceae; s__unclassified_Ruminococcaceae
ASV1361	220	0	0	0	k__Bacteria; p__Firmicutes; c__Clostridia; o__Clostridia_UCG_014; f__unclassified_Clostridia_UCG_014; g__unclassified_Clostridia_UCG_014; s__unclassified_Clostridia_UCG_014
ASV1362	2	49	24	4	k__Bacteria; p__Firmicutes; c__Bacilli; o__RF39; f__unclassified_RF39; g__unclassified_RF39; s__unclassified_RF39
ASV1363	0	35	0	0	k__Bacteria; p__Firmicutes; c__Clostridia; o__Lachnospirales; f__Lachnospiraceae; g__unclassified_Lachnospiraceae; s__unclassified_Lachnospiraceae
ASV1364	8	30	3	0	k__Bacteria; p__Firmicutes; c__Clostridia; o__Oscillospirales; f__Oscillospiraceae; g__Colidextribacter; s__unclassified_Colidextribacter
ASV1365	41	42	0	0	k__Bacteria; p__Cyanobacteria; c__Vampirivibrionia; o__Gastranaerophilales; f__unclassified_Gastranaerophilales; g__unclassified_Gastranaerophilales; s__unclassified_Gastranaerophilales
ASV1369	0	0	0	21	k__Bacteria; p__Firmicutes; c__Clostridia; o__Lachnospirales; f__Lachnospiraceae; g__[Eubacterium]_xylanophilum_group; s__unclassified_[Eubacterium]_xylanophilum_group
ASV1370	33	0	0	8	k__Bacteria; p__Cyanobacteria; c__Vampirivibrionia; o__Gastranaerophilales; f__unclassified_Gastranaerophilales; g__unclassified_Gastranaerophilales; s__unclassified_Gastranaerophilales
ASV1372	0	0	0	35	k__Bacteria; p__Firmicutes; c__Clostridia; o__Lachnospirales; f__Lachnospiraceae; g__unclassified_Lachnospiraceae; s__unclassified_Lachnospiraceae
ASV1373	0	0	0	83	k__Bacteria; p__Firmicutes; c__Clostridia; o__Clostridia_UCG_014; f__unclassified_Clostridia_UCG_014; g__unclassified_Clostridia_UCG_014; s__unclassified_Clostridia_UCG_014
ASV1375	16	0	0	0	k__Bacteria; p__Bacteroidota; c__Bacteroidia; o__Bacteroidales; f__Muribaculaceae; g__uncultured_Bacteroidales_bacterium; s__uncultured_Bacteroidales_bacterium
ASV1376	0	0	41	20	k__Bacteria; p__Bacteroidota; c__Bacteroidia; o__Bacteroidales; f__Muribaculaceae; g__uncultured_Bacteroidales_bacterium; s__uncultured_Bacteroidales_bacterium
ASV1379	0	17	0	0	k__Bacteria; p__Firmicutes; c__Clostridia; o__Lachnospirales; f__Lachnospiraceae; g__Blautia; s__unclassified_Blautia
ASV1381	0	0	0	22	k__Bacteria; p__Firmicutes; c__Clostridia; o__Lachnospirales; f__Lachnospiraceae; g__Lachnospiraceae_NK4A136_group; s__unclassified_Lachnospiraceae_NK4A136_group
ASV1382	0	120	0	0	k__Bacteria; p__Firmicutes; c__Clostridia; o__Oscillospirales; f__Oscillospiraceae; g__Oscillibacter; s__unclassified_Oscillibacter
ASV1383	0	0	0	76	k__Bacteria; p__Bacteroidota; c__Bacteroidia; o__Bacteroidales; f__Muribaculaceae; g__unclassified_Muribaculaceae; s__unclassified_Muribaculaceae
ASV1386	210	0	0	0	k__Bacteria; p__Firmicutes; c__Clostridia; o__Lachnospirales; f__Lachnospiraceae; g__unclassified_Lachnospiraceae; s__unclassified_Lachnospiraceae
ASV1389	0	0	0	2	k__Bacteria; p__Firmicutes; c__Clostridia; o__Clostridia_vadinBB60_group; f__uncultured_Clostridiales_bacterium; g__uncultured_Clostridiales_bacterium; s__uncultured_Clostridiales_bacterium
ASV1391	6	47	0	0	k__Bacteria; p__Firmicutes; c__Clostridia; o__Lachnospirales; f__Lachnospiraceae; g__unclassified_Lachnospiraceae; s__unclassified_Lachnospiraceae
ASV1392	66	0	0	16	k__Bacteria; p__Firmicutes; c__Clostridia; o__Clostridia_vadinBB60_group; f__uncultured_Clostridiales_bacterium; g__uncultured_Clostridiales_bacterium; s__uncultured_Clostridiales_bacterium
ASV1393	0	0	0	33	k__Bacteria; p__Firmicutes; c__Clostridia; o__Oscillospirales; f__Oscillospiraceae; g__unclassified_Oscillospiraceae; s__unclassified_Oscillospiraceae
ASV1394	187	0	0	0	k__Bacteria; p__Firmicutes; c__Clostridia; o__Clostridia_UCG_014; f__unclassified_Clostridia_UCG_014; g__unclassified_Clostridia_UCG_014; s__unclassified_Clostridia_UCG_014
ASV1402	1	2	13	24	k__Bacteria; p__Bacteroidota; c__Bacteroidia; o__Bacteroidales; f__Bacteroidaceae; g__Bacteroides; s__unclassified_Bacteroides
ASV1403	37	31	0	0	k__Bacteria; p__Firmicutes; c__Clostridia; o__Lachnospirales; f__Lachnospiraceae; g__Lachnospiraceae_NK4A136_group; s__unclassified_Lachnospiraceae_NK4A136_group
ASV1404	0	0	43	0	k__Bacteria; p__Firmicutes; c__Clostridia; o__Clostridiales; f__Clostridiaceae; g__Clostridium_sensu_stricto_1; s__unclassified_Clostridium_sensu_stricto_1
ASV1405	0	33	0	14	k__Bacteria; p__Firmicutes; c__Clostridia; o__Lachnospirales; f__Lachnospiraceae; g__Blautia; s__unclassified_Blautia
ASV1406	110	0	0	0	k__Bacteria; p__Firmicutes; c__Bacilli; o__Lactobacillales; f__Carnobacteriaceae; g__Atopostipes; s__unclassified_Atopostipes
ASV1408	133	0	0	0	k__Bacteria; p__Firmicutes; c__Bacilli; o__Bacillales; f__Bacillaceae; g__unclassified_Bacillaceae; s__unclassified_Bacillaceae
ASV1410	0	52	0	0	k__Bacteria; p__Firmicutes; c__Clostridia; o__Oscillospirales; f__Oscillospiraceae; g__unclassified_Oscillospiraceae; s__unclassified_Oscillospiraceae
ASV1411	0	36	0	0	k__Bacteria; p__Firmicutes; c__Clostridia; o__Lachnospirales; f__Lachnospiraceae; g__unclassified_Lachnospiraceae; s__unclassified_Lachnospiraceae
ASV1414	6	7	0	33	k__Bacteria; p__Firmicutes; c__Clostridia; o__Lachnospirales; f__Lachnospiraceae; g__unclassified_Lachnospiraceae; s__unclassified_Lachnospiraceae
ASV1415	25	20	0	4	k__Bacteria; p__Bacteroidota; c__Bacteroidia; o__Bacteroidales; f__Muribaculaceae; g__unclassified_Muribaculaceae; s__unclassified_Muribaculaceae
ASV1418	6	72	13	14	k__Bacteria; p__Firmicutes; c__Clostridia; o__Christensenellales; f__Christensenellaceae; g__unclassified_Christensenellaceae; s__unclassified_Christensenellaceae
ASV1420	0	0	0	54	k__Bacteria; p__Bacteroidota; c__Bacteroidia; o__Bacteroidales; f__Muribaculaceae; g__uncultured_Bacteroidales_bacterium; s__uncultured_Bacteroidales_bacterium
ASV1421	27	0	35	6	k__Bacteria; p__Actinobacteriota; c__Coriobacteriia; o__Coriobacteriales; f__Atopobiaceae; g__unclassified_Atopobiaceae; s__unclassified_Atopobiaceae
ASV1422	0	0	13	40	k__Bacteria; p__Firmicutes; c__Bacilli; o__RF39; f__uncultured_Firmicutes_bacterium; g__uncultured_Firmicutes_bacterium; s__uncultured_Firmicutes_bacterium
ASV1425	0	0	30	0	k__Bacteria; p__Firmicutes; c__Bacilli; o__Erysipelotrichales; f__Erysipelatoclostridiaceae; g__Erysipelatoclostridium; s__unclassified_Erysipelatoclostridium
ASV1426	75	0	0	0	k__Bacteria; p__Bacteroidota; c__Bacteroidia; o__Bacteroidales; f__Muribaculaceae; g__unclassified_Muribaculaceae; s__unclassified_Muribaculaceae
ASV1427	0	4	8	0	Unassigned; Unassigned; Unassigned; Unassigned; Unassigned; Unassigned; Unassigned
ASV1428	0	48	0	8	k__Bacteria; p__Firmicutes; c__Bacilli; o__RF39; f__uncultured_rumen_bacterium; g__uncultured_rumen_bacterium; s__uncultured_rumen_bacterium
ASV1430	0	23	109	0	k__Bacteria; p__Firmicutes; c__Clostridia; o__Lachnospirales; f__Lachnospiraceae; g__unclassified_Lachnospiraceae; s__unclassified_Lachnospiraceae
ASV1432	0	0	0	11	k__Bacteria; p__Firmicutes; c__Clostridia; o__Oscillospirales; f__Oscillospiraceae; g__unclassified_Oscillospiraceae; s__unclassified_Oscillospiraceae
ASV1433	0	0	0	6	k__Bacteria; p__Firmicutes; c__Clostridia; o__Clostridia_vadinBB60_group; f__unclassified_Clostridia_vadinBB60_group; g__unclassified_Clostridia_vadinBB60_group; s__unclassified_Clostridia_vadinBB60_group
ASV1434	0	0	0	72	k__Bacteria; p__Actinobacteriota; c__Coriobacteriia; o__Coriobacteriales; f__Eggerthellaceae; g__Enterorhabdus; s__unclassified_Enterorhabdus
ASV1436	0	84	0	0	k__Bacteria; p__Firmicutes; c__Clostridia; o__Clostridia_UCG_014; f__unclassified_Clostridia_UCG_014; g__unclassified_Clostridia_UCG_014; s__unclassified_Clostridia_UCG_014
ASV1437	0	10	33	0	k__Bacteria; p__Firmicutes; c__Clostridia; o__Lachnospirales; f__Lachnospiraceae; g__unclassified_Lachnospiraceae; s__unclassified_Lachnospiraceae
ASV1438	0	115	0	0	k__Bacteria; p__Firmicutes; c__Clostridia; o__Clostridia_UCG_014; f__unclassified_Clostridia_UCG_014; g__unclassified_Clostridia_UCG_014; s__unclassified_Clostridia_UCG_014
ASV1440	0	0	27	0	k__Bacteria; p__Firmicutes; c__Clostridia; o__Lachnospirales; f__Lachnospiraceae; g__ASF356; s__unclassified_ASF356
ASV1441	2	0	0	0	k__Bacteria; p__Firmicutes; c__Clostridia; o__Oscillospirales; f__Oscillospiraceae; g__unclassified_Oscillospiraceae; s__unclassified_Oscillospiraceae
ASV1442	69	0	2	0	k__Bacteria; p__Bacteroidota; c__Bacteroidia; o__Bacteroidales; f__Muribaculaceae; g__unclassified_Muribaculaceae; s__unclassified_Muribaculaceae
ASV1446	0	36	0	0	k__Bacteria; p__Firmicutes; c__Clostridia; o__Lachnospirales; f__Lachnospiraceae; g__unclassified_Lachnospiraceae; s__unclassified_Lachnospiraceae
ASV1448	74	0	0	0	k__Bacteria; p__Proteobacteria; c__Gammaproteobacteria; o__Burkholderiales; f__Alcaligenaceae; g__Paenalcaligenes; s__unclassified_Paenalcaligenes
ASV1449	0	16	0	0	k__Bacteria; p__Firmicutes; c__Clostridia; o__Oscillospirales; f__Oscillospiraceae; g__Colidextribacter; s__unclassified_Colidextribacter
ASV1454	3	0	17	6	k__Bacteria; p__Bacteroidota; c__Bacteroidia; o__Bacteroidales; f__Tannerellaceae; g__Parabacteroides; s__unclassified_Parabacteroides
ASV1458	0	0	8	0	k__Bacteria; p__Firmicutes; c__Clostridia; o__Oscillospirales; f__UCG_010; g__uncultured_rumen_bacterium; s__uncultured_rumen_bacterium
ASV1459	84	20	4	5	k__Bacteria; p__Firmicutes; c__Clostridia; o__Clostridia_vadinBB60_group; f__unclassified_Clostridia_vadinBB60_group; g__unclassified_Clostridia_vadinBB60_group; s__unclassified_Clostridia_vadinBB60_group
ASV1461	51	7	4	24	k__Bacteria; p__Bacteroidota; c__Bacteroidia; o__Bacteroidales; f__Bacteroidaceae; g__Bacteroides; s__unclassified_Bacteroides
ASV1462	0	0	2	0	k__Bacteria; p__Firmicutes; c__Clostridia; o__Lachnospirales; f__Lachnospiraceae; g__Roseburia; s__Clostridium_sp._Clone_44
ASV1463	0	0	55	0	k__Bacteria; p__Firmicutes; c__Clostridia; o__Lachnospirales; f__Lachnospiraceae; g__unclassified_Lachnospiraceae; s__unclassified_Lachnospiraceae
ASV1465	0	0	0	6	k__Bacteria; p__Firmicutes; c__Clostridia; o__Oscillospirales; f__Oscillospiraceae; g__Colidextribacter; s__unclassified_Colidextribacter
ASV1466	0	12	27	0	k__Bacteria; p__Bacteroidota; c__Bacteroidia; o__Bacteroidales; f__Rikenellaceae; g__Alistipes; s__unclassified_Alistipes
ASV1467	31	28	0	0	k__Bacteria; p__Bacteroidota; c__Bacteroidia; o__Bacteroidales; f__Tannerellaceae; g__Parabacteroides; s__Parabacteroides_goldsteinii
ASV1470	4	1	22	19	k__Bacteria; p__Firmicutes; c__Clostridia; o__Lachnospirales; f__Lachnospiraceae; g__GCA_900066575; s__unclassified_GCA_900066575
ASV1471	25	0	0	7	k__Bacteria; p__Firmicutes; c__Clostridia; o__unclassified_Clostridia; f__unclassified_Clostridia; g__unclassified_Clostridia; s__unclassified_Clostridia
ASV1474	20	0	0	0	k__Bacteria; p__Actinobacteriota; c__Coriobacteriia; o__Coriobacteriales; f__Atopobiaceae; g__Coriobacteriaceae_UCG_002; s__unclassified_Coriobacteriaceae_UCG_002
ASV1475	0	16	0	0	k__Bacteria; p__Firmicutes; c__Clostridia; o__Lachnospirales; f__Lachnospiraceae; g__ASF356; s__unclassified_ASF356
ASV1476	48	40	0	0	k__Bacteria; p__Firmicutes; c__Clostridia; o__Lachnospirales; f__Lachnospiraceae; g__Lachnospiraceae_FCS020_group; s__unclassified_Lachnospiraceae_FCS020_group
ASV1477	10	0	0	16	k__Bacteria; p__Proteobacteria; c__Alphaproteobacteria; o__Rhodospirillales; f__unclassified_Rhodospirillales; g__unclassified_Rhodospirillales; s__unclassified_Rhodospirillales
ASV1480	0	0	45	0	k__Bacteria; p__Bacteroidota; c__Bacteroidia; o__Bacteroidales; f__Muribaculaceae; g__uncultured_Bacteroidales_bacterium; s__uncultured_Bacteroidales_bacterium
ASV1484	0	1	0	7	k__Bacteria; p__Firmicutes; c__Clostridia; o__Peptococcales; f__Peptococcaceae; g__unclassified_Peptococcaceae; s__unclassified_Peptococcaceae
ASV1485	0	49	0	42	k__Bacteria; p__Firmicutes; c__Clostridia; o__Clostridia_UCG_014; f__unclassified_Clostridia_UCG_014; g__unclassified_Clostridia_UCG_014; s__unclassified_Clostridia_UCG_014
ASV1488	0	0	0	176	k__Bacteria; p__Firmicutes; c__Clostridia; o__Lachnospirales; f__Lachnospiraceae; g__unclassified_Lachnospiraceae; s__unclassified_Lachnospiraceae
ASV1490	30	14	0	5	k__Bacteria; p__Firmicutes; c__Clostridia; o__unclassified_Clostridia; f__unclassified_Clostridia; g__unclassified_Clostridia; s__unclassified_Clostridia
ASV1491	0	0	0	6	k__Bacteria; p__Firmicutes; c__Clostridia; o__Oscillospirales; f__Oscillospiraceae; g__Colidextribacter; s__unclassified_Colidextribacter
ASV1492	0	11	14	0	k__Bacteria; p__Firmicutes; c__Clostridia; o__Oscillospirales; f__Oscillospiraceae; g__unclassified_Oscillospiraceae; s__unclassified_Oscillospiraceae
ASV1494	123	0	0	0	k__Bacteria; p__Firmicutes; c__Clostridia; o__Oscillospirales; f__Oscillospiraceae; g__Intestinimonas; s__unclassified_Intestinimonas
ASV1497	20	0	0	44	k__Bacteria; p__Firmicutes; c__Clostridia; o__Oscillospirales; f__Ruminococcaceae; g__Incertae_Sedis; s__unclassified_Incertae_Sedis
ASV1498	0	27	21	0	k__Bacteria; p__Firmicutes; c__Clostridia; o__Lachnospirales; f__Lachnospiraceae; g__Lachnospiraceae_FCS020_group; s__unclassified_Lachnospiraceae_FCS020_group
ASV1499	0	0	0	17	k__Bacteria; p__Firmicutes; c__Clostridia; o__Oscillospirales; f__Ruminococcaceae; g__unclassified_Ruminococcaceae; s__unclassified_Ruminococcaceae
ASV1501	1	5	0	0	k__Bacteria; p__Actinobacteriota; c__Coriobacteriia; o__Coriobacteriales; f__Eggerthellaceae; g__Enterorhabdus; s__unclassified_Enterorhabdus
ASV1502	7	0	52	0	k__Bacteria; p__Firmicutes; c__Clostridia; o__Christensenellales; f__Christensenellaceae; g__Christensenellaceae_R_7_group; s__unclassified_Christensenellaceae_R_7_group
ASV1504	0	0	0	87	k__Bacteria; p__Firmicutes; c__Clostridia; o__Clostridia_UCG_014; f__uncultured_Firmicutes_bacterium; g__uncultured_Firmicutes_bacterium; s__uncultured_Firmicutes_bacterium
ASV1505	3	9	5	38	k__Bacteria; p__Firmicutes; c__Clostridia; o__Oscillospirales; f__UCG_010; g__uncultured_rumen_bacterium; s__uncultured_rumen_bacterium
ASV1506	0	0	53	0	k__Bacteria; p__Proteobacteria; c__Gammaproteobacteria; o__Enterobacterales; f__Enterobacteriaceae; g__Citrobacter; s__unclassified_Citrobacter
ASV1509	0	0	156	0	k__Bacteria; p__Firmicutes; c__Clostridia; o__Oscillospirales; f__Oscillospiraceae; g__unclassified_Oscillospiraceae; s__unclassified_Oscillospiraceae
ASV1510	0	0	0	41	k__Bacteria; p__Firmicutes; c__Clostridia; o__Lachnospirales; f__Lachnospiraceae; g__unclassified_Lachnospiraceae; s__unclassified_Lachnospiraceae
ASV1511	0	63	0	0	k__Bacteria; p__Firmicutes; c__Clostridia; o__Lachnospirales; f__Lachnospiraceae; g__unclassified_Lachnospiraceae; s__unclassified_Lachnospiraceae
ASV1513	35	0	11	0	k__Bacteria; p__Firmicutes; c__Clostridia; o__Oscillospirales; f__Oscillospiraceae; g__Intestinimonas; s__unclassified_Intestinimonas
ASV1514	0	6	1	5	k__Bacteria; p__Firmicutes; c__Clostridia; o__Lachnospirales; f__Lachnospiraceae; g__unclassified_Lachnospiraceae; s__unclassified_Lachnospiraceae
ASV1516	0	0	39	0	k__Bacteria; p__Firmicutes; c__Clostridia; o__Lachnospirales; f__Lachnospiraceae; g__unclassified_Lachnospiraceae; s__unclassified_Lachnospiraceae
ASV1517	0	64	0	0	k__Bacteria; p__Firmicutes; c__Clostridia; o__Oscillospirales; f__Oscillospiraceae; g__unclassified_Oscillospiraceae; s__unclassified_Oscillospiraceae
ASV1518	0	0	0	16	k__Bacteria; p__Firmicutes; c__Clostridia; o__Oscillospirales; f__Oscillospiraceae; g__Colidextribacter; s__unclassified_Colidextribacter
ASV1519	0	0	40	0	k__Bacteria; p__Firmicutes; c__Clostridia; o__Lachnospirales; f__Lachnospiraceae; g__Lachnospiraceae_UCG_001; s__unclassified_Lachnospiraceae_UCG_001
ASV1521	21	3	20	0	k__Bacteria; p__Bacteroidota; c__Bacteroidia; o__Bacteroidales; f__Bacteroidaceae; g__Bacteroides; s__unclassified_Bacteroides
ASV1522	0	18	2	0	k__Bacteria; p__Firmicutes; c__Clostridia; o__Peptostreptococcales_Tissierellales; f__Anaerovoracaceae; g__Family_XIII_AD3011_group; s__unclassified_Family_XIII_AD3011_group
ASV1523	0	0	0	40	k__Bacteria; p__Bacteroidota; c__Bacteroidia; o__Bacteroidales; f__Rikenellaceae; g__Alistipes; s__Alistipes_shahii
ASV1524	0	25	23	0	k__Bacteria; p__Firmicutes; c__Clostridia; o__Oscillospirales; f__Butyricicoccaceae; g__Butyricicoccus; s__unclassified_Butyricicoccus
ASV1525	0	0	0	116	k__Bacteria; p__Firmicutes; c__Clostridia; o__Clostridia_UCG_014; f__uncultured_rumen_bacterium; g__uncultured_rumen_bacterium; s__uncultured_rumen_bacterium
ASV1527	0	0	0	74	k__Bacteria; p__Firmicutes; c__Clostridia; o__Clostridia_UCG_014; f__unclassified_Clostridia_UCG_014; g__unclassified_Clostridia_UCG_014; s__unclassified_Clostridia_UCG_014
ASV1528	0	0	0	25	k__Bacteria; p__Firmicutes; c__Clostridia; o__Lachnospirales; f__Lachnospiraceae; g__unclassified_Lachnospiraceae; s__unclassified_Lachnospiraceae
ASV1530	27	0	22	21	k__Bacteria; p__Firmicutes; c__Clostridia; o__Clostridia_UCG_014; f__unclassified_Clostridia_UCG_014; g__unclassified_Clostridia_UCG_014; s__unclassified_Clostridia_UCG_014
ASV1531	0	0	0	103	k__Bacteria; p__Firmicutes; c__Clostridia; o__Clostridia_UCG_014; f__unclassified_Clostridia_UCG_014; g__unclassified_Clostridia_UCG_014; s__unclassified_Clostridia_UCG_014
ASV1533	0	0	8	0	k__Bacteria; p__Bacteroidota; c__Bacteroidia; o__Flavobacteriales; f__Weeksellaceae; g__Empedobacter; s__Empedobacter_brevis
ASV1537	0	0	0	21	k__Bacteria; p__Firmicutes; c__Clostridia; o__Lachnospirales; f__Lachnospiraceae; g__Roseburia; s__unclassified_Roseburia
ASV1538	0	0	0	27	k__Bacteria; p__Firmicutes; c__Clostridia; o__Oscillospirales; f__Ruminococcaceae; g__Anaerotruncus; s__unclassified_Anaerotruncus
ASV1539	0	39	0	0	k__Bacteria; p__Firmicutes; c__Clostridia; o__Lachnospirales; f__Lachnospiraceae; g__unclassified_Lachnospiraceae; s__unclassified_Lachnospiraceae
ASV1540	0	67	0	0	k__Bacteria; p__Firmicutes; c__Clostridia; o__Lachnospirales; f__Lachnospiraceae; g__unclassified_Lachnospiraceae; s__unclassified_Lachnospiraceae
ASV1541	0	80	32	0	k__Bacteria; p__Firmicutes; c__Clostridia; o__Clostridia_UCG_014; f__unclassified_Clostridia_UCG_014; g__unclassified_Clostridia_UCG_014; s__unclassified_Clostridia_UCG_014
ASV1542	0	0	19	38	k__Bacteria; p__Firmicutes; c__Bacilli; o__Erysipelotrichales; f__Erysipelotrichaceae; g__unclassified_Erysipelotrichaceae; s__unclassified_Erysipelotrichaceae
ASV1546	31	0	12	0	k__Bacteria; p__Firmicutes; c__Clostridia; o__Oscillospirales; f__Ruminococcaceae; g__Pygmaiobacter; s__unclassified_Pygmaiobacter
ASV1549	0	78	82	0	k__Bacteria; p__Actinobacteriota; c__Coriobacteriia; o__Coriobacteriales; f__Eggerthellaceae; g__Enterorhabdus; s__unclassified_Enterorhabdus
ASV1550	25	37	43	0	k__Bacteria; p__Firmicutes; c__Clostridia; o__Lachnospirales; f__Lachnospiraceae; g__unclassified_Lachnospiraceae; s__unclassified_Lachnospiraceae
ASV1551	0	32	0	0	k__Bacteria; p__Firmicutes; c__Clostridia; o__Clostridia_UCG_014; f__unclassified_Clostridia_UCG_014; g__unclassified_Clostridia_UCG_014; s__unclassified_Clostridia_UCG_014
ASV1552	0	26	12	0	k__Bacteria; p__Firmicutes; c__Clostridia; o__Oscillospirales; f__Ruminococcaceae; g__Harryflintia; s__Harryflintia_acetispora
ASV1555	17	53	0	0	k__Bacteria; p__Actinobacteriota; c__Coriobacteriia; o__Coriobacteriales; f__Eggerthellaceae; g__Enterorhabdus; s__unclassified_Enterorhabdus
ASV1556	0	0	159	0	k__Bacteria; p__Firmicutes; c__Clostridia; o__Clostridia_UCG_014; f__unclassified_Clostridia_UCG_014; g__unclassified_Clostridia_UCG_014; s__unclassified_Clostridia_UCG_014
ASV1557	0	0	0	23	k__Bacteria; p__Firmicutes; c__Clostridia; o__Clostridia_UCG_014; f__unclassified_Clostridia_UCG_014; g__unclassified_Clostridia_UCG_014; s__unclassified_Clostridia_UCG_014
ASV1559	0	1	0	0	k__Bacteria; p__Firmicutes; c__Clostridia; o__Peptostreptococcales_Tissierellales; f__Family_XI; g__Peptoniphilus; s__unclassified_Peptoniphilus
ASV1560	0	0	0	13	k__Bacteria; p__Bacteroidota; c__Bacteroidia; o__unclassified_Bacteroidia; f__unclassified_Bacteroidia; g__unclassified_Bacteroidia; s__unclassified_Bacteroidia
ASV1564	8	0	59	0	k__Bacteria; p__Firmicutes; c__Clostridia; o__Oscillospirales; f__Ruminococcaceae; g__unclassified_Ruminococcaceae; s__unclassified_Ruminococcaceae
ASV1566	20	18	0	0	k__Bacteria; p__Firmicutes; c__Clostridia; o__Oscillospirales; f__Ethanoligenenaceae; g__Acetanaerobacterium; s__uncultured_rumen_bacterium
ASV1570	8	21	6	0	k__Bacteria; p__Firmicutes; c__Clostridia; o__Oscillospirales; f__unclassified_Oscillospirales; g__unclassified_Oscillospirales; s__unclassified_Oscillospirales
ASV1571	0	0	4	0	k__Bacteria; p__Firmicutes; c__Bacilli; o__Erysipelotrichales; f__Erysipelotrichaceae; g__unclassified_Erysipelotrichaceae; s__unclassified_Erysipelotrichaceae
ASV1572	20	28	0	0	k__Bacteria; p__Firmicutes; c__Clostridia; o__Oscillospirales; f__Butyricicoccaceae; g__Butyricicoccus; s__unclassified_Butyricicoccus
ASV1576	0	0	45	0	k__Bacteria; p__Actinobacteriota; c__Coriobacteriia; o__Coriobacteriales; f__Eggerthellaceae; g__Enterorhabdus; s__unclassified_Enterorhabdus
ASV1577	0	0	0	6	k__Bacteria; p__Firmicutes; c__Clostridia; o__Clostridia_vadinBB60_group; f__unclassified_Clostridia_vadinBB60_group; g__unclassified_Clostridia_vadinBB60_group; s__unclassified_Clostridia_vadinBB60_group
ASV1578	0	0	0	21	k__Bacteria; p__Firmicutes; c__Clostridia; o__Lachnospirales; f__Lachnospiraceae; g__Lachnospiraceae_NK4A136_group; s__unclassified_Lachnospiraceae_NK4A136_group
ASV1579	0	42	0	0	k__Bacteria; p__Firmicutes; c__Clostridia; o__Oscillospirales; f__Ruminococcaceae; g__Incertae_Sedis; s__unclassified_Incertae_Sedis
ASV1582	0	0	0	151	k__Bacteria; p__Firmicutes; c__Clostridia; o__Clostridia_UCG_014; f__unclassified_Clostridia_UCG_014; g__unclassified_Clostridia_UCG_014; s__unclassified_Clostridia_UCG_014
ASV1586	0	0	0	69	k__Bacteria; p__Firmicutes; c__Bacilli; o__RF39; f__uncultured_rumen_bacterium; g__uncultured_rumen_bacterium; s__uncultured_rumen_bacterium
ASV1590	0	81	0	1	k__Bacteria; p__Proteobacteria; c__Gammaproteobacteria; o__Pseudomonadales; f__Moraxellaceae; g__Acinetobacter; s__unclassified_Acinetobacter
ASV1592	0	138	0	0	k__Bacteria; p__Firmicutes; c__Clostridia; o__Clostridia_UCG_014; f__unclassified_Clostridia_UCG_014; g__unclassified_Clostridia_UCG_014; s__unclassified_Clostridia_UCG_014
ASV1593	0	24	0	38	k__Bacteria; p__Firmicutes; c__Clostridia; o__Oscillospirales; f__Ruminococcaceae; g__Anaerotruncus; s__unclassified_Anaerotruncus
ASV1594	0	0	0	2	k__Bacteria; p__Firmicutes; c__Clostridia; o__Lachnospirales; f__Lachnospiraceae; g__unclassified_Lachnospiraceae; s__unclassified_Lachnospiraceae
ASV1595	0	21	0	0	k__Bacteria; p__Firmicutes; c__Clostridia; o__Oscillospirales; f__Ruminococcaceae; g__Incertae_Sedis; s__unclassified_Incertae_Sedis
ASV1596	0	0	0	46	k__Bacteria; p__Firmicutes; c__Clostridia; o__Clostridia_UCG_014; f__unclassified_Clostridia_UCG_014; g__unclassified_Clostridia_UCG_014; s__unclassified_Clostridia_UCG_014
ASV1597	8	0	0	0	k__Bacteria; p__Firmicutes; c__Clostridia; o__Oscillospirales; f__Oscillospiraceae; g__UCG_005; s__unclassified_UCG_005
ASV1600	28	12	0	0	k__Bacteria; p__Firmicutes; c__Clostridia; o__Oscillospirales; f__Oscillospiraceae; g__unclassified_Oscillospiraceae; s__unclassified_Oscillospiraceae
ASV1601	0	0	0	6	k__Bacteria; p__Firmicutes; c__Clostridia; o__Clostridia_vadinBB60_group; f__unclassified_Clostridia_vadinBB60_group; g__unclassified_Clostridia_vadinBB60_group; s__unclassified_Clostridia_vadinBB60_group
ASV1603	0	0	10	0	k__Bacteria; p__Firmicutes; c__Bacilli; o__Erysipelotrichales; f__Erysipelotrichaceae; g__unclassified_Erysipelotrichaceae; s__unclassified_Erysipelotrichaceae
ASV1604	0	103	0	42	k__Bacteria; p__Firmicutes; c__Clostridia; o__Clostridia_UCG_014; f__unclassified_Clostridia_UCG_014; g__unclassified_Clostridia_UCG_014; s__unclassified_Clostridia_UCG_014
ASV1605	0	0	145	0	k__Bacteria; p__Firmicutes; c__Clostridia; o__Lachnospirales; f__Lachnospiraceae; g__unclassified_Lachnospiraceae; s__unclassified_Lachnospiraceae
ASV1609	0	7	0	30	k__Bacteria; p__Firmicutes; c__Clostridia; o__Oscillospirales; f__Oscillospiraceae; g__UCG_005; s__unclassified_UCG_005
ASV1610	0	32	15	0	k__Bacteria; p__Firmicutes; c__Clostridia; o__Lachnospirales; f__Lachnospiraceae; g__Lachnospiraceae_FCS020_group; s__unclassified_Lachnospiraceae_FCS020_group
ASV1611	0	45	0	0	k__Bacteria; p__Firmicutes; c__Clostridia; o__Clostridia_UCG_014; f__unclassified_Clostridia_UCG_014; g__unclassified_Clostridia_UCG_014; s__unclassified_Clostridia_UCG_014
ASV1612	0	0	47	0	k__Bacteria; p__Firmicutes; c__Clostridia; o__Clostridia_UCG_014; f__uncultured_Firmicutes_bacterium; g__uncultured_Firmicutes_bacterium; s__uncultured_Firmicutes_bacterium
ASV1613	129	0	0	0	k__Bacteria; p__Firmicutes; c__Clostridia; o__Lachnospirales; f__Lachnospiraceae; g__Lachnospiraceae_NK4A136_group; s__unclassified_Lachnospiraceae_NK4A136_group
ASV1615	25	0	0	0	k__Bacteria; p__Firmicutes; c__Clostridia; o__Oscillospirales; f__Ruminococcaceae; g__unclassified_Ruminococcaceae; s__unclassified_Ruminococcaceae
ASV1617	0	0	33	0	k__Bacteria; p__Firmicutes; c__Clostridia; o__Lachnospirales; f__Lachnospiraceae; g__Roseburia; s__unclassified_Roseburia
ASV1619	0	0	0	3	k__Bacteria; p__Firmicutes; c__Clostridia; o__Lachnospirales; f__Lachnospiraceae; g__unclassified_Lachnospiraceae; s__unclassified_Lachnospiraceae
ASV1620	12	0	9	0	k__Bacteria; p__Bacteroidota; c__Bacteroidia; o__Bacteroidales; f__Muribaculaceae; g__unclassified_Muribaculaceae; s__unclassified_Muribaculaceae
ASV1622	0	0	0	13	k__Bacteria; p__Bacteroidota; c__Bacteroidia; o__Bacteroidales; f__Rikenellaceae; g__Alistipes; s__unclassified_Alistipes
ASV1626	15	45	54	0	k__Bacteria; p__Firmicutes; c__Clostridia; o__Lachnospirales; f__Lachnospiraceae; g__unclassified_Lachnospiraceae; s__unclassified_Lachnospiraceae
ASV1627	0	0	14	0	k__Bacteria; p__Firmicutes; c__Clostridia; o__Lachnospirales; f__Lachnospiraceae; g__unclassified_Lachnospiraceae; s__unclassified_Lachnospiraceae
ASV1628	10	0	7	0	k__Bacteria; p__Firmicutes; c__Clostridia; o__Oscillospirales; f__Ruminococcaceae; g__unclassified_Ruminococcaceae; s__unclassified_Ruminococcaceae
ASV1629	0	0	139	0	k__Bacteria; p__Firmicutes; c__Clostridia; o__Lachnospirales; f__Lachnospiraceae; g__unclassified_Lachnospiraceae; s__Clostridiales_bacterium_Marseille_P5551
ASV1630	38	0	0	0	k__Bacteria; p__Firmicutes; c__Clostridia; o__Clostridia_vadinBB60_group; f__unclassified_Clostridia_vadinBB60_group; g__unclassified_Clostridia_vadinBB60_group; s__unclassified_Clostridia_vadinBB60_group
ASV1632	0	0	5	0	k__Bacteria; p__Firmicutes; c__Clostridia; o__Lachnospirales; f__Lachnospiraceae; g__Lachnospiraceae_NK4A136_group; s__unclassified_Lachnospiraceae_NK4A136_group
ASV1633	0	0	10	0	k__Bacteria; p__Proteobacteria; c__Alphaproteobacteria; o__Rhodospirillales; f__unclassified_Rhodospirillales; g__unclassified_Rhodospirillales; s__unclassified_Rhodospirillales
ASV1634	0	11	0	0	k__Bacteria; p__Firmicutes; c__Clostridia; o__Oscillospirales; f__Ruminococcaceae; g__unclassified_Ruminococcaceae; s__unclassified_Ruminococcaceae
ASV1635	0	0	0	50	k__Bacteria; p__Firmicutes; c__Bacilli; o__Staphylococcales; f__Staphylococcaceae; g__Staphylococcus; s__unclassified_Staphylococcus
ASV1638	0	0	0	33	k__Bacteria; p__Firmicutes; c__Bacilli; o__Erysipelotrichales; f__Erysipelotrichaceae; g__unclassified_Erysipelotrichaceae; s__unclassified_Erysipelotrichaceae
ASV1640	0	0	14	106	k__Bacteria; p__Firmicutes; c__Clostridia; o__Clostridia_UCG_014; f__unclassified_Clostridia_UCG_014; g__unclassified_Clostridia_UCG_014; s__unclassified_Clostridia_UCG_014
ASV1641	0	0	33	0	k__Bacteria; p__Firmicutes; c__Clostridia; o__Oscillospirales; f__Ruminococcaceae; g__Incertae_Sedis; s__unclassified_Incertae_Sedis
ASV1642	19	24	0	0	k__Bacteria; p__Firmicutes; c__Clostridia; o__Clostridia_vadinBB60_group; f__unclassified_Clostridia_vadinBB60_group; g__unclassified_Clostridia_vadinBB60_group; s__unclassified_Clostridia_vadinBB60_group
ASV1643	0	0	52	0	k__Bacteria; p__Firmicutes; c__Clostridia; o__Lachnospirales; f__Lachnospiraceae; g__unclassified_Lachnospiraceae; s__unclassified_Lachnospiraceae
ASV1644	0	0	2	0	k__Bacteria; p__Firmicutes; c__Clostridia; o__Oscillospirales; f__[Eubacterium]_coprostanoligenes_group; g__unclassified_[Eubacterium]_coprostanoligenes_group; s__unclassified_[Eubacterium]_coprostanoligenes_group
ASV1645	0	0	3	0	k__Bacteria; p__Firmicutes; c__Clostridia; o__Clostridia_vadinBB60_group; f__unclassified_Clostridia_vadinBB60_group; g__unclassified_Clostridia_vadinBB60_group; s__unclassified_Clostridia_vadinBB60_group
ASV1646	98	5	27	0	k__Bacteria; p__Cyanobacteria; c__Vampirivibrionia; o__Gastranaerophilales; f__uncultured_rumen_bacterium; g__uncultured_rumen_bacterium; s__uncultured_rumen_bacterium
ASV1647	16	0	14	0	k__Bacteria; p__Firmicutes; c__Clostridia; o__Oscillospirales; f__Oscillospiraceae; g__unclassified_Oscillospiraceae; s__unclassified_Oscillospiraceae
ASV1651	0	13	0	0	k__Bacteria; p__Firmicutes; c__Clostridia; o__Clostridia_UCG_014; f__unclassified_Clostridia_UCG_014; g__unclassified_Clostridia_UCG_014; s__unclassified_Clostridia_UCG_014
ASV1654	0	0	0	98	k__Bacteria; p__Firmicutes; c__Clostridia; o__Clostridia_UCG_014; f__unclassified_Clostridia_UCG_014; g__unclassified_Clostridia_UCG_014; s__unclassified_Clostridia_UCG_014
ASV1656	100	0	0	31	k__Bacteria; p__Firmicutes; c__Clostridia; o__Clostridia_UCG_014; f__unclassified_Clostridia_UCG_014; g__unclassified_Clostridia_UCG_014; s__unclassified_Clostridia_UCG_014
ASV1658	45	0	0	0	k__Bacteria; p__Firmicutes; c__Clostridia; o__Oscillospirales; f__Oscillospiraceae; g__Colidextribacter; s__unclassified_Colidextribacter
ASV1659	0	7	0	10	k__Bacteria; p__Bacteroidota; c__Bacteroidia; o__Bacteroidales; f__Tannerellaceae; g__Parabacteroides; s__Parabacteroides_goldsteinii
ASV1660	0	0	0	4	k__Bacteria; p__Firmicutes; c__Clostridia; o__Peptostreptococcales_Tissierellales; f__Anaerovoracaceae; g__[Eubacterium]_brachy_group; s__unclassified_[Eubacterium]_brachy_group
ASV1662	0	0	0	8	k__Bacteria; p__Bacteroidota; c__Bacteroidia; o__Bacteroidales; f__Marinifilaceae; g__Butyricimonas; s__unclassified_Butyricimonas
ASV1663	1	17	10	4	k__Bacteria; p__Firmicutes; c__Clostridia; o__Lachnospirales; f__Lachnospiraceae; g__Lachnospiraceae_NK4A136_group; s__unclassified_Lachnospiraceae_NK4A136_group
ASV1664	0	0	0	9	k__Bacteria; p__Firmicutes; c__Clostridia; o__Oscillospirales; f__Butyricicoccaceae; g__UCG_009; s__unclassified_UCG_009
ASV1665	10	0	2	9	k__Bacteria; p__Actinobacteriota; c__Coriobacteriia; o__Coriobacteriales; f__Eggerthellaceae; g__Enterorhabdus; s__unclassified_Enterorhabdus
ASV1669	0	22	0	0	k__Bacteria; p__Firmicutes; c__Clostridia; o__Oscillospirales; f__Ruminococcaceae; g__Harryflintia; s__unclassified_Harryflintia
ASV1670	0	0	0	22	k__Bacteria; p__Firmicutes; c__Clostridia; o__Lachnospirales; f__Lachnospiraceae; g__GCA_900066575; s__unclassified_GCA_900066575
ASV1671	30	0	40	0	k__Bacteria; p__Firmicutes; c__Clostridia; o__Oscillospirales; f__Ruminococcaceae; g__Incertae_Sedis; s__unclassified_Incertae_Sedis
ASV1673	0	26	0	0	k__Bacteria; p__Firmicutes; c__Bacilli; o__Erysipelotrichales; f__Erysipelotrichaceae; g__unclassified_Erysipelotrichaceae; s__unclassified_Erysipelotrichaceae
ASV1683	0	0	80	0	k__Bacteria; p__Firmicutes; c__Clostridia; o__Lachnospirales; f__Lachnospiraceae; g__unclassified_Lachnospiraceae; s__unclassified_Lachnospiraceae
ASV1687	23	7	4	15	k__Bacteria; p__Bacteroidota; c__Bacteroidia; o__Bacteroidales; f__Bacteroidaceae; g__Bacteroides; s__unclassified_Bacteroides
ASV1688	39	0	0	0	k__Bacteria; p__Firmicutes; c__Clostridia; o__Clostridia_UCG_014; f__unclassified_Clostridia_UCG_014; g__unclassified_Clostridia_UCG_014; s__unclassified_Clostridia_UCG_014
ASV1690	0	10	12	8	k__Bacteria; p__Firmicutes; c__Bacilli; o__RF39; f__unclassified_RF39; g__unclassified_RF39; s__unclassified_RF39
ASV1691	0	12	0	0	k__Bacteria; p__Firmicutes; c__Clostridia; o__Clostridia_vadinBB60_group; f__unclassified_Clostridia_vadinBB60_group; g__unclassified_Clostridia_vadinBB60_group; s__unclassified_Clostridia_vadinBB60_group
ASV1692	0	110	0	0	k__Bacteria; p__Firmicutes; c__Bacilli; o__Bacillales; f__Planococcaceae; g__Kurthia; s__unclassified_Kurthia
ASV1694	0	122	0	0	k__Bacteria; p__unclassified_Bacteria; c__unclassified_Bacteria; o__unclassified_Bacteria; f__unclassified_Bacteria; g__unclassified_Bacteria; s__unclassified_Bacteria
ASV1695	6	16	6	0	k__Bacteria; p__Firmicutes; c__Clostridia; o__Lachnospirales; f__Lachnospiraceae; g__Lachnospiraceae_UCG_010; s__unclassified_Lachnospiraceae_UCG_010
ASV1696	0	1	6	12	k__Bacteria; p__Firmicutes; c__Clostridia; o__Lachnospirales; f__Lachnospiraceae; g__unclassified_Lachnospiraceae; s__unclassified_Lachnospiraceae
ASV1698	1	3	2	14	k__Bacteria; p__Firmicutes; c__Clostridia; o__Oscillospirales; f__Oscillospiraceae; g__unclassified_Oscillospiraceae; s__unclassified_Oscillospiraceae
ASV1700	36	0	0	0	k__Bacteria; p__Firmicutes; c__Clostridia; o__Lachnospirales; f__Lachnospiraceae; g__GCA_900066575; s__unclassified_GCA_900066575
ASV1701	0	21	0	0	k__Bacteria; p__Firmicutes; c__Bacilli; o__Erysipelotrichales; f__Erysipelotrichaceae; g__Faecalibaculum; s__unclassified_Faecalibaculum
ASV1702	0	18	24	0	k__Bacteria; p__Firmicutes; c__Clostridia; o__Oscillospirales; f__Oscillospiraceae; g__unclassified_Oscillospiraceae; s__unclassified_Oscillospiraceae
ASV1703	0	6	10	20	k__Bacteria; p__Firmicutes; c__Clostridia; o__Christensenellales; f__Christensenellaceae; g__unclassified_Christensenellaceae; s__unclassified_Christensenellaceae
ASV1704	15	57	0	0	k__Bacteria; p__Firmicutes; c__Clostridia; o__Peptostreptococcales_Tissierellales; f__Anaerovoracaceae; g__unclassified_Anaerovoracaceae; s__unclassified_Anaerovoracaceae
ASV1706	14	6	21	0	k__Bacteria; p__Bacteroidota; c__Bacteroidia; o__Bacteroidales; f__Bacteroidaceae; g__Bacteroides; s__unclassified_Bacteroides
ASV1707	13	0	1	0	k__Bacteria; p__Firmicutes; c__Clostridia; o__Oscillospirales; f__Oscillospiraceae; g__Intestinimonas; s__unclassified_Intestinimonas
ASV1708	0	8	0	0	k__Bacteria; p__Firmicutes; c__Bacilli; o__Lactobacillales; f__Enterococcaceae; g__Enterococcus; s__unclassified_Enterococcus
ASV1710	0	0	0	12	k__Bacteria; p__Firmicutes; c__Clostridia; o__Oscillospirales; f__Oscillospiraceae; g__unclassified_Oscillospiraceae; s__unclassified_Oscillospiraceae
ASV1711	3	8	18	25	k__Bacteria; p__Firmicutes; c__Clostridia; o__Christensenellales; f__Christensenellaceae; g__Christensenellaceae_R_7_group; s__unclassified_Christensenellaceae_R_7_group
ASV1712	30	0	0	0	k__Bacteria; p__Firmicutes; c__Clostridia; o__Lachnospirales; f__Lachnospiraceae; g__unclassified_Lachnospiraceae; s__unclassified_Lachnospiraceae
ASV1719	0	75	0	0	k__Bacteria; p__Firmicutes; c__Clostridia; o__Clostridia_UCG_014; f__uncultured_Clostridiales_bacterium; g__uncultured_Clostridiales_bacterium; s__uncultured_Clostridiales_bacterium
ASV1720	0	117	0	0	k__Bacteria; p__Firmicutes; c__Clostridia; o__Oscillospirales; f__Oscillospiraceae; g__UCG_003; s__unclassified_UCG_003
ASV1722	8	12	23	0	k__Bacteria; p__Firmicutes; c__Clostridia; o__Oscillospirales; f__UCG_010; g__uncultured_rumen_bacterium; s__uncultured_rumen_bacterium
ASV1723	0	29	0	0	k__Bacteria; p__Firmicutes; c__Clostridia; o__Lachnospirales; f__Lachnospiraceae; g__unclassified_Lachnospiraceae; s__unclassified_Lachnospiraceae
ASV1724	0	93	0	0	k__Bacteria; p__Firmicutes; c__Clostridia; o__Clostridia_UCG_014; f__unclassified_Clostridia_UCG_014; g__unclassified_Clostridia_UCG_014; s__unclassified_Clostridia_UCG_014
ASV1725	0	0	0	3	k__Bacteria; p__Firmicutes; c__Clostridia; o__Monoglobales; f__Monoglobaceae; g__Monoglobus; s__unclassified_Monoglobus
ASV1726	0	25	0	0	k__Bacteria; p__Firmicutes; c__Clostridia; o__Oscillospirales; f__Oscillospiraceae; g__UCG_005; s__unclassified_UCG_005
ASV1727	6	0	0	0	k__Bacteria; p__Bacteroidota; c__Bacteroidia; o__Bacteroidales; f__Muribaculaceae; g__unclassified_Muribaculaceae; s__unclassified_Muribaculaceae
ASV1730	0	0	0	7	k__Bacteria; p__Firmicutes; c__Clostridia; o__Lachnospirales; f__Lachnospiraceae; g__GCA_900066575; s__unclassified_GCA_900066575
ASV1732	12	10	20	7	k__Bacteria; p__Bacteroidota; c__Bacteroidia; o__Bacteroidales; f__Bacteroidaceae; g__Bacteroides; s__unclassified_Bacteroides
ASV1735	0	0	0	22	k__Bacteria; p__Firmicutes; c__Clostridia; o__Clostridia_UCG_014; f__unclassified_Clostridia_UCG_014; g__unclassified_Clostridia_UCG_014; s__unclassified_Clostridia_UCG_014
ASV1737	6	0	0	0	k__Bacteria; p__Actinobacteriota; c__Actinobacteria; o__Corynebacteriales; f__Dietziaceae; g__Dietzia; s__unclassified_Dietzia
ASV1738	12	14	28	0	k__Bacteria; p__Firmicutes; c__Clostridia; o__Oscillospirales; f__UCG_010; g__unclassified_UCG_010; s__unclassified_UCG_010
ASV1741	21	0	0	0	k__Bacteria; p__Firmicutes; c__Clostridia; o__Lachnospirales; f__Lachnospiraceae; g__unclassified_Lachnospiraceae; s__unclassified_Lachnospiraceae
ASV1742	0	0	63	22	k__Bacteria; p__Firmicutes; c__Clostridia; o__Lachnospirales; f__Lachnospiraceae; g__unclassified_Lachnospiraceae; s__unclassified_Lachnospiraceae
ASV1743	0	0	0	91	k__Bacteria; p__Firmicutes; c__Clostridia; o__Lachnospirales; f__Lachnospiraceae; g__Lachnospiraceae_NK4A136_group; s__Clostridiales_bacterium_CIEAF_020
ASV1744	68	28	0	0	k__Bacteria; p__Firmicutes; c__Clostridia; o__Oscillospirales; f__Oscillospiraceae; g__unclassified_Oscillospiraceae; s__unclassified_Oscillospiraceae
ASV1748	15	14	0	14	k__Bacteria; p__Desulfobacterota; c__Desulfovibrionia; o__Desulfovibrionales; f__Desulfovibrionaceae; g__unclassified_Desulfovibrionaceae; s__uncultured_Desulfovibrionales_bacterium
ASV1749	0	20	0	52	k__Bacteria; p__Firmicutes; c__Clostridia; o__Oscillospirales; f__[Clostridium]_methylpentosum_group; g__unclassified_[Clostridium]_methylpentosum_group; s__unclassified_[Clostridium]_methylpentosum_group
ASV1752	0	29	0	0	k__Bacteria; p__Firmicutes; c__Clostridia; o__Christensenellales; f__Christensenellaceae; g__unclassified_Christensenellaceae; s__unclassified_Christensenellaceae
ASV1753	19	0	0	0	k__Bacteria; p__Firmicutes; c__Clostridia; o__Lachnospirales; f__Lachnospiraceae; g__unclassified_Lachnospiraceae; s__unclassified_Lachnospiraceae
ASV1754	84	0	0	0	k__Bacteria; p__Actinobacteriota; c__Actinobacteria; o__Bifidobacteriales; f__Bifidobacteriaceae; g__Bifidobacterium; s__unclassified_Bifidobacterium
ASV1755	0	0	1	0	k__Bacteria; p__Firmicutes; c__Negativicutes; o__Veillonellales_Selenomonadales; f__Selenomonadaceae; g__Megamonas; s__Megamonas_funiformis
ASV1756	0	0	0	71	k__Bacteria; p__Firmicutes; c__Clostridia; o__Lachnospirales; f__Lachnospiraceae; g__Lachnospiraceae_NK4A136_group; s__unclassified_Lachnospiraceae_NK4A136_group
ASV1759	0	0	0	1	k__Bacteria; p__Firmicutes; c__Clostridia; o__Oscillospirales; f__Oscillospiraceae; g__Colidextribacter; s__unclassified_Colidextribacter
ASV1760	18	6	0	20	k__Bacteria; p__Bacteroidota; c__Bacteroidia; o__Bacteroidales; f__Bacteroidaceae; g__Bacteroides; s__unclassified_Bacteroides
ASV1761	0	46	0	0	k__Bacteria; p__Firmicutes; c__Clostridia; o__Clostridia_UCG_014; f__unclassified_Clostridia_UCG_014; g__unclassified_Clostridia_UCG_014; s__unclassified_Clostridia_UCG_014
ASV1762	0	0	0	81	k__Bacteria; p__Firmicutes; c__Clostridia; o__Lachnospirales; f__Lachnospiraceae; g__unclassified_Lachnospiraceae; s__unclassified_Lachnospiraceae
ASV1764	49	0	0	0	k__Bacteria; p__Firmicutes; c__Clostridia; o__Oscillospirales; f__Ruminococcaceae; g__Incertae_Sedis; s__unclassified_Incertae_Sedis
ASV1765	0	0	110	0	k__Bacteria; p__Firmicutes; c__Clostridia; o__Clostridia_UCG_014; f__unclassified_Clostridia_UCG_014; g__unclassified_Clostridia_UCG_014; s__unclassified_Clostridia_UCG_014
ASV1766	0	110	0	0	k__Bacteria; p__Firmicutes; c__Clostridia; o__Clostridia_UCG_014; f__unclassified_Clostridia_UCG_014; g__unclassified_Clostridia_UCG_014; s__unclassified_Clostridia_UCG_014
ASV1767	21	0	0	11	k__Bacteria; p__Firmicutes; c__Clostridia; o__Clostridia_vadinBB60_group; f__unclassified_Clostridia_vadinBB60_group; g__unclassified_Clostridia_vadinBB60_group; s__unclassified_Clostridia_vadinBB60_group
ASV1768	0	8	0	0	k__Bacteria; p__Firmicutes; c__Clostridia; o__Clostridia_UCG_014; f__unclassified_Clostridia_UCG_014; g__unclassified_Clostridia_UCG_014; s__unclassified_Clostridia_UCG_014
ASV1769	0	0	0	18	k__Bacteria; p__Bacteroidota; c__Bacteroidia; o__Bacteroidales; f__Rikenellaceae; g__Alistipes; s__unclassified_Alistipes
ASV1770	0	36	5	0	k__Bacteria; p__Firmicutes; c__Clostridia; o__Lachnospirales; f__Lachnospiraceae; g__unclassified_Lachnospiraceae; s__unclassified_Lachnospiraceae
ASV1772	0	0	0	63	k__Bacteria; p__Firmicutes; c__Clostridia; o__Clostridia_vadinBB60_group; f__unclassified_Clostridia_vadinBB60_group; g__unclassified_Clostridia_vadinBB60_group; s__unclassified_Clostridia_vadinBB60_group
ASV1776	0	7	55	0	k__Bacteria; p__Firmicutes; c__Clostridia; o__Lachnospirales; f__Lachnospiraceae; g__Tyzzerella; s__uncultured_Clostridiales_bacterium
ASV1779	0	109	0	0	k__Bacteria; p__Firmicutes; c__Bacilli; o__RF39; f__uncultured_rumen_bacterium; g__uncultured_rumen_bacterium; s__uncultured_rumen_bacterium
ASV1780	0	0	3	0	k__Bacteria; p__Firmicutes; c__Clostridia; o__Lachnospirales; f__Lachnospiraceae; g__unclassified_Lachnospiraceae; s__unclassified_Lachnospiraceae
ASV1782	0	3	0	13	k__Bacteria; p__Firmicutes; c__Clostridia; o__Lachnospirales; f__Lachnospiraceae; g__Lachnospiraceae_UCG_006; s__unclassified_Lachnospiraceae_UCG_006
ASV1783	0	0	0	108	k__Bacteria; p__Firmicutes; c__Clostridia; o__Clostridia_UCG_014; f__unclassified_Clostridia_UCG_014; g__unclassified_Clostridia_UCG_014; s__unclassified_Clostridia_UCG_014
ASV1784	0	22	0	0	k__Bacteria; p__Firmicutes; c__Clostridia; o__Lachnospirales; f__Lachnospiraceae; g__unclassified_Lachnospiraceae; s__unclassified_Lachnospiraceae
ASV1787	20	0	11	7	k__Bacteria; p__Firmicutes; c__Clostridia; o__Oscillospirales; f__Oscillospiraceae; g__NK4A214_group; s__unclassified_NK4A214_group
ASV1794	0	13	0	0	k__Bacteria; p__Firmicutes; c__Clostridia; o__Oscillospirales; f__Oscillospiraceae; g__unclassified_Oscillospiraceae; s__unclassified_Oscillospiraceae
ASV1796	5	8	50	0	k__Bacteria; p__Firmicutes; c__Clostridia; o__Lachnospirales; f__Lachnospiraceae; g__unclassified_Lachnospiraceae; s__unclassified_Lachnospiraceae
ASV1798	14	6	11	0	k__Bacteria; p__Firmicutes; c__Clostridia; o__Oscillospirales; f__Oscillospiraceae; g__unclassified_Oscillospiraceae; s__unclassified_Oscillospiraceae
ASV1799	5	4	1	4	k__Bacteria; p__Bacteroidota; c__Bacteroidia; o__Bacteroidales; f__Muribaculaceae; g__unclassified_Muribaculaceae; s__unclassified_Muribaculaceae
ASV1800	18	0	15	0	k__Bacteria; p__Firmicutes; c__Clostridia; o__Oscillospirales; f__Oscillospiraceae; g__unclassified_Oscillospiraceae; s__unclassified_Oscillospiraceae
ASV1802	0	19	18	0	k__Bacteria; p__Proteobacteria; c__Gammaproteobacteria; o__Enterobacterales; f__Vibrionaceae; g__Vibrio; s__unclassified_Vibrio
ASV1803	0	0	16	5	k__Bacteria; p__Firmicutes; c__Clostridia; o__Oscillospirales; f__Oscillospiraceae; g__unclassified_Oscillospiraceae; s__unclassified_Oscillospiraceae
ASV1804	0	19	12	48	k__Bacteria; p__Firmicutes; c__Bacilli; o__Erysipelotrichales; f__Erysipelotrichaceae; g__unclassified_Erysipelotrichaceae; s__unclassified_Erysipelotrichaceae
ASV1811	75	0	0	0	k__Bacteria; p__Firmicutes; c__Clostridia; o__Clostridia_UCG_014; f__unclassified_Clostridia_UCG_014; g__unclassified_Clostridia_UCG_014; s__unclassified_Clostridia_UCG_014
ASV1814	0	0	16	0	k__Bacteria; p__Firmicutes; c__Clostridia; o__Lachnospirales; f__Lachnospiraceae; g__unclassified_Lachnospiraceae; s__unclassified_Lachnospiraceae
ASV1815	0	15	0	0	k__Bacteria; p__Firmicutes; c__Clostridia; o__Clostridia_vadinBB60_group; f__unclassified_Clostridia_vadinBB60_group; g__unclassified_Clostridia_vadinBB60_group; s__unclassified_Clostridia_vadinBB60_group
ASV1816	7	6	0	0	k__Bacteria; p__Firmicutes; c__Bacilli; o__Erysipelotrichales; f__Erysipelatoclostridiaceae; g__Erysipelatoclostridium; s__unclassified_Erysipelatoclostridium
ASV1820	0	39	0	0	k__Bacteria; p__Firmicutes; c__Clostridia; o__Oscillospirales; f__Ruminococcaceae; g__Incertae_Sedis; s__unclassified_Incertae_Sedis
ASV1823	0	0	0	10	k__Bacteria; p__Actinobacteriota; c__Actinobacteria; o__Bifidobacteriales; f__Bifidobacteriaceae; g__Bifidobacterium; s__unclassified_Bifidobacterium
ASV1825	69	33	0	0	k__Bacteria; p__Firmicutes; c__Clostridia; o__Clostridia_UCG_014; f__unclassified_Clostridia_UCG_014; g__unclassified_Clostridia_UCG_014; s__unclassified_Clostridia_UCG_014
ASV1826	0	0	102	0	k__Bacteria; p__Bacteroidota; c__Bacteroidia; o__Bacteroidales; f__Rikenellaceae; g__Alistipes; s__Alistipes_shahii
ASV1827	0	0	0	1	k__Bacteria; p__Firmicutes; c__Clostridia; o__Lachnospirales; f__Lachnospiraceae; g__unclassified_Lachnospiraceae; s__unclassified_Lachnospiraceae
ASV1828	0	0	0	19	k__Bacteria; p__Firmicutes; c__Clostridia; o__Oscillospirales; f__Ruminococcaceae; g__Incertae_Sedis; s__unclassified_Incertae_Sedis
ASV1832	0	11	28	0	k__Bacteria; p__Firmicutes; c__Clostridia; o__Lachnospirales; f__Lachnospiraceae; g__unclassified_Lachnospiraceae; s__unclassified_Lachnospiraceae
ASV1835	8	8	0	12	k__Bacteria; p__Bacteroidota; c__Bacteroidia; o__Bacteroidales; f__Muribaculaceae; g__unclassified_Muribaculaceae; s__unclassified_Muribaculaceae
ASV1841	10	53	0	0	k__Bacteria; p__Firmicutes; c__Clostridia; o__Oscillospirales; f__Ruminococcaceae; g__[Eubacterium]_siraeum_group; s__unclassified_[Eubacterium]_siraeum_group
ASV1843	0	0	0	8	k__Bacteria; p__Firmicutes; c__Clostridia; o__Lachnospirales; f__Lachnospiraceae; g__Lachnospiraceae_NK4A136_group; s__unclassified_Lachnospiraceae_NK4A136_group
ASV1844	0	0	0	22	k__Bacteria; p__Bacteroidota; c__Bacteroidia; o__Bacteroidales; f__Muribaculaceae; g__unclassified_Muribaculaceae; s__unclassified_Muribaculaceae
ASV1845	5	29	0	9	k__Bacteria; p__Firmicutes; c__Clostridia; o__Oscillospirales; f__Ruminococcaceae; g__unclassified_Ruminococcaceae; s__unclassified_Ruminococcaceae
ASV1847	93	3	0	0	k__Bacteria; p__Firmicutes; c__Clostridia; o__Lachnospirales; f__Lachnospiraceae; g__unclassified_Lachnospiraceae; s__Clostridium_sp._Culture_54
ASV1848	1	14	1	5	k__Bacteria; p__Deferribacterota; c__Deferribacteres; o__Deferribacterales; f__Deferribacteraceae; g__Mucispirillum; s__unclassified_Mucispirillum
ASV1849	0	0	0	17	k__Bacteria; p__Firmicutes; c__Clostridia; o__Oscillospirales; f__Ruminococcaceae; g__Incertae_Sedis; s__unclassified_Incertae_Sedis
ASV1850	0	0	0	7	k__Bacteria; p__Actinobacteriota; c__Coriobacteriia; o__Coriobacteriales; f__Eggerthellaceae; g__Enterorhabdus; s__unclassified_Enterorhabdus
ASV1853	0	0	35	0	k__Bacteria; p__Firmicutes; c__Clostridia; o__Lachnospirales; f__Lachnospiraceae; g__unclassified_Lachnospiraceae; s__unclassified_Lachnospiraceae
ASV1854	0	0	48	0	k__Bacteria; p__Firmicutes; c__Clostridia; o__Clostridia_UCG_014; f__unclassified_Clostridia_UCG_014; g__unclassified_Clostridia_UCG_014; s__unclassified_Clostridia_UCG_014
ASV1857	23	18	10	0	k__Bacteria; p__Firmicutes; c__Clostridia; o__Oscillospirales; f__Oscillospiraceae; g__Oscillibacter; s__unclassified_Oscillibacter
ASV1863	0	6	0	0	k__Bacteria; p__Firmicutes; c__Clostridia; o__Clostridia_vadinBB60_group; f__uncultured_Clostridiales_bacterium; g__uncultured_Clostridiales_bacterium; s__uncultured_Clostridiales_bacterium
ASV1866	0	0	10	0	k__Bacteria; p__Firmicutes; c__Clostridia; o__Lachnospirales; f__Lachnospiraceae; g__A2; s__unclassified_A2
ASV1867	0	0	0	1	k__Bacteria; p__Firmicutes; c__Clostridia; o__Lachnospirales; f__Lachnospiraceae; g__unclassified_Lachnospiraceae; s__unclassified_Lachnospiraceae
ASV1868	1	0	7	23	k__Bacteria; p__Firmicutes; c__Clostridia; o__Peptococcales; f__Peptococcaceae; g__unclassified_Peptococcaceae; s__unclassified_Peptococcaceae
ASV1869	0	0	0	1	k__Bacteria; p__Firmicutes; c__Clostridia; o__Peptostreptococcales_Tissierellales; f__Anaerovoracaceae; g__[Eubacterium]_brachy_group; s__unclassified_[Eubacterium]_brachy_group
ASV1872	0	1	0	17	k__Bacteria; p__Firmicutes; c__Clostridia; o__Oscillospirales; f__UCG_010; g__unclassified_UCG_010; s__unclassified_UCG_010
ASV1873	0	0	0	10	k__Bacteria; p__Firmicutes; c__Bacilli; o__Lactobacillales; f__Aerococcaceae; g__Facklamia; s__unclassified_Facklamia
ASV1874	48	0	12	0	k__Bacteria; p__Firmicutes; c__Clostridia; o__Oscillospirales; f__Oscillospiraceae; g__unclassified_Oscillospiraceae; s__unclassified_Oscillospiraceae
ASV1876	0	28	0	0	k__Bacteria; p__Firmicutes; c__Clostridia; o__Lachnospirales; f__Lachnospiraceae; g__A2; s__unclassified_A2
ASV1879	0	0	52	0	k__Bacteria; p__Firmicutes; c__Clostridia; o__Clostridia_UCG_014; f__unclassified_Clostridia_UCG_014; g__unclassified_Clostridia_UCG_014; s__unclassified_Clostridia_UCG_014
ASV1882	0	0	6	0	k__Bacteria; p__Firmicutes; c__Clostridia; o__Oscillospirales; f__Oscillospiraceae; g__unclassified_Oscillospiraceae; s__unclassified_Oscillospiraceae
ASV1883	15	0	0	0	k__Bacteria; p__Firmicutes; c__Clostridia; o__Lachnospirales; f__Lachnospiraceae; g__unclassified_Lachnospiraceae; s__unclassified_Lachnospiraceae
ASV1887	0	24	0	1	k__Bacteria; p__Firmicutes; c__Clostridia; o__Oscillospirales; f__Ruminococcaceae; g__Incertae_Sedis; s__unclassified_Incertae_Sedis
ASV1889	91	0	0	0	k__Bacteria; p__Firmicutes; c__Bacilli; o__Bacillales; f__Planococcaceae; g__Sporosarcina; s__unclassified_Sporosarcina
ASV1891	0	0	23	0	k__Bacteria; p__Firmicutes; c__Clostridia; o__Lachnospirales; f__Lachnospiraceae; g__Lachnospiraceae_NK4A136_group; s__unclassified_Lachnospiraceae_NK4A136_group
ASV1893	0	0	0	20	k__Bacteria; p__Firmicutes; c__Clostridia; o__Oscillospirales; f__Oscillospiraceae; g__unclassified_Oscillospiraceae; s__unclassified_Oscillospiraceae
ASV1896	0	0	0	52	k__Bacteria; p__Firmicutes; c__Clostridia; o__Oscillospirales; f__Oscillospiraceae; g__unclassified_Oscillospiraceae; s__unclassified_Oscillospiraceae
ASV1898	18	0	0	0	k__Bacteria; p__Firmicutes; c__Clostridia; o__Clostridia_vadinBB60_group; f__unclassified_Clostridia_vadinBB60_group; g__unclassified_Clostridia_vadinBB60_group; s__unclassified_Clostridia_vadinBB60_group
ASV1900	0	1	0	0	k__Bacteria; p__Firmicutes; c__Clostridia; o__Lachnospirales; f__Lachnospiraceae; g__unclassified_Lachnospiraceae; s__unclassified_Lachnospiraceae
ASV1903	30	0	0	0	k__Bacteria; p__Firmicutes; c__Clostridia; o__Oscillospirales; f__UCG_010; g__unclassified_UCG_010; s__unclassified_UCG_010
ASV1905	0	0	1	0	k__Bacteria; p__Firmicutes; c__Clostridia; o__Peptostreptococcales_Tissierellales; f__Peptostreptococcaceae; g__Peptostreptococcus; s__unclassified_Peptostreptococcus
ASV1906	0	0	1	0	k__Bacteria; p__Firmicutes; c__Clostridia; o__Oscillospirales; f__Oscillospiraceae; g__unclassified_Oscillospiraceae; s__unclassified_Oscillospiraceae
ASV1907	0	13	0	0	k__Bacteria; p__Firmicutes; c__Clostridia; o__Oscillospirales; f__Ruminococcaceae; g__Anaerotruncus; s__unclassified_Anaerotruncus
ASV1908	0	0	31	0	k__Bacteria; p__Firmicutes; c__Clostridia; o__Lachnospirales; f__Lachnospiraceae; g__ASF356; s__unclassified_ASF356
ASV1909	0	0	0	14	k__Bacteria; p__Actinobacteriota; c__Actinobacteria; o__Bifidobacteriales; f__Bifidobacteriaceae; g__Bifidobacterium; s__unclassified_Bifidobacterium
ASV1910	0	0	0	6	k__Bacteria; p__Firmicutes; c__Clostridia; o__Lachnospirales; f__Lachnospiraceae; g__ASF356; s__unclassified_ASF356
ASV1911	7	0	0	0	k__Bacteria; p__Firmicutes; c__Clostridia; o__Oscillospirales; f__Oscillospiraceae; g__unclassified_Oscillospiraceae; s__unclassified_Oscillospiraceae
ASV1917	1	24	0	0	k__Bacteria; p__Firmicutes; c__Clostridia; o__Oscillospirales; f__Oscillospiraceae; g__UCG_005; s__unclassified_UCG_005
ASV1918	0	0	0	27	k__Bacteria; p__Bacteroidota; c__Bacteroidia; o__Bacteroidales; f__Muribaculaceae; g__unclassified_Muribaculaceae; s__unclassified_Muribaculaceae
ASV1919	0	0	0	25	k__Bacteria; p__Cyanobacteria; c__Vampirivibrionia; o__Gastranaerophilales; f__unclassified_Gastranaerophilales; g__unclassified_Gastranaerophilales; s__unclassified_Gastranaerophilales
ASV1920	0	0	15	0	k__Bacteria; p__Firmicutes; c__Clostridia; o__Peptostreptococcales_Tissierellales; f__Anaerovoracaceae; g__Anaerovorax; s__unclassified_Anaerovorax
ASV1928	4	4	9	10	k__Bacteria; p__Firmicutes; c__Clostridia; o__Oscillospirales; f__Ruminococcaceae; g__Caproiciproducens; s__unclassified_Caproiciproducens
ASV1933	9	23	7	0	k__Bacteria; p__Firmicutes; c__Clostridia; o__Oscillospirales; f__Ruminococcaceae; g__unclassified_Ruminococcaceae; s__unclassified_Ruminococcaceae
ASV1934	0	88	0	0	k__Bacteria; p__Firmicutes; c__Clostridia; o__Lachnospirales; f__Lachnospiraceae; g__unclassified_Lachnospiraceae; s__unclassified_Lachnospiraceae
ASV1936	0	0	0	5	k__Bacteria; p__Bacteroidota; c__Bacteroidia; o__Bacteroidales; f__Rikenellaceae; g__Alistipes; s__unclassified_Alistipes
ASV1938	0	0	0	40	k__Bacteria; p__Bacteroidota; c__Bacteroidia; o__Bacteroidales; f__Muribaculaceae; g__unclassified_Muribaculaceae; s__unclassified_Muribaculaceae
ASV1943	0	0	0	13	k__Bacteria; p__Actinobacteriota; c__Coriobacteriia; o__Coriobacteriales; f__Eggerthellaceae; g__Enterorhabdus; s__unclassified_Enterorhabdus
ASV1944	62	0	0	0	k__Bacteria; p__Proteobacteria; c__Alphaproteobacteria; o__Rhodospirillales; f__unclassified_Rhodospirillales; g__unclassified_Rhodospirillales; s__unclassified_Rhodospirillales
ASV1947	0	0	0	86	k__Bacteria; p__Firmicutes; c__Clostridia; o__Lachnospirales; f__Lachnospiraceae; g__unclassified_Lachnospiraceae; s__unclassified_Lachnospiraceae
ASV1954	35	3	0	0	k__Bacteria; p__Firmicutes; c__Clostridia; o__Lachnospirales; f__Lachnospiraceae; g__unclassified_Lachnospiraceae; s__unclassified_Lachnospiraceae
ASV1955	0	0	32	0	k__Bacteria; p__Firmicutes; c__Clostridia; o__Lachnospirales; f__Lachnospiraceae; g__Lachnospiraceae_NK4A136_group; s__unclassified_Lachnospiraceae_NK4A136_group
ASV1956	0	19	0	26	k__Bacteria; p__Firmicutes; c__Clostridia; o__Clostridia_UCG_014; f__unclassified_Clostridia_UCG_014; g__unclassified_Clostridia_UCG_014; s__unclassified_Clostridia_UCG_014
ASV1957	1	9	1	0	k__Bacteria; p__Firmicutes; c__Clostridia; o__Lachnospirales; f__Lachnospiraceae; g__Lachnospiraceae_NK4A136_group; s__unclassified_Lachnospiraceae_NK4A136_group
ASV1958	7	0	78	0	k__Bacteria; p__Firmicutes; c__Clostridia; o__Clostridia_UCG_014; f__unclassified_Clostridia_UCG_014; g__unclassified_Clostridia_UCG_014; s__unclassified_Clostridia_UCG_014
ASV1960	3	0	0	1	k__Bacteria; p__Bacteroidota; c__Bacteroidia; o__Bacteroidales; f__Tannerellaceae; g__Parabacteroides; s__unclassified_Parabacteroides
ASV1961	0	5	0	10	k__Bacteria; p__Firmicutes; c__Clostridia; o__Oscillospirales; f__Oscillospiraceae; g__Colidextribacter; s__unclassified_Colidextribacter
ASV1963	0	40	0	0	k__Bacteria; p__Firmicutes; c__Bacilli; o__Erysipelotrichales; f__Erysipelatoclostridiaceae; g__unclassified_Erysipelatoclostridiaceae; s__unclassified_Erysipelatoclostridiaceae
ASV1964	0	0	0	21	k__Bacteria; p__Firmicutes; c__Clostridia; o__Clostridia_UCG_014; f__unclassified_Clostridia_UCG_014; g__unclassified_Clostridia_UCG_014; s__unclassified_Clostridia_UCG_014
ASV1966	0	0	32	0	k__Bacteria; p__Firmicutes; c__Clostridia; o__Clostridia_UCG_014; f__unclassified_Clostridia_UCG_014; g__unclassified_Clostridia_UCG_014; s__unclassified_Clostridia_UCG_014
ASV1969	4	0	8	0	k__Bacteria; p__Firmicutes; c__Clostridia; o__Lachnospirales; f__Lachnospiraceae; g__unclassified_Lachnospiraceae; s__unclassified_Lachnospiraceae
ASV1970	3	10	0	17	k__Bacteria; p__Firmicutes; c__Clostridia; o__Christensenellales; f__Christensenellaceae; g__Christensenellaceae_R_7_group; s__unclassified_Christensenellaceae_R_7_group
ASV1972	4	33	0	0	k__Bacteria; p__Bacteroidota; c__Bacteroidia; o__Bacteroidales; f__Marinifilaceae; g__Butyricimonas; s__unclassified_Butyricimonas
ASV1977	0	0	4	0	k__Bacteria; p__Firmicutes; c__Clostridia; o__Clostridia_vadinBB60_group; f__uncultured_Clostridiales_bacterium; g__uncultured_Clostridiales_bacterium; s__uncultured_Clostridiales_bacterium
ASV1978	0	0	2	0	k__Bacteria; p__Firmicutes; c__Clostridia; o__Clostridia_vadinBB60_group; f__uncultured_Clostridiales_bacterium; g__uncultured_Clostridiales_bacterium; s__uncultured_Clostridiales_bacterium
ASV1979	0	0	19	0	k__Bacteria; p__Firmicutes; c__Clostridia; o__Lachnospirales; f__Lachnospiraceae; g__unclassified_Lachnospiraceae; s__unclassified_Lachnospiraceae
ASV1982	0	9	0	0	k__Bacteria; p__Firmicutes; c__Clostridia; o__Christensenellales; f__Christensenellaceae; g__unclassified_Christensenellaceae; s__unclassified_Christensenellaceae
ASV1983	0	0	41	29	k__Bacteria; p__Firmicutes; c__Clostridia; o__Christensenellales; f__Christensenellaceae; g__Christensenellaceae_R_7_group; s__unclassified_Christensenellaceae_R_7_group
ASV1984	0	0	0	82	k__Bacteria; p__Firmicutes; c__Clostridia; o__Oscillospirales; f__Oscillospiraceae; g__unclassified_Oscillospiraceae; s__unclassified_Oscillospiraceae
ASV1992	0	0	82	0	k__Bacteria; p__Firmicutes; c__Clostridia; o__Clostridia_UCG_014; f__unclassified_Clostridia_UCG_014; g__unclassified_Clostridia_UCG_014; s__unclassified_Clostridia_UCG_014
ASV1993	0	0	1	0	k__Bacteria; p__Bacteroidota; c__Bacteroidia; o__Bacteroidales; f__Bacteroidaceae; g__Bacteroides; s__unclassified_Bacteroides
ASV1995	0	30	9	0	k__Bacteria; p__Firmicutes; c__Clostridia; o__Lachnospirales; f__Lachnospiraceae; g__unclassified_Lachnospiraceae; s__unclassified_Lachnospiraceae
ASV1997	0	0	1	0	k__Bacteria; p__Bacteroidota; c__Bacteroidia; o__Bacteroidales; f__Rikenellaceae; g__Alistipes; s__unclassified_Alistipes
ASV2002	0	0	0	11	k__Bacteria; p__Bacteroidota; c__Bacteroidia; o__Bacteroidales; f__Bacteroidaceae; g__Bacteroides; s__unclassified_Bacteroides
ASV2006	0	0	0	3	k__Bacteria; p__Bacteroidota; c__Bacteroidia; o__Bacteroidales; f__Rikenellaceae; g__Alistipes; s__unclassified_Alistipes
ASV2007	0	0	0	12	k__Bacteria; p__Firmicutes; c__Clostridia; o__Clostridia_vadinBB60_group; f__unclassified_Clostridia_vadinBB60_group; g__unclassified_Clostridia_vadinBB60_group; s__unclassified_Clostridia_vadinBB60_group
ASV2008	0	10	0	0	k__Bacteria; p__Firmicutes; c__Clostridia; o__Oscillospirales; f__Ruminococcaceae; g__unclassified_Ruminococcaceae; s__unclassified_Ruminococcaceae
ASV2009	18	0	0	0	k__Bacteria; p__Firmicutes; c__Clostridia; o__Oscillospirales; f__Oscillospiraceae; g__unclassified_Oscillospiraceae; s__unclassified_Oscillospiraceae
ASV2011	0	1	0	6	k__Bacteria; p__Firmicutes; c__Clostridia; o__Lachnospirales; f__Lachnospiraceae; g__unclassified_Lachnospiraceae; s__unclassified_Lachnospiraceae
ASV2013	0	4	11	0	k__Bacteria; p__Bacteroidota; c__Bacteroidia; o__Bacteroidales; f__Muribaculaceae; g__unclassified_Muribaculaceae; s__unclassified_Muribaculaceae
ASV2014	0	0	0	34	k__Bacteria; p__Firmicutes; c__Clostridia; o__Lachnospirales; f__Lachnospiraceae; g__Lachnospiraceae_NK4A136_group; s__unclassified_Lachnospiraceae_NK4A136_group
ASV2015	0	0	0	50	k__Bacteria; p__Bacteroidota; c__Bacteroidia; o__Bacteroidales; f__Muribaculaceae; g__uncultured_Bacteroidales_bacterium; s__uncultured_Bacteroidales_bacterium
ASV2027	25	27	0	0	k__Bacteria; p__Firmicutes; c__Clostridia; o__Oscillospirales; f__Ruminococcaceae; g__uncultured_Clostridiales_bacterium; s__uncultured_Clostridiales_bacterium
ASV2030	0	0	0	12	k__Bacteria; p__Firmicutes; c__Clostridia; o__Christensenellales; f__Christensenellaceae; g__unclassified_Christensenellaceae; s__unclassified_Christensenellaceae
ASV2031	0	0	0	9	k__Bacteria; p__Firmicutes; c__Clostridia; o__Lachnospirales; f__Lachnospiraceae; g__Lachnospiraceae_NK4A136_group; s__unclassified_Lachnospiraceae_NK4A136_group
ASV2035	0	0	0	10	k__Bacteria; p__Bacteroidota; c__Bacteroidia; o__Bacteroidales; f__Tannerellaceae; g__Parabacteroides; s__unclassified_Parabacteroides
ASV2037	0	0	0	19	k__Bacteria; p__Bacteroidota; c__Bacteroidia; o__Bacteroidales; f__Muribaculaceae; g__unclassified_Muribaculaceae; s__unclassified_Muribaculaceae
ASV2038	0	0	0	19	k__Bacteria; p__Firmicutes; c__Clostridia; o__Oscillospirales; f__Ruminococcaceae; g__unclassified_Ruminococcaceae; s__unclassified_Ruminococcaceae
ASV2041	0	0	8	0	k__Bacteria; p__Firmicutes; c__Clostridia; o__Lachnospirales; f__Lachnospiraceae; g__unclassified_Lachnospiraceae; s__unclassified_Lachnospiraceae
ASV2045	6	14	0	5	k__Bacteria; p__Firmicutes; c__Clostridia; o__Oscillospirales; f__Ruminococcaceae; g__unclassified_Ruminococcaceae; s__unclassified_Ruminococcaceae
ASV2047	0	0	1	11	k__Bacteria; p__Actinobacteriota; c__Coriobacteriia; o__Coriobacteriales; f__Eggerthellaceae; g__Parvibacter; s__unclassified_Parvibacter
ASV2049	0	0	0	4	k__Bacteria; p__Bacteroidota; c__Bacteroidia; o__Bacteroidales; f__Muribaculaceae; g__uncultured_Bacteroidales_bacterium; s__uncultured_Bacteroidales_bacterium
ASV2051	17	0	0	0	k__Bacteria; p__Firmicutes; c__Clostridia; o__Clostridia_UCG_014; f__unclassified_Clostridia_UCG_014; g__unclassified_Clostridia_UCG_014; s__unclassified_Clostridia_UCG_014
ASV2053	0	22	0	0	k__Bacteria; p__Firmicutes; c__Clostridia; o__Lachnospirales; f__Lachnospiraceae; g__Roseburia; s__Roseburia_intestinalis
ASV2057	0	0	22	0	k__Bacteria; p__Firmicutes; c__Clostridia; o__Peptostreptococcales_Tissierellales; f__Anaerovoracaceae; g__Family_XIII_AD3011_group; s__unclassified_Family_XIII_AD3011_group
ASV2058	0	2	10	12	k__Bacteria; p__Firmicutes; c__Clostridia; o__Lachnospirales; f__Lachnospiraceae; g__Blautia; s__unclassified_Blautia
ASV2059	46	0	0	0	k__Bacteria; p__Firmicutes; c__Bacilli; o__Lactobacillales; f__Carnobacteriaceae; g__Atopostipes; s__unclassified_Atopostipes
ASV2062	0	16	0	0	k__Bacteria; p__Firmicutes; c__Bacilli; o__Erysipelotrichales; f__Erysipelotrichaceae; g__unclassified_Erysipelotrichaceae; s__unclassified_Erysipelotrichaceae
ASV2065	0	22	0	0	k__Bacteria; p__Firmicutes; c__Bacilli; o__Staphylococcales; f__Staphylococcaceae; g__Staphylococcus; s__unclassified_Staphylococcus
ASV2066	0	0	35	0	k__Bacteria; p__Firmicutes; c__Bacilli; o__Erysipelotrichales; f__Erysipelotrichaceae; g__unclassified_Erysipelotrichaceae; s__unclassified_Erysipelotrichaceae
ASV2067	15	0	0	0	k__Bacteria; p__Firmicutes; c__Clostridia; o__Lachnospirales; f__Lachnospiraceae; g__unclassified_Lachnospiraceae; s__unclassified_Lachnospiraceae
ASV2068	0	6	5	0	k__Bacteria; p__Firmicutes; c__Clostridia; o__Oscillospirales; f__unclassified_Oscillospirales; g__unclassified_Oscillospirales; s__unclassified_Oscillospirales
ASV2069	34	0	0	0	k__Bacteria; p__Firmicutes; c__Clostridia; o__Oscillospirales; f__Butyricicoccaceae; g__Butyricicoccus; s__unclassified_Butyricicoccus
ASV2080	0	0	0	11	k__Bacteria; p__Bacteroidota; c__Bacteroidia; o__Bacteroidales; f__Rikenellaceae; g__Alistipes; s__unclassified_Alistipes
ASV2082	0	2	2	0	k__Bacteria; p__Firmicutes; c__Clostridia; o__Oscillospirales; f__Oscillospiraceae; g__NK4A214_group; s__unclassified_NK4A214_group
ASV2084	0	22	0	0	k__Bacteria; p__Firmicutes; c__Clostridia; o__Oscillospirales; f__Oscillospiraceae; g__unclassified_Oscillospiraceae; s__unclassified_Oscillospiraceae
ASV2085	0	0	0	3	k__Bacteria; p__Firmicutes; c__Bacilli; o__Lactobacillales; f__Carnobacteriaceae; g__Atopostipes; s__unclassified_Atopostipes
ASV2095	0	0	29	0	k__Bacteria; p__Firmicutes; c__Clostridia; o__Oscillospirales; f__Oscillospiraceae; g__Colidextribacter; s__unclassified_Colidextribacter
ASV2097	0	0	0	42	k__Bacteria; p__Firmicutes; c__Clostridia; o__Monoglobales; f__Monoglobaceae; g__Monoglobus; s__unclassified_Monoglobus
ASV2098	0	0	0	35	k__Bacteria; p__Firmicutes; c__Clostridia; o__Oscillospirales; f__[Eubacterium]_coprostanoligenes_group; g__unclassified_[Eubacterium]_coprostanoligenes_group; s__unclassified_[Eubacterium]_coprostanoligenes_group
ASV2099	0	0	0	71	k__Bacteria; p__Bacteroidota; c__Bacteroidia; o__Bacteroidales; f__Muribaculaceae; g__uncultured_Bacteroidales_bacterium; s__uncultured_Bacteroidales_bacterium
ASV2100	0	15	0	0	k__Bacteria; p__Firmicutes; c__Clostridia; o__Lachnospirales; f__Lachnospiraceae; g__unclassified_Lachnospiraceae; s__unclassified_Lachnospiraceae
ASV2101	11	0	0	0	k__Bacteria; p__Firmicutes; c__Clostridia; o__Oscillospirales; f__Ruminococcaceae; g__unclassified_Ruminococcaceae; s__unclassified_Ruminococcaceae
ASV2102	0	32	17	0	k__Bacteria; p__Firmicutes; c__Clostridia; o__Oscillospirales; f__UCG_010; g__unclassified_UCG_010; s__unclassified_UCG_010
ASV2106	0	0	71	0	k__Bacteria; p__Bacteroidota; c__Bacteroidia; o__Bacteroidales; f__Muribaculaceae; g__unclassified_Muribaculaceae; s__unclassified_Muribaculaceae
ASV2107	0	71	0	0	k__Bacteria; p__Bacteroidota; c__Bacteroidia; o__Bacteroidales; f__Muribaculaceae; g__unclassified_Muribaculaceae; s__unclassified_Muribaculaceae
ASV2108	0	0	1	0	k__Bacteria; p__Cyanobacteria; c__Cyanobacteriia; o__unclassified_Cyanobacteriia; f__unclassified_Cyanobacteriia; g__unclassified_Cyanobacteriia; s__unclassified_Cyanobacteriia
ASV2111	0	0	0	30	k__Bacteria; p__Firmicutes; c__Clostridia; o__Clostridia_UCG_014; f__unclassified_Clostridia_UCG_014; g__unclassified_Clostridia_UCG_014; s__unclassified_Clostridia_UCG_014
ASV2112	0	0	0	18	k__Bacteria; p__Bacteroidota; c__Bacteroidia; o__Bacteroidales; f__Muribaculaceae; g__unclassified_Muribaculaceae; s__unclassified_Muribaculaceae
ASV2115	0	0	70	0	k__Bacteria; p__Bacteroidota; c__Bacteroidia; o__Bacteroidales; f__Muribaculaceae; g__unclassified_Muribaculaceae; s__unclassified_Muribaculaceae
ASV2120	0	33	0	0	k__Bacteria; p__Firmicutes; c__Bacilli; o__Erysipelotrichales; f__Erysipelotrichaceae; g__Turicibacter; s__unclassified_Turicibacter
ASV2122	2	0	0	0	k__Bacteria; p__Bacteroidota; c__Bacteroidia; o__Bacteroidales; f__Tannerellaceae; g__Parabacteroides; s__unclassified_Parabacteroides
ASV2123	0	0	35	0	k__Bacteria; p__Firmicutes; c__Clostridia; o__Lachnospirales; f__Lachnospiraceae; g__Lachnospiraceae_FCS020_group; s__unclassified_Lachnospiraceae_FCS020_group
ASV2127	0	0	1	0	k__Bacteria; p__Proteobacteria; c__Gammaproteobacteria; o__Pseudomonadales; f__Moraxellaceae; g__Moraxella; s__unclassified_Moraxella
ASV2130	0	0	0	15	k__Bacteria; p__Firmicutes; c__Clostridia; o__Clostridia_vadinBB60_group; f__uncultured_Clostridiales_bacterium; g__uncultured_Clostridiales_bacterium; s__uncultured_Clostridiales_bacterium
ASV2134	0	0	68	0	k__Bacteria; p__Firmicutes; c__Clostridia; o__Lachnospirales; f__Lachnospiraceae; g__Lachnospiraceae_NK4A136_group; s__unclassified_Lachnospiraceae_NK4A136_group
ASV2138	9	0	11	0	k__Bacteria; p__Firmicutes; c__Clostridia; o__Oscillospirales; f__Oscillospiraceae; g__unclassified_Oscillospiraceae; s__unclassified_Oscillospiraceae
ASV2139	0	0	42	0	k__Bacteria; p__Bacteroidota; c__Bacteroidia; o__Bacteroidales; f__Marinifilaceae; g__Butyricimonas; s__unclassified_Butyricimonas
ASV2140	0	0	0	12	k__Bacteria; p__Firmicutes; c__Clostridia; o__Oscillospirales; f__Oscillospiraceae; g__UCG_005; s__uncultured_Clostridiales_bacterium
ASV2141	0	0	0	39	k__Bacteria; p__Firmicutes; c__Clostridia; o__Clostridia_UCG_014; f__unclassified_Clostridia_UCG_014; g__unclassified_Clostridia_UCG_014; s__unclassified_Clostridia_UCG_014
ASV2142	0	22	0	0	k__Bacteria; p__Firmicutes; c__Clostridia; o__Lachnospirales; f__Lachnospiraceae; g__unclassified_Lachnospiraceae; s__unclassified_Lachnospiraceae
ASV2144	7	0	0	0	k__Bacteria; p__Actinobacteriota; c__Coriobacteriia; o__Coriobacteriales; f__Eggerthellaceae; g__Enterorhabdus; s__unclassified_Enterorhabdus
ASV2146	0	0	67	0	k__Bacteria; p__Firmicutes; c__Clostridia; o__Lachnospirales; f__Lachnospiraceae; g__Lachnospiraceae_NK4A136_group; s__unclassified_Lachnospiraceae_NK4A136_group
ASV2147	0	0	67	0	k__Bacteria; p__Firmicutes; c__Clostridia; o__Oscillospirales; f__Oscillospiraceae; g__Colidextribacter; s__unclassified_Colidextribacter
ASV2149	1	0	0	0	k__Bacteria; p__Firmicutes; c__Clostridia; o__Peptostreptococcales_Tissierellales; f__Anaerovoracaceae; g__unclassified_Anaerovoracaceae; s__unclassified_Anaerovoracaceae
ASV2151	16	0	13	0	k__Bacteria; p__Firmicutes; c__Clostridia; o__Oscillospirales; f__Oscillospiraceae; g__Oscillibacter; s__unclassified_Oscillibacter
ASV2152	28	12	1	0	k__Bacteria; p__Actinobacteriota; c__Coriobacteriia; o__Coriobacteriales; f__Eggerthellaceae; g__Parvibacter; s__unclassified_Parvibacter
ASV2153	60	0	0	0	k__Bacteria; p__Firmicutes; c__Bacilli; o__Lactobacillales; f__Carnobacteriaceae; g__Atopostipes; s__unclassified_Atopostipes
ASV2154	0	0	0	26	k__Bacteria; p__Firmicutes; c__Bacilli; o__RF39; f__unclassified_RF39; g__unclassified_RF39; s__unclassified_RF39
ASV2155	0	0	2	0	k__Bacteria; p__Firmicutes; c__Clostridia; o__Lachnospirales; f__Lachnospiraceae; g__Lachnospiraceae_NK4A136_group; s__unclassified_Lachnospiraceae_NK4A136_group
ASV2159	0	42	0	0	k__Bacteria; p__Firmicutes; c__Clostridia; o__Clostridia_UCG_014; f__unclassified_Clostridia_UCG_014; g__unclassified_Clostridia_UCG_014; s__unclassified_Clostridia_UCG_014
ASV2162	0	0	0	1	k__Bacteria; p__Bacteroidota; c__Bacteroidia; o__Bacteroidales; f__Rikenellaceae; g__Alistipes; s__unclassified_Alistipes
ASV2163	1	4	0	5	k__Bacteria; p__Firmicutes; c__Clostridia; o__Oscillospirales; f__Oscillospiraceae; g__UCG_005; s__unclassified_UCG_005
ASV2164	0	1	0	0	k__Bacteria; p__Cyanobacteria; c__Cyanobacteriia; o__Cyanobacteriales; f__unclassified_Cyanobacteriales; g__unclassified_Cyanobacteriales; s__unclassified_Cyanobacteriales
ASV2165	2	0	3	1	k__Bacteria; p__Firmicutes; c__Bacilli; o__Erysipelotrichales; f__Erysipelotrichaceae; g__Dubosiella; s__Firmicutes_bacterium_M10_2
ASV2166	0	14	0	0	k__Bacteria; p__Firmicutes; c__Clostridia; o__Lachnospirales; f__Lachnospiraceae; g__unclassified_Lachnospiraceae; s__unclassified_Lachnospiraceae
ASV2170	0	0	65	0	k__Bacteria; p__Bacteroidota; c__Bacteroidia; o__Bacteroidales; f__Rikenellaceae; g__Alistipes; s__Alistipes_shahii
ASV2172	0	15	0	0	k__Bacteria; p__Firmicutes; c__Clostridia; o__Christensenellales; f__Christensenellaceae; g__Christensenellaceae_R_7_group; s__unclassified_Christensenellaceae_R_7_group
ASV2178	0	0	20	0	k__Bacteria; p__Bacteroidota; c__Bacteroidia; o__Bacteroidales; f__Muribaculaceae; g__unclassified_Muribaculaceae; s__unclassified_Muribaculaceae
ASV2181	0	2	0	0	k__Bacteria; p__Proteobacteria; c__Gammaproteobacteria; o__Pseudomonadales; f__Pseudomonadaceae; g__Pseudomonas; s__unclassified_Pseudomonas
ASV2182	0	0	1	0	k__Bacteria; p__Proteobacteria; c__Gammaproteobacteria; o__Burkholderiales; f__Neisseriaceae; g__unclassified_Neisseriaceae; s__unclassified_Neisseriaceae
ASV2184	0	0	26	0	k__Bacteria; p__Firmicutes; c__Clostridia; o__Clostridia_UCG_014; f__uncultured_Firmicutes_bacterium; g__uncultured_Firmicutes_bacterium; s__uncultured_Firmicutes_bacterium
ASV2185	15	0	0	0	k__Bacteria; p__Firmicutes; c__Clostridia; o__Clostridia_vadinBB60_group; f__uncultured_Clostridiales_bacterium; g__uncultured_Clostridiales_bacterium; s__uncultured_Clostridiales_bacterium
ASV2187	0	0	0	11	k__Bacteria; p__Firmicutes; c__Clostridia; o__Oscillospirales; f__Ruminococcaceae; g__Negativibacillus; s__unclassified_Negativibacillus
ASV2188	0	0	0	13	k__Bacteria; p__Firmicutes; c__Clostridia; o__Oscillospirales; f__Ruminococcaceae; g__unclassified_Ruminococcaceae; s__unclassified_Ruminococcaceae
ASV2190	26	0	0	0	k__Bacteria; p__Firmicutes; c__Clostridia; o__Oscillospirales; f__Oscillospiraceae; g__unclassified_Oscillospiraceae; s__unclassified_Oscillospiraceae
ASV2191	0	25	0	0	k__Bacteria; p__Firmicutes; c__Clostridia; o__Oscillospirales; f__Oscillospiraceae; g__Intestinimonas; s__unclassified_Intestinimonas
ASV2193	0	0	16	0	k__Bacteria; p__Firmicutes; c__Clostridia; o__Lachnospirales; f__Lachnospiraceae; g__unclassified_Lachnospiraceae; s__unclassified_Lachnospiraceae
ASV2194	0	0	5	0	k__Bacteria; p__Firmicutes; c__Clostridia; o__Oscillospirales; f__[Eubacterium]_coprostanoligenes_group; g__unclassified_[Eubacterium]_coprostanoligenes_group; s__unclassified_[Eubacterium]_coprostanoligenes_group
ASV2196	21	41	1	0	k__Bacteria; p__Firmicutes; c__Clostridia; o__Clostridia_UCG_014; f__uncultured_Clostridiales_bacterium; g__uncultured_Clostridiales_bacterium; s__uncultured_Clostridiales_bacterium
ASV2200	0	1	33	6	k__Bacteria; p__Firmicutes; c__Bacilli; o__Erysipelotrichales; f__Erysipelatoclostridiaceae; g__UCG_004; s__unclassified_UCG_004
ASV2201	0	2	3	0	k__Bacteria; p__Bacteroidota; c__Bacteroidia; o__Bacteroidales; f__Muribaculaceae; g__unclassified_Muribaculaceae; s__unclassified_Muribaculaceae
ASV2202	0	34	1	0	k__Bacteria; p__Bacteroidota; c__Bacteroidia; o__Bacteroidales; f__Muribaculaceae; g__unclassified_Muribaculaceae; s__unclassified_Muribaculaceae
ASV2205	15	10	0	0	k__Bacteria; p__Firmicutes; c__Clostridia; o__Oscillospirales; f__Oscillospiraceae; g__Intestinimonas; s__Intestinimonas_butyriciproducens
ASV2206	0	0	0	12	k__Bacteria; p__Firmicutes; c__Clostridia; o__Lachnospirales; f__Lachnospiraceae; g__Lachnospiraceae_NK4A136_group; s__unclassified_Lachnospiraceae_NK4A136_group
ASV2207	0	1	0	31	k__Bacteria; p__Firmicutes; c__Bacilli; o__RF39; f__uncultured_Lachnospiraceae_bacterium; g__uncultured_Lachnospiraceae_bacterium; s__uncultured_Lachnospiraceae_bacterium
ASV2211	0	0	47	0	k__Bacteria; p__Firmicutes; c__Clostridia; o__Lachnospirales; f__Lachnospiraceae; g__unclassified_Lachnospiraceae; s__unclassified_Lachnospiraceae
ASV2212	17	45	0	0	k__Bacteria; p__Firmicutes; c__Clostridia; o__Oscillospirales; f__Ruminococcaceae; g__Incertae_Sedis; s__unclassified_Incertae_Sedis
ASV2215	0	2	0	0	k__Bacteria; p__Bacteroidota; c__Bacteroidia; o__Bacteroidales; f__Bacteroidaceae; g__Bacteroides; s__unclassified_Bacteroides
ASV2216	0	2	3	8	k__Bacteria; p__Bacteroidota; c__Bacteroidia; o__Bacteroidales; f__Tannerellaceae; g__Parabacteroides; s__unclassified_Parabacteroides
ASV2218	0	6	3	0	k__Bacteria; p__Firmicutes; c__Clostridia; o__Lachnospirales; f__Lachnospiraceae; g__unclassified_Lachnospiraceae; s__unclassified_Lachnospiraceae
ASV2219	0	29	12	0	k__Bacteria; p__Firmicutes; c__Clostridia; o__Lachnospirales; f__Lachnospiraceae; g__unclassified_Lachnospiraceae; s__unclassified_Lachnospiraceae
ASV2220	2	0	6	0	k__Bacteria; p__Firmicutes; c__Clostridia; o__Oscillospirales; f__unclassified_Oscillospirales; g__unclassified_Oscillospirales; s__unclassified_Oscillospirales
ASV2222	0	0	3	0	k__Bacteria; p__Firmicutes; c__Clostridia; o__Oscillospirales; f__Ruminococcaceae; g__Harryflintia; s__unclassified_Harryflintia
ASV2223	0	0	0	14	k__Bacteria; p__Firmicutes; c__Bacilli; o__Lactobacillales; f__Aerococcaceae; g__Facklamia; s__unclassified_Facklamia
ASV2224	0	20	0	18	k__Bacteria; p__Firmicutes; c__Clostridia; o__Lachnospirales; f__Lachnospiraceae; g__Marvinbryantia; s__unclassified_Marvinbryantia
ASV2225	0	0	0	16	k__Bacteria; p__Firmicutes; c__Clostridia; o__Clostridia_vadinBB60_group; f__unclassified_Clostridia_vadinBB60_group; g__unclassified_Clostridia_vadinBB60_group; s__unclassified_Clostridia_vadinBB60_group
ASV2226	0	27	0	0	k__Bacteria; p__Firmicutes; c__Clostridia; o__Lachnospirales; f__Lachnospiraceae; g__[Eubacterium]_fissicatena_group; s__unclassified_[Eubacterium]_fissicatena_group
ASV2230	1	3	10	0	k__Bacteria; p__Firmicutes; c__Clostridia; o__Clostridia_vadinBB60_group; f__unclassified_Clostridia_vadinBB60_group; g__unclassified_Clostridia_vadinBB60_group; s__unclassified_Clostridia_vadinBB60_group
ASV2232	0	0	8	0	k__Bacteria; p__Firmicutes; c__Clostridia; o__Oscillospirales; f__Oscillospiraceae; g__UCG_005; s__unclassified_UCG_005
ASV2233	0	3	1	4	k__Bacteria; p__Bacteroidota; c__Bacteroidia; o__Bacteroidales; f__Bacteroidaceae; g__Bacteroides; s__unclassified_Bacteroides
ASV2234	0	13	0	0	k__Bacteria; p__Firmicutes; c__Clostridia; o__Lachnospirales; f__Lachnospiraceae; g__unclassified_Lachnospiraceae; s__unclassified_Lachnospiraceae
ASV2235	0	0	0	1	k__Bacteria; p__Actinobacteriota; c__Coriobacteriia; o__Coriobacteriales; f__Eggerthellaceae; g__Gordonibacter; s__unclassified_Gordonibacter
ASV2236	0	0	0	60	k__Bacteria; p__Firmicutes; c__Clostridia; o__Clostridia_UCG_014; f__unclassified_Clostridia_UCG_014; g__unclassified_Clostridia_UCG_014; s__unclassified_Clostridia_UCG_014
ASV2240	17	0	0	0	k__Bacteria; p__Firmicutes; c__Clostridia; o__Oscillospirales; f__Oscillospiraceae; g__unclassified_Oscillospiraceae; s__unclassified_Oscillospiraceae
ASV2243	0	0	2	0	k__Bacteria; p__Firmicutes; c__Bacilli; o__Staphylococcales; f__Staphylococcaceae; g__Jeotgalicoccus; s__unclassified_Jeotgalicoccus
ASV2244	0	0	20	0	k__Bacteria; p__Firmicutes; c__Clostridia; o__Oscillospirales; f__Hungateiclostridiaceae; g__unclassified_Hungateiclostridiaceae; s__unclassified_Hungateiclostridiaceae
ASV2245	5	8	0	4	k__Bacteria; p__Firmicutes; c__Clostridia; o__Oscillospirales; f__Ruminococcaceae; g__Candidatus_Soleaferrea; s__unclassified_Candidatus_Soleaferrea
ASV2246	0	0	0	32	k__Bacteria; p__Firmicutes; c__Clostridia; o__Clostridia_UCG_014; f__unclassified_Clostridia_UCG_014; g__unclassified_Clostridia_UCG_014; s__unclassified_Clostridia_UCG_014
ASV2248	0	8	0	0	k__Bacteria; p__Firmicutes; c__Clostridia; o__Oscillospirales; f__Oscillospiraceae; g__unclassified_Oscillospiraceae; s__unclassified_Oscillospiraceae
ASV2250	0	18	0	0	k__Bacteria; p__Firmicutes; c__Clostridia; o__Lachnospirales; f__Lachnospiraceae; g__unclassified_Lachnospiraceae; s__unclassified_Lachnospiraceae
ASV2251	0	0	0	21	k__Bacteria; p__Firmicutes; c__Clostridia; o__Lachnospirales; f__Lachnospiraceae; g__unclassified_Lachnospiraceae; s__unclassified_Lachnospiraceae
ASV2252	0	0	17	0	k__Bacteria; p__Firmicutes; c__Clostridia; o__Clostridia_vadinBB60_group; f__unclassified_Clostridia_vadinBB60_group; g__unclassified_Clostridia_vadinBB60_group; s__unclassified_Clostridia_vadinBB60_group
ASV2255	0	0	0	58	k__Bacteria; p__Firmicutes; c__Clostridia; o__Clostridia_UCG_014; f__unclassified_Clostridia_UCG_014; g__unclassified_Clostridia_UCG_014; s__unclassified_Clostridia_UCG_014
ASV2256	0	0	0	58	k__Bacteria; p__Firmicutes; c__Clostridia; o__Clostridia_vadinBB60_group; f__unclassified_Clostridia_vadinBB60_group; g__unclassified_Clostridia_vadinBB60_group; s__unclassified_Clostridia_vadinBB60_group
ASV2257	0	29	0	0	k__Bacteria; p__Firmicutes; c__Clostridia; o__Peptococcales; f__Peptococcaceae; g__unclassified_Peptococcaceae; s__unclassified_Peptococcaceae
ASV2259	0	24	0	0	k__Bacteria; p__Firmicutes; c__Clostridia; o__Clostridia_UCG_014; f__unclassified_Clostridia_UCG_014; g__unclassified_Clostridia_UCG_014; s__unclassified_Clostridia_UCG_014
ASV2262	0	0	32	0	k__Bacteria; p__Bacteroidota; c__Bacteroidia; o__Bacteroidales; f__Muribaculaceae; g__unclassified_Muribaculaceae; s__unclassified_Muribaculaceae
ASV2265	0	4	10	0	k__Bacteria; p__Firmicutes; c__Clostridia; o__Lachnospirales; f__Lachnospiraceae; g__unclassified_Lachnospiraceae; s__unclassified_Lachnospiraceae
ASV2266	0	0	0	13	k__Bacteria; p__Firmicutes; c__Clostridia; o__Oscillospirales; f__Oscillospiraceae; g__Intestinimonas; s__unclassified_Intestinimonas
ASV2268	0	1	1	0	Unassigned; Unassigned; Unassigned; Unassigned; Unassigned; Unassigned; Unassigned
ASV2270	0	39	0	0	k__Bacteria; p__Firmicutes; c__Clostridia; o__Clostridia_UCG_014; f__uncultured_Firmicutes_bacterium; g__uncultured_Firmicutes_bacterium; s__uncultured_Firmicutes_bacterium
ASV2271	0	4	0	0	k__Bacteria; p__Patescibacteria; c__Saccharimonadia; o__Saccharimonadales; f__Saccharimonadaceae; g__Candidatus_Saccharimonas; s__unclassified_Candidatus_Saccharimonas
ASV2272	0	0	0	57	k__Bacteria; p__Firmicutes; c__Clostridia; o__Clostridia_UCG_014; f__unclassified_Clostridia_UCG_014; g__unclassified_Clostridia_UCG_014; s__unclassified_Clostridia_UCG_014
ASV2273	0	0	0	6	k__Bacteria; p__Firmicutes; c__Clostridia; o__Lachnospirales; f__Lachnospiraceae; g__unclassified_Lachnospiraceae; s__unclassified_Lachnospiraceae
ASV2274	0	14	3	0	k__Bacteria; p__Firmicutes; c__Clostridia; o__Christensenellales; f__Christensenellaceae; g__unclassified_Christensenellaceae; s__unclassified_Christensenellaceae
ASV2275	13	0	0	0	k__Bacteria; p__Firmicutes; c__Clostridia; o__unclassified_Clostridia; f__unclassified_Clostridia; g__unclassified_Clostridia; s__unclassified_Clostridia
ASV2276	0	1	20	0	k__Bacteria; p__Firmicutes; c__Clostridia; o__Lachnospirales; f__Lachnospiraceae; g__unclassified_Lachnospiraceae; s__unclassified_Lachnospiraceae
ASV2283	44	0	0	0	k__Bacteria; p__Firmicutes; c__Clostridia; o__Clostridia_vadinBB60_group; f__unclassified_Clostridia_vadinBB60_group; g__unclassified_Clostridia_vadinBB60_group; s__unclassified_Clostridia_vadinBB60_group
ASV2285	0	0	0	5	k__Bacteria; p__Firmicutes; c__Clostridia; o__Lachnospirales; f__Lachnospiraceae; g__unclassified_Lachnospiraceae; s__unclassified_Lachnospiraceae
ASV2286	0	4	0	0	k__Bacteria; p__Firmicutes; c__Clostridia; o__Lachnospirales; f__Lachnospiraceae; g__Lachnospiraceae_UCG_006; s__unclassified_Lachnospiraceae_UCG_006
ASV2287	0	0	3	7	k__Bacteria; p__Bacteroidota; c__Bacteroidia; o__Bacteroidales; f__Tannerellaceae; g__Parabacteroides; s__uncultured_Bacteroidales_bacterium
ASV2288	0	18	0	0	k__Bacteria; p__Firmicutes; c__Clostridia; o__Clostridia_UCG_014; f__unclassified_Clostridia_UCG_014; g__unclassified_Clostridia_UCG_014; s__unclassified_Clostridia_UCG_014
ASV2293	0	0	0	6	k__Bacteria; p__Firmicutes; c__Clostridia; o__Lachnospirales; f__Lachnospiraceae; g__unclassified_Lachnospiraceae; s__unclassified_Lachnospiraceae
ASV2294	0	10	13	13	k__Bacteria; p__Firmicutes; c__Clostridia; o__Oscillospirales; f__Ruminococcaceae; g__UBA1819; s__unclassified_UBA1819
ASV2296	0	28	0	0	k__Bacteria; p__Firmicutes; c__Clostridia; o__Clostridia_UCG_014; f__unclassified_Clostridia_UCG_014; g__unclassified_Clostridia_UCG_014; s__unclassified_Clostridia_UCG_014
ASV2299	0	1	0	0	k__Bacteria; p__Firmicutes; c__Clostridia; o__Lachnospirales; f__Lachnospiraceae; g__unclassified_Lachnospiraceae; s__unclassified_Lachnospiraceae
ASV2302	0	0	56	0	k__Bacteria; p__Bacteroidota; c__Bacteroidia; o__Bacteroidales; f__Muribaculaceae; g__unclassified_Muribaculaceae; s__unclassified_Muribaculaceae
ASV2303	0	1	1	0	k__Bacteria; p__Firmicutes; c__Clostridia; o__Peptostreptococcales_Tissierellales; f__Family_XI; g__Finegoldia; s__unclassified_Finegoldia
ASV2305	0	0	29	0	k__Bacteria; p__Firmicutes; c__Clostridia; o__Lachnospirales; f__Lachnospiraceae; g__unclassified_Lachnospiraceae; s__unclassified_Lachnospiraceae
ASV2306	0	0	20	0	k__Bacteria; p__Firmicutes; c__Clostridia; o__Lachnospirales; f__Lachnospiraceae; g__Blautia; s__unclassified_Blautia
ASV2307	0	14	0	0	k__Bacteria; p__Firmicutes; c__Clostridia; o__Oscillospirales; f__Ruminococcaceae; g__Harryflintia; s__unclassified_Harryflintia
ASV2310	0	4	4	5	k__Bacteria; p__Firmicutes; c__Clostridia; o__Oscillospirales; f__Ruminococcaceae; g__unclassified_Ruminococcaceae; s__unclassified_Ruminococcaceae
ASV2311	0	40	0	15	k__Bacteria; p__Firmicutes; c__Clostridia; o__Oscillospirales; f__Butyricicoccaceae; g__Butyricicoccus; s__unclassified_Butyricicoccus
ASV2312	0	0	0	27	k__Bacteria; p__Bacteroidota; c__Bacteroidia; o__Bacteroidales; f__Bacteroidaceae; g__Bacteroides; s__unclassified_Bacteroides
ASV2313	0	0	0	55	k__Bacteria; p__Bacteroidota; c__Bacteroidia; o__Bacteroidales; f__Muribaculaceae; g__uncultured_Bacteroidales_bacterium; s__uncultured_Bacteroidales_bacterium
ASV2316	0	0	26	0	k__Bacteria; p__Firmicutes; c__Bacilli; o__Erysipelotrichales; f__Erysipelotrichaceae; g__Dubosiella; s__unclassified_Dubosiella
ASV2317	55	0	0	0	k__Bacteria; p__Firmicutes; c__Clostridia; o__Clostridia_UCG_014; f__unclassified_Clostridia_UCG_014; g__unclassified_Clostridia_UCG_014; s__unclassified_Clostridia_UCG_014
ASV2318	0	28	14	0	k__Bacteria; p__Firmicutes; c__Clostridia; o__Oscillospirales; f__Oscillospiraceae; g__NK4A214_group; s__unclassified_NK4A214_group
ASV2320	0	2	6	0	k__Bacteria; p__Firmicutes; c__Bacilli; o__Lactobacillales; f__Streptococcaceae; g__Streptococcus; s__unclassified_Streptococcus
ASV2321	0	0	0	8	k__Bacteria; p__Firmicutes; c__Clostridia; o__Lachnospirales; f__Lachnospiraceae; g__unclassified_Lachnospiraceae; s__unclassified_Lachnospiraceae
ASV2324	0	0	0	10	k__Bacteria; p__Firmicutes; c__Clostridia; o__Oscillospirales; f__Oscillospiraceae; g__Intestinimonas; s__unclassified_Intestinimonas
ASV2326	0	0	0	7	k__Bacteria; p__Firmicutes; c__Clostridia; o__Lachnospirales; f__Lachnospiraceae; g__unclassified_Lachnospiraceae; s__unclassified_Lachnospiraceae
ASV2329	0	0	0	13	k__Bacteria; p__Firmicutes; c__Clostridia; o__Peptococcales; f__Peptococcaceae; g__unclassified_Peptococcaceae; s__unclassified_Peptococcaceae
ASV2330	0	0	0	3	k__Bacteria; p__Firmicutes; c__Clostridia; o__Lachnospirales; f__Lachnospiraceae; g__unclassified_Lachnospiraceae; s__unclassified_Lachnospiraceae
ASV2331	36	0	0	0	k__Bacteria; p__Firmicutes; c__Clostridia; o__Clostridia_UCG_014; f__unclassified_Clostridia_UCG_014; g__unclassified_Clostridia_UCG_014; s__unclassified_Clostridia_UCG_014
ASV2336	0	0	2	0	k__Bacteria; p__Firmicutes; c__Clostridia; o__Oscillospirales; f__Oscillospiraceae; g__unclassified_Oscillospiraceae; s__unclassified_Oscillospiraceae
ASV2337	0	0	2	0	k__Bacteria; p__Firmicutes; c__Negativicutes; o__Veillonellales_Selenomonadales; f__Selenomonadaceae; g__Megamonas; s__unclassified_Megamonas
ASV2338	1	3	5	7	k__Bacteria; p__Desulfobacterota; c__Desulfovibrionia; o__Desulfovibrionales; f__Desulfovibrionaceae; g__unclassified_Desulfovibrionaceae; s__unclassified_Desulfovibrionaceae
ASV2340	0	0	6	17	k__Bacteria; p__Firmicutes; c__Bacilli; o__RF39; f__uncultured_rumen_bacterium; g__uncultured_rumen_bacterium; s__uncultured_rumen_bacterium
ASV2341	6	0	0	0	k__Bacteria; p__Firmicutes; c__Clostridia; o__Clostridia_vadinBB60_group; f__unclassified_Clostridia_vadinBB60_group; g__unclassified_Clostridia_vadinBB60_group; s__unclassified_Clostridia_vadinBB60_group
ASV2343	16	0	1	0	k__Bacteria; p__Firmicutes; c__Bacilli; o__Lactobacillales; f__Carnobacteriaceae; g__Atopostipes; s__unclassified_Atopostipes
ASV2345	0	0	0	21	k__Bacteria; p__Firmicutes; c__Clostridia; o__Clostridia_UCG_014; f__unclassified_Clostridia_UCG_014; g__unclassified_Clostridia_UCG_014; s__unclassified_Clostridia_UCG_014
ASV2346	0	0	0	41	k__Bacteria; p__Bacteroidota; c__Bacteroidia; o__Bacteroidales; f__Rikenellaceae; g__Alistipes; s__unclassified_Alistipes
ASV2354	0	36	0	0	k__Bacteria; p__Firmicutes; c__Clostridia; o__Lachnospirales; f__Lachnospiraceae; g__Lachnospiraceae_NK4A136_group; s__unclassified_Lachnospiraceae_NK4A136_group
ASV2356	9	2	1	8	k__Bacteria; p__Bacteroidota; c__Bacteroidia; o__Bacteroidales; f__Muribaculaceae; g__unclassified_Muribaculaceae; s__unclassified_Muribaculaceae
ASV2358	0	5	0	0	k__Bacteria; p__Firmicutes; c__Bacilli; o__Erysipelotrichales; f__Erysipelotrichaceae; g__unclassified_Erysipelotrichaceae; s__unclassified_Erysipelotrichaceae
ASV2359	0	0	0	34	k__Bacteria; p__Bacteroidota; c__Bacteroidia; o__Bacteroidales; f__Marinifilaceae; g__Odoribacter; s__unclassified_Odoribacter
ASV2360	0	19	3	1	k__Bacteria; p__Firmicutes; c__Clostridia; o__Lachnospirales; f__Lachnospiraceae; g__unclassified_Lachnospiraceae; s__unclassified_Lachnospiraceae
ASV2361	0	18	0	0	k__Bacteria; p__Bacteroidota; c__Bacteroidia; o__Bacteroidales; f__Rikenellaceae; g__Alistipes; s__Alistipes_sp._N15.MGS_157
ASV2363	16	0	0	23	k__Bacteria; p__Firmicutes; c__Clostridia; o__Oscillospirales; f__UCG_010; g__unclassified_UCG_010; s__unclassified_UCG_010
ASV2364	0	0	0	2	k__Bacteria; p__Bacteroidota; c__Bacteroidia; o__Bacteroidales; f__Muribaculaceae; g__unclassified_Muribaculaceae; s__unclassified_Muribaculaceae
ASV2375	16	0	0	0	k__Bacteria; p__Firmicutes; c__Clostridia; o__Clostridia_vadinBB60_group; f__unclassified_Clostridia_vadinBB60_group; g__unclassified_Clostridia_vadinBB60_group; s__unclassified_Clostridia_vadinBB60_group
ASV2379	18	5	0	6	k__Bacteria; p__Firmicutes; c__Clostridia; o__Clostridia_vadinBB60_group; f__uncultured_Clostridiales_bacterium; g__uncultured_Clostridiales_bacterium; s__uncultured_Clostridiales_bacterium
ASV2381	1	0	0	0	k__Bacteria; p__Firmicutes; c__Clostridia; o__Oscillospirales; f__Ruminococcaceae; g__unclassified_Ruminococcaceae; s__unclassified_Ruminococcaceae
ASV2383	0	1	2	0	k__Bacteria; p__Firmicutes; c__Clostridia; o__Oscillospirales; f__Oscillospiraceae; g__unclassified_Oscillospiraceae; s__unclassified_Oscillospiraceae
ASV2387	0	9	4	0	k__Bacteria; p__Firmicutes; c__Clostridia; o__Lachnospirales; f__Lachnospiraceae; g__unclassified_Lachnospiraceae; s__unclassified_Lachnospiraceae
ASV2388	0	7	0	0	k__Bacteria; p__Firmicutes; c__Clostridia; o__Lachnospirales; f__Lachnospiraceae; g__unclassified_Lachnospiraceae; s__unclassified_Lachnospiraceae
ASV2391	0	8	0	0	k__Bacteria; p__Firmicutes; c__Clostridia; o__Oscillospirales; f__Ruminococcaceae; g__unclassified_Ruminococcaceae; s__unclassified_Ruminococcaceae
ASV2394	0	1	13	0	k__Bacteria; p__Firmicutes; c__Clostridia; o__Peptostreptococcales_Tissierellales; f__Anaerovoracaceae; g__Family_XIII_AD3011_group; s__unclassified_Family_XIII_AD3011_group
ASV2396	0	1	25	16	k__Bacteria; p__Firmicutes; c__Clostridia; o__Oscillospirales; f__[Eubacterium]_coprostanoligenes_group; g__unclassified_[Eubacterium]_coprostanoligenes_group; s__unclassified_[Eubacterium]_coprostanoligenes_group
ASV2402	0	2	2	0	k__Bacteria; p__Firmicutes; c__Clostridia; o__Lachnospirales; f__Lachnospiraceae; g__unclassified_Lachnospiraceae; s__unclassified_Lachnospiraceae
ASV2403	0	0	1	0	k__Bacteria; p__Firmicutes; c__Bacilli; o__Erysipelotrichales; f__Erysipelotrichaceae; g__unclassified_Erysipelotrichaceae; s__unclassified_Erysipelotrichaceae
ASV2409	0	1	4	1	k__Bacteria; p__Bacteroidota; c__Bacteroidia; o__Bacteroidales; f__Tannerellaceae; g__Parabacteroides; s__unclassified_Parabacteroides
ASV2412	21	4	2	0	k__Bacteria; p__Bacteroidota; c__Bacteroidia; o__Bacteroidales; f__Muribaculaceae; g__unclassified_Muribaculaceae; s__unclassified_Muribaculaceae
ASV2413	5	0	0	0	k__Bacteria; p__Firmicutes; c__Bacilli; o__Lactobacillales; f__Streptococcaceae; g__Streptococcus; s__Streptococcus_danieliae
ASV2415	0	0	1	18	k__Bacteria; p__Firmicutes; c__Bacilli; o__Erysipelotrichales; f__Erysipelotrichaceae; g__unclassified_Erysipelotrichaceae; s__unclassified_Erysipelotrichaceae
ASV2416	0	12	0	0	k__Bacteria; p__Firmicutes; c__Clostridia; o__Oscillospirales; f__Oscillospiraceae; g__unclassified_Oscillospiraceae; s__unclassified_Oscillospiraceae
ASV2423	0	49	0	0	k__Bacteria; p__Firmicutes; c__Clostridia; o__Clostridia_UCG_014; f__unclassified_Clostridia_UCG_014; g__unclassified_Clostridia_UCG_014; s__unclassified_Clostridia_UCG_014
ASV2424	0	49	0	0	k__Bacteria; p__Firmicutes; c__Bacilli; o__Staphylococcales; f__Staphylococcaceae; g__Staphylococcus; s__unclassified_Staphylococcus
ASV2425	0	1	0	0	k__Bacteria; p__Firmicutes; c__Clostridia; o__Lachnospirales; f__Lachnospiraceae; g__unclassified_Lachnospiraceae; s__unclassified_Lachnospiraceae
ASV2430	2	0	4	0	k__Bacteria; p__Firmicutes; c__Bacilli; o__Erysipelotrichales; f__Erysipelotrichaceae; g__Dubosiella; s__unclassified_Dubosiella
ASV2431	0	4	4	1	k__Bacteria; p__Firmicutes; c__Clostridia; o__Lachnospirales; f__Lachnospiraceae; g__unclassified_Lachnospiraceae; s__unclassified_Lachnospiraceae
ASV2432	4	1	2	10	k__Bacteria; p__Bacteroidota; c__Bacteroidia; o__Bacteroidales; f__Muribaculaceae; g__unclassified_Muribaculaceae; s__unclassified_Muribaculaceae
ASV2434	0	0	13	0	k__Bacteria; p__Firmicutes; c__Clostridia; o__Oscillospirales; f__Oscillospiraceae; g__Oscillibacter; s__unclassified_Oscillibacter
ASV2435	0	0	0	4	k__Bacteria; p__Bacteroidota; c__Bacteroidia; o__Bacteroidales; f__Rikenellaceae; g__Alistipes; s__unclassified_Alistipes
ASV2436	11	2	0	1	k__Bacteria; p__Firmicutes; c__Clostridia; o__Lachnospirales; f__Lachnospiraceae; g__unclassified_Lachnospiraceae; s__unclassified_Lachnospiraceae
ASV2437	6	0	0	23	k__Bacteria; p__Firmicutes; c__Bacilli; o__Lactobacillales; f__Lactobacillaceae; g__Ligilactobacillus; s__unclassified_Ligilactobacillus
ASV2438	12	0	0	0	k__Bacteria; p__Firmicutes; c__Clostridia; o__Lachnospirales; f__Lachnospiraceae; g__Lachnospiraceae_UCG_006; s__unclassified_Lachnospiraceae_UCG_006
ASV2442	0	0	48	0	k__Bacteria; p__Bacteroidota; c__Bacteroidia; o__Bacteroidales; f__Muribaculaceae; g__unclassified_Muribaculaceae; s__unclassified_Muribaculaceae
ASV2443	17	1	4	0	k__Bacteria; p__Bacteroidota; c__Bacteroidia; o__Bacteroidales; f__Muribaculaceae; g__unclassified_Muribaculaceae; s__unclassified_Muribaculaceae
ASV2446	0	6	0	0	k__Bacteria; p__Bacteroidota; c__Bacteroidia; o__Bacteroidales; f__Marinifilaceae; g__Butyricimonas; s__unclassified_Butyricimonas
ASV2447	12	1	3	0	k__Bacteria; p__Firmicutes; c__Clostridia; o__Lachnospirales; f__Lachnospiraceae; g__unclassified_Lachnospiraceae; s__unclassified_Lachnospiraceae
ASV2450	0	10	0	0	k__Bacteria; p__Firmicutes; c__Clostridia; o__Oscillospirales; f__Oscillospiraceae; g__Oscillibacter; s__unclassified_Oscillibacter
ASV2452	0	0	0	13	k__Bacteria; p__Firmicutes; c__Clostridia; o__Lachnospirales; f__Lachnospiraceae; g__unclassified_Lachnospiraceae; s__unclassified_Lachnospiraceae
ASV2453	0	0	0	11	k__Bacteria; p__Firmicutes; c__Clostridia; o__Oscillospirales; f__Ruminococcaceae; g__Incertae_Sedis; s__unclassified_Incertae_Sedis
ASV2456	0	0	1	0	k__Bacteria; p__Proteobacteria; c__Alphaproteobacteria; o__Sphingomonadales; f__Sphingomonadaceae; g__Sphingopyxis; s__unclassified_Sphingopyxis
ASV2462	24	0	0	0	k__Bacteria; p__Firmicutes; c__Bacilli; o__RF39; f__unclassified_RF39; g__unclassified_RF39; s__unclassified_RF39
ASV2463	47	0	0	0	k__Bacteria; p__Firmicutes; c__Clostridia; o__Clostridia_UCG_014; f__unclassified_Clostridia_UCG_014; g__unclassified_Clostridia_UCG_014; s__unclassified_Clostridia_UCG_014
ASV2465	0	0	17	0	k__Bacteria; p__Firmicutes; c__Clostridia; o__Lachnospirales; f__Lachnospiraceae; g__unclassified_Lachnospiraceae; s__unclassified_Lachnospiraceae
ASV2470	0	3	0	0	k__Bacteria; p__Bacteroidota; c__Bacteroidia; o__Bacteroidales; f__Muribaculaceae; g__unclassified_Muribaculaceae; s__unclassified_Muribaculaceae
ASV2471	0	0	0	46	k__Bacteria; p__Firmicutes; c__Clostridia; o__Clostridia_UCG_014; f__unclassified_Clostridia_UCG_014; g__unclassified_Clostridia_UCG_014; s__unclassified_Clostridia_UCG_014
ASV2472	0	0	0	46	k__Bacteria; p__Bacteroidota; c__Bacteroidia; o__Bacteroidales; f__Muribaculaceae; g__unclassified_Muribaculaceae; s__unclassified_Muribaculaceae
ASV2477	14	0	0	0	k__Bacteria; p__Firmicutes; c__Clostridia; o__Clostridia_UCG_014; f__unclassified_Clostridia_UCG_014; g__unclassified_Clostridia_UCG_014; s__unclassified_Clostridia_UCG_014
ASV2478	46	0	0	0	k__Bacteria; p__Firmicutes; c__Clostridia; o__Oscillospirales; f__Butyricicoccaceae; g__Butyricicoccus; s__unclassified_Butyricicoccus
ASV2482	11	0	0	0	k__Bacteria; p__Bacteroidota; c__Bacteroidia; o__Bacteroidales; f__Bacteroidaceae; g__Bacteroides; s__unclassified_Bacteroides
ASV2484	0	1	0	4	k__Bacteria; p__Bacteroidota; c__Bacteroidia; o__Bacteroidales; f__Muribaculaceae; g__unclassified_Muribaculaceae; s__unclassified_Muribaculaceae
ASV2486	0	25	0	0	k__Bacteria; p__Proteobacteria; c__Gammaproteobacteria; o__Pseudomonadales; f__Moraxellaceae; g__Acinetobacter; s__unclassified_Acinetobacter
ASV2489	0	11	0	0	k__Bacteria; p__Firmicutes; c__Clostridia; o__Oscillospirales; f__Oscillospiraceae; g__unclassified_Oscillospiraceae; s__unclassified_Oscillospiraceae
ASV2498	22	0	0	0	k__Bacteria; p__Actinobacteriota; c__Actinobacteria; o__Bifidobacteriales; f__Bifidobacteriaceae; g__Bifidobacterium; s__unclassified_Bifidobacterium
ASV2500	18	0	0	8	k__Bacteria; p__Firmicutes; c__Clostridia; o__Oscillospirales; f__Oscillospiraceae; g__unclassified_Oscillospiraceae; s__unclassified_Oscillospiraceae
ASV2503	27	16	0	0	k__Bacteria; p__Firmicutes; c__Clostridia; o__Lachnospirales; f__Lachnospiraceae; g__unclassified_Lachnospiraceae; s__unclassified_Lachnospiraceae
ASV2504	0	6	0	0	k__Bacteria; p__Bacteroidota; c__Bacteroidia; o__Bacteroidales; f__Muribaculaceae; g__unclassified_Muribaculaceae; s__unclassified_Muribaculaceae
ASV2507	0	1	0	0	k__Bacteria; p__Firmicutes; c__Negativicutes; o__Acidaminococcales; f__Acidaminococcaceae; g__Phascolarctobacterium; s__uncultured_Veillonellaceae_bacterium
ASV2508	0	0	19	0	k__Bacteria; p__Firmicutes; c__Clostridia; o__Lachnospirales; f__Lachnospiraceae; g__unclassified_Lachnospiraceae; s__unclassified_Lachnospiraceae
ASV2513	8	0	0	0	k__Bacteria; p__Firmicutes; c__Clostridia; o__Lachnospirales; f__Lachnospiraceae; g__unclassified_Lachnospiraceae; s__unclassified_Lachnospiraceae
ASV2515	17	4	3	1	k__Bacteria; p__Bacteroidota; c__Bacteroidia; o__Bacteroidales; f__Muribaculaceae; g__unclassified_Muribaculaceae; s__unclassified_Muribaculaceae
ASV2517	0	0	3	12	k__Bacteria; p__Bacteroidota; c__Bacteroidia; o__Bacteroidales; f__Rikenellaceae; g__Alistipes; s__unclassified_Alistipes
ASV2518	0	0	0	34	k__Bacteria; p__Bacteroidota; c__Bacteroidia; o__Bacteroidales; f__Bacteroidaceae; g__Bacteroides; s__Bacteroides_acidifaciens
ASV2521	0	9	0	0	k__Bacteria; p__Firmicutes; c__Clostridia; o__Lachnospirales; f__Lachnospiraceae; g__unclassified_Lachnospiraceae; s__unclassified_Lachnospiraceae
ASV2522	0	0	0	2	k__Bacteria; p__Firmicutes; c__Clostridia; o__Lachnospirales; f__Lachnospiraceae; g__unclassified_Lachnospiraceae; s__unclassified_Lachnospiraceae
ASV2523	0	0	0	21	k__Bacteria; p__Firmicutes; c__Clostridia; o__Clostridia_UCG_014; f__uncultured_Clostridiales_bacterium; g__uncultured_Clostridiales_bacterium; s__uncultured_Clostridiales_bacterium
ASV2526	0	26	0	0	k__Bacteria; p__Firmicutes; c__Bacilli; o__RF39; f__uncultured_Paenibacillaceae_bacterium; g__uncultured_Paenibacillaceae_bacterium; s__uncultured_Paenibacillaceae_bacterium
ASV2531	0	0	6	0	k__Bacteria; p__Proteobacteria; c__Alphaproteobacteria; o__Rhodospirillales; f__unclassified_Rhodospirillales; g__unclassified_Rhodospirillales; s__unclassified_Rhodospirillales
ASV2532	0	0	6	1	k__Bacteria; p__Bacteroidota; c__Bacteroidia; o__Bacteroidales; f__Tannerellaceae; g__Parabacteroides; s__unclassified_Parabacteroides
ASV2533	0	11	0	0	k__Bacteria; p__Firmicutes; c__Bacilli; o__Erysipelotrichales; f__Erysipelatoclostridiaceae; g__Erysipelatoclostridium; s__[Clostridium]_saccharogumia
ASV2534	0	9	0	2	k__Bacteria; p__Firmicutes; c__Clostridia; o__Lachnospirales; f__Lachnospiraceae; g__unclassified_Lachnospiraceae; s__unclassified_Lachnospiraceae
ASV2536	0	1	8	0	k__Bacteria; p__Firmicutes; c__Clostridia; o__Clostridia_vadinBB60_group; f__uncultured_Clostridiales_bacterium; g__uncultured_Clostridiales_bacterium; s__uncultured_Clostridiales_bacterium
ASV2538	2	0	0	0	k__Bacteria; p__Firmicutes; c__Bacilli; o__Erysipelotrichales; f__Erysipelotrichaceae; g__unclassified_Erysipelotrichaceae; s__unclassified_Erysipelotrichaceae
ASV2541	0	0	21	8	k__Bacteria; p__Firmicutes; c__Clostridia; o__Clostridia_UCG_014; f__unclassified_Clostridia_UCG_014; g__unclassified_Clostridia_UCG_014; s__unclassified_Clostridia_UCG_014
ASV2542	0	0	0	10	k__Bacteria; p__Firmicutes; c__Clostridia; o__Christensenellales; f__Christensenellaceae; g__unclassified_Christensenellaceae; s__unclassified_Christensenellaceae
ASV2543	0	6	12	0	k__Bacteria; p__Firmicutes; c__Clostridia; o__Clostridia_vadinBB60_group; f__uncultured_Clostridiales_bacterium; g__uncultured_Clostridiales_bacterium; s__uncultured_Clostridiales_bacterium
ASV2544	12	16	0	0	k__Bacteria; p__Firmicutes; c__Bacilli; o__RF39; f__unclassified_RF39; g__unclassified_RF39; s__unclassified_RF39
ASV2545	0	0	22	0	k__Bacteria; p__Firmicutes; c__Clostridia; o__Lachnospirales; f__Lachnospiraceae; g__unclassified_Lachnospiraceae; s__unclassified_Lachnospiraceae
ASV2553	0	0	30	0	k__Bacteria; p__Firmicutes; c__Clostridia; o__Oscillospirales; f__Ruminococcaceae; g__Anaerotruncus; s__unclassified_Anaerotruncus
ASV2554	0	8	7	0	k__Bacteria; p__Actinobacteriota; c__Coriobacteriia; o__Coriobacteriales; f__Eggerthellaceae; g__Enterorhabdus; s__unclassified_Enterorhabdus
ASV2555	11	0	0	0	k__Bacteria; p__Firmicutes; c__Clostridia; o__Lachnospirales; f__Lachnospiraceae; g__unclassified_Lachnospiraceae; s__unclassified_Lachnospiraceae
ASV2562	0	0	42	0	k__Bacteria; p__Firmicutes; c__Clostridia; o__Lachnospirales; f__Lachnospiraceae; g__unclassified_Lachnospiraceae; s__unclassified_Lachnospiraceae
ASV2563	0	42	0	0	k__Bacteria; p__Firmicutes; c__Clostridia; o__Clostridia_UCG_014; f__unclassified_Clostridia_UCG_014; g__unclassified_Clostridia_UCG_014; s__unclassified_Clostridia_UCG_014
ASV2566	0	0	0	3	k__Bacteria; p__Firmicutes; c__Clostridia; o__Lachnospirales; f__Lachnospiraceae; g__unclassified_Lachnospiraceae; s__unclassified_Lachnospiraceae
ASV2568	0	0	0	41	k__Bacteria; p__Firmicutes; c__Clostridia; o__Clostridia_UCG_014; f__unclassified_Clostridia_UCG_014; g__unclassified_Clostridia_UCG_014; s__unclassified_Clostridia_UCG_014
ASV2569	0	0	0	20	k__Bacteria; p__Firmicutes; c__Clostridia; o__Clostridia_UCG_014; Unclassified; Unclassified; Unclassified
ASV2570	1	1	0	10	k__Bacteria; p__Firmicutes; c__Clostridia; o__Lachnospirales; f__Lachnospiraceae; g__Lachnospiraceae_NK4A136_group; s__unclassified_Lachnospiraceae_NK4A136_group
ASV2571	0	0	0	27	k__Bacteria; p__Firmicutes; c__Clostridia; o__Oscillospirales; f__Ruminococcaceae; g__Incertae_Sedis; s__unclassified_Incertae_Sedis
ASV2572	0	7	0	3	k__Bacteria; p__Bacteroidota; c__Bacteroidia; o__Bacteroidales; f__Rikenellaceae; g__Alistipes; s__Alistipes_inops
ASV2573	0	0	15	0	k__Bacteria; p__Firmicutes; c__Clostridia; o__Lachnospirales; f__Lachnospiraceae; g__unclassified_Lachnospiraceae; s__unclassified_Lachnospiraceae
ASV2575	2	0	0	0	k__Bacteria; p__Actinobacteriota; c__Coriobacteriia; o__Coriobacteriales; f__Eggerthellaceae; g__Enterorhabdus; s__unclassified_Enterorhabdus
ASV2578	0	0	7	0	k__Bacteria; p__Firmicutes; c__Clostridia; o__Lachnospirales; f__Lachnospiraceae; g__unclassified_Lachnospiraceae; s__unclassified_Lachnospiraceae
ASV2583	33	8	0	0	k__Bacteria; p__Firmicutes; c__Clostridia; o__Oscillospirales; f__Ruminococcaceae; g__Incertae_Sedis; s__unclassified_Incertae_Sedis
ASV2590	0	0	41	0	k__Bacteria; p__Firmicutes; c__Clostridia; o__Clostridia_UCG_014; f__unclassified_Clostridia_UCG_014; g__unclassified_Clostridia_UCG_014; s__unclassified_Clostridia_UCG_014
ASV2591	0	0	41	0	k__Bacteria; p__Patescibacteria; c__Saccharimonadia; o__Saccharimonadales; f__Saccharimonadaceae; g__Candidatus_Saccharimonas; s__unclassified_Candidatus_Saccharimonas
ASV2597	0	1	0	9	k__Bacteria; p__Bacteroidota; c__Bacteroidia; o__Bacteroidales; f__Tannerellaceae; g__Parabacteroides; s__uncultured_Bacteroidales_bacterium
ASV2600	0	0	7	5	k__Bacteria; p__Actinobacteriota; c__Coriobacteriia; o__Coriobacteriales; f__Eggerthellaceae; g__Enterorhabdus; s__unclassified_Enterorhabdus
ASV2613	0	40	0	0	k__Bacteria; p__Firmicutes; c__Clostridia; o__Clostridia_UCG_014; f__unclassified_Clostridia_UCG_014; g__unclassified_Clostridia_UCG_014; s__unclassified_Clostridia_UCG_014
ASV2615	7	1	0	0	k__Bacteria; p__Proteobacteria; c__Gammaproteobacteria; o__Burkholderiales; f__Burkholderiales_Incertae_Sedis; g__2013Ark19i; s__unclassified_2013Ark19i
ASV2617	0	16	1	0	k__Bacteria; p__Firmicutes; c__Clostridia; o__Lachnospirales; f__Lachnospiraceae; g__unclassified_Lachnospiraceae; s__unclassified_Lachnospiraceae
ASV2619	0	1	0	0	k__Bacteria; p__Firmicutes; c__Bacilli; o__Staphylococcales; f__Staphylococcaceae; g__Staphylococcus; s__unclassified_Staphylococcus
ASV2620	0	0	0	12	k__Bacteria; p__Bacteroidota; c__Bacteroidia; o__Bacteroidales; f__Marinifilaceae; g__Butyricimonas; s__unclassified_Butyricimonas
ASV2621	0	0	0	24	k__Bacteria; p__Firmicutes; c__Clostridia; o__Lachnospirales; f__Lachnospiraceae; g__unclassified_Lachnospiraceae; s__unclassified_Lachnospiraceae
ASV2622	0	0	21	5	k__Bacteria; p__Firmicutes; c__Clostridia; o__Lachnospirales; f__Lachnospiraceae; g__unclassified_Lachnospiraceae; s__unclassified_Lachnospiraceae
ASV2623	0	0	0	21	k__Bacteria; p__Firmicutes; c__Clostridia; o__Lachnospirales; f__Lachnospiraceae; g__unclassified_Lachnospiraceae; s__Clostridium_sp._Culture_41
ASV2624	0	0	30	0	k__Bacteria; p__Firmicutes; c__Clostridia; o__Lachnospirales; f__Lachnospiraceae; g__unclassified_Lachnospiraceae; s__unclassified_Lachnospiraceae
ASV2629	0	16	0	0	k__Bacteria; p__Firmicutes; c__Clostridia; o__Oscillospirales; f__Butyricicoccaceae; g__Butyricicoccus; s__unclassified_Butyricicoccus
ASV2632	0	17	0	0	k__Bacteria; p__Firmicutes; c__Clostridia; o__Clostridia_UCG_014; f__unclassified_Clostridia_UCG_014; g__unclassified_Clostridia_UCG_014; s__unclassified_Clostridia_UCG_014
ASV2638	0	39	0	0	k__Bacteria; p__Firmicutes; c__Bacilli; o__Erysipelotrichales; f__Erysipelotrichaceae; g__Dubosiella; s__unclassified_Dubosiella
ASV2640	2	16	0	0	k__Bacteria; p__Firmicutes; c__Clostridia; o__Oscillospirales; f__Butyricicoccaceae; g__UCG_009; s__unclassified_UCG_009
ASV2641	0	0	7	0	k__Bacteria; p__Firmicutes; c__Bacilli; o__RF39; f__unclassified_RF39; g__unclassified_RF39; s__unclassified_RF39
ASV2642	0	3	0	0	k__Bacteria; p__Firmicutes; c__Clostridia; o__Lachnospirales; f__Lachnospiraceae; g__unclassified_Lachnospiraceae; s__unclassified_Lachnospiraceae
ASV2644	0	0	5	0	k__Bacteria; p__Bacteroidota; c__Bacteroidia; o__Bacteroidales; f__Tannerellaceae; g__Parabacteroides; s__unclassified_Parabacteroides
ASV2645	0	0	0	20	k__Bacteria; p__Firmicutes; c__Clostridia; o__Lachnospirales; f__Lachnospiraceae; g__unclassified_Lachnospiraceae; s__unclassified_Lachnospiraceae
ASV2646	0	0	0	6	k__Bacteria; p__Firmicutes; c__Clostridia; o__Clostridia_UCG_014; f__unclassified_Clostridia_UCG_014; g__unclassified_Clostridia_UCG_014; s__unclassified_Clostridia_UCG_014
ASV2647	0	0	0	38	k__Bacteria; p__Firmicutes; c__Clostridia; o__Lachnospirales; f__Lachnospiraceae; g__unclassified_Lachnospiraceae; s__unclassified_Lachnospiraceae
ASV2648	0	0	0	38	k__Bacteria; p__Firmicutes; c__Clostridia; o__Lachnospirales; f__Lachnospiraceae; g__unclassified_Lachnospiraceae; s__unclassified_Lachnospiraceae
ASV2649	0	10	0	0	k__Bacteria; p__Firmicutes; c__Clostridia; o__Lachnospirales; f__Lachnospiraceae; g__Roseburia; s__uncultured_Clostridiales_bacterium
ASV2651	0	0	31	0	k__Bacteria; p__Firmicutes; c__Clostridia; o__Lachnospirales; f__Lachnospiraceae; g__GCA_900066575; s__unclassified_GCA_900066575
ASV2652	0	2	15	0	k__Bacteria; p__Firmicutes; c__Clostridia; o__Lachnospirales; f__Lachnospiraceae; g__Lachnospiraceae_NK4A136_group; s__uncultured_Clostridiales_bacterium
ASV2656	0	0	4	0	k__Bacteria; p__Proteobacteria; c__Gammaproteobacteria; o__Enterobacterales; f__Enterobacteriaceae; g__Escherichia_Shigella; s__unclassified_Escherichia_Shigella
ASV2659	0	24	0	0	k__Bacteria; p__Firmicutes; c__Clostridia; o__Christensenellales; f__Christensenellaceae; g__Christensenellaceae_R_7_group; s__unclassified_Christensenellaceae_R_7_group
ASV2661	0	7	0	0	k__Bacteria; p__Firmicutes; c__Bacilli; o__Staphylococcales; f__Staphylococcaceae; g__Jeotgalicoccus; s__unclassified_Jeotgalicoccus
ASV2666	10	0	0	15	k__Bacteria; p__Firmicutes; c__Clostridia; o__Lachnospirales; f__Lachnospiraceae; g__unclassified_Lachnospiraceae; s__unclassified_Lachnospiraceae
ASV2667	8	0	0	0	k__Bacteria; p__Firmicutes; c__Clostridia; o__Clostridia_vadinBB60_group; f__unclassified_Clostridia_vadinBB60_group; g__unclassified_Clostridia_vadinBB60_group; s__unclassified_Clostridia_vadinBB60_group
ASV2670	0	0	1	0	k__Bacteria; p__Proteobacteria; c__Gammaproteobacteria; o__Burkholderiales; f__Neisseriaceae; g__unclassified_Neisseriaceae; s__unclassified_Neisseriaceae
ASV2702	0	0	37	0	k__Bacteria; p__Firmicutes; c__Clostridia; o__Clostridia_UCG_014; f__unclassified_Clostridia_UCG_014; g__unclassified_Clostridia_UCG_014; s__unclassified_Clostridia_UCG_014
ASV2705	0	0	5	0	k__Bacteria; p__Firmicutes; c__Clostridia; o__Oscillospirales; f__Ruminococcaceae; g__unclassified_Ruminococcaceae; s__unclassified_Ruminococcaceae
ASV2706	6	0	0	2	k__Bacteria; p__Firmicutes; c__Clostridia; o__Lachnospirales; f__Lachnospiraceae; g__unclassified_Lachnospiraceae; s__unclassified_Lachnospiraceae
ASV2707	0	0	0	12	k__Bacteria; p__Firmicutes; c__Clostridia; o__Lachnospirales; f__Lachnospiraceae; g__GCA_900066575; s__unclassified_GCA_900066575
ASV2709	5	0	0	1	k__Bacteria; p__Desulfobacterota; c__Desulfovibrionia; o__Desulfovibrionales; f__Desulfovibrionaceae; g__unclassified_Desulfovibrionaceae; s__unclassified_Desulfovibrionaceae
ASV2710	4	0	0	0	k__Bacteria; p__Firmicutes; c__Clostridia; o__Oscillospirales; f__Ruminococcaceae; g__DTU089; s__unclassified_DTU089
ASV2711	0	5	0	0	k__Bacteria; p__Firmicutes; c__Clostridia; o__Lachnospirales; f__Lachnospiraceae; g__unclassified_Lachnospiraceae; s__unclassified_Lachnospiraceae
ASV2712	19	0	0	0	k__Bacteria; p__Bacteroidota; c__Bacteroidia; o__Bacteroidales; f__Muribaculaceae; g__unclassified_Muribaculaceae; s__unclassified_Muribaculaceae
ASV2713	9	0	0	0	k__Bacteria; p__Firmicutes; c__Bacilli; o__Lactobacillales; f__Carnobacteriaceae; g__Atopostipes; s__unclassified_Atopostipes
ASV2714	0	0	0	1	k__Bacteria; p__Bacteroidota; c__Bacteroidia; o__Bacteroidales; f__Rikenellaceae; g__Alistipes; s__unclassified_Alistipes
ASV2715	0	0	0	9	k__Bacteria; p__Bacteroidota; c__Bacteroidia; o__Bacteroidales; f__Muribaculaceae; g__unclassified_Muribaculaceae; s__unclassified_Muribaculaceae
ASV2717	30	0	0	0	k__Bacteria; p__Firmicutes; c__Clostridia; o__Oscillospirales; f__Oscillospiraceae; g__unclassified_Oscillospiraceae; s__unclassified_Oscillospiraceae
ASV2726	36	0	0	0	k__Bacteria; p__Bacteroidota; c__Bacteroidia; o__Bacteroidales; f__Muribaculaceae; g__unclassified_Muribaculaceae; s__unclassified_Muribaculaceae
ASV2727	36	0	0	0	k__Bacteria; p__Firmicutes; c__Clostridia; o__Clostridia_UCG_014; f__unclassified_Clostridia_UCG_014; g__unclassified_Clostridia_UCG_014; s__unclassified_Clostridia_UCG_014
ASV2730	0	19	0	0	k__Bacteria; p__Firmicutes; c__Clostridia; o__Monoglobales; f__Monoglobaceae; g__Monoglobus; s__unclassified_Monoglobus
ASV2735	0	36	0	0	k__Bacteria; p__Firmicutes; c__Clostridia; o__Oscillospirales; f__Oscillospiraceae; g__unclassified_Oscillospiraceae; s__unclassified_Oscillospiraceae
ASV2736	4	0	0	0	k__Bacteria; p__Firmicutes; c__Clostridia; o__Clostridia_vadinBB60_group; f__unclassified_Clostridia_vadinBB60_group; g__unclassified_Clostridia_vadinBB60_group; s__unclassified_Clostridia_vadinBB60_group
ASV2737	0	0	0	12	k__Bacteria; p__Bacteroidota; c__Bacteroidia; o__Bacteroidales; f__Muribaculaceae; g__unclassified_Muribaculaceae; s__unclassified_Muribaculaceae
ASV2738	0	4	0	0	k__Bacteria; p__Firmicutes; c__Clostridia; o__Oscillospirales; f__Ruminococcaceae; g__unclassified_Ruminococcaceae; s__unclassified_Ruminococcaceae
ASV2746	0	0	0	12	k__Bacteria; p__Firmicutes; c__Clostridia; o__Clostridia_vadinBB60_group; f__uncultured_Clostridiales_bacterium; g__uncultured_Clostridiales_bacterium; s__uncultured_Clostridiales_bacterium
ASV2750	0	3	6	3	k__Bacteria; p__Firmicutes; c__Clostridia; o__Lachnospirales; f__Lachnospiraceae; g__unclassified_Lachnospiraceae; s__unclassified_Lachnospiraceae
ASV2751	25	1	0	0	k__Bacteria; p__Firmicutes; c__Clostridia; o__Lachnospirales; f__Lachnospiraceae; g__unclassified_Lachnospiraceae; s__unclassified_Lachnospiraceae
ASV2752	7	0	0	0	k__Bacteria; p__Bacteroidota; c__Bacteroidia; o__Flavobacteriales; f__Flavobacteriaceae; g__Ulvibacter; s__unclassified_Ulvibacter
ASV2753	0	11	9	0	k__Bacteria; p__Firmicutes; c__Clostridia; o__Oscillospirales; f__Ruminococcaceae; g__unclassified_Ruminococcaceae; s__unclassified_Ruminococcaceae
ASV2756	0	5	0	0	k__Bacteria; p__Firmicutes; c__Bacilli; o__Lactobacillales; f__Streptococcaceae; g__Streptococcus; s__unclassified_Streptococcus
ASV2757	0	19	1	11	k__Bacteria; p__Firmicutes; c__Clostridia; o__Oscillospirales; f__Ruminococcaceae; g__unclassified_Ruminococcaceae; s__unclassified_Ruminococcaceae
ASV2758	0	0	0	35	k__Bacteria; p__Firmicutes; c__Clostridia; o__unclassified_Clostridia; f__unclassified_Clostridia; g__unclassified_Clostridia; s__unclassified_Clostridia
ASV2759	0	0	0	12	k__Bacteria; p__Firmicutes; c__Clostridia; o__Lachnospirales; f__Lachnospiraceae; g__unclassified_Lachnospiraceae; s__unclassified_Lachnospiraceae
ASV2767	27	0	0	0	k__Bacteria; p__Firmicutes; c__Clostridia; o__Oscillospirales; f__UCG_010; g__unclassified_UCG_010; s__unclassified_UCG_010
ASV2768	35	0	0	0	k__Bacteria; p__Firmicutes; c__Clostridia; o__Lachnospirales; f__Lachnospiraceae; g__unclassified_Lachnospiraceae; s__unclassified_Lachnospiraceae
ASV2769	35	0	0	0	k__Bacteria; p__Firmicutes; c__Clostridia; o__Clostridia_UCG_014; f__unclassified_Clostridia_UCG_014; g__unclassified_Clostridia_UCG_014; s__unclassified_Clostridia_UCG_014
ASV2772	0	2	0	0	k__Bacteria; p__Firmicutes; c__Clostridia; o__Oscillospirales; f__Ruminococcaceae; g__Incertae_Sedis; s__unclassified_Incertae_Sedis
ASV2777	0	0	0	31	k__Bacteria; p__Firmicutes; c__Bacilli; o__RF39; f__unclassified_RF39; g__unclassified_RF39; s__unclassified_RF39
ASV2779	0	0	1	0	k__Bacteria; p__Firmicutes; c__Clostridia; o__Oscillospirales; f__Ruminococcaceae; g__[Eubacterium]_siraeum_group; s__unclassified_[Eubacterium]_siraeum_group
ASV2780	0	2	0	0	k__Bacteria; p__Firmicutes; c__Clostridia; o__Oscillospirales; f__Oscillospiraceae; g__unclassified_Oscillospiraceae; s__unclassified_Oscillospiraceae
ASV2783	0	9	0	0	k__Bacteria; p__Firmicutes; c__Clostridia; o__Lachnospirales; f__Lachnospiraceae; g__Lachnospiraceae_NK4A136_group; s__unclassified_Lachnospiraceae_NK4A136_group
ASV2786	0	0	0	1	k__Bacteria; p__Firmicutes; c__Clostridia; o__Eubacteriales; f__Anaerofustaceae; g__Anaerofustis; s__unclassified_Anaerofustis
ASV2787	21	0	0	3	k__Bacteria; p__Firmicutes; c__Clostridia; o__Oscillospirales; f__UCG_010; g__unclassified_UCG_010; s__unclassified_UCG_010
ASV2788	0	0	0	8	k__Bacteria; p__Firmicutes; c__Bacilli; o__Lactobacillales; f__Lactobacillaceae; g__Lactobacillus; s__unclassified_Lactobacillus
ASV2789	1	2	0	0	k__Bacteria; p__Bacteroidota; c__Bacteroidia; o__Bacteroidales; f__Prevotellaceae; g__Alloprevotella; s__uncultured_Bacteroidales_bacterium
ASV2801	18	0	0	0	k__Bacteria; p__Firmicutes; c__Clostridia; o__Peptococcales; f__Peptococcaceae; g__unclassified_Peptococcaceae; s__unclassified_Peptococcaceae
ASV2811	0	0	34	0	k__Bacteria; p__Firmicutes; c__Clostridia; o__Clostridia_UCG_014; f__unclassified_Clostridia_UCG_014; g__unclassified_Clostridia_UCG_014; s__unclassified_Clostridia_UCG_014
ASV2812	0	0	34	0	k__Bacteria; p__Firmicutes; c__Clostridia; o__Clostridia_UCG_014; f__unclassified_Clostridia_UCG_014; g__unclassified_Clostridia_UCG_014; s__unclassified_Clostridia_UCG_014
ASV2813	0	34	0	0	k__Bacteria; p__Cyanobacteria; c__Vampirivibrionia; o__Gastranaerophilales; f__unclassified_Gastranaerophilales; g__unclassified_Gastranaerophilales; s__unclassified_Gastranaerophilales
ASV2814	7	0	0	3	k__Bacteria; p__Firmicutes; c__Clostridia; o__Lachnospirales; f__Lachnospiraceae; g__unclassified_Lachnospiraceae; s__unclassified_Lachnospiraceae
ASV2816	0	1	8	7	k__Bacteria; p__Bacteroidota; c__Bacteroidia; o__Bacteroidales; f__Muribaculaceae; g__unclassified_Muribaculaceae; s__unclassified_Muribaculaceae
ASV2818	0	0	2	1	k__Bacteria; p__Bacteroidota; c__Bacteroidia; o__Bacteroidales; f__Muribaculaceae; g__unclassified_Muribaculaceae; s__unclassified_Muribaculaceae
ASV2819	0	0	1	0	k__Bacteria; p__Bacteroidota; c__Bacteroidia; o__Cytophagales; f__Amoebophilaceae; g__Candidatus_Amoebophilus; s__unclassified_Candidatus_Amoebophilus
ASV2820	2	0	0	2	k__Bacteria; p__Firmicutes; c__Clostridia; o__Oscillospirales; f__Ruminococcaceae; g__Harryflintia; s__unclassified_Harryflintia
ASV2825	0	0	0	33	k__Bacteria; p__Firmicutes; c__Clostridia; o__Clostridia_UCG_014; f__unclassified_Clostridia_UCG_014; g__unclassified_Clostridia_UCG_014; s__unclassified_Clostridia_UCG_014
ASV2826	0	1	13	0	k__Bacteria; p__Firmicutes; c__Bacilli; o__Lactobacillales; f__Streptococcaceae; g__Streptococcus; s__unclassified_Streptococcus
ASV2834	14	5	0	0	k__Bacteria; p__Firmicutes; c__Clostridia; o__Clostridia_vadinBB60_group; f__uncultured_Clostridiales_bacterium; g__uncultured_Clostridiales_bacterium; s__uncultured_Clostridiales_bacterium
ASV2841	0	0	24	0	k__Bacteria; p__Firmicutes; c__Clostridia; o__Oscillospirales; f__Ruminococcaceae; g__Incertae_Sedis; s__unclassified_Incertae_Sedis
ASV2842	0	33	0	0	k__Bacteria; p__Firmicutes; c__Clostridia; o__Clostridia_UCG_014; f__unclassified_Clostridia_UCG_014; g__unclassified_Clostridia_UCG_014; s__unclassified_Clostridia_UCG_014
ASV2843	0	0	0	2	k__Bacteria; p__Bacteroidota; c__Bacteroidia; o__Bacteroidales; f__Bacteroidaceae; g__Bacteroides; s__unclassified_Bacteroides
ASV2846	0	0	0	2	k__Bacteria; p__Firmicutes; c__Clostridia; o__Oscillospirales; f__Ruminococcaceae; g__Paludicola; s__unclassified_Paludicola
ASV2847	0	0	0	4	k__Bacteria; p__Bacteroidota; c__Bacteroidia; o__Bacteroidales; f__Rikenellaceae; g__Alistipes; s__Alistipes_indistinctus
ASV2848	0	1	0	0	k__Bacteria; p__Firmicutes; c__Clostridia; o__Lachnospirales; f__Lachnospiraceae; g__unclassified_Lachnospiraceae; s__unclassified_Lachnospiraceae
ASV2849	7	0	0	0	k__Bacteria; p__Firmicutes; c__Clostridia; o__Clostridia_vadinBB60_group; f__unclassified_Clostridia_vadinBB60_group; g__unclassified_Clostridia_vadinBB60_group; s__unclassified_Clostridia_vadinBB60_group
ASV2851	8	16	0	0	k__Bacteria; p__Firmicutes; c__Clostridia; o__Lachnospirales; f__Lachnospiraceae; g__unclassified_Lachnospiraceae; s__unclassified_Lachnospiraceae
ASV2852	0	0	1	0	k__Bacteria; p__Bacteroidota; c__Bacteroidia; o__Bacteroidales; f__Muribaculaceae; g__unclassified_Muribaculaceae; s__unclassified_Muribaculaceae
ASV2854	1	0	0	0	k__Bacteria; p__Firmicutes; c__Clostridia; o__Oscillospirales; f__unclassified_Oscillospirales; g__unclassified_Oscillospirales; s__unclassified_Oscillospirales
ASV2857	0	17	0	0	k__Bacteria; p__Firmicutes; c__Clostridia; o__Lachnospirales; f__Lachnospiraceae; g__unclassified_Lachnospiraceae; s__unclassified_Lachnospiraceae
ASV2859	2	5	0	0	k__Bacteria; p__Firmicutes; c__Clostridia; o__Lachnospirales; f__Lachnospiraceae; g__unclassified_Lachnospiraceae; s__unclassified_Lachnospiraceae
ASV2873	0	0	6	0	k__Bacteria; p__Firmicutes; c__Clostridia; o__Oscillospirales; f__Oscillospiraceae; g__UCG_005; s__unclassified_UCG_005
ASV2876	0	20	0	0	k__Bacteria; p__Firmicutes; c__Clostridia; o__Clostridia_vadinBB60_group; f__uncultured_Clostridia_bacterium; g__uncultured_Clostridia_bacterium; s__uncultured_Clostridia_bacterium
ASV2885	0	24	0	0	k__Bacteria; p__Firmicutes; c__Clostridia; o__Lachnospirales; f__Lachnospiraceae; g__unclassified_Lachnospiraceae; s__unclassified_Lachnospiraceae
ASV2888	4	2	1	0	k__Bacteria; p__Bacteroidota; c__Bacteroidia; o__Bacteroidales; f__Muribaculaceae; g__unclassified_Muribaculaceae; s__unclassified_Muribaculaceae
ASV2889	0	7	0	0	k__Bacteria; p__Cyanobacteria; c__Vampirivibrionia; o__Gastranaerophilales; f__uncultured_rumen_bacterium; g__uncultured_rumen_bacterium; s__uncultured_rumen_bacterium
ASV2897	0	0	3	4	k__Bacteria; p__Bacteroidota; c__Bacteroidia; o__Bacteroidales; f__unclassified_Bacteroidales; g__unclassified_Bacteroidales; s__unclassified_Bacteroidales
ASV2898	0	0	0	2	k__Bacteria; p__Bacteroidota; c__Bacteroidia; o__Bacteroidales; f__Tannerellaceae; g__Parabacteroides; s__unclassified_Parabacteroides
ASV2899	0	3	4	0	k__Bacteria; p__Bacteroidota; c__Bacteroidia; o__Bacteroidales; f__Muribaculaceae; g__unclassified_Muribaculaceae; s__unclassified_Muribaculaceae
ASV2901	0	0	0	17	k__Bacteria; p__Firmicutes; c__Clostridia; o__Peptostreptococcales_Tissierellales; f__Anaerovoracaceae; g__Family_XIII_AD3011_group; s__unclassified_Family_XIII_AD3011_group
ASV2902	0	0	0	15	k__Bacteria; p__Firmicutes; c__Clostridia; o__Lachnospirales; f__Lachnospiraceae; g__Lachnospiraceae_NK4A136_group; s__unclassified_Lachnospiraceae_NK4A136_group
ASV2904	0	8	2	0	k__Bacteria; p__Firmicutes; c__Clostridia; o__Christensenellales; f__Christensenellaceae; g__unclassified_Christensenellaceae; s__unclassified_Christensenellaceae
[truncated: 3,393 more rows]

## Sheet: bray_curtis_cluster
(((Normal1:0.251962519368,Normal2:0.251962519368):0.0152713086947,(Normal4:0.228123585156,Normal5:0.228123585156):0.0391102429067):0.0955106810411,((((Normal3:0.293650370577,((HATFP3:0.254148035659,HATFP4:0.254148035659):0.0156404994227,HATFP7:0.269788535082):0.023861835495):0.0219425139498,((LATFP1:0.285140828833,LATFP3:0.285140828833):0.0237627752001,(LATFP2:0.294258901852,((LATFP5:0.2568633454…

[truncated: 4 more sheets: all sample.phylum.bar, all sample.genus.bar, correlation1, correlation 2]
