# Supplementary material for: A polysaccharide from Allium tenuissimum L. flowers relieves ulcerative colitis by regulating the inflammatory signaling pathway and gut microbiota
Source: Royal Society of Chemistry journal article supplement (doi:10.1039/d3fo01253k), 2023-01-01
Supplement: d3fo01253k4.pdf [file d3fo01253k4.pdf]

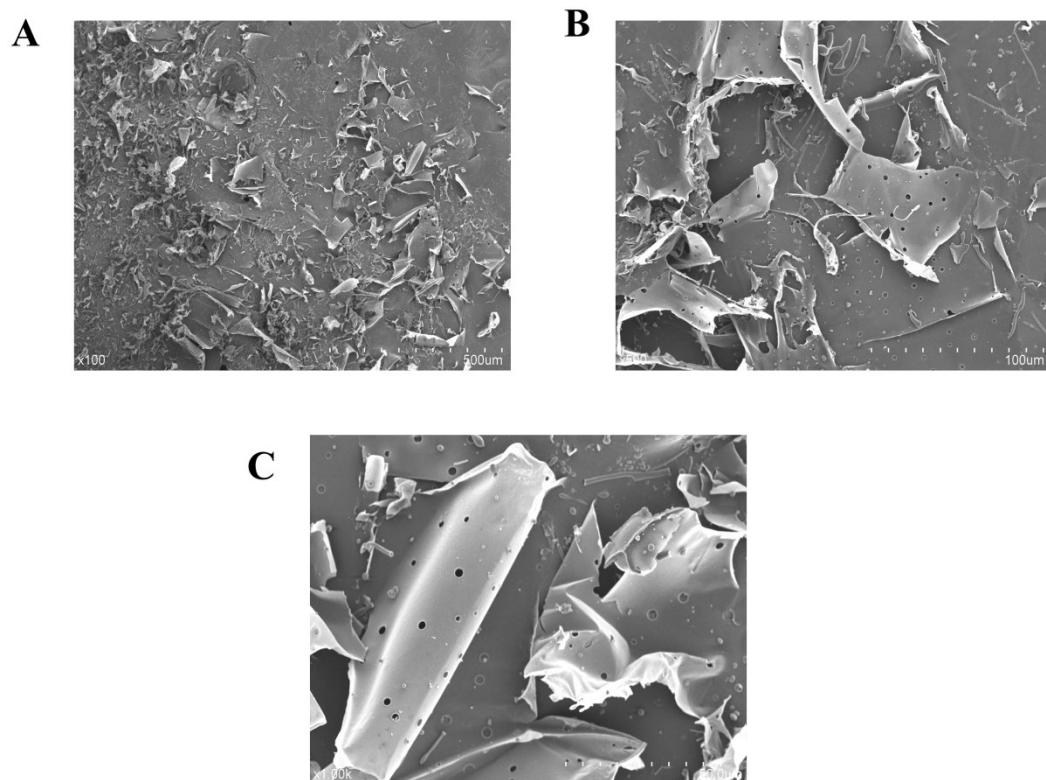

**Fig. 1** The SEM diagrams of ATPF. (A)  $\times 100$ . (B)  $\times 500$ . (C)  $\times 1000$ .

---

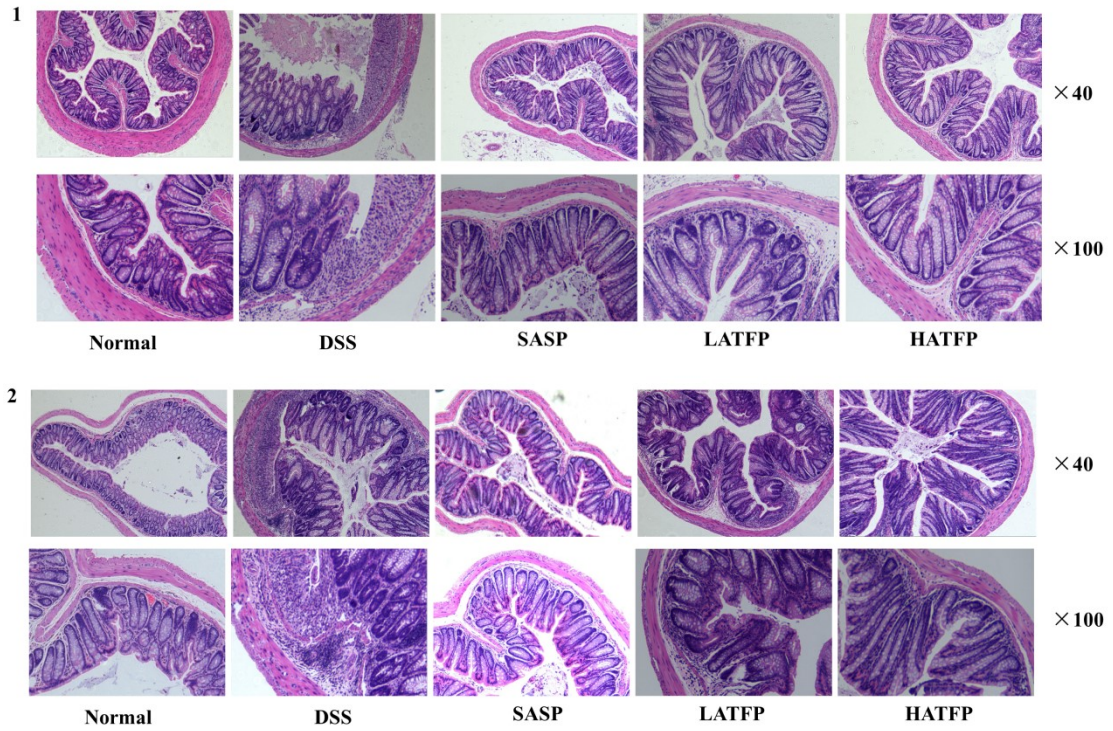

Fig. 2 H&E staining of colonic tissue from two rats in each group.
