# Supplementary material for: A polysaccharide from Allium tenuissimum L. flowers relieves ulcerative colitis by regulating the inflammatory signaling pathway and gut microbiota
Source: Royal Society of Chemistry journal article supplement (doi:10.1039/d3fo01253k), 2023-01-01
Supplement: d3fo01253k5.xlsx [file d3fo01253k5.xlsx]

## Sheet: Elution curve
Tuble number	Absorbance
1	0.013
2	-0.018
3	-0.017
4	0.001
5	-0.022
6	-0.008
7	-0.015
8	0.001
9	-0.015
10	-0.013
11	0.021
12	0.316
13	1.88
14	3.604
15	3.418
16	1.456
17	0.8
18	0.574
19	0.428
20	0.359
21	0.293
22	0.285
23	0.296
24	0.373
25	0.28
26	0.271
27	0.208
28	0.195
29	0.13
30	0.102
31	0.059
32	0.093
33	0.049
34	0.118
35	0.036
36	0.041
37	0.033
38	0.042
39	0.034
40	0.033
41	0.023
42	0.025
43	0.029
44	0.025
45	0.031
46	0.025
47	0.132
48	0.114
49	0.092
50	0.236
51	0.088
52	0.091
53	-0.06
54	-0.061
55	-0.057
56	-0.047
57	-0.054
58	-0.053
59	-0.048
60	-0.054

## Sheet: HPLC
Retention time (min)	Response value (nRIU)
0	0
0.36811	83.8806
0.64996	83.8806
0.93181	83.8806
1.21366	83.8806
1.49551	83.8806
1.77737	83.8806
2.05922	83.8806
2.34107	83.8806
2.62292	83.8806
2.90477	83.8806
3.18662	83.8806
3.46847	83.8806
3.75032	83.8806
4.03218	83.8806
4.31403	83.8806
4.59588	83.8806
4.87773	83.8806
5.15958	83.8806
5.44143	83.8806
5.72328	83.8806
6.00514	83.8806
6.28699	83.8806
6.56884	83.8806
6.85069	83.8806
7.13254	164.08
7.30165	444.776
7.41439	805.672
7.44258	925.97
7.47076	1166.57
7.52713	1567.56
7.55532	1968.56
7.5835	2369.55
7.61169	2770.55
7.63987	3171.54
7.66806	3572.54
7.66806	3732.94
7.66806	3973.53
7.69624	4374.53
7.69624	4534.93
7.72443	5176.52
7.75261	5577.51
7.75261	5978.51
7.7808	6379.5
7.7808	6780.5
7.80898	7181.49
7.80898	7582.49
7.83717	7983.48
7.83717	8264.18
7.86535	8785.47
7.86535	9186.47
7.89354	9507.26
7.92172	10189
7.92172	10590
7.94991	10990.9
7.9781	11391.9
7.9781	11873.1
8.00628	12193.9
8.00628	12594.9
8.06265	12995.9
8.09084	13356.8
8.20358	12955.8
8.23176	12554.8
8.23176	12153.8
8.25995	11752.8
8.25995	11111.2
8.25995	11512.2
8.28813	10590
8.28813	10189
8.31632	9787.96
8.31632	9386.97
8.31632	8985.97
8.3445	8584.98
8.3445	8183.98
8.37269	7782.99
8.37269	7381.99
8.40087	6981
8.40087	6580
8.42906	6179
8.42906	5778.01
8.45724	5377.01
8.48543	4976.02
8.48543	4575.02
8.51361	4174.03
8.5418	3291.84
8.5418	3372.04
8.56998	2890.85
8.59817	2489.85
8.62635	2088.86
8.65454	1687.86
8.68272	1326.97
8.76728	925.97
8.9082	605.174
9.02095	404.677
9.3028	284.378
9.58465	204.179
9.8665	164.08
10.1484	164.08
10.4302	164.08
10.712	123.98
10.9939	123.98
11.2758	123.98
11.5576	123.98
11.8395	123.98
12.1213	123.98
12.4032	123.98
12.685	123.98
12.9669	123.98
13.2487	123.98
13.5306	123.98
13.8124	123.98
14.0943	83.8806
14.3761	83.8806
14.658	83.8806
14.9398	83.8806
15.2217	83.8806
15.5035	83.8806
15.7854	83.8806
16.0672	83.8806
16.3491	83.8806
16.6309	83.8806
17.1946	43.7811
17.4765	43.7811
17.7583	43.7811
18.4066	43.7811
18.6884	43.7811
18.9421	43.7811
20	43.7811

## Sheet: UV full wavelength scan
Wavelength (nm)	Absorbance
200	1.972
210	1.073
220	0.508
230	0.27
240	0.158
250	0.129
260	0.113
270	0.105
280	0.096
290	0.083
300	0.073
310	0.068
320	0.064
330	0.06
340	0.057
350	0.054
360	0.052
370	0.05
380	0.048
390	0.046
400	0.045

## Sheet: Congo Red experiment
	λmax (nm)
NaOH Concentration (mg/mL)	Congo Red	Congo Red+ATFP
0	499	507
0.1	493	518
0.2	490	521
0.3	486	515
0.4	481	512
0.5	478	509

## Sheet: I2-KI
Wavenumber (nm)	Absorbance
300.227	1.6173
301.355	1.44569
303.611	1.30081
305.866	1.18146
307.37	1.06983
309.626	0.98848
312.258	0.92673
314.138	0.86676
315.642	0.83113
317.898	0.79788
320.248	0.78601
322.128	0.78601
324.008	0.79788
327.768	0.84538
328.584	0.89147
328.986	0.88639
329.388	0.88385
329.648	0.88635
329.79	0.89528
329.79	0.89655
330.795	0.8902
330.795	0.91942
330.996	0.91561
332.002	0.92577
333.783	0.95345
336.039	0.99145
337.919	1.02708
339.799	1.06271
343.935	1.1203
346.567	1.1393
347.695	1.1583
350.045	1.16543
352.301	1.16068
353.805	1.15355
356.06	1.13455
358.316	1.11555
360.196	1.08171
361.324	1.05083
363.204	1.01995
365.836	0.97008
368.092	0.92732
369.596	0.87448
371.852	0.82698
373.732	0.78185
375.988	0.73435
377.586	0.68388
379.842	0.64587
381.721	0.596
383.977	0.54849
385.857	0.5099
388.113	0.47427
389.993	0.44102
391.116	0.40618
391.318	0.41253
391.72	0.39983
392.122	0.4011
392.725	0.41507
393.127	0.40491
393.377	0.37927
395.257	0.35552
397.889	0.33117
400.145	0.30742
400.165	0.28549
400.969	0.29311
401.371	0.28041
402.175	0.28168
402.175	0.29438
402.401	0.28604
402.577	0.28041
402.98	0.28549
402.98	0.27025
402.98	0.27533
403.181	0.26644
403.181	0.26135
403.905	0.27179
404.186	0.27787
404.789	0.27406
404.789	0.26008
404.789	0.25246
404.99	0.27025
404.99	0.24992
405.191	0.25881
405.795	0.24738
406.161	0.25279
406.197	0.25627
406.398	0.24865
406.398	0.23722
407.001	0.24611
407.403	0.23086
407.805	0.22578
408.006	0.24484
408.134	0.23379
408.409	0.2423
408.61	0.22451
409.012	0.21943
409.012	0.23722
409.816	0.22705
410.218	0.21181
410.419	0.22197
411.224	0.21816
411.224	0.20673
411.518	0.21241
412.028	0.22197
412.43	0.20419
412.832	0.21054
413.234	0.1991
414.038	0.19148
414.038	0.19783
414.441	0.18894
415.278	0.19579
415.446	0.18894
416.049	0.19021
416.25	0.1864
416.25	0.18386
416.652	0.18132
417.256	0.19275
417.457	0.17878
417.658	0.18132
417.91	0.18391
418.261	0.18386
418.462	0.1737
418.864	0.17243
419.266	0.17751
419.87	0.16989
420.473	0.17751
421.88	0.17878
422.886	0.16353
424.293	0.17116
424.293	0.1648
425.5	0.17116
426.304	0.15845
426.505	0.16353
426.907	0.16226
428.516	0.16226
428.918	0.15718
429.119	0.1521
429.521	0.14448
431.129	0.14448
431.532	0.14448
434.347	0.14575
434.548	0.14194
435.352	0.14321
436.357	0.13686
436.961	0.13558
438.77	0.13813
439.172	0.13304
441.183	0.1305
442.389	0.1305
443.998	0.12669
445.003	0.1178
446.21	0.12161
448.083	0.10969
454.099	0.10257
456.73	0.09782
460.49	0.08594
466.224	0.08356
469.608	0.07644
475.248	0.07169
480.136	0.06931
485.023	0.06159
491.039	0.06397
497.901	0.05684
503.165	0.05209
508.804	0.05447
512.94	0.05447
517.452	0.04972
521.212	0.05209
528.074	0.04734
535.217	0.05209
541.985	0.04497
550.257	0.04734
561.63	0.04497
568.774	0.04259
580.054	0.04022
588.419	0.04022
591.803	0.04259
600.075	0.03784
606.843	0.04734
610.602	0.03784
619.344	0.04022
624.232	0.04022
630.248	0.04022
633.631	0.03784
638.143	0.04259
641.151	0.03784
648.389	0.04022
656.285	0.04022
662.676	0.03784
667.564	0.03784
670.196	0.03547
674.05	0.03784
677.434	0.03784
680.818	0.03784
684.577	0.03784
687.209	0.03784
690.217	0.03547
693.225	0.03784
695.857	0.03547
698.489	0.03784
700.369	0.03547

## Sheet: Monosaccharide composition
Raw Data
Monosaccharide standards				ATFP
Time(min)	Step(sec)	Value(nC)		Time(min)	Step(sec)	Value(nC)
0.000333	0	-0.01185		0.000167	0	0.00365
0.001167	0.05	-0.0119		0.001	0.05	0.01195
0.002	0.05	-0.0118		0.001833	0.05	0.02225
0.002833	0.05	-0.01165		0.002667	0.05	0.02725
0.003667	0.05	-0.01135		0.0035	0.05	0.02945
0.0045	0.05	-0.01095		0.004333	0.05	0.02925
0.005333	0.05	-0.0105		0.005167	0.05	0.0262
0.006167	0.05	-0.0099		0.006	0.05	0.02075
0.007	0.05	-0.0092		0.006833	0.05	0.0125
0.007833	0.05	-0.00845		0.007667	0.05	0.0018
0.008667	0.05	-0.00815		0.0085	0.05	-0.0045
0.0095	0.05	-0.0081		0.009333	0.05	-0.0045
0.010333	0.05	-0.0081		0.010167	0.05	-0.0044
0.011167	0.05	-0.0082		0.011	0.05	-0.0043
0.012	0.05	-0.0083		0.011833	0.05	-0.00415
0.012833	0.05	-0.0085		0.012667	0.05	-0.0039
0.013667	0.05	-0.0087		0.0135	0.05	-0.0036
0.0145	0.05	-0.009		0.014333	0.05	-0.0033
0.015333	0.05	-0.0093		0.015167	0.05	-0.00285
0.016167	0.05	-0.0097		0.016	0.05	-0.00245
0.017	0.05	-0.0101		0.016833	0.05	-0.00215
0.017833	0.05	-0.01055		0.017667	0.05	-0.00215
0.018667	0.05	-0.01105		0.0185	0.05	-0.00215
0.0195	0.05	-0.01155		0.019333	0.05	-0.0022
0.020333	0.05	-0.01215		0.020167	0.05	-0.00225
0.021167	0.05	-0.01275		0.021	0.05	-0.00235
0.022	0.05	-0.01345		0.021833	0.05	-0.0025
0.022833	0.05	-0.01415		0.022667	0.05	-0.0027
0.023667	0.05	-0.0149		0.0235	0.05	-0.0029
0.0245	0.05	-0.0157		0.024333	0.05	-0.00315
0.025333	0.05	-0.01635		0.025167	0.05	-0.0034
0.026167	0.05	-0.0169		0.026	0.05	-0.0036
0.027	0.05	-0.01745		0.026833	0.05	-0.00385
0.027833	0.05	-0.01805		0.027667	0.05	-0.0041
0.028667	0.05	-0.01855		0.0285	0.05	-0.00435
0.0295	0.05	-0.0191		0.029333	0.05	-0.00465
0.030333	0.05	-0.01965		0.030167	0.05	-0.00495
0.031167	0.05	-0.0202		0.031	0.05	-0.0053
0.032	0.05	-0.0207		0.031833	0.05	-0.00565
0.032833	0.05	-0.02125		0.032667	0.05	-0.006
0.033667	0.05	-0.02175		0.0335	0.05	-0.0063
0.0345	0.05	-0.0223		0.034333	0.05	-0.0066
0.035333	0.05	-0.0228		0.035167	0.05	-0.0069
0.036167	0.05	-0.0233		0.036	0.05	-0.00715
0.037	0.05	-0.02385		0.036833	0.05	-0.00745
0.037833	0.05	-0.02435		0.037667	0.05	-0.00775
0.038667	0.05	-0.02485		0.0385	0.05	-0.008
0.0395	0.05	-0.02535		0.039333	0.05	-0.0083
0.040333	0.05	-0.02585		0.040167	0.05	-0.00855
0.041167	0.05	-0.02635		0.041	0.05	-0.00885
0.042	0.05	-0.02685		0.041833	0.05	-0.00915
0.042833	0.05	-0.02745		0.042667	0.05	-0.00945
0.043667	0.05	-0.028		0.0435	0.05	-0.00975
0.0445	0.05	-0.02855		0.044333	0.05	-0.01005
0.045333	0.05	-0.02915		0.045167	0.05	-0.0104
0.046167	0.05	-0.02975		0.046	0.05	-0.0107
0.047	0.05	-0.03035		0.046833	0.05	-0.01105
0.047833	0.05	-0.03095		0.047667	0.05	-0.0114
0.048667	0.05	-0.03155		0.0485	0.05	-0.0117
0.0495	0.05	-0.0322		0.049333	0.05	-0.01205
0.050333	0.05	-0.0326		0.050167	0.05	-0.0123
0.051167	0.05	-0.03295		0.051	0.05	-0.01245
0.052	0.05	-0.0332		0.051833	0.05	-0.01255
0.052833	0.05	-0.03345		0.052667	0.05	-0.01265
0.053667	0.05	-0.0336		0.0535	0.05	-0.0127
0.0545	0.05	-0.03375		0.054333	0.05	-0.01275
0.055333	0.05	-0.03385		0.055167	0.05	-0.0127
0.056167	0.05	-0.0339		0.056	0.05	-0.01265
0.057	0.05	-0.0339		0.056833	0.05	-0.0126
0.057833	0.05	-0.03385		0.057667	0.05	-0.0125
0.058667	0.05	-0.0338		0.0585	0.05	-0.0124
0.0595	0.05	-0.03375		0.059333	0.05	-0.01235
0.060333	0.05	-0.03365		0.060167	0.05	-0.0123
0.061167	0.05	-0.0335		0.061	0.05	-0.01225
0.062	0.05	-0.03335		0.061833	0.05	-0.01215
0.062833	0.05	-0.03315		0.062667	0.05	-0.01205
0.063667	0.05	-0.0329		0.0635	0.05	-0.01195
0.0645	0.05	-0.03265		0.064333	0.05	-0.01185
0.065333	0.05	-0.03235		0.065167	0.05	-0.01175
0.066167	0.05	-0.03205		0.066	0.05	-0.0116
0.067	0.05	-0.03185		0.066833	0.05	-0.0115
0.067833	0.05	-0.0318		0.067667	0.05	-0.01135
0.068667	0.05	-0.03175		0.0685	0.05	-0.01125
0.0695	0.05	-0.03175		0.069333	0.05	-0.01115
0.070333	0.05	-0.03175		0.070167	0.05	-0.011
0.071167	0.05	-0.0318		0.071	0.05	-0.01085
0.072	0.05	-0.0318		0.071833	0.05	-0.01075
0.072833	0.05	-0.03185		0.072667	0.05	-0.0106
0.073667	0.05	-0.03195		0.0735	0.05	-0.01045
0.0745	0.05	-0.03205		0.074333	0.05	-0.0103
0.075333	0.05	-0.03225		0.075167	0.05	-0.0102
0.076167	0.05	-0.0325		0.076	0.05	-0.0102
0.077	0.05	-0.0328		0.076833	0.05	-0.0102
0.077833	0.05	-0.03315		0.077667	0.05	-0.0102
0.078667	0.05	-0.03355		0.0785	0.05	-0.01025
0.0795	0.05	-0.03395		0.079333	0.05	-0.0103
0.080333	0.05	-0.03445		0.080167	0.05	-0.01035
0.081167	0.05	-0.03495		0.081	0.05	-0.01045
0.082	0.05	-0.03545		0.081833	0.05	-0.01055
0.082833	0.05	-0.03605		0.082667	0.05	-0.01065
0.083667	0.05	-0.0366		0.0835	0.05	-0.01085
0.0845	0.05	-0.0372		0.084333	0.05	-0.01105
0.085333	0.05	-0.0378		0.085167	0.05	-0.0113
0.086167	0.05	-0.03845		0.086	0.05	-0.0116
0.087	0.05	-0.0391		0.086833	0.05	-0.0119
0.087833	0.05	-0.0398		0.087667	0.05	-0.01225
0.088667	0.05	-0.0405		0.0885	0.05	-0.01265
0.0895	0.05	-0.04125		0.089333	0.05	-0.01305
0.090333	0.05	-0.04205		0.090167	0.05	-0.01345
0.091167	0.05	-0.04285		0.091	0.05	-0.01395
0.092	0.05	-0.0436		0.091833	0.05	-0.0144
0.092833	0.05	-0.04435		0.092667	0.05	-0.01485
0.093667	0.05	-0.0451		0.0935	0.05	-0.0153
0.0945	0.05	-0.04585		0.094333	0.05	-0.01575
0.095333	0.05	-0.04665		0.095167	0.05	-0.01625
0.096167	0.05	-0.04745		0.096	0.05	-0.01675
0.097	0.05	-0.04825		0.096833	0.05	-0.01725
0.097833	0.05	-0.04905		0.097667	0.05	-0.01775
0.098667	0.05	-0.04985		0.0985	0.05	-0.0183
0.0995	0.05	-0.0507		0.099333	0.05	-0.01885
0.100333	0.05	-0.0515		0.100167	0.05	-0.0194
0.101167	0.05	-0.0523		0.101	0.05	-0.01985
0.102	0.05	-0.0531		0.101833	0.05	-0.02035
0.102833	0.05	-0.0539		0.102667	0.05	-0.0208
0.103667	0.05	-0.0547		0.1035	0.05	-0.02125
0.1045	0.05	-0.0555		0.104333	0.05	-0.02175
0.105333	0.05	-0.0563		0.105167	0.05	-0.0222
0.106167	0.05	-0.0571		0.106	0.05	-0.02265
0.107	0.05	-0.0579		0.106833	0.05	-0.0231
0.107833	0.05	-0.05875		0.107667	0.05	-0.02355
0.108667	0.05	-0.05955		0.1085	0.05	-0.02405
0.1095	0.05	-0.0604		0.109333	0.05	-0.02455
0.110333	0.05	-0.0612		0.110167	0.05	-0.02505
0.111167	0.05	-0.06205		0.111	0.05	-0.02555
0.112	0.05	-0.06285		0.111833	0.05	-0.02605
0.112833	0.05	-0.0637		0.112667	0.05	-0.02655
0.113667	0.05	-0.06455		0.1135	0.05	-0.02705
0.1145	0.05	-0.0654		0.114333	0.05	-0.0276
0.115333	0.05	-0.0662		0.115167	0.05	-0.0281
0.116167	0.05	-0.0671		0.116	0.05	-0.02865
0.117	0.05	-0.06785		0.116833	0.05	-0.029
0.117833	0.05	-0.06855		0.117667	0.05	-0.02925
0.118667	0.05	-0.0692		0.1185	0.05	-0.0294
0.1195	0.05	-0.0699		0.119333	0.05	-0.02955
0.120333	0.05	-0.0705		0.120167	0.05	-0.0296
0.121167	0.05	-0.07115		0.121	0.05	-0.02965
0.122	0.05	-0.0717		0.121833	0.05	-0.0296
0.122833	0.05	-0.0723		0.122667	0.05	-0.02955
0.123667	0.05	-0.07285		0.1235	0.05	-0.02945
0.1245	0.05	-0.0734		0.124333	0.05	-0.0293
0.125333	0.05	-0.074		0.125167	0.05	-0.0293
0.126167	0.05	-0.07465		0.126	0.05	-0.02965
0.127	0.05	-0.0753		0.126833	0.05	-0.03
0.127833	0.05	-0.076		0.127667	0.05	-0.0304
0.128667	0.05	-0.07665		0.1285	0.05	-0.03085
0.1295	0.05	-0.07735		0.129333	0.05	-0.03135
0.130333	0.05	-0.078		0.130167	0.05	-0.0319
0.131167	0.05	-0.0787		0.131	0.05	-0.0325
0.132	0.05	-0.0794		0.131833	0.05	-0.03315
0.132833	0.05	-0.0801		0.132667	0.05	-0.0338
0.133667	0.05	-0.0808		0.1335	0.05	-0.0344
0.1345	0.05	-0.0815		0.134333	0.05	-0.0348
0.135333	0.05	-0.0822		0.135167	0.05	-0.03515
0.136167	0.05	-0.08285		0.136	0.05	-0.0355
0.137	0.05	-0.08355		0.136833	0.05	-0.03585
0.137833	0.05	-0.08425		0.137667	0.05	-0.0362
0.138667	0.05	-0.0849		0.1385	0.05	-0.0365
0.1395	0.05	-0.0856		0.139333	0.05	-0.0368
0.140333	0.05	-0.0863		0.140167	0.05	-0.03705
0.141167	0.05	-0.087		0.141	0.05	-0.0373
0.142	0.05	-0.0876		0.141833	0.05	-0.0376
0.142833	0.05	-0.08825		0.142667	0.05	-0.03785
0.143667	0.05	-0.0888		0.1435	0.05	-0.03815
0.1445	0.05	-0.0894		0.144333	0.05	-0.0384
0.145333	0.05	-0.09		0.145167	0.05	-0.0387
0.146167	0.05	-0.09055		0.146	0.05	-0.03895
0.147	0.05	-0.0911		0.146833	0.05	-0.0392
0.147833	0.05	-0.09165		0.147667	0.05	-0.03945
0.148667	0.05	-0.09215		0.1485	0.05	-0.0397
0.1495	0.05	-0.0927		0.149333	0.05	-0.03995
0.150333	0.05	-0.09325		0.150167	0.05	-0.0402
0.151167	0.05	-0.0938		0.151	0.05	-0.04045
0.152	0.05	-0.0944		0.151833	0.05	-0.04065
0.152833	0.05	-0.09495		0.152667	0.05	-0.0409
0.153667	0.05	-0.09555		0.1535	0.05	-0.0411
0.1545	0.05	-0.09615		0.154333	0.05	-0.0413
0.155333	0.05	-0.0967		0.155167	0.05	-0.04155
0.156167	0.05	-0.0973		0.156	0.05	-0.04175
0.157	0.05	-0.0979		0.156833	0.05	-0.04195
0.157833	0.05	-0.0985		0.157667	0.05	-0.04215
0.158667	0.05	-0.09905		0.1585	0.05	-0.04235
0.1595	0.05	-0.0996		0.159333	0.05	-0.04265
0.160333	0.05	-0.1001		0.160167	0.05	-0.04295
0.161167	0.05	-0.10065		0.161	0.05	-0.04325
0.162	0.05	-0.10115		0.161833	0.05	-0.04355
0.162833	0.05	-0.10165		0.162667	0.05	-0.04385
0.163667	0.05	-0.1021		0.1635	0.05	-0.0442
0.1645	0.05	-0.1026		0.164333	0.05	-0.04455
0.165333	0.05	-0.10305		0.165167	0.05	-0.0449
0.166167	0.05	-0.1035		0.166	0.05	-0.04525
0.167	0.05	-0.104		0.166833	0.05	-0.04555
0.167833	0.05	-0.10455		0.167667	0.05	-0.0458
0.168667	0.05	-0.1051		0.1685	0.05	-0.04605
0.1695	0.05	-0.1057		0.169333	0.05	-0.0463
0.170333	0.05	-0.10625		0.170167	0.05	-0.0465
0.171167	0.05	-0.10685		0.171	0.05	-0.0467
0.172	0.05	-0.1074		0.171833	0.05	-0.0469
0.172833	0.05	-0.108		0.172667	0.05	-0.0471
0.173667	0.05	-0.10865		0.1735	0.05	-0.0473
0.1745	0.05	-0.10925		0.174333	0.05	-0.04745
0.175333	0.05	-0.10985		0.175167	0.05	-0.04765
0.176167	0.05	-0.1105		0.176	0.05	-0.0478
0.177	0.05	-0.1111		0.176833	0.05	-0.048
0.177833	0.05	-0.1117		0.177667	0.05	-0.04815
0.178667	0.05	-0.11235		0.1785	0.05	-0.04835
0.1795	0.05	-0.113		0.179333	0.05	-0.0485
0.180333	0.05	-0.1136		0.180167	0.05	-0.0487
0.181167	0.05	-0.1143		0.181	0.05	-0.04885
0.182	0.05	-0.1149		0.181833	0.05	-0.049
0.182833	0.05	-0.1156		0.182667	0.05	-0.04915
0.183667	0.05	-0.11615		0.1835	0.05	-0.04935
0.1845	0.05	-0.11665		0.184333	0.05	-0.0496
0.185333	0.05	-0.1171		0.185167	0.05	-0.0499
0.186167	0.05	-0.1175		0.186	0.05	-0.0502
0.187	0.05	-0.11795		0.186833	0.05	-0.0505
0.187833	0.05	-0.11835		0.187667	0.05	-0.0508
0.188667	0.05	-0.1187		0.1885	0.05	-0.05115
0.1895	0.05	-0.11905		0.189333	0.05	-0.0515
0.190333	0.05	-0.11935		0.190167	0.05	-0.05185
0.191167	0.05	-0.11965		0.191	0.05	-0.05225
0.192	0.05	-0.12015		0.191833	0.05	-0.05255
0.192833	0.05	-0.12075		0.192667	0.05	-0.05275
0.193667	0.05	-0.1214		0.1935	0.05	-0.0529
0.1945	0.05	-0.12205		0.194333	0.05	-0.05305
0.195333	0.05	-0.12275		0.195167	0.05	-0.05315
0.196167	0.05	-0.1235		0.196	0.05	-0.05325
0.197	0.05	-0.1243		0.196833	0.05	-0.05335
0.197833	0.05	-0.1251		0.197667	0.05	-0.0534
0.198667	0.05	-0.12595		0.1985	0.05	-0.05345
0.1995	0.05	-0.1268		0.199333	0.05	-0.0535
0.200333	0.05	-0.12745		0.200167	0.05	-0.0536
0.201167	0.05	-0.128		0.201	0.05	-0.0538
0.202	0.05	-0.1285		0.201833	0.05	-0.0541
0.202833	0.05	-0.12895		0.202667	0.05	-0.05435
0.203667	0.05	-0.12935		0.2035	0.05	-0.05465
0.2045	0.05	-0.12975		0.204333	0.05	-0.055
0.205333	0.05	-0.1301		0.205167	0.05	-0.0553
0.206167	0.05	-0.1304		0.206	0.05	-0.0557
0.207	0.05	-0.1307		0.206833	0.05	-0.05605
0.207833	0.05	-0.13095		0.207667	0.05	-0.05645
0.208667	0.05	-0.1314		0.2085	0.05	-0.0568
0.2095	0.05	-0.1319		0.209333	0.05	-0.05705
0.210333	0.05	-0.1324		0.210167	0.05	-0.05725
0.211167	0.05	-0.13295		0.211	0.05	-0.05745
0.212	0.05	-0.1335		0.211833	0.05	-0.05765
0.212833	0.05	-0.1341		0.212667	0.05	-0.0578
0.213667	0.05	-0.1347		0.2135	0.05	-0.05795
0.2145	0.05	-0.13535		0.214333	0.05	-0.0581
0.215333	0.05	-0.13595		0.215167	0.05	-0.05825
0.216167	0.05	-0.13665		0.216	0.05	-0.05835
0.217	0.05	-0.13715		0.216833	0.05	-0.0585
0.217833	0.05	-0.13755		0.217667	0.05	-0.0587
0.218667	0.05	-0.13795		0.2185	0.05	-0.05895
0.2195	0.05	-0.13835		0.219333	0.05	-0.0592
0.220333	0.05	-0.1387		0.220167	0.05	-0.05945
0.221167	0.05	-0.139		0.221	0.05	-0.0597
0.222	0.05	-0.1393		0.221833	0.05	-0.05995
0.222833	0.05	-0.13955		0.222667	0.05	-0.06025
0.223667	0.05	-0.1398		0.2235	0.05	-0.06055
0.2245	0.05	-0.14		0.224333	0.05	-0.06085
0.225333	0.05	-0.1404		0.225167	0.05	-0.0611
0.226167	0.05	-0.1409		0.226	0.05	-0.06125
0.227	0.05	-0.14135		0.226833	0.05	-0.06145
0.227833	0.05	-0.1419		0.227667	0.05	-0.0616
0.228667	0.05	-0.1424		0.2285	0.05	-0.06175
0.2295	0.05	-0.14295		0.229333	0.05	-0.0619
0.230333	0.05	-0.14355		0.230167	0.05	-0.062
0.231167	0.05	-0.14415		0.231	0.05	-0.0621
0.232	0.05	-0.1448		0.231833	0.05	-0.0622
0.232833	0.05	-0.14545		0.232667	0.05	-0.0623
0.233667	0.05	-0.1459		0.2335	0.05	-0.0624
0.2345	0.05	-0.1463		0.234333	0.05	-0.0626
0.235333	0.05	-0.14665		0.235167	0.05	-0.0628
0.236167	0.05	-0.147		0.236	0.05	-0.063
0.237	0.05	-0.1473		0.236833	0.05	-0.0632
0.237833	0.05	-0.1476		0.237667	0.05	-0.0634
0.238667	0.05	-0.14785		0.2385	0.05	-0.0636
0.2395	0.05	-0.14805		0.239333	0.05	-0.06385
0.240333	0.05	-0.14825		0.240167	0.05	-0.06405
0.241167	0.05	-0.14845		0.241	0.05	-0.0643
0.242	0.05	-0.1488		0.241833	0.05	-0.0645
0.242833	0.05	-0.1493		0.242667	0.05	-0.0646
0.243667	0.05	-0.1498		0.2435	0.05	-0.0647
0.2445	0.05	-0.15035		0.244333	0.05	-0.06475
0.245333	0.05	-0.15095		0.245167	0.05	-0.0648
0.246167	0.05	-0.15155		0.246	0.05	-0.06485
0.247	0.05	-0.1522		0.246833	0.05	-0.0649
0.247833	0.05	-0.1529		0.247667	0.05	-0.0649
0.248667	0.05	-0.1536		0.2485	0.05	-0.0649
0.2495	0.05	-0.15435		0.249333	0.05	-0.06485
0.250333	0.05	-0.1549		0.250167	0.05	-0.0649
0.251167	0.05	-0.15535		0.251	0.05	-0.065
0.252	0.05	-0.1558		0.251833	0.05	-0.06515
0.252833	0.05	-0.1562		0.252667	0.05	-0.0653
0.253667	0.05	-0.15655		0.2535	0.05	-0.0655
0.2545	0.05	-0.1569		0.254333	0.05	-0.06565
0.255333	0.05	-0.1572		0.255167	0.05	-0.06585
0.256167	0.05	-0.1575		0.256	0.05	-0.0661
0.257	0.05	-0.15775		0.256833	0.05	-0.0663
0.257833	0.05	-0.158		0.257667	0.05	-0.06655
0.258667	0.05	-0.15835		0.2585	0.05	-0.0668
0.2595	0.05	-0.1587		0.259333	0.05	-0.06705
0.260333	0.05	-0.1591		0.260167	0.05	-0.06725
0.261167	0.05	-0.1595		0.261	0.05	-0.0675
0.262	0.05	-0.15985		0.261833	0.05	-0.0678
0.262833	0.05	-0.16025		0.262667	0.05	-0.06805
0.263667	0.05	-0.16065		0.2635	0.05	-0.06835
0.2645	0.05	-0.16105		0.264333	0.05	-0.0686
0.265333	0.05	-0.16145		0.265167	0.05	-0.0689
0.266167	0.05	-0.16185		0.266	0.05	-0.06925
0.267	0.05	-0.16235		0.266833	0.05	-0.0695
0.267833	0.05	-0.16285		0.267667	0.05	-0.0697
0.268667	0.05	-0.1634		0.2685	0.05	-0.0699
0.2695	0.05	-0.16395		0.269333	0.05	-0.07005
0.270333	0.05	-0.1645		0.270167	0.05	-0.07025
0.271167	0.05	-0.1651		0.271	0.05	-0.0704
0.272	0.05	-0.1657		0.271833	0.05	-0.07055
0.272833	0.05	-0.16635		0.272667	0.05	-0.0707
0.273667	0.05	-0.167		0.2735	0.05	-0.0708
0.2745	0.05	-0.1677		0.274333	0.05	-0.07095
0.275333	0.05	-0.16825		0.275167	0.05	-0.07105
0.276167	0.05	-0.1687		0.276	0.05	-0.0712
0.277	0.05	-0.16915		0.276833	0.05	-0.07135
0.277833	0.05	-0.16955		0.277667	0.05	-0.07145
0.278667	0.05	-0.17		0.2785	0.05	-0.0716
0.2795	0.05	-0.1704		0.279333	0.05	-0.0717
0.280333	0.05	-0.17075		0.280167	0.05	-0.07185
0.281167	0.05	-0.1711		0.281	0.05	-0.07195
0.282	0.05	-0.17145		0.281833	0.05	-0.07205
0.282833	0.05	-0.17175		0.282667	0.05	-0.0722
0.283667	0.05	-0.1721		0.2835	0.05	-0.0723
0.2845	0.05	-0.1725		0.284333	0.05	-0.0725
0.285333	0.05	-0.1729		0.285167	0.05	-0.0727
0.286167	0.05	-0.17325		0.286	0.05	-0.0729
0.287	0.05	-0.17365		0.286833	0.05	-0.0731
0.287833	0.05	-0.174		0.287667	0.05	-0.07335
0.288667	0.05	-0.1744		0.2885	0.05	-0.07355
0.2895	0.05	-0.1748		0.289333	0.05	-0.0738
0.290333	0.05	-0.17515		0.290167	0.05	-0.07405
0.291167	0.05	-0.17555		0.291	0.05	-0.07435
0.292	0.05	-0.1759		0.291833	0.05	-0.07455
0.292833	0.05	-0.1763		0.292667	0.05	-0.07475
0.293667	0.05	-0.17665		0.2935	0.05	-0.07485
0.2945	0.05	-0.17705		0.294333	0.05	-0.07505
0.295333	0.05	-0.1774		0.295167	0.05	-0.07515
0.296167	0.05	-0.1778		0.296	0.05	-0.07525
0.297	0.05	-0.1782		0.296833	0.05	-0.0754
0.297833	0.05	-0.17855		0.297667	0.05	-0.0755
0.298667	0.05	-0.17895		0.2985	0.05	-0.07555
0.2995	0.05	-0.1793		0.299333	0.05	-0.07565
0.300333	0.05	-0.1797		0.300167	0.05	-0.0757
0.301167	0.05	-0.18005		0.301	0.05	-0.07575
0.302	0.05	-0.1804		0.301833	0.05	-0.0758
0.302833	0.05	-0.1808		0.302667	0.05	-0.07585
0.303667	0.05	-0.18115		0.3035	0.05	-0.07585
0.3045	0.05	-0.1815		0.304333	0.05	-0.0759
0.305333	0.05	-0.18185		0.305167	0.05	-0.0759
0.306167	0.05	-0.1822		0.306	0.05	-0.07585
0.307	0.05	-0.18255		0.306833	0.05	-0.07585
0.307833	0.05	-0.1829		0.307667	0.05	-0.0758
0.308667	0.05	-0.18325		0.3085	0.05	-0.07585
0.3095	0.05	-0.18365		0.309333	0.05	-0.07595
0.310333	0.05	-0.18405		0.310167	0.05	-0.0761
0.311167	0.05	-0.1844		0.311	0.05	-0.07625
0.312	0.05	-0.1848		0.311833	0.05	-0.0764
0.312833	0.05	-0.1852		0.312667	0.05	-0.0766
0.313667	0.05	-0.18565		0.3135	0.05	-0.0768
0.3145	0.05	-0.18605		0.314333	0.05	-0.07705
0.315333	0.05	-0.18645		0.315167	0.05	-0.0773
0.316167	0.05	-0.1869		0.316	0.05	-0.07755
0.317	0.05	-0.18735		0.316833	0.05	-0.0778
0.317833	0.05	-0.18785		0.317667	0.05	-0.078
0.318667	0.05	-0.18835		0.3185	0.05	-0.07825
0.3195	0.05	-0.18885		0.319333	0.05	-0.0785
0.320333	0.05	-0.18935		0.320167	0.05	-0.07875
0.321167	0.05	-0.18985		0.321	0.05	-0.079
0.322	0.05	-0.1904		0.321833	0.05	-0.07925
0.322833	0.05	-0.19095		0.322667	0.05	-0.0795
0.323667	0.05	-0.1915		0.3235	0.05	-0.07975
0.3245	0.05	-0.19205		0.324333	0.05	-0.08005
0.325333	0.05	-0.1926		0.325167	0.05	-0.0802
0.326167	0.05	-0.1931		0.326	0.05	-0.0803
0.327	0.05	-0.1936		0.326833	0.05	-0.08035
0.327833	0.05	-0.1941		0.327667	0.05	-0.08035
0.328667	0.05	-0.1946		0.3285	0.05	-0.0803
0.3295	0.05	-0.1951		0.329333	0.05	-0.08025
0.330333	0.05	-0.1956		0.330167	0.05	-0.08015
0.331167	0.05	-0.1961		0.331	0.05	-0.08005
0.332	0.05	-0.19655		0.331833	0.05	-0.07985
0.332833	0.05	-0.19705		0.332667	0.05	-0.0797
0.333667	0.05	-0.1975		0.3335	0.05	-0.07965
0.3345	0.05	-0.198		0.334333	0.05	-0.0798
0.335333	0.05	-0.19845		0.335167	0.05	-0.08
0.336167	0.05	-0.1989		0.336	0.05	-0.0802
0.337	0.05	-0.19935		0.336833	0.05	-0.08045
0.337833	0.05	-0.1998		0.337667	0.05	-0.08075
0.338667	0.05	-0.20025		0.3385	0.05	-0.0811
0.3395	0.05	-0.2007		0.339333	0.05	-0.08145
0.340333	0.05	-0.2011		0.340167	0.05	-0.08185
0.341167	0.05	-0.20155		0.341	0.05	-0.0823
0.342	0.05	-0.202		0.341833	0.05	-0.08265
0.342833	0.05	-0.2024		0.342667	0.05	-0.0828
0.343667	0.05	-0.20285		0.3435	0.05	-0.08295
0.3445	0.05	-0.2033		0.344333	0.05	-0.0831
0.345333	0.05	-0.2037		0.345167	0.05	-0.08325
0.346167	0.05	-0.20415		0.346	0.05	-0.08335
0.347	0.05	-0.20455		0.346833	0.05	-0.0834
0.347833	0.05	-0.20495		0.347667	0.05	-0.0835
0.348667	0.05	-0.2054		0.3485	0.05	-0.08355
0.3495	0.05	-0.2058		0.349333	0.05	-0.0836
0.350333	0.05	-0.2062		0.350167	0.05	-0.08365
0.351167	0.05	-0.2066		0.351	0.05	-0.08375
0.352	0.05	-0.20695		0.351833	0.05	-0.0839
0.352833	0.05	-0.20735		0.352667	0.05	-0.08405
0.353667	0.05	-0.2077		0.3535	0.05	-0.08415
0.3545	0.05	-0.20805		0.354333	0.05	-0.0843
0.355333	0.05	-0.2084		0.355167	0.05	-0.0844
0.356167	0.05	-0.20875		0.356	0.05	-0.08455
0.357	0.05	-0.20905		0.356833	0.05	-0.0847
0.357833	0.05	-0.2094		0.357667	0.05	-0.08485
0.358667	0.05	-0.2097		0.3585	0.05	-0.085
0.3595	0.05	-0.21		0.359333	0.05	-0.0851
0.360333	0.05	-0.21025		0.360167	0.05	-0.0852
0.361167	0.05	-0.21055		0.361	0.05	-0.0853
0.362	0.05	-0.2108		0.361833	0.05	-0.08535
0.362833	0.05	-0.21105		0.362667	0.05	-0.08545
0.363667	0.05	-0.2113		0.3635	0.05	-0.08555
0.3645	0.05	-0.21155		0.364333	0.05	-0.0856
0.365333	0.05	-0.2118		0.365167	0.05	-0.0857
0.366167	0.05	-0.212		0.366	0.05	-0.08575
0.367	0.05	-0.2124		0.366833	0.05	-0.0859
0.367833	0.05	-0.21285		0.367667	0.05	-0.08615
0.368667	0.05	-0.2133		0.3685	0.05	-0.0864
0.3695	0.05	-0.21385		0.369333	0.05	-0.0867
0.370333	0.05	-0.21435		0.370167	0.05	-0.08705
0.371167	0.05	-0.2149		0.371	0.05	-0.0874
0.372	0.05	-0.21555		0.371833	0.05	-0.0878
0.372833	0.05	-0.21615		0.372667	0.05	-0.0882
0.373667	0.05	-0.21685		0.3735	0.05	-0.0886
0.3745	0.05	-0.2175		0.374333	0.05	-0.0891
0.375333	0.05	-0.2181		0.375167	0.05	-0.08945
0.376167	0.05	-0.21855		0.376	0.05	-0.0897
0.377	0.05	-0.219		0.376833	0.05	-0.0899
0.377833	0.05	-0.2195		0.377667	0.05	-0.0901
0.378667	0.05	-0.2199		0.3785	0.05	-0.0903
0.3795	0.05	-0.22035		0.379333	0.05	-0.0905
0.380333	0.05	-0.22075		0.380167	0.05	-0.0906
0.381167	0.05	-0.22115		0.381	0.05	-0.09075
0.382	0.05	-0.22155		0.381833	0.05	-0.09085
0.382833	0.05	-0.22195		0.382667	0.05	-0.09095
0.383667	0.05	-0.2224		0.3835	0.05	-0.09105
0.3845	0.05	-0.2229		0.384333	0.05	-0.0912
0.385333	0.05	-0.2234		0.385167	0.05	-0.0913
0.386167	0.05	-0.2239		0.386	0.05	-0.09145
0.387	0.05	-0.2244		0.386833	0.05	-0.09155
0.387833	0.05	-0.22495		0.387667	0.05	-0.0917
0.388667	0.05	-0.22545		0.3885	0.05	-0.0918
0.3895	0.05	-0.22605		0.389333	0.05	-0.0919
0.390333	0.05	-0.2266		0.390167	0.05	-0.092
0.391167	0.05	-0.22715		0.391	0.05	-0.0921
0.392	0.05	-0.2277		0.391833	0.05	-0.0922
0.392833	0.05	-0.2282		0.392667	0.05	-0.0924
0.393667	0.05	-0.22865		0.3935	0.05	-0.09265
0.3945	0.05	-0.22915		0.394333	0.05	-0.09285
0.395333	0.05	-0.2296		0.395167	0.05	-0.0931
0.396167	0.05	-0.2301		0.396	0.05	-0.09335
0.397	0.05	-0.23055		0.396833	0.05	-0.0936
0.397833	0.05	-0.231		0.397667	0.05	-0.0939
0.398667	0.05	-0.23145		0.3985	0.05	-0.09415
0.3995	0.05	-0.2319		0.399333	0.05	-0.09445
0.400333	0.05	-0.2324		0.400167	0.05	-0.0947
0.401167	0.05	-0.2329		0.401	0.05	-0.0949
0.402	0.05	-0.23345		0.401833	0.05	-0.09505
0.402833	0.05	-0.23395		0.402667	0.05	-0.0952
0.403667	0.05	-0.2345		0.4035	0.05	-0.0953
0.4045	0.05	-0.23505		0.404333	0.05	-0.0954
0.405333	0.05	-0.23555		0.405167	0.05	-0.0955
0.406167	0.05	-0.23615		0.406	0.05	-0.0956
0.407	0.05	-0.2367		0.406833	0.05	-0.09565
0.407833	0.05	-0.23725		0.407667	0.05	-0.0957
0.408667	0.05	-0.2377		0.4085	0.05	-0.0958
0.4095	0.05	-0.2381		0.409333	0.05	-0.0959
0.410333	0.05	-0.23845		0.410167	0.05	-0.096
0.411167	0.05	-0.2388		0.411	0.05	-0.0961
0.412	0.05	-0.2391		0.411833	0.05	-0.09625
0.412833	0.05	-0.2394		0.412667	0.05	-0.09635
0.413667	0.05	-0.23965		0.4135	0.05	-0.09645
0.4145	0.05	-0.2399		0.414333	0.05	-0.09655
0.415333	0.05	-0.24015		0.415167	0.05	-0.09665
0.416167	0.05	-0.24035		0.416	0.05	-0.0968
0.417	0.05	-0.2406		0.416833	0.05	-0.0969
0.417833	0.05	-0.2409		0.417667	0.05	-0.09705
0.418667	0.05	-0.2412		0.4185	0.05	-0.09725
0.4195	0.05	-0.2415		0.419333	0.05	-0.0974
0.420333	0.05	-0.2418		0.420167	0.05	-0.0976
0.421167	0.05	-0.2421		0.421	0.05	-0.0978
0.422	0.05	-0.2424		0.421833	0.05	-0.09795
0.422833	0.05	-0.2427		0.422667	0.05	-0.0982
0.423667	0.05	-0.243		0.4235	0.05	-0.0984
0.4245	0.05	-0.2433		0.424333	0.05	-0.0986
0.425333	0.05	-0.24375		0.425167	0.05	-0.09875
0.426167	0.05	-0.24425		0.426	0.05	-0.09885
0.427	0.05	-0.24475		0.426833	0.05	-0.09885
0.427833	0.05	-0.2453		0.427667	0.05	-0.0989
0.428667	0.05	-0.24595		0.4285	0.05	-0.09885
0.4295	0.05	-0.24655		0.429333	0.05	-0.0988
0.430333	0.05	-0.24725		0.430167	0.05	-0.09875
0.431167	0.05	-0.24795		0.431	0.05	-0.09865
0.432	0.05	-0.24865		0.431833	0.05	-0.0986
0.432833	0.05	-0.24945		0.432667	0.05	-0.09845
0.433667	0.05	-0.25		0.4335	0.05	-0.09845
0.4345	0.05	-0.25045		0.434333	0.05	-0.09855
0.435333	0.05	-0.25085		0.435167	0.05	-0.09865
0.436167	0.05	-0.25125		0.436	0.05	-0.09885
0.437	0.05	-0.2516		0.436833	0.05	-0.099
0.437833	0.05	-0.2519		0.437667	0.05	-0.09925
0.438667	0.05	-0.2522		0.4385	0.05	-0.09945
0.4395	0.05	-0.25245		0.439333	0.05	-0.0997
0.440333	0.05	-0.2527		0.440167	0.05	-0.1
0.441167	0.05	-0.2529		0.441	0.05	-0.1003
0.442	0.05	-0.25315		0.441833	0.05	-0.10055
0.442833	0.05	-0.2535		0.442667	0.05	-0.10065
0.443667	0.05	-0.25385		0.4435	0.05	-0.10075
0.4445	0.05	-0.25415		0.444333	0.05	-0.10085
0.445333	0.05	-0.2545		0.445167	0.05	-0.10095
0.446167	0.05	-0.25485		0.446	0.05	-0.101
0.447	0.05	-0.2552		0.446833	0.05	-0.10105
0.447833	0.05	-0.25555		0.447667	0.05	-0.1011
0.448667	0.05	-0.2559		0.4485	0.05	-0.1011
0.4495	0.05	-0.25625		0.449333	0.05	-0.1011
0.450333	0.05	-0.25665		0.450167	0.05	-0.10115
0.451167	0.05	-0.2571		0.451	0.05	-0.1014
0.452	0.05	-0.25755		0.451833	0.05	-0.1016
0.452833	0.05	-0.258		0.452667	0.05	-0.10185
0.453667	0.05	-0.2585		0.4535	0.05	-0.10215
0.4545	0.05	-0.259		0.454333	0.05	-0.10245
0.455333	0.05	-0.25955		0.455167	0.05	-0.10275
0.456167	0.05	-0.2601		0.456	0.05	-0.1031
0.457	0.05	-0.26065		0.456833	0.05	-0.1035
0.457833	0.05	-0.2612		0.457667	0.05	-0.10385
0.458667	0.05	-0.26165		0.4585	0.05	-0.1042
0.4595	0.05	-0.26205		0.459333	0.05	-0.1044
0.460333	0.05	-0.26245		0.460167	0.05	-0.10455
0.461167	0.05	-0.2628		0.461	0.05	-0.1047
0.462	0.05	-0.26315		0.461833	0.05	-0.10485
0.462833	0.05	-0.2635		0.462667	0.05	-0.105
0.463667	0.05	-0.2638		0.4635	0.05	-0.1051
0.4645	0.05	-0.2641		0.464333	0.05	-0.1052
0.465333	0.05	-0.2644		0.465167	0.05	-0.10525
0.466167	0.05	-0.26465		0.466	0.05	-0.1053
0.467	0.05	-0.26495		0.466833	0.05	-0.10535
0.467833	0.05	-0.2653		0.467667	0.05	-0.10545
0.468667	0.05	-0.2656		0.4685	0.05	-0.10555
0.4695	0.05	-0.26595		0.469333	0.05	-0.1056
0.470333	0.05	-0.26625		0.470167	0.05	-0.1057
0.471167	0.05	-0.2666		0.471	0.05	-0.10575
0.472	0.05	-0.2669		0.471833	0.05	-0.1058
0.472833	0.05	-0.26725		0.472667	0.05	-0.10585
0.473667	0.05	-0.26755		0.4735	0.05	-0.1059
0.4745	0.05	-0.2679		0.474333	0.05	-0.10595
0.475333	0.05	-0.26825		0.475167	0.05	-0.106
0.476167	0.05	-0.26865		0.476	0.05	-0.1061
0.477	0.05	-0.269		0.476833	0.05	-0.10625
0.477833	0.05	-0.2694		0.477667	0.05	-0.1064
0.478667	0.05	-0.26985		0.4785	0.05	-0.10655
0.4795	0.05	-0.27025		0.479333	0.05	-0.1067
0.480333	0.05	-0.2707		0.480167	0.05	-0.10685
0.481167	0.05	-0.27115		0.481	0.05	-0.10705
0.482	0.05	-0.2716		0.481833	0.05	-0.10725
0.482833	0.05	-0.27205		0.482667	0.05	-0.10745
0.483667	0.05	-0.27245		0.4835	0.05	-0.10755
0.4845	0.05	-0.2728		0.484333	0.05	-0.10765
0.485333	0.05	-0.27315		0.485167	0.05	-0.1077
0.486167	0.05	-0.27345		0.486	0.05	-0.10775
0.487	0.05	-0.2738		0.486833	0.05	-0.10775
0.487833	0.05	-0.2741		0.487667	0.05	-0.1078
0.488667	0.05	-0.2744		0.4885	0.05	-0.1078
0.4895	0.05	-0.2747		0.489333	0.05	-0.10775
0.490333	0.05	-0.275		0.490167	0.05	-0.1077
0.491167	0.05	-0.27525		0.491	0.05	-0.10765
0.492	0.05	-0.27555		0.491833	0.05	-0.1077
0.492833	0.05	-0.27585		0.492667	0.05	-0.10785
0.493667	0.05	-0.2762		0.4935	0.05	-0.10805
0.4945	0.05	-0.2765		0.494333	0.05	-0.1083
0.495333	0.05	-0.2768		0.495167	0.05	-0.1085
0.496167	0.05	-0.27715		0.496	0.05	-0.1088
0.497	0.05	-0.27745		0.496833	0.05	-0.1091
0.497833	0.05	-0.27775		0.497667	0.05	-0.1094
0.498667	0.05	-0.27805		0.4985	0.05	-0.10975
0.4995	0.05	-0.2784		0.499333	0.05	-0.11015
0.500333	0.05	-0.2787		0.500167	0.05	-0.1104
0.501167	0.05	-0.279		0.501	0.05	-0.11055
0.502	0.05	-0.27925		0.501833	0.05	-0.1107
0.502833	0.05	-0.27955		0.502667	0.05	-0.1108
0.503667	0.05	-0.27985		0.5035	0.05	-0.11085
0.5045	0.05	-0.2801		0.504333	0.05	-0.11095
0.505333	0.05	-0.2804		0.505167	0.05	-0.111
0.506167	0.05	-0.28065		0.506	0.05	-0.111
0.507	0.05	-0.28095		0.506833	0.05	-0.11105
0.507833	0.05	-0.2812		0.507667	0.05	-0.111
0.508667	0.05	-0.2816		0.5085	0.05	-0.111
0.5095	0.05	-0.28205		0.509333	0.05	-0.1111
0.510333	0.05	-0.2825		0.510167	0.05	-0.1112
0.511167	0.05	-0.283		0.511	0.05	-0.1113
0.512	0.05	-0.2835		0.511833	0.05	-0.11135
0.512833	0.05	-0.28405		0.512667	0.05	-0.11145
0.513667	0.05	-0.28465		0.5135	0.05	-0.11155
0.5145	0.05	-0.28525		0.514333	0.05	-0.11165
0.515333	0.05	-0.28585		0.515167	0.05	-0.11175
0.516167	0.05	-0.28655		0.516	0.05	-0.1119
0.517	0.05	-0.287		0.516833	0.05	-0.112
0.517833	0.05	-0.2874		0.517667	0.05	-0.11215
0.518667	0.05	-0.2878		0.5185	0.05	-0.11225
0.5195	0.05	-0.28815		0.519333	0.05	-0.1124
0.520333	0.05	-0.28845		0.520167	0.05	-0.11255
0.521167	0.05	-0.28875		0.521	0.05	-0.1127
0.522	0.05	-0.289		0.521833	0.05	-0.11285
0.522833	0.05	-0.28925		0.522667	0.05	-0.11305
0.523667	0.05	-0.2895		0.5235	0.05	-0.1132
0.5245	0.05	-0.2897		0.524333	0.05	-0.1134
0.525333	0.05	-0.28995		0.525167	0.05	-0.11355
0.526167	0.05	-0.29025		0.526	0.05	-0.1137
0.527	0.05	-0.2906		0.526833	0.05	-0.11385
0.527833	0.05	-0.2909		0.527667	0.05	-0.114
0.528667	0.05	-0.29125		0.5285	0.05	-0.11415
0.5295	0.05	-0.29155		0.529333	0.05	-0.11425
0.530333	0.05	-0.2919		0.530167	0.05	-0.1144
0.531167	0.05	-0.2922		0.531	0.05	-0.11455
0.532	0.05	-0.29255		0.531833	0.05	-0.1147
0.532833	0.05	-0.2929		0.532667	0.05	-0.1148
0.533667	0.05	-0.29325		0.5335	0.05	-0.11495
0.5345	0.05	-0.29365		0.534333	0.05	-0.11515
0.535333	0.05	-0.2941		0.535167	0.05	-0.11535
0.536167	0.05	-0.29455		0.536	0.05	-0.11555
0.537	0.05	-0.295		0.536833	0.05	-0.11575
0.537833	0.05	-0.2955		0.537667	0.05	-0.11595
0.538667	0.05	-0.296		0.5385	0.05	-0.11615
0.5395	0.05	-0.2965		0.539333	0.05	-0.1164
0.540333	0.05	-0.297		0.540167	0.05	-0.1166
0.541167	0.05	-0.29755		0.541	0.05	-0.11685
0.542	0.05	-0.29795		0.541833	0.05	-0.11705
0.542833	0.05	-0.29835		0.542667	0.05	-0.11715
0.543667	0.05	-0.2987		0.5435	0.05	-0.11725
0.5445	0.05	-0.29905		0.544333	0.05	-0.11735
0.545333	0.05	-0.2994		0.545167	0.05	-0.1174
0.546167	0.05	-0.29975		0.546	0.05	-0.1175
0.547	0.05	-0.30005		0.546833	0.05	-0.1175
0.547833	0.05	-0.30035		0.547667	0.05	-0.11755
0.548667	0.05	-0.30065		0.5485	0.05	-0.11755
0.5495	0.05	-0.3009		0.549333	0.05	-0.11755
0.550333	0.05	-0.3012		0.550167	0.05	-0.1176
0.551167	0.05	-0.30155		0.551	0.05	-0.1177
0.552	0.05	-0.30185		0.551833	0.05	-0.1178
0.552833	0.05	-0.30215		0.552667	0.05	-0.1179
0.553667	0.05	-0.3025		0.5535	0.05	-0.11805
0.5545	0.05	-0.3028		0.554333	0.05	-0.11815
0.555333	0.05	-0.3031		0.555167	0.05	-0.1183
0.556167	0.05	-0.3034		0.556	0.05	-0.11845
0.557	0.05	-0.30375		0.556833	0.05	-0.1186
0.557833	0.05	-0.30405		0.557667	0.05	-0.11875
0.558667	0.05	-0.30435		0.5585	0.05	-0.1189
0.5595	0.05	-0.30475		0.559333	0.05	-0.11905
0.560333	0.05	-0.30505		0.560167	0.05	-0.11915
0.561167	0.05	-0.30545		0.561	0.05	-0.1193
0.562	0.05	-0.3058		0.561833	0.05	-0.11945
0.562833	0.05	-0.3062		0.562667	0.05	-0.11955
0.563667	0.05	-0.30655		0.5635	0.05	-0.1197
0.5645	0.05	-0.30695		0.564333	0.05	-0.11985
0.565333	0.05	-0.3073		0.565167	0.05	-0.12
0.566167	0.05	-0.3077		0.566	0.05	-0.1201
0.567	0.05	-0.3081		0.566833	0.05	-0.12025
0.567833	0.05	-0.30855		0.567667	0.05	-0.12035
0.568667	0.05	-0.309		0.5685	0.05	-0.12045
0.5695	0.05	-0.30945		0.569333	0.05	-0.12055
0.570333	0.05	-0.3099		0.570167	0.05	-0.12065
0.571167	0.05	-0.31035		0.571	0.05	-0.12075
0.572	0.05	-0.3108		0.571833	0.05	-0.1208
0.572833	0.05	-0.3113		0.572667	0.05	-0.1209
0.573667	0.05	-0.3118		0.5735	0.05	-0.12095
0.5745	0.05	-0.3123		0.574333	0.05	-0.12105
0.575333	0.05	-0.3127		0.575167	0.05	-0.1212
0.576167	0.05	-0.3131		0.576	0.05	-0.1215
0.577	0.05	-0.31345		0.576833	0.05	-0.1218
0.577833	0.05	-0.3138		0.577667	0.05	-0.12215
0.578667	0.05	-0.31415		0.5785	0.05	-0.12255
0.5795	0.05	-0.31445		0.579333	0.05	-0.12295
0.580333	0.05	-0.3148		0.580167	0.05	-0.1234
0.581167	0.05	-0.3151		0.581	0.05	-0.12385
0.582	0.05	-0.31535		0.581833	0.05	-0.12435
0.582833	0.05	-0.31565		0.582667	0.05	-0.1249
0.583667	0.05	-0.31605		0.5835	0.05	-0.12525
0.5845	0.05	-0.3165		0.584333	0.05	-0.12545
0.585333	0.05	-0.31695		0.585167	0.05	-0.1255
0.586167	0.05	-0.31745		0.586	0.05	-0.1256
0.587	0.05	-0.31795		0.586833	0.05	-0.1256
0.587833	0.05	-0.31845		0.587667	0.05	-0.1256
0.588667	0.05	-0.319		0.5885	0.05	-0.1255
0.5895	0.05	-0.31955		0.589333	0.05	-0.1254
0.590333	0.05	-0.3201		0.590167	0.05	-0.12525
0.591167	0.05	-0.3207		0.591	0.05	-0.12505
0.592	0.05	-0.32115		0.591833	0.05	-0.125
0.592833	0.05	-0.3215		0.592667	0.05	-0.12515
0.593667	0.05	-0.32185		0.5935	0.05	-0.12535
0.5945	0.05	-0.3222		0.594333	0.05	-0.12555
0.595333	0.05	-0.32245		0.595167	0.05	-0.12585
0.596167	0.05	-0.32275		0.596	0.05	-0.1261
0.597	0.05	-0.323		0.596833	0.05	-0.12645
0.597833	0.05	-0.3232		0.597667	0.05	-0.1268
0.598667	0.05	-0.3234		0.5985	0.05	-0.12715
0.5995	0.05	-0.3236		0.599333	0.05	-0.12755
0.600333	0.05	-0.3239		0.600167	0.05	-0.12785
0.601167	0.05	-0.32425		0.601	0.05	-0.128
0.602	0.05	-0.32465		0.601833	0.05	-0.1281
0.602833	0.05	-0.3251		0.602667	0.05	-0.1282
0.603667	0.05	-0.32555		0.6035	0.05	-0.12825
0.6045	0.05	-0.326		0.604333	0.05	-0.12835
0.605333	0.05	-0.32645		0.605167	0.05	-0.12835
0.606167	0.05	-0.32695		0.606	0.05	-0.12835
0.607	0.05	-0.32745		0.606833	0.05	-0.1283
0.607833	0.05	-0.328		0.607667	0.05	-0.12825
0.608667	0.05	-0.32835		0.6085	0.05	-0.12825
0.6095	0.05	-0.3286		0.609333	0.05	-0.1283
0.610333	0.05	-0.32885		0.610167	0.05	-0.12835
0.611167	0.05	-0.32905		0.611	0.05	-0.1284
0.612	0.05	-0.32925		0.611833	0.05	-0.12845
0.612833	0.05	-0.3294		0.612667	0.05	-0.1285
0.613667	0.05	-0.3295		0.6135	0.05	-0.1285
0.6145	0.05	-0.3296		0.614333	0.05	-0.12855
0.615333	0.05	-0.3297		0.615167	0.05	-0.1286
0.616167	0.05	-0.32975		0.616	0.05	-0.12865
0.617	0.05	-0.32995		0.616833	0.05	-0.12875
0.617833	0.05	-0.33025		0.617667	0.05	-0.12885
0.618667	0.05	-0.3306		0.6185	0.05	-0.129
0.6195	0.05	-0.331		0.619333	0.05	-0.1291
0.620333	0.05	-0.3314		0.620167	0.05	-0.12925
0.621167	0.05	-0.33185		0.621	0.05	-0.1294
0.622	0.05	-0.3323		0.621833	0.05	-0.1296
0.622833	0.05	-0.3328		0.622667	0.05	-0.12975
0.623667	0.05	-0.3333		0.6235	0.05	-0.12995
0.6245	0.05	-0.3338		0.624333	0.05	-0.13015
0.625333	0.05	-0.33425		0.625167	0.05	-0.1304
0.626167	0.05	-0.33465		0.626	0.05	-0.1306
0.627	0.05	-0.335		0.626833	0.05	-0.13085
0.627833	0.05	-0.3354		0.627667	0.05	-0.1311
0.628667	0.05	-0.33575		0.6285	0.05	-0.13135
0.6295	0.05	-0.3361		0.629333	0.05	-0.1316
0.630333	0.05	-0.33645		0.630167	0.05	-0.1319
0.631167	0.05	-0.3368		0.631	0.05	-0.13215
0.632	0.05	-0.3371		0.631833	0.05	-0.13245
0.632833	0.05	-0.33745		0.632667	0.05	-0.13275
0.633667	0.05	-0.3378		0.6335	0.05	-0.13305
0.6345	0.05	-0.33815		0.634333	0.05	-0.13325
0.635333	0.05	-0.3385		0.635167	0.05	-0.1335
0.636167	0.05	-0.3389		0.636	0.05	-0.1337
0.637	0.05	-0.33925		0.636833	0.05	-0.1339
0.637833	0.05	-0.33965		0.637667	0.05	-0.1341
0.638667	0.05	-0.34		0.6385	0.05	-0.1343
0.6395	0.05	-0.34035		0.639333	0.05	-0.13445
0.640333	0.05	-0.34075		0.640167	0.05	-0.13465
0.641167	0.05	-0.3411		0.641	0.05	-0.1348
0.642	0.05	-0.34145		0.641833	0.05	-0.1349
0.642833	0.05	-0.3418		0.642667	0.05	-0.135
0.643667	0.05	-0.34215		0.6435	0.05	-0.13505
0.6445	0.05	-0.3425		0.644333	0.05	-0.1351
0.645333	0.05	-0.3428		0.645167	0.05	-0.13515
0.646167	0.05	-0.34315		0.646	0.05	-0.13515
0.647	0.05	-0.34345		0.646833	0.05	-0.1351
0.647833	0.05	-0.34375		0.647667	0.05	-0.13505
0.648667	0.05	-0.3441		0.6485	0.05	-0.135
0.6495	0.05	-0.3444		0.649333	0.05	-0.1349
0.650333	0.05	-0.3447		0.650167	0.05	-0.1349
0.651167	0.05	-0.34505		0.651	0.05	-0.13495
0.652	0.05	-0.3454		0.651833	0.05	-0.13495
0.652833	0.05	-0.3457		0.652667	0.05	-0.13505
0.653667	0.05	-0.34605		0.6535	0.05	-0.1351
0.6545	0.05	-0.3464		0.654333	0.05	-0.13515
0.655333	0.05	-0.34675		0.655167	0.05	-0.1352
0.656167	0.05	-0.3471		0.656	0.05	-0.13525
0.657	0.05	-0.34745		0.656833	0.05	-0.13535
0.657833	0.05	-0.3478		0.657667	0.05	-0.13545
0.658667	0.05	-0.34805		0.6585	0.05	-0.13555
0.6595	0.05	-0.3483		0.659333	0.05	-0.1357
0.660333	0.05	-0.34855		0.660167	0.05	-0.1358
0.661167	0.05	-0.3488		0.661	0.05	-0.136
0.662	0.05	-0.34905		0.661833	0.05	-0.13615
0.662833	0.05	-0.34925		0.662667	0.05	-0.1363
0.663667	0.05	-0.34945		0.6635	0.05	-0.1365
0.6645	0.05	-0.3496		0.664333	0.05	-0.1367
0.665333	0.05	-0.3498		0.665167	0.05	-0.13695
0.666167	0.05	-0.34995		0.666	0.05	-0.13715
0.667	0.05	-0.3502		0.666833	0.05	-0.13735
0.667833	0.05	-0.3505		0.667667	0.05	-0.13745
0.668667	0.05	-0.3508		0.6685	0.05	-0.13755
0.6695	0.05	-0.35115		0.669333	0.05	-0.13765
0.670333	0.05	-0.3515		0.670167	0.05	-0.13775
0.671167	0.05	-0.3519		0.671	0.05	-0.1378
0.672	0.05	-0.35225		0.671833	0.05	-0.1379
0.672833	0.05	-0.35265		0.672667	0.05	-0.13795
0.673667	0.05	-0.35305		0.6735	0.05	-0.138
0.6745	0.05	-0.3535		0.674333	0.05	-0.13805
0.675333	0.05	-0.3539		0.675167	0.05	-0.13805
0.676167	0.05	-0.35425		0.676	0.05	-0.13815
0.677	0.05	-0.3546		0.676833	0.05	-0.13825
0.677833	0.05	-0.355		0.677667	0.05	-0.13835
0.678667	0.05	-0.35535		0.6785	0.05	-0.13845
0.6795	0.05	-0.3557		0.679333	0.05	-0.13855
0.680333	0.05	-0.3561		0.680167	0.05	-0.1386
0.681167	0.05	-0.35645		0.681	0.05	-0.1387
0.682	0.05	-0.3568		0.681833	0.05	-0.13885
0.682833	0.05	-0.3572		0.682667	0.05	-0.13895
0.683667	0.05	-0.35755		0.6835	0.05	-0.13905
0.6845	0.05	-0.35795		0.684333	0.05	-0.1392
0.685333	0.05	-0.3583		0.685167	0.05	-0.1394
0.686167	0.05	-0.3587		0.686	0.05	-0.13955
0.687	0.05	-0.35905		0.686833	0.05	-0.13975
0.687833	0.05	-0.35945		0.687667	0.05	-0.13995
0.688667	0.05	-0.35985		0.6885	0.05	-0.14015
0.6895	0.05	-0.36025		0.689333	0.05	-0.14035
0.690333	0.05	-0.3606		0.690167	0.05	-0.14055
0.691167	0.05	-0.361		0.691	0.05	-0.1408
0.692	0.05	-0.36135		0.691833	0.05	-0.14105
0.692833	0.05	-0.36165		0.692667	0.05	-0.14125
0.693667	0.05	-0.36195		0.6935	0.05	-0.1415
0.6945	0.05	-0.36225		0.694333	0.05	-0.14175
0.695333	0.05	-0.3625		0.695167	0.05	-0.142
0.696167	0.05	-0.36275		0.696	0.05	-0.14225
0.697	0.05	-0.363		0.696833	0.05	-0.1425
0.697833	0.05	-0.36325		0.697667	0.05	-0.14275
0.698667	0.05	-0.36345		0.6985	0.05	-0.143
0.6995	0.05	-0.36365		0.699333	0.05	-0.1433
0.700333	0.05	-0.3639		0.700167	0.05	-0.1435
0.701167	0.05	-0.3641		0.701	0.05	-0.1436
0.702	0.05	-0.36435		0.701833	0.05	-0.1437
0.702833	0.05	-0.3646		0.702667	0.05	-0.14375
0.703667	0.05	-0.3648		0.7035	0.05	-0.1438
0.7045	0.05	-0.365		0.704333	0.05	-0.14385
0.705333	0.05	-0.3652		0.705167	0.05	-0.14385
0.706167	0.05	-0.36545		0.706	0.05	-0.14385
0.707	0.05	-0.36565		0.706833	0.05	-0.1438
0.707833	0.05	-0.3658		0.707667	0.05	-0.1437
0.708667	0.05	-0.3661		0.7085	0.05	-0.1437
0.7095	0.05	-0.3665		0.709333	0.05	-0.14375
0.710333	0.05	-0.36685		0.710167	0.05	-0.1438
0.711167	0.05	-0.36725		0.711	0.05	-0.1439
0.712	0.05	-0.3677		0.711833	0.05	-0.14395
0.712833	0.05	-0.36815		0.712667	0.05	-0.14405
0.713667	0.05	-0.36865		0.7135	0.05	-0.1441
0.7145	0.05	-0.36915		0.714333	0.05	-0.1442
0.715333	0.05	-0.36965		0.715167	0.05	-0.1443
0.716167	0.05	-0.3702		0.716	0.05	-0.1444
0.717	0.05	-0.3706		0.716833	0.05	-0.1445
0.717833	0.05	-0.37095		0.717667	0.05	-0.1447
0.718667	0.05	-0.3713		0.7185	0.05	-0.1449
0.7195	0.05	-0.37155		0.719333	0.05	-0.1451
0.720333	0.05	-0.37185		0.720167	0.05	-0.1453
0.721167	0.05	-0.3721		0.721	0.05	-0.14555
0.722	0.05	-0.37235		0.721833	0.05	-0.1458
0.722833	0.05	-0.3726		0.722667	0.05	-0.14605
0.723667	0.05	-0.3728		0.7235	0.05	-0.14635
0.7245	0.05	-0.373		0.724333	0.05	-0.14665
0.725333	0.05	-0.3732		0.725167	0.05	-0.1469
0.726167	0.05	-0.3735		0.726	0.05	-0.1471
0.727	0.05	-0.37375		0.726833	0.05	-0.14725
0.727833	0.05	-0.374		0.727667	0.05	-0.1474
0.728667	0.05	-0.37425		0.7285	0.05	-0.1475
0.7295	0.05	-0.37455		0.729333	0.05	-0.1476
0.730333	0.05	-0.3748		0.730167	0.05	-0.1477
0.731167	0.05	-0.37505		0.731	0.05	-0.1478
0.732	0.05	-0.37535		0.731833	0.05	-0.1479
0.732833	0.05	-0.3756		0.732667	0.05	-0.14795
0.733667	0.05	-0.3759		0.7335	0.05	-0.148
0.7345	0.05	-0.37625		0.734333	0.05	-0.1481
0.735333	0.05	-0.37655		0.735167	0.05	-0.1482
0.736167	0.05	-0.3769		0.736	0.05	-0.1483
0.737	0.05	-0.37725		0.736833	0.05	-0.14835
0.737833	0.05	-0.37765		0.737667	0.05	-0.14845
0.738667	0.05	-0.378		0.7385	0.05	-0.1485
0.7395	0.05	-0.3784		0.739333	0.05	-0.1486
0.740333	0.05	-0.3788		0.740167	0.05	-0.14865
0.741167	0.05	-0.3792		0.741	0.05	-0.1487
0.742	0.05	-0.37955		0.741833	0.05	-0.14875
0.742833	0.05	-0.3799		0.742667	0.05	-0.1488
0.743667	0.05	-0.38025		0.7435	0.05	-0.1488
0.7445	0.05	-0.38055		0.744333	0.05	-0.14885
0.745333	0.05	-0.3809		0.745167	0.05	-0.14885
0.746167	0.05	-0.3812		0.746	0.05	-0.1489
0.747	0.05	-0.3815		0.746833	0.05	-0.1489
0.747833	0.05	-0.38185		0.747667	0.05	-0.1489
0.748667	0.05	-0.38215		0.7485	0.05	-0.14885
0.7495	0.05	-0.38245		0.749333	0.05	-0.14885
0.750333	0.05	-0.3828		0.750167	0.05	-0.1489
0.751167	0.05	-0.38315		0.751	0.05	-0.1491
0.752	0.05	-0.38355		0.751833	0.05	-0.1493
0.752833	0.05	-0.38395		0.752667	0.05	-0.14955
0.753667	0.05	-0.38435		0.7535	0.05	-0.1498
0.7545	0.05	-0.3848		0.754333	0.05	-0.1501
0.755333	0.05	-0.3852		0.755167	0.05	-0.15045
0.756167	0.05	-0.38565		0.756	0.05	-0.1508
0.757	0.05	-0.3861		0.756833	0.05	-0.15115
0.757833	0.05	-0.38655		0.757667	0.05	-0.15155
0.758667	0.05	-0.38695		0.7585	0.05	-0.1519
0.7595	0.05	-0.3873		0.759333	0.05	-0.1521
0.760333	0.05	-0.3876		0.760167	0.05	-0.1523
0.761167	0.05	-0.38795		0.761	0.05	-0.15245
0.762	0.05	-0.38825		0.761833	0.05	-0.1526
0.762833	0.05	-0.3886		0.762667	0.05	-0.15275
0.763667	0.05	-0.38885		0.7635	0.05	-0.1529
0.7645	0.05	-0.38915		0.764333	0.05	-0.153
0.765333	0.05	-0.38945		0.765167	0.05	-0.1531
0.766167	0.05	-0.3897		0.766	0.05	-0.1532
0.767	0.05	-0.39005		0.766833	0.05	-0.15335
0.767833	0.05	-0.3904		0.767667	0.05	-0.15355
0.768667	0.05	-0.39075		0.7685	0.05	-0.15375
0.7695	0.05	-0.39115		0.769333	0.05	-0.15395
0.770333	0.05	-0.3915		0.770167	0.05	-0.1542
0.771167	0.05	-0.3919		0.771	0.05	-0.15445
0.772	0.05	-0.3923		0.771833	0.05	-0.1547
0.772833	0.05	-0.3927		0.772667	0.05	-0.15495
0.773667	0.05	-0.3931		0.7735	0.05	-0.15525
0.7745	0.05	-0.39355		0.774333	0.05	-0.15555
0.775333	0.05	-0.3939		0.775167	0.05	-0.1558
0.776167	0.05	-0.39425		0.776	0.05	-0.15595
0.777	0.05	-0.39455		0.776833	0.05	-0.15615
0.777833	0.05	-0.39485		0.777667	0.05	-0.1563
0.778667	0.05	-0.3951		0.7785	0.05	-0.15645
0.7795	0.05	-0.3954		0.779333	0.05	-0.1566
0.780333	0.05	-0.39565		0.780167	0.05	-0.1567
0.781167	0.05	-0.3959		0.781	0.05	-0.15685
0.782	0.05	-0.39615		0.781833	0.05	-0.15695
0.782833	0.05	-0.39635		0.782667	0.05	-0.15705
0.783667	0.05	-0.39665		0.7835	0.05	-0.15715
0.7845	0.05	-0.39695		0.784333	0.05	-0.15725
0.785333	0.05	-0.39725		0.785167	0.05	-0.1574
0.786167	0.05	-0.3976		0.786	0.05	-0.1575
0.787	0.05	-0.3979		0.786833	0.05	-0.1576
0.787833	0.05	-0.39825		0.787667	0.05	-0.1577
0.788667	0.05	-0.3986		0.7885	0.05	-0.1578
0.7895	0.05	-0.39895		0.789333	0.05	-0.1579
0.790333	0.05	-0.39925		0.790167	0.05	-0.158
0.791167	0.05	-0.39965		0.791	0.05	-0.1581
0.792	0.05	-0.3999		0.791833	0.05	-0.15815
0.792833	0.05	-0.40015		0.792667	0.05	-0.15825
0.793667	0.05	-0.4004		0.7935	0.05	-0.1583
0.7945	0.05	-0.4006		0.794333	0.05	-0.1584
0.795333	0.05	-0.4008		0.795167	0.05	-0.15845
0.796167	0.05	-0.401		0.796	0.05	-0.1585
0.797	0.05	-0.4012		0.796833	0.05	-0.15855
0.797833	0.05	-0.40135		0.797667	0.05	-0.15865
0.798667	0.05	-0.4015		0.7985	0.05	-0.15865
0.7995	0.05	-0.40165		0.799333	0.05	-0.1587
0.800333	0.05	-0.4019		0.800167	0.05	-0.15875
0.801167	0.05	-0.40225		0.801	0.05	-0.15885
0.802	0.05	-0.40265		0.801833	0.05	-0.1589
0.802833	0.05	-0.403		0.802667	0.05	-0.15895
0.803667	0.05	-0.40345		0.8035	0.05	-0.15905
0.8045	0.05	-0.40385		0.804333	0.05	-0.1591
0.805333	0.05	-0.40435		0.805167	0.05	-0.15915
0.806167	0.05	-0.40485		0.806	0.05	-0.15925
0.807	0.05	-0.40535		0.806833	0.05	-0.1593
0.807833	0.05	-0.40585		0.807667	0.05	-0.1594
0.808667	0.05	-0.4063		0.8085	0.05	-0.1595
0.8095	0.05	-0.40665		0.809333	0.05	-0.1597
0.810333	0.05	-0.40695		0.810167	0.05	-0.1599
0.811167	0.05	-0.4073		0.811	0.05	-0.1601
0.812	0.05	-0.4076		0.811833	0.05	-0.1603
0.812833	0.05	-0.4079		0.812667	0.05	-0.16055
0.813667	0.05	-0.40815		0.8135	0.05	-0.1608
0.8145	0.05	-0.4084		0.814333	0.05	-0.1611
0.815333	0.05	-0.40865		0.815167	0.05	-0.1614
0.816167	0.05	-0.4089		0.816	0.05	-0.1617
0.817	0.05	-0.40915		0.816833	0.05	-0.16195
0.817833	0.05	-0.40945		0.817667	0.05	-0.1621
0.818667	0.05	-0.4097		0.8185	0.05	-0.1622
0.8195	0.05	-0.40995		0.819333	0.05	-0.1623
0.820333	0.05	-0.4102		0.820167	0.05	-0.1624
0.821167	0.05	-0.41045		0.821	0.05	-0.16245
0.822	0.05	-0.4107		0.821833	0.05	-0.1625
0.822833	0.05	-0.41095		0.822667	0.05	-0.16255
0.823667	0.05	-0.4112		0.8235	0.05	-0.16255
0.8245	0.05	-0.4114		0.824333	0.05	-0.16255
0.825333	0.05	-0.4117		0.825167	0.05	-0.16255
0.826167	0.05	-0.412		0.826	0.05	-0.16265
0.827	0.05	-0.4123		0.826833	0.05	-0.16275
0.827833	0.05	-0.4126		0.827667	0.05	-0.16285
0.828667	0.05	-0.4129		0.8285	0.05	-0.16295
0.8295	0.05	-0.41325		0.829333	0.05	-0.1631
0.830333	0.05	-0.4136		0.830167	0.05	-0.1632
0.831167	0.05	-0.4139		0.831	0.05	-0.1633
0.832	0.05	-0.41425		0.831833	0.05	-0.16345
0.832833	0.05	-0.41465		0.832667	0.05	-0.16355
0.833667	0.05	-0.41495		0.8335	0.05	-0.1637
0.8345	0.05	-0.41525		0.834333	0.05	-0.16385
0.835333	0.05	-0.4156		0.835167	0.05	-0.16405
0.836167	0.05	-0.4159		0.836	0.05	-0.1642
0.837	0.05	-0.4162		0.836833	0.05	-0.16435
0.837833	0.05	-0.41655		0.837667	0.05	-0.16455
0.838667	0.05	-0.41685		0.8385	0.05	-0.16475
0.8395	0.05	-0.41715		0.839333	0.05	-0.16495
0.840333	0.05	-0.4175		0.840167	0.05	-0.16515
0.841167	0.05	-0.4178		0.841	0.05	-0.16535
0.842	0.05	-0.418		0.841833	0.05	-0.1655
0.842833	0.05	-0.41815		0.842667	0.05	-0.1656
0.843667	0.05	-0.41825		0.8435	0.05	-0.16565
0.8445	0.05	-0.4183		0.844333	0.05	-0.16565
0.845333	0.05	-0.41835		0.845167	0.05	-0.16565
0.846167	0.05	-0.4184		0.846	0.05	-0.16565
0.847	0.05	-0.4184		0.846833	0.05	-0.1656
0.847833	0.05	-0.41835		0.847667	0.05	-0.16555
0.848667	0.05	-0.4183		0.8485	0.05	-0.16545
0.8495	0.05	-0.4182		0.849333	0.05	-0.1654
0.850333	0.05	-0.41835		0.850167	0.05	-0.1654
0.851167	0.05	-0.4186		0.851	0.05	-0.16555
0.852	0.05	-0.4189		0.851833	0.05	-0.1657
0.852833	0.05	-0.41925		0.852667	0.05	-0.1659
0.853667	0.05	-0.41965		0.8535	0.05	-0.1661
0.8545	0.05	-0.4201		0.854333	0.05	-0.16635
0.855333	0.05	-0.42055		0.855167	0.05	-0.1666
0.856167	0.05	-0.42105		0.856	0.05	-0.1669
0.857	0.05	-0.4216		0.856833	0.05	-0.1672
0.857833	0.05	-0.42215		0.857667	0.05	-0.16755
0.858667	0.05	-0.4226		0.8585	0.05	-0.1678
0.8595	0.05	-0.42295		0.859333	0.05	-0.1679
0.860333	0.05	-0.4233		0.860167	0.05	-0.168
0.861167	0.05	-0.42365		0.861	0.05	-0.16805
0.862	0.05	-0.424		0.861833	0.05	-0.1681
0.862833	0.05	-0.42435		0.862667	0.05	-0.16815
0.863667	0.05	-0.42465		0.8635	0.05	-0.1682
0.8645	0.05	-0.425		0.864333	0.05	-0.16815
0.865333	0.05	-0.4253		0.865167	0.05	-0.1681
0.866167	0.05	-0.4256		0.866	0.05	-0.16805
0.867	0.05	-0.4259		0.866833	0.05	-0.16805
0.867833	0.05	-0.4262		0.867667	0.05	-0.16815
0.868667	0.05	-0.4265		0.8685	0.05	-0.1682
0.8695	0.05	-0.4268		0.869333	0.05	-0.1683
0.870333	0.05	-0.4271		0.870167	0.05	-0.1684
0.871167	0.05	-0.4274		0.871	0.05	-0.1685
0.872	0.05	-0.42765		0.871833	0.05	-0.1686
0.872833	0.05	-0.42795		0.872667	0.05	-0.1687
0.873667	0.05	-0.42825		0.8735	0.05	-0.16885
0.8745	0.05	-0.4285		0.874333	0.05	-0.16895
0.875333	0.05	-0.42875		0.875167	0.05	-0.1691
0.876167	0.05	-0.42895		0.876	0.05	-0.1692
0.877	0.05	-0.4292		0.876833	0.05	-0.1693
0.877833	0.05	-0.4294		0.877667	0.05	-0.1694
0.878667	0.05	-0.4296		0.8785	0.05	-0.1695
0.8795	0.05	-0.42975		0.879333	0.05	-0.1696
0.880333	0.05	-0.42995		0.880167	0.05	-0.1697
0.881167	0.05	-0.4301		0.881	0.05	-0.1698
0.882	0.05	-0.43025		0.881833	0.05	-0.1699
0.882833	0.05	-0.4304		0.882667	0.05	-0.17005
0.883667	0.05	-0.43065		0.8835	0.05	-0.17015
0.8845	0.05	-0.43095		0.884333	0.05	-0.17025
0.885333	0.05	-0.4313		0.885167	0.05	-0.17035
0.886167	0.05	-0.43165		0.886	0.05	-0.1705
0.887	0.05	-0.43205		0.886833	0.05	-0.1706
0.887833	0.05	-0.43245		0.887667	0.05	-0.17075
0.888667	0.05	-0.43285		0.8885	0.05	-0.17085
0.8895	0.05	-0.43335		0.889333	0.05	-0.17095
0.890333	0.05	-0.4338		0.890167	0.05	-0.1711
0.891167	0.05	-0.4343		0.891	0.05	-0.1712
0.892	0.05	-0.4347		0.891833	0.05	-0.1713
0.892833	0.05	-0.43505		0.892667	0.05	-0.1714
0.893667	0.05	-0.4354		0.8935	0.05	-0.17145
0.8945	0.05	-0.4357		0.894333	0.05	-0.1715
0.895333	0.05	-0.43605		0.895167	0.05	-0.17155
0.896167	0.05	-0.4364		0.896	0.05	-0.1716
0.897	0.05	-0.4367		0.896833	0.05	-0.17165
0.897833	0.05	-0.437		0.897667	0.05	-0.17165
0.898667	0.05	-0.4373		0.8985	0.05	-0.1717
0.8995	0.05	-0.4376		0.899333	0.05	-0.1717
0.900333	0.05	-0.4379		0.900167	0.05	-0.1717
0.901167	0.05	-0.43825		0.901	0.05	-0.1718
0.902	0.05	-0.43855		0.901833	0.05	-0.1719
0.902833	0.05	-0.4389		0.902667	0.05	-0.172
0.903667	0.05	-0.4392		0.9035	0.05	-0.1721
0.9045	0.05	-0.43955		0.904333	0.05	-0.1722
0.905333	0.05	-0.43985		0.905167	0.05	-0.1723
0.906167	0.05	-0.4402		0.906	0.05	-0.17245
0.907	0.05	-0.4405		0.906833	0.05	-0.17255
0.907833	0.05	-0.44085		0.907667	0.05	-0.1727
0.908667	0.05	-0.44115		0.9085	0.05	-0.17285
0.9095	0.05	-0.44145		0.909333	0.05	-0.17305
0.910333	0.05	-0.44175		0.910167	0.05	-0.1733
0.911167	0.05	-0.442		0.911	0.05	-0.1735
0.912	0.05	-0.4423		0.911833	0.05	-0.17375
0.912833	0.05	-0.4426		0.912667	0.05	-0.174
0.913667	0.05	-0.44285		0.9135	0.05	-0.17425
0.9145	0.05	-0.4431		0.914333	0.05	-0.17455
0.915333	0.05	-0.4434		0.915167	0.05	-0.17485
0.916167	0.05	-0.44365		0.916	0.05	-0.17515
0.917	0.05	-0.44395		0.916833	0.05	-0.1754
0.917833	0.05	-0.4442		0.917667	0.05	-0.17555
0.918667	0.05	-0.4445		0.9185	0.05	-0.1757
0.9195	0.05	-0.4448		0.919333	0.05	-0.1758
0.920333	0.05	-0.4451		0.920167	0.05	-0.1759
0.921167	0.05	-0.4454		0.921	0.05	-0.17595
0.922	0.05	-0.4457		0.921833	0.05	-0.176
0.922833	0.05	-0.446		0.922667	0.05	-0.17605
0.923667	0.05	-0.4463		0.9235	0.05	-0.1761
0.9245	0.05	-0.4466		0.924333	0.05	-0.1761
0.925333	0.05	-0.4468		0.925167	0.05	-0.1761
0.926167	0.05	-0.447		0.926	0.05	-0.17615
0.927	0.05	-0.4472		0.926833	0.05	-0.17615
0.927833	0.05	-0.44735		0.927667	0.05	-0.1762
0.928667	0.05	-0.4475		0.9285	0.05	-0.1762
0.9295	0.05	-0.44765		0.929333	0.05	-0.1762
0.930333	0.05	-0.44775		0.930167	0.05	-0.1762
0.931167	0.05	-0.4478		0.931	0.05	-0.17615
0.932	0.05	-0.4479		0.931833	0.05	-0.17615
0.932833	0.05	-0.44795		0.932667	0.05	-0.1761
0.933667	0.05	-0.4482		0.9335	0.05	-0.1762
0.9345	0.05	-0.4485		0.934333	0.05	-0.1764
0.935333	0.05	-0.4488		0.935167	0.05	-0.17665
0.936167	0.05	-0.4492		0.936	0.05	-0.17695
0.937	0.05	-0.44955		0.936833	0.05	-0.1773
0.937833	0.05	-0.45		0.937667	0.05	-0.17765
0.938667	0.05	-0.45045		0.9385	0.05	-0.17805
0.9395	0.05	-0.45095		0.939333	0.05	-0.1785
0.940333	0.05	-0.45145		0.940167	0.05	-0.179
0.941167	0.05	-0.45195		0.941	0.05	-0.1795
0.942	0.05	-0.45235		0.941833	0.05	-0.1799
0.942833	0.05	-0.4527		0.942667	0.05	-0.18015
0.943667	0.05	-0.453		0.9435	0.05	-0.18035
0.9445	0.05	-0.4533		0.944333	0.05	-0.18055
0.945333	0.05	-0.45355		0.945167	0.05	-0.1807
0.946167	0.05	-0.4538		0.946	0.05	-0.18085
0.947	0.05	-0.45405		0.946833	0.05	-0.18095
0.947833	0.05	-0.4543		0.947667	0.05	-0.18105
0.948667	0.05	-0.4545		0.9485	0.05	-0.1811
0.9495	0.05	-0.4547		0.949333	0.05	-0.18115
0.950333	0.05	-0.45505		0.950167	0.05	-0.18125
0.951167	0.05	-0.4554		0.951	0.05	-0.18145
0.952	0.05	-0.4558		0.951833	0.05	-0.1816
0.952833	0.05	-0.4562		0.952667	0.05	-0.18175
0.953667	0.05	-0.45665		0.9535	0.05	-0.18195
0.9545	0.05	-0.4571		0.954333	0.05	-0.1821
0.955333	0.05	-0.45755		0.955167	0.05	-0.1823
0.956167	0.05	-0.45805		0.956	0.05	-0.1825
0.957	0.05	-0.45855		0.956833	0.05	-0.1827
0.957833	0.05	-0.4591		0.957667	0.05	-0.1829
0.958667	0.05	-0.45945		0.9585	0.05	-0.18305
0.9595	0.05	-0.4598		0.959333	0.05	-0.18325
0.960333	0.05	-0.4601		0.960167	0.05	-0.1834
0.961167	0.05	-0.4604		0.961	0.05	-0.1836
0.962	0.05	-0.4607		0.961833	0.05	-0.18375
0.962833	0.05	-0.46095		0.962667	0.05	-0.1839
0.963667	0.05	-0.4612		0.9635	0.05	-0.18405
0.9645	0.05	-0.46145		0.964333	0.05	-0.18425
0.965333	0.05	-0.46165		0.965167	0.05	-0.1844
0.966167	0.05	-0.46185		0.966	0.05	-0.18455
0.967	0.05	-0.46205		0.966833	0.05	-0.18465
0.967833	0.05	-0.46225		0.967667	0.05	-0.1847
0.968667	0.05	-0.4625		0.9685	0.05	-0.18475
0.9695	0.05	-0.4627		0.969333	0.05	-0.18475
0.970333	0.05	-0.4629		0.970167	0.05	-0.1847
0.971167	0.05	-0.4631		0.971	0.05	-0.18465
0.972	0.05	-0.4633		0.971833	0.05	-0.1846
0.972833	0.05	-0.4635		0.972667	0.05	-0.1845
0.973667	0.05	-0.46365		0.9735	0.05	-0.1844
0.9745	0.05	-0.46385		0.974333	0.05	-0.1843
0.975333	0.05	-0.464		0.975167	0.05	-0.18425
0.976167	0.05	-0.4642		0.976	0.05	-0.1843
0.977	0.05	-0.46435		0.976833	0.05	-0.1844
0.977833	0.05	-0.4645		0.977667	0.05	-0.1845
0.978667	0.05	-0.4647		0.9785	0.05	-0.18465
0.9795	0.05	-0.46485		0.979333	0.05	-0.18475
0.980333	0.05	-0.465		0.980167	0.05	-0.1849
0.981167	0.05	-0.46515		0.981	0.05	-0.1851
0.982	0.05	-0.4653		0.981833	0.05	-0.18525
0.982833	0.05	-0.46545		0.982667	0.05	-0.18545
0.983667	0.05	-0.46565		0.9835	0.05	-0.1856
0.9845	0.05	-0.46585		0.984333	0.05	-0.1857
0.985333	0.05	-0.46605		0.985167	0.05	-0.1858
0.986167	0.05	-0.4663		0.986	0.05	-0.18585
0.987	0.05	-0.46655		0.986833	0.05	-0.1859
0.987833	0.05	-0.4668		0.987667	0.05	-0.186
0.988667	0.05	-0.4671		0.9885	0.05	-0.18605
0.9895	0.05	-0.46735		0.989333	0.05	-0.1861
0.990333	0.05	-0.46765		0.990167	0.05	-0.1861
0.991167	0.05	-0.46795		0.991	0.05	-0.18615
0.992	0.05	-0.4682		0.991833	0.05	-0.1862
0.992833	0.05	-0.46845		0.992667	0.05	-0.1863
0.993667	0.05	-0.46865		0.9935	0.05	-0.18645
0.9945	0.05	-0.4689		0.994333	0.05	-0.1866
0.995333	0.05	-0.46915		0.995167	0.05	-0.18675
0.996167	0.05	-0.46935		0.996	0.05	-0.1869
0.997	0.05	-0.4696		0.996833	0.05	-0.1871
0.997833	0.05	-0.4698		0.997667	0.05	-0.18725
0.998667	0.05	-0.47005		0.9985	0.05	-0.18745
0.9995	0.05	-0.47025		0.999333	0.05	-0.18765
1.00033	0.05	-0.47055		1.00017	0.05	-0.18785
1.00117	0.05	-0.47095		1.001	0.05	-0.188
1.002	0.05	-0.4713		1.00183	0.05	-0.18815
1.00283	0.05	-0.4717		1.00267	0.05	-0.1883
1.00367	0.05	-0.47215		1.0035	0.05	-0.18845
1.0045	0.05	-0.4726		1.00433	0.05	-0.1886
1.00533	0.05	-0.4731		1.00517	0.05	-0.1887
1.00617	0.05	-0.4736		1.006	0.05	-0.18885
1.007	0.05	-0.4741		1.00683	0.05	-0.189
1.00783	0.05	-0.4746		1.00767	0.05	-0.1891
1.00867	0.05	-0.475		1.0085	0.05	-0.18925
1.0095	0.05	-0.4753		1.00933	0.05	-0.18945
1.01033	0.05	-0.4756		1.01017	0.05	-0.18965
1.01117	0.05	-0.47585		1.011	0.05	-0.1898
1.012	0.05	-0.4761		1.01183	0.05	-0.19
1.01283	0.05	-0.4763		1.01267	0.05	-0.19025
1.01367	0.05	-0.4765		1.0135	0.05	-0.19045
1.0145	0.05	-0.4767		1.01433	0.05	-0.19065
1.01533	0.05	-0.4768		1.01517	0.05	-0.1909
1.01617	0.05	-0.47695		1.016	0.05	-0.1911
1.017	0.05	-0.47715		1.01683	0.05	-0.19125
1.01783	0.05	-0.47735		1.01767	0.05	-0.1913
1.01867	0.05	-0.47755		1.0185	0.05	-0.19125
1.0195	0.05	-0.47775		1.01933	0.05	-0.1912
1.02033	0.05	-0.47795		1.02017	0.05	-0.19115
1.02117	0.05	-0.47815		1.021	0.05	-0.19105
1.022	0.05	-0.47835		1.02183	0.05	-0.1909
1.02283	0.05	-0.47855		1.02267	0.05	-0.19075
1.02367	0.05	-0.47875		1.0235	0.05	-0.19055
1.0245	0.05	-0.4789		1.02433	0.05	-0.1903
1.02533	0.05	-0.4791		1.02517	0.05	-0.1902
1.02617	0.05	-0.47935		1.026	0.05	-0.1902
1.027	0.05	-0.47955		1.02683	0.05	-0.19025
1.02783	0.05	-0.47975		1.02767	0.05	-0.1903
1.02867	0.05	-0.47995		1.0285	0.05	-0.19035
1.0295	0.05	-0.4802		1.02933	0.05	-0.1905
1.03033	0.05	-0.4804		1.03017	0.05	-0.1906
1.03117	0.05	-0.4806		1.031	0.05	-0.19075
1.032	0.05	-0.48085		1.03183	0.05	-0.1909
1.03283	0.05	-0.48105		1.03267	0.05	-0.1911
1.03367	0.05	-0.4813		1.0335	0.05	-0.1912
1.0345	0.05	-0.4816		1.03433	0.05	-0.1913
1.03533	0.05	-0.48185		1.03517	0.05	-0.19135
1.03617	0.05	-0.48215		1.036	0.05	-0.1914
1.037	0.05	-0.48245		1.03683	0.05	-0.1915
1.03783	0.05	-0.4828		1.03767	0.05	-0.19155
1.03867	0.05	-0.4831		1.0385	0.05	-0.1916
1.0395	0.05	-0.48345		1.03933	0.05	-0.19165
1.04033	0.05	-0.48375		1.04017	0.05	-0.1917
1.04117	0.05	-0.48415		1.041	0.05	-0.1917
1.042	0.05	-0.4844		1.04183	0.05	-0.19175
1.04283	0.05	-0.48465		1.04267	0.05	-0.19185
1.04367	0.05	-0.48485		1.0435	0.05	-0.19195
1.0445	0.05	-0.48505		1.04433	0.05	-0.19205
1.04533	0.05	-0.48525		1.04517	0.05	-0.19215
1.04617	0.05	-0.4854		1.046	0.05	-0.19225
1.047	0.05	-0.4856		1.04683	0.05	-0.1924
1.04783	0.05	-0.48575		1.04767	0.05	-0.1925
1.04867	0.05	-0.48585		1.0485	0.05	-0.19265
1.0495	0.05	-0.486		1.04933	0.05	-0.19275
1.05033	0.05	-0.4862		1.05017	0.05	-0.19285
1.05117	0.05	-0.48645		1.051	0.05	-0.19295
1.052	0.05	-0.4867		1.05183	0.05	-0.19305
1.05283	0.05	-0.48695		1.05267	0.05	-0.1931
1.05367	0.05	-0.48725		1.0535	0.05	-0.1932
1.0545	0.05	-0.48755		1.05433	0.05	-0.19325
1.05533	0.05	-0.48785		1.05517	0.05	-0.1933
1.05617	0.05	-0.48815		1.056	0.05	-0.19335
1.057	0.05	-0.4885		1.05683	0.05	-0.1934
1.05783	0.05	-0.48885		1.05767	0.05	-0.19345
1.05867	0.05	-0.48915		1.0585	0.05	-0.19355
1.0595	0.05	-0.48945		1.05933	0.05	-0.19365
1.06033	0.05	-0.4897		1.06017	0.05	-0.19375
1.06117	0.05	-0.49		1.061	0.05	-0.1939
1.062	0.05	-0.4903		1.06183	0.05	-0.194
1.06283	0.05	-0.4906		1.06267	0.05	-0.19415
1.06367	0.05	-0.4909		1.0635	0.05	-0.1943
1.0645	0.05	-0.4912		1.06433	0.05	-0.19445
1.06533	0.05	-0.4915		1.06517	0.05	-0.1946
1.06617	0.05	-0.4918		1.066	0.05	-0.19475
1.067	0.05	-0.49205		1.06683	0.05	-0.19485
1.06783	0.05	-0.49235		1.06767	0.05	-0.19495
1.06867	0.05	-0.4926		1.0685	0.05	-0.195
1.0695	0.05	-0.49285		1.06933	0.05	-0.19505
1.07033	0.05	-0.4931		1.07017	0.05	-0.1951
1.07117	0.05	-0.4934		1.071	0.05	-0.19515
1.072	0.05	-0.49365		1.07183	0.05	-0.1952
1.07283	0.05	-0.49385		1.07267	0.05	-0.1952
1.07367	0.05	-0.4941		1.0735	0.05	-0.1952
1.0745	0.05	-0.49435		1.07433	0.05	-0.1952
1.07533	0.05	-0.4946		1.07517	0.05	-0.19525
1.07617	0.05	-0.4949		1.076	0.05	-0.1954
1.077	0.05	-0.49515		1.07683	0.05	-0.19555
1.07783	0.05	-0.4954		1.07767	0.05	-0.1957
1.07867	0.05	-0.4957		1.0785	0.05	-0.1959
1.0795	0.05	-0.49595		1.07933	0.05	-0.1961
1.08033	0.05	-0.49625		1.08017	0.05	-0.19635
1.08117	0.05	-0.49655		1.081	0.05	-0.1966
1.082	0.05	-0.4968		1.08183	0.05	-0.19685
1.08283	0.05	-0.4971		1.08267	0.05	-0.19715
1.08367	0.05	-0.4974		1.0835	0.05	-0.19735
1.0845	0.05	-0.49765		1.08433	0.05	-0.1975
1.08533	0.05	-0.49795		1.08517	0.05	-0.19765
1.08617	0.05	-0.49825		1.086	0.05	-0.1978
1.087	0.05	-0.4985		1.08683	0.05	-0.19795
1.08783	0.05	-0.4988		1.08767	0.05	-0.19805
1.08867	0.05	-0.4991		1.0885	0.05	-0.19815
1.0895	0.05	-0.4994		1.08933	0.05	-0.19825
1.09033	0.05	-0.4997		1.09017	0.05	-0.19835
1.09117	0.05	-0.5		1.091	0.05	-0.19845
1.092	0.05	-0.50025		1.09183	0.05	-0.19855
1.09283	0.05	-0.50045		1.09267	0.05	-0.1987
1.09367	0.05	-0.50065		1.0935	0.05	-0.1989
1.0945	0.05	-0.50085		1.09433	0.05	-0.19905
1.09533	0.05	-0.501		1.09517	0.05	-0.19925
1.09617	0.05	-0.5012		1.096	0.05	-0.19945
1.097	0.05	-0.5013		1.09683	0.05	-0.19965
1.09783	0.05	-0.50145		1.09767	0.05	-0.19985
1.09867	0.05	-0.5016		1.0985	0.05	-0.20005
1.0995	0.05	-0.5017		1.09933	0.05	-0.20025
1.10033	0.05	-0.5019		1.10017	0.05	-0.20045
1.10117	0.05	-0.50215		1.101	0.05	-0.2005
1.102	0.05	-0.5024		1.10183	0.05	-0.2006
1.10283	0.05	-0.50265		1.10267	0.05	-0.20065
1.10367	0.05	-0.50295		1.1035	0.05	-0.20065
1.1045	0.05	-0.50325		1.10433	0.05	-0.2007
1.10533	0.05	-0.50355		1.10517	0.05	-0.2007
1.10617	0.05	-0.5039		1.106	0.05	-0.20065
1.107	0.05	-0.5042		1.10683	0.05	-0.2006
1.10783	0.05	-0.5046		1.10767	0.05	-0.20055
1.10867	0.05	-0.5049		1.1085	0.05	-0.20055
1.1095	0.05	-0.50515		1.10933	0.05	-0.20065
1.11033	0.05	-0.50545		1.11017	0.05	-0.20075
1.11117	0.05	-0.50575		1.111	0.05	-0.20085
1.112	0.05	-0.506		1.11183	0.05	-0.20095
1.11283	0.05	-0.5063		1.11267	0.05	-0.20105
1.11367	0.05	-0.50655		1.1135	0.05	-0.2012
1.1145	0.05	-0.50685		1.11433	0.05	-0.20135
1.11533	0.05	-0.5071		1.11517	0.05	-0.2015
1.11617	0.05	-0.5074		1.116	0.05	-0.20165
1.117	0.05	-0.5077		1.11683	0.05	-0.2018
1.11783	0.05	-0.50805		1.11767	0.05	-0.202
1.11867	0.05	-0.5084		1.1185	0.05	-0.20215
1.1195	0.05	-0.5088		1.11933	0.05	-0.20235
1.12033	0.05	-0.50915		1.12017	0.05	-0.20255
1.12117	0.05	-0.50955		1.121	0.05	-0.20275
1.122	0.05	-0.5099		1.12183	0.05	-0.20295
1.12283	0.05	-0.5103		1.12267	0.05	-0.2032
1.12367	0.05	-0.51075		1.1235	0.05	-0.2034
1.1245	0.05	-0.51115		1.12433	0.05	-0.20365
1.12533	0.05	-0.5115		1.12517	0.05	-0.20385
1.12617	0.05	-0.5118		1.126	0.05	-0.2039
1.127	0.05	-0.51205		1.12683	0.05	-0.204
1.12783	0.05	-0.51235		1.12767	0.05	-0.20405
1.12867	0.05	-0.5126		1.1285	0.05	-0.20405
1.1295	0.05	-0.5128		1.12933	0.05	-0.2041
1.13033	0.05	-0.51305		1.13017	0.05	-0.20405
1.13117	0.05	-0.51325		1.131	0.05	-0.20405
1.132	0.05	-0.51345		1.13183	0.05	-0.204
1.13283	0.05	-0.51365		1.13267	0.05	-0.2039
1.13367	0.05	-0.51385		1.1335	0.05	-0.20395
1.1345	0.05	-0.51415		1.13433	0.05	-0.20415
1.13533	0.05	-0.5144		1.13517	0.05	-0.20435
1.13617	0.05	-0.5147		1.136	0.05	-0.20455
1.137	0.05	-0.515		1.13683	0.05	-0.2048
1.13783	0.05	-0.51525		1.13767	0.05	-0.2051
1.13867	0.05	-0.51555		1.1385	0.05	-0.2054
1.1395	0.05	-0.51585		1.13933	0.05	-0.20575
1.14033	0.05	-0.5162		1.14017	0.05	-0.20615
1.14117	0.05	-0.5165		1.141	0.05	-0.2065
1.142	0.05	-0.51675		1.14183	0.05	-0.2068
1.14283	0.05	-0.51705		1.14267	0.05	-0.20695
1.14367	0.05	-0.51735		1.1435	0.05	-0.20705
1.1445	0.05	-0.5176		1.14433	0.05	-0.2071
1.14533	0.05	-0.51785		1.14517	0.05	-0.2072
1.14617	0.05	-0.51815		1.146	0.05	-0.2072
1.147	0.05	-0.5184		1.14683	0.05	-0.20725
1.14783	0.05	-0.51865		1.14767	0.05	-0.2072
1.14867	0.05	-0.51895		1.1485	0.05	-0.20715
1.1495	0.05	-0.5192		1.14933	0.05	-0.20705
1.15033	0.05	-0.51945		1.15017	0.05	-0.2071
1.15117	0.05	-0.51975		1.151	0.05	-0.2073
1.152	0.05	-0.52005		1.15183	0.05	-0.20755
1.15283	0.05	-0.52035		1.15267	0.05	-0.2078
1.15367	0.05	-0.5206		1.1535	0.05	-0.2081
1.1545	0.05	-0.5209		1.15433	0.05	-0.2084
1.15533	0.05	-0.5212		1.15517	0.05	-0.20875
1.15617	0.05	-0.5215		1.156	0.05	-0.20915
1.157	0.05	-0.5218		1.15683	0.05	-0.2095
1.15783	0.05	-0.5221		1.15767	0.05	-0.20995
1.15867	0.05	-0.52235		1.1585	0.05	-0.2103
1.1595	0.05	-0.5225		1.15933	0.05	-0.2105
1.16033	0.05	-0.5227		1.16017	0.05	-0.21075
1.16117	0.05	-0.5229		1.161	0.05	-0.21095
1.162	0.05	-0.523		1.16183	0.05	-0.2111
1.16283	0.05	-0.52315		1.16267	0.05	-0.2113
1.16367	0.05	-0.5233		1.1635	0.05	-0.2114
1.1645	0.05	-0.5234		1.16433	0.05	-0.21155
1.16533	0.05	-0.5235		1.16517	0.05	-0.2117
1.16617	0.05	-0.52355		1.166	0.05	-0.2118
1.167	0.05	-0.52375		1.16683	0.05	-0.21185
1.16783	0.05	-0.524		1.16767	0.05	-0.2119
1.16867	0.05	-0.52425		1.1685	0.05	-0.21195
1.1695	0.05	-0.52455		1.16933	0.05	-0.21195
1.17033	0.05	-0.52485		1.17017	0.05	-0.2119
1.17117	0.05	-0.52515		1.171	0.05	-0.21185
1.172	0.05	-0.52545		1.17183	0.05	-0.21175
1.17283	0.05	-0.5258		1.17267	0.05	-0.2117
1.17367	0.05	-0.5262		1.1735	0.05	-0.2116
1.1745	0.05	-0.52655		1.17433	0.05	-0.21145
1.17533	0.05	-0.52685		1.17517	0.05	-0.21135
1.17617	0.05	-0.5271		1.176	0.05	-0.21135
1.177	0.05	-0.52735		1.17683	0.05	-0.2113
1.17783	0.05	-0.5276		1.17767	0.05	-0.21125
1.17867	0.05	-0.52785		1.1785	0.05	-0.2112
1.1795	0.05	-0.52805		1.17933	0.05	-0.2112
1.18033	0.05	-0.5283		1.18017	0.05	-0.21115
1.18117	0.05	-0.5285		1.181	0.05	-0.2111
1.182	0.05	-0.5287		1.18183	0.05	-0.2111
1.18283	0.05	-0.5289		1.18267	0.05	-0.21105
1.18367	0.05	-0.5291		1.1835	0.05	-0.21105
1.1845	0.05	-0.52935		1.18433	0.05	-0.21115
1.18533	0.05	-0.5296		1.18517	0.05	-0.2113
1.18617	0.05	-0.52985		1.186	0.05	-0.2114
1.187	0.05	-0.5301		1.18683	0.05	-0.2116
1.18783	0.05	-0.53035		1.18767	0.05	-0.21175
1.18867	0.05	-0.5306		1.1885	0.05	-0.21195
1.1895	0.05	-0.53085		1.18933	0.05	-0.2122
1.19033	0.05	-0.53115		1.19017	0.05	-0.2124
1.19117	0.05	-0.5314		1.191	0.05	-0.2127
1.192	0.05	-0.53165		1.19183	0.05	-0.2129
1.19283	0.05	-0.53185		1.19267	0.05	-0.2131
1.19367	0.05	-0.53205		1.1935	0.05	-0.21325
1.1945	0.05	-0.5323		1.19433	0.05	-0.21345
1.19533	0.05	-0.5325		1.19517	0.05	-0.2136
1.19617	0.05	-0.5327		1.196	0.05	-0.2138
1.197	0.05	-0.5329		1.19683	0.05	-0.21395
1.19783	0.05	-0.53305		1.19767	0.05	-0.2141
1.19867	0.05	-0.53325		1.1985	0.05	-0.2143
1.1995	0.05	-0.53345		1.19933	0.05	-0.21445
1.20033	0.05	-0.53365		1.20017	0.05	-0.21465
1.20117	0.05	-0.5339		1.201	0.05	-0.2149
1.202	0.05	-0.53415		1.20183	0.05	-0.2152
1.20283	0.05	-0.53445		1.20267	0.05	-0.2155
1.20367	0.05	-0.5347		1.2035	0.05	-0.2158
1.2045	0.05	-0.535		1.20433	0.05	-0.2161
1.20533	0.05	-0.5353		1.20517	0.05	-0.21645
1.20617	0.05	-0.5356		1.206	0.05	-0.2168
1.207	0.05	-0.5359		1.20683	0.05	-0.21715
1.20783	0.05	-0.53625		1.20767	0.05	-0.21755
1.20867	0.05	-0.53655		1.2085	0.05	-0.2178
1.2095	0.05	-0.53685		1.20933	0.05	-0.21785
1.21033	0.05	-0.5372		1.21017	0.05	-0.2179
1.21117	0.05	-0.5375		1.211	0.05	-0.2179
1.212	0.05	-0.53785		1.21183	0.05	-0.21785
1.21283	0.05	-0.5382		1.21267	0.05	-0.21775
1.21367	0.05	-0.5385		1.2135	0.05	-0.21765
1.2145	0.05	-0.53885		1.21433	0.05	-0.21745
1.21533	0.05	-0.5392		1.21517	0.05	-0.21725
1.21617	0.05	-0.5396		1.216	0.05	-0.217
1.217	0.05	-0.53985		1.21683	0.05	-0.2169
1.21783	0.05	-0.5401		1.21767	0.05	-0.2169
1.21867	0.05	-0.5403		1.2185	0.05	-0.2169
1.2195	0.05	-0.5405		1.21933	0.05	-0.2169
1.22033	0.05	-0.54065		1.22017	0.05	-0.2169
1.22117	0.05	-0.54085		1.221	0.05	-0.21695
1.222	0.05	-0.54095		1.22183	0.05	-0.21705
1.22283	0.05	-0.5411		1.22267	0.05	-0.2171
1.22367	0.05	-0.5412		1.2235	0.05	-0.2172
1.2245	0.05	-0.5413		1.22433	0.05	-0.2173
1.22533	0.05	-0.5415		1.22517	0.05	-0.21735
1.22617	0.05	-0.5417		1.226	0.05	-0.2174
1.227	0.05	-0.54195		1.22683	0.05	-0.21745
1.22783	0.05	-0.5422		1.22767	0.05	-0.2175
1.22867	0.05	-0.5425		1.2285	0.05	-0.2175
1.2295	0.05	-0.54275		1.22933	0.05	-0.21755
1.23033	0.05	-0.54305		1.23017	0.05	-0.2176
1.23117	0.05	-0.54335		1.231	0.05	-0.21765
1.232	0.05	-0.54365		1.23183	0.05	-0.21765
1.23283	0.05	-0.544		1.23267	0.05	-0.2177
1.23367	0.05	-0.54425		1.2335	0.05	-0.2178
1.2345	0.05	-0.5445		1.23433	0.05	-0.21795
1.23533	0.05	-0.54475		1.23517	0.05	-0.2181
1.23617	0.05	-0.545		1.236	0.05	-0.2183
1.237	0.05	-0.54525		1.23683	0.05	-0.2185
1.23783	0.05	-0.54545		1.23767	0.05	-0.2187
1.23867	0.05	-0.5457		1.2385	0.05	-0.2189
1.2395	0.05	-0.5459		1.23933	0.05	-0.21915
1.24033	0.05	-0.54615		1.24017	0.05	-0.21945
1.24117	0.05	-0.54635		1.241	0.05	-0.21975
1.242	0.05	-0.5466		1.24183	0.05	-0.21995
1.24283	0.05	-0.5468		1.24267	0.05	-0.22
1.24367	0.05	-0.54705		1.2435	0.05	-0.2201
1.2445	0.05	-0.5473		1.24433	0.05	-0.22015
1.24533	0.05	-0.5475		1.24517	0.05	-0.2202
1.24617	0.05	-0.54775		1.246	0.05	-0.2202
1.247	0.05	-0.54795		1.24683	0.05	-0.2202
1.24783	0.05	-0.5482		1.24767	0.05	-0.22015
1.24867	0.05	-0.54845		1.2485	0.05	-0.2201
1.2495	0.05	-0.54865		1.24933	0.05	-0.22
1.25033	0.05	-0.5489		1.25017	0.05	-0.22005
1.25117	0.05	-0.5491		1.251	0.05	-0.2202
1.252	0.05	-0.54935		1.25183	0.05	-0.22035
1.25283	0.05	-0.54955		1.25267	0.05	-0.22055
1.25367	0.05	-0.5498		1.2535	0.05	-0.22075
1.2545	0.05	-0.55		1.25433	0.05	-0.221
1.25533	0.05	-0.55025		1.25517	0.05	-0.2213
1.25617	0.05	-0.55045		1.256	0.05	-0.22155
1.257	0.05	-0.5507		1.25683	0.05	-0.2219
1.25783	0.05	-0.5509		1.25767	0.05	-0.2222
1.25867	0.05	-0.55115		1.2585	0.05	-0.22245
1.2595	0.05	-0.5514		1.25933	0.05	-0.22255
1.26033	0.05	-0.55165		1.26017	0.05	-0.22265
1.26117	0.05	-0.5519		1.261	0.05	-0.2227
1.262	0.05	-0.5522		1.26183	0.05	-0.22275
1.26283	0.05	-0.55245		1.26267	0.05	-0.22275
1.26367	0.05	-0.55275		1.2635	0.05	-0.22275
1.2645	0.05	-0.553		1.26433	0.05	-0.2227
1.26533	0.05	-0.5533		1.26517	0.05	-0.22265
1.26617	0.05	-0.5536		1.266	0.05	-0.22255
1.267	0.05	-0.5538		1.26683	0.05	-0.2226
1.26783	0.05	-0.554		1.26767	0.05	-0.22275
1.26867	0.05	-0.5542		1.2685	0.05	-0.2229
1.2695	0.05	-0.55435		1.26933	0.05	-0.2231
1.27033	0.05	-0.5545		1.27017	0.05	-0.2233
1.27117	0.05	-0.55465		1.271	0.05	-0.2235
1.272	0.05	-0.55475		1.27183	0.05	-0.2238
1.27283	0.05	-0.55485		1.27267	0.05	-0.22405
1.27367	0.05	-0.55495		1.2735	0.05	-0.22435
1.2745	0.05	-0.55505		1.27433	0.05	-0.22465
1.27533	0.05	-0.55525		1.27517	0.05	-0.2249
1.27617	0.05	-0.55555		1.276	0.05	-0.22505
1.277	0.05	-0.5558		1.27683	0.05	-0.22515
1.27783	0.05	-0.55615		1.27767	0.05	-0.22525
1.27867	0.05	-0.55645		1.2785	0.05	-0.2253
1.2795	0.05	-0.5568		1.27933	0.05	-0.22535
1.28033	0.05	-0.5572		1.28017	0.05	-0.2254
1.28117	0.05	-0.5576		1.281	0.05	-0.22545
1.282	0.05	-0.558		1.28183	0.05	-0.22545
1.28283	0.05	-0.55845		1.28267	0.05	-0.22545
1.28367	0.05	-0.55895		1.2835	0.05	-0.22555
1.2845	0.05	-0.55945		1.28433	0.05	-0.22575
1.28533	0.05	-0.55995		1.28517	0.05	-0.226
1.28617	0.05	-0.5605		1.286	0.05	-0.2263
1.287	0.05	-0.56105		1.28683	0.05	-0.2266
1.28783	0.05	-0.56165		1.28767	0.05	-0.22695
1.28867	0.05	-0.56225		1.2885	0.05	-0.2273
1.2895	0.05	-0.5629		1.28933	0.05	-0.2277
1.29033	0.05	-0.56355		1.29017	0.05	-0.2281
1.29117	0.05	-0.5642		1.291	0.05	-0.22855
1.292	0.05	-0.56505		1.29183	0.05	-0.229
1.29283	0.05	-0.566		1.29267	0.05	-0.2294
1.29367	0.05	-0.567		1.2935	0.05	-0.22985
1.2945	0.05	-0.56805		1.29433	0.05	-0.2303
1.29533	0.05	-0.56915		1.29517	0.05	-0.23075
1.29617	0.05	-0.5703		1.296	0.05	-0.23125
1.297	0.05	-0.5715		1.29683	0.05	-0.23175
1.29783	0.05	-0.5728		1.29767	0.05	-0.23225
1.29867	0.05	-0.5741		1.2985	0.05	-0.23275
1.2995	0.05	-0.5755		1.29933	0.05	-0.2333
1.30033	0.05	-0.5768		1.30017	0.05	-0.23395
1.30117	0.05	-0.5781		1.301	0.05	-0.23465
1.302	0.05	-0.57945		1.30183	0.05	-0.2354
1.30283	0.05	-0.5808		1.30267	0.05	-0.23625
1.30367	0.05	-0.58215		1.3035	0.05	-0.2371
1.3045	0.05	-0.58355		1.30433	0.05	-0.23795
1.30533	0.05	-0.585		1.30517	0.05	-0.2389
1.30617	0.05	-0.58645		1.306	0.05	-0.2399
1.307	0.05	-0.5879		1.30683	0.05	-0.2409
1.30783	0.05	-0.5894		1.30767	0.05	-0.24195
1.30867	0.05	-0.59095		1.3085	0.05	-0.24305
1.3095	0.05	-0.59265		1.30933	0.05	-0.2442
1.31033	0.05	-0.59435		1.31017	0.05	-0.24545
1.31117	0.05	-0.59615		1.311	0.05	-0.2467
1.312	0.05	-0.59795		1.31183	0.05	-0.248
1.31283	0.05	-0.5998		1.31267	0.05	-0.24935
1.31367	0.05	-0.6017		1.3135	0.05	-0.25075
1.3145	0.05	-0.60365		1.31433	0.05	-0.2522
1.31533	0.05	-0.60565		1.31517	0.05	-0.2537
1.31617	0.05	-0.60765		1.316	0.05	-0.25525
1.317	0.05	-0.6095		1.31683	0.05	-0.25675
1.31783	0.05	-0.6112		1.31767	0.05	-0.25825
1.31867	0.05	-0.6129		1.3185	0.05	-0.25975
1.3195	0.05	-0.6146		1.31933	0.05	-0.2613
1.32033	0.05	-0.61625		1.32017	0.05	-0.2628
1.32117	0.05	-0.6179		1.321	0.05	-0.2644
1.322	0.05	-0.6195		1.32183	0.05	-0.26595
1.32283	0.05	-0.6211		1.32267	0.05	-0.2676
1.32367	0.05	-0.62265		1.3235	0.05	-0.2692
1.3245	0.05	-0.6242		1.32433	0.05	-0.27085
1.32533	0.05	-0.6257		1.32517	0.05	-0.2725
1.32617	0.05	-0.62715		1.326	0.05	-0.2741
1.327	0.05	-0.62855		1.32683	0.05	-0.2757
1.32783	0.05	-0.6299		1.32767	0.05	-0.2773
1.32867	0.05	-0.63125		1.3285	0.05	-0.2789
1.3295	0.05	-0.63255		1.32933	0.05	-0.28055
1.33033	0.05	-0.6338		1.33017	0.05	-0.28215
1.33117	0.05	-0.635		1.331	0.05	-0.2838
1.332	0.05	-0.6362		1.33183	0.05	-0.2854
1.33283	0.05	-0.6374		1.33267	0.05	-0.28705
1.33367	0.05	-0.63835		1.3335	0.05	-0.28855
1.3345	0.05	-0.6391		1.33433	0.05	-0.2898
1.33533	0.05	-0.6398		1.33517	0.05	-0.291
1.33617	0.05	-0.64045		1.336	0.05	-0.2921
1.337	0.05	-0.641		1.33683	0.05	-0.2932
1.33783	0.05	-0.64145		1.33767	0.05	-0.2942
1.33867	0.05	-0.6418		1.3385	0.05	-0.29515
1.3395	0.05	-0.6421		1.33933	0.05	-0.29605
1.34033	0.05	-0.6423		1.34017	0.05	-0.2969
1.34117	0.05	-0.6424		1.341	0.05	-0.29765
1.342	0.05	-0.6422		1.34183	0.05	-0.29825
1.34283	0.05	-0.6418		1.34267	0.05	-0.2987
1.34367	0.05	-0.64115		1.3435	0.05	-0.299
1.3445	0.05	-0.64045		1.34433	0.05	-0.29925
1.34533	0.05	-0.63955		1.34517	0.05	-0.29935
1.34617	0.05	-0.63855		1.346	0.05	-0.2994
1.347	0.05	-0.63735		1.34683	0.05	-0.2993
1.34783	0.05	-0.63605		1.34767	0.05	-0.2991
1.34867	0.05	-0.6346		1.3485	0.05	-0.29885
1.3495	0.05	-0.633		1.34933	0.05	-0.29845
1.35033	0.05	-0.63135		1.35017	0.05	-0.2979
1.35117	0.05	-0.6296		1.351	0.05	-0.2972
1.352	0.05	-0.62775		1.35183	0.05	-0.29635
1.35283	0.05	-0.6258		1.35267	0.05	-0.2954
1.35367	0.05	-0.6237		1.3535	0.05	-0.2943
1.3545	0.05	-0.6215		1.35433	0.05	-0.29305
1.35533	0.05	-0.6192		1.35517	0.05	-0.29175
1.35617	0.05	-0.6168		1.356	0.05	-0.2903
1.357	0.05	-0.6142		1.35683	0.05	-0.28865
1.35783	0.05	-0.61155		1.35767	0.05	-0.287
1.35867	0.05	-0.60875		1.3585	0.05	-0.28505
1.3595	0.05	-0.60585		1.35933	0.05	-0.28295
1.36033	0.05	-0.6028		1.36017	0.05	-0.28065
1.36117	0.05	-0.5997		1.361	0.05	-0.27825
1.362	0.05	-0.59645		1.36183	0.05	-0.27565
1.36283	0.05	-0.59305		1.36267	0.05	-0.27295
1.36367	0.05	-0.58955		1.3635	0.05	-0.27005
1.3645	0.05	-0.58595		1.36433	0.05	-0.26705
1.36533	0.05	-0.5822		1.36517	0.05	-0.26385
1.36617	0.05	-0.57835		1.366	0.05	-0.26055
1.367	0.05	-0.57445		1.36683	0.05	-0.25715
1.36783	0.05	-0.57055		1.36767	0.05	-0.2537
1.36867	0.05	-0.56645		1.3685	0.05	-0.2501
1.3695	0.05	-0.56235		1.36933	0.05	-0.2464
1.37033	0.05	-0.5581		1.37017	0.05	-0.24255
1.37117	0.05	-0.55375		1.371	0.05	-0.2386
1.372	0.05	-0.54935		1.37183	0.05	-0.2345
1.37283	0.05	-0.5448		1.37267	0.05	-0.2303
1.37367	0.05	-0.5402		1.3735	0.05	-0.226
1.3745	0.05	-0.53545		1.37433	0.05	-0.22155
1.37533	0.05	-0.53055		1.37517	0.05	-0.21675
1.37617	0.05	-0.5255		1.376	0.05	-0.21165
1.377	0.05	-0.5203		1.37683	0.05	-0.2063
1.37783	0.05	-0.515		1.37767	0.05	-0.2008
1.37867	0.05	-0.50955		1.3785	0.05	-0.1951
1.3795	0.05	-0.504		1.37933	0.05	-0.1892
1.38033	0.05	-0.4983		1.38017	0.05	-0.1831
1.38117	0.05	-0.49255		1.381	0.05	-0.1768
1.382	0.05	-0.4866		1.38183	0.05	-0.1703
1.38283	0.05	-0.48055		1.38267	0.05	-0.1636
1.38367	0.05	-0.4745		1.3835	0.05	-0.1568
1.3845	0.05	-0.46835		1.38433	0.05	-0.14995
1.38533	0.05	-0.4621		1.38517	0.05	-0.1429
1.38617	0.05	-0.4558		1.386	0.05	-0.1357
1.387	0.05	-0.44935		1.38683	0.05	-0.12835
1.38783	0.05	-0.4428		1.38767	0.05	-0.12085
1.38867	0.05	-0.4362		1.3885	0.05	-0.11315
1.3895	0.05	-0.42945		1.38933	0.05	-0.1053
1.39033	0.05	-0.42265		1.39017	0.05	-0.0973
1.39117	0.05	-0.41575		1.391	0.05	-0.08915
1.392	0.05	-0.4086		1.39183	0.05	-0.0807
1.39283	0.05	-0.40135		1.39267	0.05	-0.0719
1.39367	0.05	-0.39395		1.3935	0.05	-0.0629
1.3945	0.05	-0.38645		1.39433	0.05	-0.0537
1.39533	0.05	-0.37885		1.39517	0.05	-0.04425
1.39617	0.05	-0.3711		1.396	0.05	-0.0346
1.397	0.05	-0.36325		1.39683	0.05	-0.02475
1.39783	0.05	-0.35525		1.39767	0.05	-0.0147
1.39867	0.05	-0.34715		1.3985	0.05	-0.0044
1.3995	0.05	-0.3389		1.39933	0.05	0.00605
1.40033	0.05	-0.33035		1.40017	0.05	0.01695
1.40117	0.05	-0.3215		1.401	0.05	0.02825
1.402	0.05	-0.3124		1.40183	0.05	0.03985
1.40283	0.05	-0.3032		1.40267	0.05	0.05175
1.40367	0.05	-0.2938		1.4035	0.05	0.0639
1.4045	0.05	-0.2842		1.40433	0.05	0.0763
1.40533	0.05	-0.2744		1.40517	0.05	0.08905
1.40617	0.05	-0.2645		1.406	0.05	0.102
1.407	0.05	-0.25435		1.40683	0.05	0.11525
1.40783	0.05	-0.244		1.40767	0.05	0.1288
1.40867	0.05	-0.2333		1.4085	0.05	0.143
1.4095	0.05	-0.2223		1.40933	0.05	0.15785
1.41033	0.05	-0.21105		1.41017	0.05	0.17315
1.41117	0.05	-0.1996		1.411	0.05	0.1888
1.412	0.05	-0.18785		1.41183	0.05	0.2049
1.41283	0.05	-0.17595		1.41267	0.05	0.22135
1.41367	0.05	-0.16375		1.4135	0.05	0.2383
1.4145	0.05	-0.15135		1.41433	0.05	0.2556
1.41533	0.05	-0.1387		1.41517	0.05	0.2733
1.41617	0.05	-0.12585		1.416	0.05	0.2914
1.417	0.05	-0.1121		1.41683	0.05	0.3104
1.41783	0.05	-0.09785		1.41767	0.05	0.33035
1.41867	0.05	-0.0831		1.4185	0.05	0.3509
1.4195	0.05	-0.06805		1.41933	0.05	0.37195
1.42033	0.05	-0.05255		1.42017	0.05	0.39365
1.42117	0.05	-0.0367		1.421	0.05	0.41585
1.422	0.05	-0.02045		1.42183	0.05	0.4387
1.42283	0.05	-0.00385		1.42267	0.05	0.46205
1.42367	0.05	0.0132		1.4235	0.05	0.48605
1.4245	0.05	0.0306		1.42433	0.05	0.51055
1.42533	0.05	0.04865		1.42517	0.05	0.5361
1.42617	0.05	0.06715		1.426	0.05	0.56265
1.427	0.05	0.08615		1.42683	0.05	0.59
1.42783	0.05	0.10555		1.42767	0.05	0.618
1.42867	0.05	0.12545		1.4285	0.05	0.64675
1.4295	0.05	0.14575		1.42933	0.05	0.6762
1.43033	0.05	0.16655		1.43017	0.05	0.7064
1.43117	0.05	0.18775		1.431	0.05	0.73735
1.432	0.05	0.2094		1.43183	0.05	0.769
1.43283	0.05	0.23145		1.43267	0.05	0.80135
1.43367	0.05	0.2544		1.4335	0.05	0.83475
1.4345	0.05	0.278		1.43433	0.05	0.8692
1.43533	0.05	0.30215		1.43517	0.05	0.90455
1.43617	0.05	0.32685		1.436	0.05	0.9407
1.437	0.05	0.3521		1.43683	0.05	0.9777
1.43783	0.05	0.37785		1.43767	0.05	1.0155
1.43867	0.05	0.4042		1.4385	0.05	1.0542
1.4395	0.05	0.43105		1.43933	0.05	1.09365
1.44033	0.05	0.45845		1.44017	0.05	1.134
1.44117	0.05	0.4864		1.441	0.05	1.17515
1.442	0.05	0.5152		1.44183	0.05	1.2172
1.44283	0.05	0.54475		1.44267	0.05	1.26005
1.44367	0.05	0.57495		1.4435	0.05	1.3038
1.4445	0.05	0.60575		1.44433	0.05	1.34835
1.44533	0.05	0.63715		1.44517	0.05	1.3938
1.44617	0.05	0.6692		1.446	0.05	1.44
1.447	0.05	0.7019		1.44683	0.05	1.48715
1.44783	0.05	0.7352		1.44767	0.05	1.535
1.44867	0.05	0.7691		1.4485	0.05	1.58385
1.4495	0.05	0.80365		1.44933	0.05	1.6334
1.45033	0.05	0.83865		1.45017	0.05	1.6835
1.45117	0.05	0.874		1.451	0.05	1.7339
1.452	0.05	0.91		1.45183	0.05	1.785
1.45283	0.05	0.94655		1.45267	0.05	1.8368
1.45367	0.05	0.9837		1.4535	0.05	1.8893
1.4545	0.05	1.02135		1.45433	0.05	1.9425
1.45533	0.05	1.0596		1.45517	0.05	1.9964
1.45617	0.05	1.0984		1.456	0.05	2.05095
1.457	0.05	1.1378		1.45683	0.05	2.1062
1.45783	0.05	1.1777		1.45767	0.05	2.16215
1.45867	0.05	1.2169		1.4585	0.05	2.2176
1.4595	0.05	1.2558		1.45933	0.05	2.27215
1.46033	0.05	1.29495		1.46017	0.05	2.327
1.46117	0.05	1.3343		1.461	0.05	2.38205
1.462	0.05	1.37385		1.46183	0.05	2.4373
1.46283	0.05	1.41365		1.46267	0.05	2.4928
1.46367	0.05	1.45365		1.4635	0.05	2.54855
1.4645	0.05	1.49385		1.46433	0.05	2.60455
1.46533	0.05	1.5343		1.46517	0.05	2.66075
1.46617	0.05	1.57495		1.466	0.05	2.7172
1.467	0.05	1.61375		1.46683	0.05	2.7725
1.46783	0.05	1.6515		1.46767	0.05	2.82635
1.46867	0.05	1.6889		1.4685	0.05	2.8799
1.4695	0.05	1.726		1.46933	0.05	2.9332
1.47033	0.05	1.76275		1.47017	0.05	2.9862
1.47117	0.05	1.7992		1.471	0.05	3.0389
1.472	0.05	1.8353		1.47183	0.05	3.09135
1.47283	0.05	1.87115		1.47267	0.05	3.14355
1.47367	0.05	1.9066		1.4735	0.05	3.19545
1.4745	0.05	1.94175		1.47433	0.05	3.2471
1.47533	0.05	1.97435		1.47517	0.05	3.29715
1.47617	0.05	2.0053		1.476	0.05	3.3454
1.477	0.05	2.0353		1.47683	0.05	3.3929
1.47783	0.05	2.0645		1.47767	0.05	3.4397
1.47867	0.05	2.0927		1.4785	0.05	3.48565
1.4795	0.05	2.12005		1.47933	0.05	3.53095
1.48033	0.05	2.14645		1.48017	0.05	3.57545
1.48117	0.05	2.172		1.481	0.05	3.61925
1.482	0.05	2.1966		1.48183	0.05	3.66225
1.48283	0.05	2.22035		1.48267	0.05	3.70455
1.48367	0.05	2.24255		1.4835	0.05	3.7454
1.4845	0.05	2.26355		1.48433	0.05	3.78485
1.48533	0.05	2.2834		1.48517	0.05	3.8232
1.48617	0.05	2.30225		1.486	0.05	3.86065
1.487	0.05	2.32		1.48683	0.05	3.89705
1.48783	0.05	2.33675		1.48767	0.05	3.9325
1.48867	0.05	2.35235		1.4885	0.05	3.96695
1.4895	0.05	2.367		1.48933	0.05	4.0005
1.49033	0.05	2.3805		1.49017	0.05	4.03295
1.49117	0.05	2.393		1.491	0.05	4.0645
1.492	0.05	2.40445		1.49183	0.05	4.0949
1.49283	0.05	2.4149		1.49267	0.05	4.12425
1.49367	0.05	2.42425		1.4935	0.05	4.1525
1.4945	0.05	2.43265		1.49433	0.05	4.1798
1.49533	0.05	2.4399		1.49517	0.05	4.206
1.49617	0.05	2.44615		1.496	0.05	4.23125
1.497	0.05	2.4513		1.49683	0.05	4.2554
1.49783	0.05	2.4555		1.49767	0.05	4.2786
1.49867	0.05	2.45855		1.4985	0.05	4.3007
1.4995	0.05	2.46065		1.49933	0.05	4.3219
1.50033	0.05	2.46265		1.50017	0.05	4.34235
1.50117	0.05	2.46435		1.501	0.05	4.3624
1.502	0.05	2.46525		1.50183	0.05	4.38155
1.50283	0.05	2.4654		1.50267	0.05	4.39985
1.50367	0.05	2.46475		1.5035	0.05	4.41725
1.5045	0.05	2.4634		1.50433	0.05	4.43385
1.50533	0.05	2.46115		1.50517	0.05	4.4495
1.50617	0.05	2.45825		1.506	0.05	4.46435
1.507	0.05	2.4545		1.50683	0.05	4.47825
1.50783	0.05	2.45005		1.50767	0.05	4.4914
1.50867	0.05	2.44555		1.5085	0.05	4.5041
1.5095	0.05	2.44075		1.50933	0.05	4.51665
1.51033	0.05	2.4354		1.51017	0.05	4.5285
1.51117	0.05	2.4295		1.511	0.05	4.53975
1.512	0.05	2.42295		1.51183	0.05	4.5502
1.51283	0.05	2.41595		1.51267	0.05	4.5601
1.51367	0.05	2.4083		1.5135	0.05	4.56925
1.5145	0.05	2.4001		1.51433	0.05	4.5778
1.51533	0.05	2.3913		1.51517	0.05	4.58565
1.51617	0.05	2.382		1.516	0.05	4.59285
1.517	0.05	2.37285		1.51683	0.05	4.59975
1.51783	0.05	2.36375		1.51767	0.05	4.6066
1.51867	0.05	2.3542		1.5185	0.05	4.61295
1.5195	0.05	2.34435		1.51933	0.05	4.6188
1.52033	0.05	2.3341		1.52017	0.05	4.6241
1.52117	0.05	2.32355		1.521	0.05	4.62895
1.522	0.05	2.3126		1.52183	0.05	4.6333
1.52283	0.05	2.30135		1.52267	0.05	4.6371
1.52367	0.05	2.2897		1.5235	0.05	4.64045
1.5245	0.05	2.2777		1.52433	0.05	4.6433
1.52533	0.05	2.2658		1.52517	0.05	4.64615
1.52617	0.05	2.2539		1.526	0.05	4.64915
1.527	0.05	2.2417		1.52683	0.05	4.65185
1.52783	0.05	2.22935		1.52767	0.05	4.65425
1.52867	0.05	2.2167		1.5285	0.05	4.65635
1.5295	0.05	2.2039		1.52933	0.05	4.65815
1.53033	0.05	2.1908		1.53017	0.05	4.65965
1.53117	0.05	2.1775		1.531	0.05	4.66085
1.532	0.05	2.16395		1.53183	0.05	4.6617
1.53283	0.05	2.1502		1.53267	0.05	4.6623
1.53367	0.05	2.13685		1.5335	0.05	4.66305
1.5345	0.05	2.1237		1.53433	0.05	4.66415
1.53533	0.05	2.11045		1.53517	0.05	4.66515
1.53617	0.05	2.0972		1.536	0.05	4.666
1.537	0.05	2.08385		1.53683	0.05	4.66675
1.53783	0.05	2.07045		1.53767	0.05	4.6674
1.53867	0.05	2.05705		1.5385	0.05	4.6679
1.5395	0.05	2.0435		1.53933	0.05	4.66835
1.54033	0.05	2.02995		1.54017	0.05	4.6686
1.54117	0.05	2.01635		1.541	0.05	4.6688
1.542	0.05	2.00285		1.54183	0.05	4.6691
1.54283	0.05	1.98945		1.54267	0.05	4.6696
1.54367	0.05	1.97605		1.5435	0.05	4.6701
1.5445	0.05	1.9626		1.54433	0.05	4.67055
1.54533	0.05	1.9492		1.54517	0.05	4.671
1.54617	0.05	1.9358		1.546	0.05	4.6714
1.547	0.05	1.92235		1.54683	0.05	4.6718
1.54783	0.05	1.90895		1.54767	0.05	4.6722
1.54867	0.05	1.8955		1.5485	0.05	4.67255
1.5495	0.05	1.88205		1.54933	0.05	4.67285
1.55033	0.05	1.86895		1.55017	0.05	4.6734
1.55117	0.05	1.85605		1.551	0.05	4.67415
1.552	0.05	1.84325		1.55183	0.05	4.675
1.55283	0.05	1.8305		1.55267	0.05	4.6759
1.55367	0.05	1.81785		1.5535	0.05	4.67685
1.5545	0.05	1.8053		1.55433	0.05	4.67785
1.55533	0.05	1.7928		1.55517	0.05	4.6789
1.55617	0.05	1.78045		1.556	0.05	4.68
1.557	0.05	1.7681		1.55683	0.05	4.6812
1.55783	0.05	1.7559		1.55767	0.05	4.68245
1.55867	0.05	1.7439		1.5585	0.05	4.6839
1.5595	0.05	1.7321		1.55933	0.05	4.68555
1.56033	0.05	1.72045		1.56017	0.05	4.68735
1.56117	0.05	1.70895		1.561	0.05	4.68925
1.562	0.05	1.6975		1.56183	0.05	4.69125
1.56283	0.05	1.68625		1.56267	0.05	4.69335
1.56367	0.05	1.6751		1.5635	0.05	4.6956
1.5645	0.05	1.66405		1.56433	0.05	4.69795
1.56533	0.05	1.65315		1.56517	0.05	4.7004
1.56617	0.05	1.6424		1.566	0.05	4.70295
1.567	0.05	1.632		1.56683	0.05	4.7056
1.56783	0.05	1.62185		1.56767	0.05	4.7084
1.56867	0.05	1.6119		1.5685	0.05	4.71125
1.5695	0.05	1.60215		1.56933	0.05	4.71425
1.57033	0.05	1.5926		1.57017	0.05	4.7173
1.57117	0.05	1.5832		1.571	0.05	4.7205
1.572	0.05	1.574		1.57183	0.05	4.7238
1.57283	0.05	1.565		1.57267	0.05	4.7272
1.57367	0.05	1.55615		1.5735	0.05	4.7307
1.5745	0.05	1.54755		1.57433	0.05	4.73435
1.57533	0.05	1.53895		1.57517	0.05	4.7379
1.57617	0.05	1.5305		1.576	0.05	4.7414
1.577	0.05	1.52215		1.57683	0.05	4.74495
1.57783	0.05	1.514		1.57767	0.05	4.7485
1.57867	0.05	1.506		1.5785	0.05	4.75215
1.5795	0.05	1.4981		1.57933	0.05	4.75585
1.58033	0.05	1.4904		1.58017	0.05	4.75955
1.58117	0.05	1.48285		1.581	0.05	4.76335
1.582	0.05	1.47545		1.58183	0.05	4.7672
1.58283	0.05	1.4682		1.58267	0.05	4.77105
1.58367	0.05	1.4611		1.5835	0.05	4.77485
1.5845	0.05	1.45415		1.58433	0.05	4.77855
1.58533	0.05	1.4474		1.58517	0.05	4.7822
1.58617	0.05	1.4408		1.586	0.05	4.78585
1.587	0.05	1.43435		1.58683	0.05	4.7895
1.58783	0.05	1.42805		1.58767	0.05	4.79315
1.58867	0.05	1.4219		1.5885	0.05	4.7968
1.5895	0.05	1.4159		1.58933	0.05	4.8005
1.59033	0.05	1.4101		1.59017	0.05	4.8041
1.59117	0.05	1.4044		1.591	0.05	4.80775
1.592	0.05	1.3987		1.59183	0.05	4.81115
1.59283	0.05	1.39305		1.59267	0.05	4.81425
1.59367	0.05	1.3875		1.5935	0.05	4.8172
1.5945	0.05	1.38205		1.59433	0.05	4.8201
1.59533	0.05	1.3767		1.59517	0.05	4.8229
1.59617	0.05	1.37145		1.596	0.05	4.8256
1.597	0.05	1.36635		1.59683	0.05	4.8282
1.59783	0.05	1.36135		1.59767	0.05	4.83075
1.59867	0.05	1.3564		1.5985	0.05	4.83315
1.5995	0.05	1.3516		1.59933	0.05	4.83545
1.60033	0.05	1.3466		1.60017	0.05	4.83755
1.60117	0.05	1.34145		1.601	0.05	4.83945
1.602	0.05	1.33635		1.60183	0.05	4.8412
1.60283	0.05	1.33125		1.60267	0.05	4.8428
1.60367	0.05	1.3262		1.6035	0.05	4.84425
1.6045	0.05	1.3212		1.60433	0.05	4.8456
1.60533	0.05	1.31615		1.60517	0.05	4.8468
1.60617	0.05	1.31115		1.606	0.05	4.8479
1.607	0.05	1.3062		1.60683	0.05	4.8488
1.60783	0.05	1.3012		1.60767	0.05	4.8496
1.60867	0.05	1.2963		1.6085	0.05	4.85015
1.6095	0.05	1.2915		1.60933	0.05	4.85045
1.61033	0.05	1.28665		1.61017	0.05	4.8506
1.61117	0.05	1.2819		1.611	0.05	4.85055
1.612	0.05	1.27715		1.61183	0.05	4.85035
1.61283	0.05	1.27245		1.61267	0.05	4.85
1.61367	0.05	1.2678		1.6135	0.05	4.84945
1.6145	0.05	1.26315		1.61433	0.05	4.84875
1.61533	0.05	1.2585		1.61517	0.05	4.84785
1.61617	0.05	1.25395		1.616	0.05	4.8468
1.617	0.05	1.24915		1.61683	0.05	4.84565
1.61783	0.05	1.24425		1.61767	0.05	4.84445
1.61867	0.05	1.23925		1.6185	0.05	4.84305
1.6195	0.05	1.2343		1.61933	0.05	4.8415
1.62033	0.05	1.22925		1.62017	0.05	4.83985
1.62117	0.05	1.2242		1.621	0.05	4.83805
1.622	0.05	1.2191		1.62183	0.05	4.8361
1.62283	0.05	1.21395		1.62267	0.05	4.834
1.62367	0.05	1.2088		1.6235	0.05	4.83175
1.6245	0.05	1.2036		1.62433	0.05	4.8294
1.62533	0.05	1.19835		1.62517	0.05	4.8268
1.62617	0.05	1.1931		1.626	0.05	4.82405
1.627	0.05	1.18775		1.62683	0.05	4.82115
1.62783	0.05	1.18245		1.62767	0.05	4.81805
1.62867	0.05	1.17705		1.6285	0.05	4.8148
1.6295	0.05	1.17165		1.62933	0.05	4.8114
1.63033	0.05	1.1662		1.63017	0.05	4.80785
1.63117	0.05	1.1607		1.631	0.05	4.80415
1.632	0.05	1.15515		1.63183	0.05	4.80025
1.63283	0.05	1.1496		1.63267	0.05	4.79625
1.63367	0.05	1.1439		1.6335	0.05	4.79215
1.6345	0.05	1.13815		1.63433	0.05	4.788
1.63533	0.05	1.1323		1.63517	0.05	4.7837
1.63617	0.05	1.1264		1.636	0.05	4.7793
1.637	0.05	1.12045		1.63683	0.05	4.7748
1.63783	0.05	1.1144		1.63767	0.05	4.77015
1.63867	0.05	1.10835		1.6385	0.05	4.76535
1.6395	0.05	1.1022		1.63933	0.05	4.76045
1.64033	0.05	1.096		1.64017	0.05	4.7554
1.64117	0.05	1.0897		1.641	0.05	4.75025
1.642	0.05	1.0834		1.64183	0.05	4.745
1.64283	0.05	1.077		1.64267	0.05	4.73965
1.64367	0.05	1.07055		1.6435	0.05	4.73415
1.6445	0.05	1.06405		1.64433	0.05	4.7286
1.64533	0.05	1.0575		1.64517	0.05	4.7229
1.64617	0.05	1.05085		1.646	0.05	4.7171
1.647	0.05	1.0442		1.64683	0.05	4.71115
1.64783	0.05	1.03745		1.64767	0.05	4.7051
1.64867	0.05	1.0306		1.6485	0.05	4.69895
1.6495	0.05	1.02375		1.64933	0.05	4.69265
1.65033	0.05	1.01695		1.65017	0.05	4.68635
1.65117	0.05	1.0102		1.651	0.05	4.68
1.652	0.05	1.00345		1.65183	0.05	4.67355
1.65283	0.05	0.99665		1.65267	0.05	4.667
1.65367	0.05	0.98985		1.6535	0.05	4.66035
1.6545	0.05	0.98305		1.65433	0.05	4.65365
1.65533	0.05	0.9762		1.65517	0.05	4.64685
1.65617	0.05	0.9693		1.656	0.05	4.63995
1.657	0.05	0.9624		1.65683	0.05	4.63295
1.65783	0.05	0.9555		1.65767	0.05	4.6259
1.65867	0.05	0.94845		1.6585	0.05	4.6187
1.6595	0.05	0.94125		1.65933	0.05	4.61135
1.66033	0.05	0.934		1.66017	0.05	4.6039
1.66117	0.05	0.9267		1.661	0.05	4.5963
1.662	0.05	0.91935		1.66183	0.05	4.58865
1.66283	0.05	0.91195		1.66267	0.05	4.5809
1.66367	0.05	0.9045		1.6635	0.05	4.573
[truncated: 58,004 more rows]

## Sheet: FT-IR
Wavenumber (cm-1)	Transmittance (%)
400	0
400	55.6
401	55.7
401	55.7
402	55.8
402	55.7
403	55.7
403	55.6
404	55.5
404	55.5
404	55.6
405	55.6
405	55.6
406	55.6
406	55.5
407	55.4
407	55.2
408	55.1
408	55
409	54.9
409	54.8
410	54.8
410	54.7
411	54.6
411	54.6
412	54.6
412	54.5
413	54.5
413	54.5
414	54.4
414	54.3
415	54.1
415	54
416	53.8
416	53.8
417	53.7
417	53.6
418	53.6
418	53.5
418	53.5
419	53.4
419	53.3
420	53.3
420	53.2
421	53.2
421	53.1
422	53.1
422	53
423	53
423	52.9
424	52.9
424	52.9
425	52.9
425	52.8
426	52.8
426	52.8
427	52.8
427	52.7
428	52.7
428	52.7
429	52.7
429	52.6
430	52.6
430	52.5
431	52.5
431	52.5
431	52.4
432	52.4
432	52.4
433	52.4
433	52.3
434	52.2
434	52.2
435	52.1
435	52.1
436	52.1
436	52
437	52
437	52
438	51.9
438	51.9
439	51.9
439	51.9
440	51.8
440	51.8
441	51.8
441	51.7
442	51.7
442	51.7
443	51.6
443	51.6
444	51.6
444	51.7
445	51.6
445	51.6
445	51.6
446	51.5
446	51.5
447	51.5
447	51.5
448	51.5
448	51.5
449	51.4
449	51.3
450	51.3
450	51.2
451	51.2
451	51.2
452	51.1
452	51.1
453	51.1
453	51
454	51
454	50.9
455	50.9
455	50.9
456	50.9
456	50.8
457	50.7
457	50.7
458	50.6
458	50.6
458	50.6
459	50.6
459	50.6
460	50.6
460	50.6
461	50.6
461	50.6
462	50.6
462	50.5
463	50.5
463	50.5
464	50.5
464	50.5
465	50.5
465	50.5
466	50.5
466	50.4
467	50.4
467	50.4
468	50.4
468	50.3
469	50.3
469	50.3
470	50.2
470	50.2
471	50.2
471	50.2
472	50.1
472	50.1
472	50.1
473	50.1
473	50.1
474	50.1
474	50.1
475	50.1
475	50.1
476	50.1
476	50
477	50
477	49.9
478	49.9
478	49.8
479	49.8
479	49.7
480	49.7
480	49.6
481	49.6
481	49.5
482	49.5
482	49.5
483	49.4
483	49.4
484	49.3
484	49.2
485	49.1
485	49.1
485	49
486	49
486	48.9
487	48.8
487	48.8
488	48.7
488	48.6
489	48.6
489	48.5
490	48.5
490	48.4
491	48.4
491	48.3
492	48.3
492	48.2
493	48.2
493	48.1
494	48
494	48
495	47.9
495	47.9
496	47.8
496	47.7
497	47.7
497	47.6
498	47.6
498	47.5
499	47.5
499	47.4
499	47.3
500	47.3
500	47.2
501	47.2
501	47.2
502	47.1
502	47
503	47
503	46.9
504	46.9
504	46.8
505	46.7
505	46.7
506	46.6
506	46.6
507	46.5
507	46.5
508	46.4
508	46.4
509	46.3
509	46.2
510	46.2
510	46.1
511	46.1
511	46
512	46
512	45.9
512	45.8
513	45.8
513	45.8
514	45.7
514	45.7
515	45.6
515	45.6
516	45.5
516	45.5
517	45.4
517	45.4
518	45.4
518	45.3
519	45.3
519	45.2
520	45.2
520	45.2
521	45.1
521	45.1
522	45.1
522	45.1
523	45.1
523	45.1
524	45
524	45
525	45
525	44.9
526	44.9
526	44.9
526	44.8
527	44.8
527	44.8
528	44.8
528	44.8
529	44.8
529	44.7
530	44.7
530	44.7
531	44.7
531	44.7
532	44.7
532	44.7
533	44.8
533	44.8
534	44.8
534	44.8
535	44.8
535	44.8
536	44.8
536	44.8
537	44.8
537	44.8
538	44.8
538	44.8
539	44.8
539	44.8
539	44.8
540	44.8
540	44.8
541	44.8
541	44.8
542	44.8
542	44.8
543	44.8
543	44.8
544	44.8
544	44.7
545	44.7
545	44.7
546	44.6
546	44.6
547	44.6
547	44.5
548	44.5
548	44.5
549	44.5
549	44.4
550	44.4
550	44.4
551	44.4
551	44.3
552	44.3
552	44.3
553	44.3
553	44.2
553	44.2
554	44.2
554	44.2
555	44.2
555	44.1
556	44.1
556	44.1
557	44.1
557	44.1
558	44.1
558	44.1
559	44.1
559	44.1
560	44.1
560	44.1
561	44
561	44
562	44
562	44
563	44
563	44
564	44
564	44
565	44
565	44
566	44
566	44
566	44
567	44
567	44
568	44
568	44
569	44
569	44
570	44
570	44
571	44
571	44
572	44
572	44
573	44
573	43.9
574	43.9
574	43.9
575	43.9
575	43.9
576	43.9
576	43.9
577	43.9
577	43.9
578	43.9
578	43.9
579	43.9
579	43.9
580	43.9
580	43.9
580	43.9
581	43.9
581	43.9
582	43.9
582	43.9
583	43.9
583	43.8
584	43.8
584	43.8
585	43.8
585	43.8
586	43.8
586	43.7
587	43.7
587	43.7
588	43.7
588	43.7
589	43.7
589	43.6
590	43.6
590	43.6
591	43.5
591	43.5
592	43.5
592	43.4
593	43.4
593	43.4
593	43.4
594	43.4
594	43.3
595	43.3
595	43.3
596	43.2
596	43.2
597	43.2
597	43.2
598	43.1
598	43.1
599	43.1
599	43.1
600	43
600	43
601	43
601	43
602	43
602	43
603	43
603	43
604	43
604	43
605	43
605	43
606	43
606	43
607	43.1
607	43.1
607	43.1
608	43.1
608	43.1
609	43.1
609	43.1
610	43.1
610	43.1
611	43.2
611	43.2
612	43.2
612	43.2
613	43.2
613	43.2
614	43.2
614	43.2
615	43.2
615	43.2
616	43.2
616	43.2
617	43.2
617	43.2
618	43.3
618	43.3
619	43.3
619	43.3
620	43.3
620	43.3
620	43.3
621	43.3
621	43.3
622	43.3
622	43.3
623	43.3
623	43.3
624	43.3
624	43.3
625	43.3
625	43.4
626	43.4
626	43.4
627	43.4
627	43.4
628	43.4
628	43.4
629	43.4
629	43.4
630	43.4
630	43.5
631	43.5
631	43.5
632	43.5
632	43.5
633	43.5
633	43.5
634	43.6
634	43.6
634	43.6
635	43.6
635	43.7
636	43.7
636	43.7
637	43.7
637	43.7
638	43.8
638	43.8
639	43.8
639	43.8
640	43.8
640	43.9
641	43.9
641	43.9
642	43.9
642	43.9
643	44
643	44
644	44
644	44
645	44.1
645	44.1
646	44.1
646	44.2
647	44.2
647	44.2
647	44.3
648	44.3
648	44.3
649	44.4
649	44.4
650	44.4
650	44.5
651	44.5
651	44.5
652	44.5
652	44.6
653	44.6
653	44.6
654	44.7
654	44.7
655	44.7
655	44.8
656	44.8
656	44.8
657	44.9
657	44.9
658	44.9
658	44.9
659	45
659	45
660	45
660	45
660	45.1
661	45.1
661	45.1
662	45.1
662	45.1
663	45.2
663	45.2
664	45.2
664	45.2
665	45.2
665	45.3
666	45.3
666	45.3
667	45.3
667	45.3
668	45.3
668	45.3
669	45.3
669	45.3
670	45.3
670	45.4
671	45.4
671	45.4
672	45.5
672	45.5
673	45.5
673	45.5
674	45.5
674	45.6
674	45.6
675	45.6
675	45.6
676	45.6
676	45.7
677	45.7
677	45.7
678	45.7
678	45.7
679	45.7
679	45.8
680	45.8
680	45.8
681	45.8
681	45.8
682	45.8
682	45.9
683	45.9
683	45.9
684	45.9
684	45.9
685	45.9
685	45.9
686	46
686	46
687	46
687	46
687	46
688	46
688	46
689	46
689	46
690	46
690	46
691	46
691	46
692	46
692	46
693	46
693	46
694	46
694	46
695	46
695	46
696	46
696	46
697	46
697	46
698	45.9
698	45.9
699	45.9
699	45.9
700	45.9
700	45.9
701	45.9
701	45.8
701	45.8
702	45.8
702	45.8
703	45.8
703	45.8
704	45.8
704	45.8
705	45.8
705	45.8
706	45.8
706	45.8
707	45.8
707	45.8
708	45.8
708	45.8
709	45.8
709	45.8
710	45.8
710	45.9
711	45.9
711	45.9
712	45.9
712	46
713	46
713	46
714	46.1
714	46.1
714	46.1
715	46.2
715	46.2
716	46.3
716	46.3
717	46.4
717	46.4
718	46.5
718	46.5
719	46.6
719	46.6
720	46.7
720	46.7
721	46.8
721	46.8
722	46.8
722	46.9
723	46.9
723	47
724	47
724	47.1
725	47.1
725	47.2
726	47.2
726	47.3
727	47.3
727	47.4
728	47.4
728	47.4
728	47.5
729	47.5
729	47.5
730	47.6
730	47.6
731	47.6
731	47.7
732	47.7
732	47.8
733	47.8
733	47.8
734	47.9
734	47.9
735	48
735	48
736	48.1
736	48.1
737	48.2
737	48.2
738	48.2
738	48.3
739	48.3
739	48.3
740	48.4
740	48.4
741	48.4
741	48.5
741	48.5
742	48.5
742	48.6
743	48.6
743	48.6
744	48.6
744	48.7
745	48.7
745	48.7
746	48.7
746	48.8
747	48.8
747	48.8
748	48.8
748	48.8
749	48.8
749	48.8
750	48.8
750	48.8
751	48.8
751	48.8
752	48.8
752	48.8
753	48.7
753	48.7
754	48.7
754	48.6
755	48.6
755	48.5
755	48.5
756	48.5
756	48.4
757	48.4
757	48.3
758	48.3
758	48.3
759	48.2
759	48.2
760	48.1
760	48.1
761	48.1
761	48
762	48
762	47.9
763	47.9
763	47.9
764	47.8
764	47.8
765	47.7
765	47.7
766	47.6
766	47.6
767	47.5
767	47.5
768	47.4
768	47.4
768	47.3
769	47.3
769	47.2
770	47.2
770	47.1
771	47.1
771	47.1
772	47
772	47
773	47
773	46.9
774	46.9
774	46.9
775	46.9
775	46.8
776	46.8
776	46.8
777	46.8
777	46.8
778	46.8
778	46.8
779	46.8
779	46.8
780	46.8
780	46.9
781	46.9
781	46.9
782	47
782	47
782	47.1
783	47.2
783	47.2
784	47.3
784	47.4
785	47.5
785	47.5
786	47.6
786	47.7
787	47.8
787	47.9
788	48
788	48.1
789	48.1
789	48.2
790	48.3
790	48.3
791	48.4
791	48.5
792	48.5
792	48.5
793	48.6
793	48.6
794	48.6
794	48.6
795	48.7
795	48.7
795	48.7
796	48.7
796	48.7
797	48.7
797	48.7
798	48.6
798	48.6
799	48.6
799	48.6
800	48.6
800	48.6
801	48.6
801	48.6
802	48.6
802	48.6
803	48.6
803	48.6
804	48.6
804	48.6
805	48.6
805	48.6
806	48.6
806	48.6
807	48.6
807	48.7
808	48.7
808	48.7
809	48.7
809	48.7
809	48.7
810	48.7
810	48.7
811	48.7
811	48.7
812	48.7
812	48.7
813	48.6
813	48.6
814	48.6
814	48.6
815	48.6
815	48.6
816	48.6
816	48.7
817	48.7
817	48.7
818	48.7
818	48.8
819	48.8
819	48.8
820	48.9
820	48.9
821	49
821	49
822	49.1
822	49.1
822	49.2
823	49.3
823	49.3
824	49.4
824	49.4
825	49.5
825	49.5
826	49.6
826	49.6
827	49.6
827	49.7
828	49.7
828	49.7
829	49.8
829	49.8
830	49.8
830	49.8
831	49.8
831	49.8
832	49.8
832	49.8
833	49.8
833	49.8
834	49.8
834	49.8
835	49.7
835	49.7
836	49.7
836	49.7
836	49.6
837	49.6
837	49.6
838	49.6
838	49.6
839	49.5
839	49.5
840	49.5
840	49.5
841	49.5
841	49.5
842	49.5
842	49.4
843	49.4
843	49.4
844	49.4
844	49.4
845	49.4
845	49.3
846	49.3
846	49.3
847	49.3
847	49.3
848	49.2
848	49.2
849	49.2
849	49.2
849	49.2
850	49.2
850	49.3
851	49.3
851	49.3
852	49.3
852	49.4
853	49.4
853	49.4
854	49.4
854	49.4
855	49.4
855	49.4
856	49.4
856	49.4
857	49.4
857	49.3
858	49.3
858	49.3
859	49.2
859	49.2
860	49.2
860	49.1
861	49.1
861	49.1
862	49
862	49
863	49
863	49
863	48.9
864	48.9
864	48.9
865	48.9
865	48.9
866	48.9
866	48.9
867	48.9
867	48.9
868	48.9
868	48.9
869	48.9
869	48.9
870	48.9
870	48.9
871	48.9
871	48.9
872	48.9
872	48.9
873	48.9
873	49
874	49
874	48.9
875	48.9
875	48.9
876	48.9
876	48.9
876	48.9
877	48.9
877	48.9
878	48.8
878	48.8
879	48.8
879	48.8
880	48.7
880	48.7
881	48.7
881	48.7
882	48.6
882	48.6
883	48.6
883	48.6
884	48.5
884	48.5
885	48.5
885	48.5
886	48.5
886	48.5
887	48.5
887	48.5
888	48.6
888	48.6
889	48.6
889	48.6
890	48.7
890	48.7
890	48.7
891	48.7
891	48.7
892	48.7
892	48.7
893	48.7
893	48.6
894	48.6
894	48.6
895	48.5
895	48.5
896	48.5
896	48.4
897	48.4
897	48.3
898	48.2
898	48.2
899	48.1
899	48.1
900	48
900	48
901	47.9
901	47.8
902	47.8
902	47.7
903	47.7
903	47.6
903	47.5
904	47.5
904	47.4
905	47.4
905	47.3
906	47.2
906	47.2
907	47.1
907	47.1
908	47
908	46.9
909	46.9
909	46.8
910	46.7
910	46.7
911	46.6
911	46.5
912	46.5
912	46.4
913	46.3
913	46.3
914	46.2
914	46.1
915	46.1
915	46
916	46
916	45.9
917	45.9
917	45.8
917	45.8
918	45.7
918	45.7
919	45.6
919	45.6
920	45.6
920	45.6
921	45.5
921	45.5
922	45.5
922	45.5
923	45.5
923	45.5
924	45.5
924	45.6
925	45.6
925	45.6
926	45.6
926	45.7
927	45.7
927	45.8
928	45.8
928	45.8
929	45.9
929	45.9
930	46
930	46
930	46.1
931	46.1
931	46.2
932	46.2
932	46.2
933	46.3
933	46.3
934	46.3
934	46.3
935	46.4
935	46.4
936	46.4
936	46.4
937	46.4
937	46.4
938	46.5
938	46.5
939	46.5
939	46.5
940	46.5
940	46.5
941	46.5
941	46.5
942	46.5
942	46.4
943	46.4
943	46.4
944	46.4
944	46.3
944	46.3
945	46.3
945	46.2
946	46.2
946	46.1
947	46
947	46
948	45.9
948	45.8
949	45.8
949	45.7
950	45.6
950	45.5
951	45.4
951	45.3
952	45.2
952	45.1
953	45
953	44.9
954	44.8
954	44.7
955	44.6
955	44.4
956	44.3
956	44.2
957	44.1
957	43.9
957	43.8
958	43.7
958	43.5
959	43.4
959	43.2
960	43.1
960	42.9
961	42.8
961	42.7
962	42.5
962	42.4
963	42.2
963	42.1
964	41.9
964	41.8
965	41.7
965	41.5
966	41.4
966	41.3
967	41.1
967	41
968	40.8
968	40.7
969	40.6
969	40.4
970	40.3
970	40.1
971	40
971	39.8
971	39.6
972	39.5
972	39.3
973	39.1
973	38.9
974	38.7
974	38.5
975	38.3
975	38.1
976	38
976	37.8
977	37.6
977	37.4
978	37.2
978	37
979	36.8
979	36.6
980	36.4
980	36.2
981	36
981	35.8
982	35.6
982	35.3
983	35.1
983	34.9
984	34.7
984	34.5
984	34.3
985	34.1
985	33.8
986	33.6
986	33.4
987	33.2
987	33
988	32.8
988	32.7
989	32.5
989	32.3
990	32.1
990	32
991	31.8
991	31.7
992	31.6
992	31.4
993	31.3
993	31.2
994	31.1
994	31
995	30.8
995	30.7
996	30.6
996	30.5
997	30.4
997	30.3
997	30.2
998	30.1
998	29.9
999	29.8
999	29.7
1000	29.5
1000	29.4
1000	29.2
1000	29.1
1000	28.9
1000	28.7
1000	28.5
1000	28.3
1000	28.1
1000	27.9
1000	27.7
1010	27.5
1010	27.3
1010	27.1
1010	26.9
1010	26.7
1010	26.5
1010	26.3
1010	26
1010	25.8
1010	25.6
1010	25.4
1010	25.2
1010	25
1010	24.8
1010	24.5
1010	24.3
1010	24.1
1010	23.9
1010	23.7
1010	23.5
1010	23.3
1020	23.1
1020	22.9
1020	22.7
1020	22.5
1020	22.3
1020	22.1
1020	21.9
1020	21.7
1020	21.5
1020	21.4
1020	21.2
1020	21.1
1020	20.9
1020	20.8
1020	20.7
1020	20.5
1020	20.4
1020	20.3
1020	20.2
1020	20.1
1020	20.1
1030	20
1030	19.9
1030	19.9
1030	19.8
1030	19.7
1030	19.7
1030	19.7
1030	19.6
1030	19.6
1030	19.6
1030	19.5
1030	19.5
1030	19.5
1030	19.5
1030	19.5
1030	19.4
1030	19.4
1030	19.4
1030	19.4
1030	19.4
1040	19.4
1040	19.4
1040	19.4
1040	19.4
1040	19.4
1040	19.4
1040	19.4
1040	19.4
1040	19.4
1040	19.4
1040	19.4
1040	19.4
1040	19.4
1040	19.4
1040	19.4
1040	19.4
1040	19.4
1040	19.5
1040	19.5
1040	19.5
1040	19.5
1050	19.5
1050	19.5
1050	19.5
1050	19.6
1050	19.6
1050	19.6
1050	19.6
1050	19.6
1050	19.7
1050	19.7
1050	19.7
1050	19.7
1050	19.8
1050	19.8
1050	19.8
1050	19.9
1050	19.9
1050	20
1050	20
1050	20.1
1050	20.2
1060	20.2
1060	20.3
1060	20.4
1060	20.4
1060	20.5
1060	20.6
1060	20.6
1060	20.7
1060	20.8
1060	20.8
1060	20.9
1060	20.9
1060	21
1060	21
1060	21
1060	21
1060	21.1
1060	21.1
1060	21.1
1060	21
1060	21
1070	21
1070	20.9
1070	20.9
1070	20.8
1070	20.8
1070	20.7
1070	20.6
1070	20.5
1070	20.5
1070	20.4
1070	20.3
1070	20.2
1070	20.2
1070	20.1
1070	20
1070	20
1070	19.9
1070	19.8
1070	19.8
1070	19.7
1080	19.7
1080	19.7
1080	19.7
1080	19.7
1080	19.7
1080	19.7
1080	19.7
1080	19.7
1080	19.8
1080	19.8
1080	19.9
1080	20
1080	20
1080	20.1
1080	20.2
1080	20.3
1080	20.5
1080	20.6
1080	20.7
1080	20.9
1080	21
1090	21.2
1090	21.3
1090	21.5
1090	21.7
1090	21.8
1090	22
1090	22.2
1090	22.3
1090	22.5
1090	22.7
1090	22.9
1090	23
1090	23.2
1090	23.3
1090	23.5
1090	23.6
1090	23.7
1090	23.8
1090	24
1090	24.1
1090	24.1
1100	24.2
1100	24.3
1100	24.3
1100	24.4
1100	24.4
1100	24.5
1100	24.5
1100	24.5
1100	24.6
1100	24.6
1100	24.6
1100	24.6
1100	24.7
1100	24.7
1100	24.7
1100	24.7
1100	24.8
1100	24.8
1100	24.8
1100	24.9
1110	24.9
1110	25
1110	25.1
1110	25.1
1110	25.2
1110	25.2
1110	25.3
1110	25.4
1110	25.5
1110	25.6
1110	25.6
1110	25.7
1110	25.8
1110	25.9
1110	26
1110	26.1
1110	26.2
1110	26.3
1110	26.4
1110	26.6
1110	26.7
1120	26.8
1120	26.9
1120	27
1120	27.1
1120	27.3
1120	27.4
1120	27.5
1120	27.6
1120	27.8
1120	27.9
1120	28
1120	28.2
1120	28.3
1120	28.5
1120	28.6
1120	28.7
1120	28.8
1120	29
1120	29.1
1120	29.2
1120	29.3
1130	29.4
1130	29.5
1130	29.6
1130	29.7
1130	29.8
1130	29.9
1130	30
1130	30
1130	30.1
1130	30.2
1130	30.2
1130	30.3
1130	30.3
1130	30.4
1130	30.4
1130	30.5
1130	30.5
1130	30.5
1130	30.5
1130	30.5
1130	30.5
1140	30.5
1140	30.5
1140	30.5
1140	30.5
1140	30.5
1140	30.4
1140	30.4
1140	30.4
1140	30.3
1140	30.3
1140	30.2
1140	30.1
1140	30.1
1140	30
1140	29.9
1140	29.8
1140	29.8
1140	29.7
1140	29.6
1140	29.6
1150	29.5
1150	29.5
1150	29.4
1150	29.4
1150	29.4
1150	29.4
1150	29.4
1150	29.4
1150	29.4
1150	29.4
1150	29.5
1150	29.5
1150	29.6
1150	29.7
1150	29.8
1150	29.9
1150	30
1150	30.2
1150	30.3
1150	30.5
1150	30.6
1160	30.8
1160	31
1160	31.2
1160	31.4
1160	31.6
1160	31.8
1160	32
1160	32.2
1160	32.4
1160	32.7
1160	32.9
1160	33.1
1160	33.3
1160	33.5
1160	33.7
1160	33.9
1160	34.1
1160	34.2
1160	34.4
1160	34.6
1160	34.7
1170	34.8
1170	35
1170	35.1
1170	35.2
1170	35.3
1170	35.4
1170	35.5
1170	35.6
1170	35.6
1170	35.7
1170	35.7
1170	35.8
1170	35.8
1170	35.8
1170	35.9
1170	35.9
1170	35.9
1170	35.9
1170	35.9
1170	35.9
1170	35.9
1180	35.9
1180	35.9
1180	35.9
1180	35.9
1180	35.9
1180	35.9
1180	35.9
1180	35.9
1180	35.8
1180	35.8
1180	35.8
1180	35.8
1180	35.7
1180	35.7
1180	35.7
1180	35.7
1180	35.6
1180	35.6
1180	35.6
1180	35.5
1190	35.5
1190	35.4
1190	35.4
1190	35.3
1190	35.3
1190	35.2
1190	35.2
1190	35.1
1190	35.1
1190	35
1190	35
1190	34.9
1190	34.9
1190	34.8
1190	34.7
1190	34.7
1190	34.6
1190	34.6
1190	34.5
1190	34.5
1190	34.4
1200	34.3
1200	34.3
1200	34.2
1200	34.2
1200	34.2
1200	34.1
1200	34.1
1200	34.1
1200	34
1200	34
1200	34
1200	34
1200	34
1200	34
1200	34
1200	34
1200	34
1200	34
1200	34
1200	34
1200	34
1210	34.1
1210	34.1
1210	34.1
1210	34.2
1210	34.2
1210	34.2
1210	34.3
1210	34.3
1210	34.3
1210	34.4
1210	34.4
1210	34.4
1210	34.5
1210	34.5
1210	34.5
1210	34.6
1210	34.6
1210	34.6
1210	34.6
1210	34.6
1210	34.7
1220	34.7
1220	34.7
1220	34.7
1220	34.7
1220	34.7
1220	34.7
1220	34.7
1220	34.7
1220	34.7
1220	34.7
1220	34.7
1220	34.7
1220	34.7
1220	34.7
1220	34.7
1220	34.7
1220	34.6
1220	34.6
1220	34.6
1220	34.6
1230	34.6
1230	34.6
1230	34.6
1230	34.6
1230	34.6
1230	34.6
1230	34.6
1230	34.6
1230	34.6
1230	34.6
1230	34.6
1230	34.6
1230	34.6
1230	34.6
1230	34.6
1230	34.6
1230	34.6
1230	34.6
1230	34.7
1230	34.7
1230	34.7
1240	34.7
1240	34.7
1240	34.7
1240	34.7
1240	34.7
1240	34.7
1240	34.7
1240	34.7
1240	34.7
1240	34.7
1240	34.7
1240	34.7
1240	34.7
1240	34.7
1240	34.7
1240	34.8
1240	34.8
1240	34.8
1240	34.8
1240	34.8
1240	34.8
1250	34.8
1250	34.8
1250	34.8
1250	34.8
1250	34.8
1250	34.8
1250	34.8
1250	34.7
1250	34.7
1250	34.7
1250	34.7
1250	34.7
1250	34.7
1250	34.7
1250	34.7
1250	34.7
1250	34.6
1250	34.6
1250	34.6
1250	34.6
1250	34.5
1260	34.5
1260	34.5
1260	34.4
1260	34.4
1260	34.4
1260	34.3
1260	34.3
1260	34.3
1260	34.2
1260	34.2
1260	34.1
1260	34.1
1260	34.1
1260	34
1260	34
1260	33.9
1260	33.9
1260	33.9
1260	33.9
1260	33.9
1270	33.9
1270	33.8
1270	33.9
1270	33.9
1270	33.9
1270	33.9
1270	33.9
1270	33.9
1270	34
1270	34
1270	34
1270	34.1
1270	34.1
1270	34.2
1270	34.2
1270	34.2
1270	34.3
1270	34.3
1270	34.4
1270	34.4
1270	34.5
1280	34.5
1280	34.6
1280	34.6
1280	34.6
1280	34.7
1280	34.7
1280	34.8
1280	34.8
1280	34.9
1280	34.9
1280	35
1280	35
1280	35.1
1280	35.1
1280	35.2
1280	35.2
1280	35.3
1280	35.3
1280	35.4
1280	35.4
1280	35.5
1290	35.5
1290	35.6
1290	35.6
1290	35.7
1290	35.7
1290	35.8
1290	35.8
1290	35.9
1290	35.9
1290	35.9
1290	36
1290	36
1290	36.1
1290	36.1
1290	36.1
1290	36.2
1290	36.2
1290	36.2
1290	36.3
1290	36.3
1290	36.3
1300	36.4
1300	36.4
1300	36.4
1300	36.5
1300	36.5
1300	36.5
1300	36.5
1300	36.5
1300	36.6
1300	36.6
1300	36.6
1300	36.6
1300	36.6
1300	36.6
1300	36.6
1300	36.6
1300	36.6
1300	36.6
1300	36.6
1300	36.6
1310	36.6
1310	36.6
1310	36.6
1310	36.6
1310	36.6
1310	36.6
1310	36.6
1310	36.6
1310	36.6
1310	36.6
1310	36.6
1310	36.6
1310	36.6
1310	36.6
1310	36.6
1310	36.6
1310	36.6
1310	36.6
1310	36.6
1310	36.6
1310	36.6
1320	36.6
1320	36.6
1320	36.6
1320	36.6
1320	36.6
1320	36.6
1320	36.6
1320	36.6
1320	36.6
1320	36.6
1320	36.6
1320	36.6
1320	36.6
1320	36.6
1320	36.6
1320	36.6
1320	36.5
1320	36.5
1320	36.5
1320	36.5
1320	36.5
1330	36.5
1330	36.4
1330	36.4
1330	36.4
1330	36.4
1330	36.3
1330	36.3
1330	36.3
1330	36.2
1330	36.2
1330	36.2
1330	36.1
1330	36.1
1330	36.1
1330	36
1330	36
1330	36
1330	35.9
1330	35.9
1330	35.8
1330	35.8
1340	35.8
1340	35.7
1340	35.7
1340	35.7
1340	35.7
1340	35.6
1340	35.6
1340	35.6
1340	35.5
1340	35.5
1340	35.5
1340	35.4
1340	35.4
1340	35.3
1340	35.3
1340	35.3
1340	35.2
1340	35.2
1340	35.2
1340	35.2
1350	35.1
1350	35.1
1350	35.1
1350	35
1350	35
1350	35
1350	34.9
1350	34.9
1350	34.9
1350	34.8
1350	34.8
1350	34.7
1350	34.7
1350	34.6
1350	34.6
1350	34.5
1350	34.5
1350	34.4
1350	34.4
1350	34.4
1350	34.3
1360	34.3
1360	34.2
1360	34.2
1360	34.1
1360	34.1
1360	34.1
1360	34
1360	34
1360	34
1360	34
1360	34
1360	34
1360	34
1360	34
1360	34
1360	33.9
1360	33.9
[truncated: 5,470 more rows]
